# Supplementary material for: α-Trideuteration of methylarenes
Source: Royal Society of Chemistry journal article supplement (doi:10.1039/d1qo00265a), 2021-01-01
Supplement: d1qo00265a1.pdf [file d1qo00265a1.pdf]

Supporting Information for

## $\alpha$ -Trideuteration of Methylarenes

Lin Tie,<sup>a</sup> Xiang-Huan Shan,<sup>a</sup> Jian-Ping Qu,<sup>b,\*</sup> and Yan-Biao Kang<sup>a,\*</sup>

<sup>a</sup>Department of Chemistry, University of Science and Technology of China, Hefei, Anhui 230026, China. E-mail: ybkang@ustc.edu.cn

<sup>b</sup>Institute of Advanced Synthesis, School of Chemistry and Molecular Engineering, Nanjing Tech University, Nanjing 211816, China. E-mail: ias\_jpqu@njtech.edu.cn

### Contents

|                            |         |
|----------------------------|---------|
| 1. General information     | S1      |
| 2. Experimental procedures | S2–S11  |
| 3. References              | S11     |
| 4. NMR spectra             | S12–S93 |

#### 1. General information

Solvents were heated to reflux over CaH<sub>2</sub> (DMSO-*d*<sub>6</sub>) under N<sub>2</sub> atmosphere and collected by distillation. All other reagents were used without purification as commercially available, such as NaOH, <sup>t</sup>BuOK, NaH and 4-Phenyltoluene. All reactions were monitored and confirmed by TLC silica gel plate. The separation yield is obtained by using analytically pure reagents through silica gel under air conditions. <sup>1</sup>H, <sup>13</sup>C{<sup>1</sup>H} NMR spectra were recorded on Bruker 400/500 spectrometer. <sup>2</sup>H NMR spectra were recorded on JNM-ECZ600R/S1 600 spectrometer. Chemical shifts are reported in  $\delta$  units relative to CDCl<sub>3</sub> [<sup>1</sup>H  $\delta$  = 7.26, <sup>13</sup>C  $\delta$  = 77.36] and DMSO-*d*<sub>6</sub> [<sup>1</sup>H  $\delta$  = 2.50, <sup>13</sup>C  $\delta$  = 39.52]. HRMS and GC were recorded by the mass spectrometry service at University of Science and Technology of China.

## 2. Experimental procedures

### 2.1. Preparation of Starting Materials

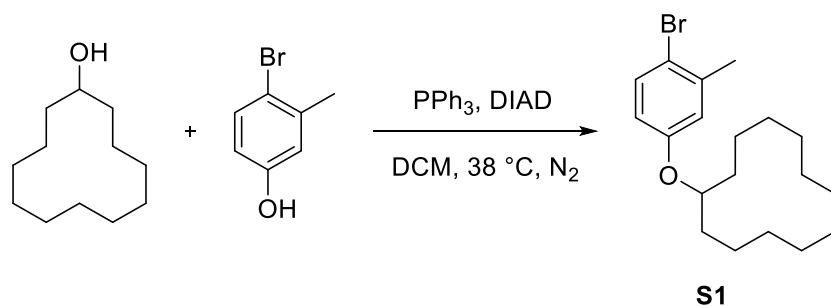

To a solution of Cyclododecanol (55 mmol, 1.1 equiv), 4-bromo-3-methylphenol (50 mmol, 1.0 equiv) and PPh<sub>3</sub> (75 mmol, 1.5 equiv) in DCM (100 mL) was added DIAD (75 mmol, 1.5 equiv) under N<sub>2</sub> atmosphere. The mixture was stirred at 30 °C for 132 h. The resulting reaction mixture was monitored by TLC. After cooling, the reaction mixture was poured into H<sub>2</sub>O and extracted with DCM (30 mL, three times). The combined organic layers were dried over anhydrous Na<sub>2</sub>SO<sub>4</sub> and concentrated by rotary evaporation, then purified by flash column chromatography (PE/EA/DCM = 100:1:1) on silica gel to give the compound **S1** as white solid (10.4 g, 59% yield) m.p. 45-47 °C. <sup>1</sup>H NMR (400 MHz, CDCl<sub>3</sub>) δ 7.38 (d, *J* = 8.72 Hz, 1H), 6.79 (d, *J* = 2.76 Hz, 1H), 6.60 (dd, *J* = 8.72, 2.88 Hz, 1H), 4.39-4.33 (m, 1H), 2.35 (s, 3H), 1.81-1.73 (m, 2H), 1.66-1.59 (m, 2H), 1.47-1.38 (m, 18H). <sup>13</sup>C {<sup>1</sup>H} NMR (100 MHz, CDCl<sub>3</sub>) δ 157.6, 138.9, 132.9, 118.9, 115.2, 114.8, 75.8, 28.7, 24.7, 24.4, 23.3, 23.3, 23.2, 20.8. HRMS (EI) *m/z*: [M]<sup>+</sup> calcd for C<sub>19</sub>H<sub>29</sub>OBr<sup>+</sup> 352.1396; found 352.1393.

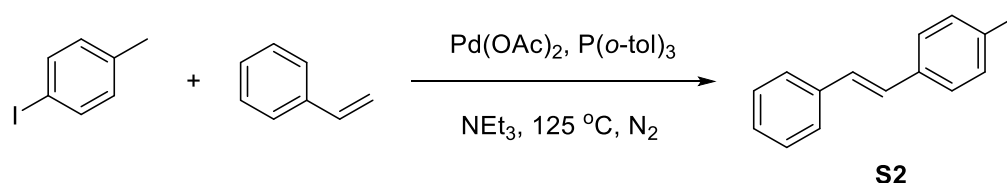

To a solution of 1-iodo-4-methylbenzene (20 mmol, 1 equiv), Pd(OAc)<sub>2</sub> (1 mmol, 5 mol%), P(*o*-tol)<sub>3</sub> (4 mmol, 20 mol%), styrene (40 mmol, 2 equiv) was added NEt<sub>3</sub> (20 mL) under N<sub>2</sub> atmosphere. The mixture was stirred at 125 °C for 16 h. After cooling, the reaction mixture was poured into water and then the product was extracted with DCM (30 mL, three times). The combined organic layer was washed with brine, dried over Na<sub>2</sub>SO<sub>4</sub>, and concentrated in vacuo. The residue was purified by column chromatography (PE) on silica gel to afford the corresponding **S2** as white solid (2.21 g, 57% yield). <sup>1</sup>H NMR (500 MHz, CDCl<sub>3</sub>) δ 7.51 (d, *J* = 7.75 Hz, 2H), 7.42 (d, *J* = 7.9 Hz, 2H), 7.36 (t, *J* = 7.55 Hz, 2H), 7.27-7.24 (m, 1H), 7.18 (d, *J* = 7.8 Hz, 2H), 7.12-7.05 (m, 2H), 2.37 (s, 3H). <sup>13</sup>C {<sup>1</sup>H} NMR (125 MHz, CDCl<sub>3</sub>) δ 137.7, 134.7, 129.5, 128.8, 128.8, 127.8, 127.5, 126.6, 126.5, 21.4.<sup>1</sup>

## 2.2. General procedure

**Condition A:** To a Schlenk tube charged with **1a** (0.5 mmol, 1.0 equiv) and NaOH (2.0 equiv, 40.8 mg) was added solvent (1 mL) under N<sub>2</sub> atmosphere and the resulting reaction mixture was stirred at 110 °C for 6 h (oil bath). The reaction mixture was directly purified by silica gel column to give the pure product.

**Condition B:** To a Schlenk tube charged with **1a** (0.5 mmol, 1.0 equiv) and <sup>t</sup>BuOK (20 mol%, 11.2 mg) was added solvent (1 mL) under N<sub>2</sub> atmosphere and the resulting reaction mixture was stirred at 30 °C for 6 h (oil bath). The reaction mixture was directly purified by silica gel column to give the pure product.

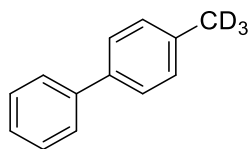

**4-(methyl-*d*<sub>3</sub>)-1,1'-biphenyl (1a-*d*<sub>3</sub>)<sup>2</sup>**

Prepared according to the general procedure **Condition A**, T = 110 °C, t = 6 h. Purification was performed by flash column chromatography (PE), 84.7 mg, 99% yield, 97% D-rate. **Condition B**, T = 30 °C, t = 6 h. Purification was performed by flash column chromatography (PE), 83.7 mg, 98% yield, 98% D-rate. White solid. <sup>1</sup>H NMR (400 MHz, CDCl<sub>3</sub>): δ 7.62-7.60 (m, 2H, *Ar* C-H), 7.54-7.51 (m, 2H, *Ar* C-H), 7.47-7.43 (m, 2H, *Ar* C-H), 7.37-7.33 (m, 1H, *Ar* C-H), 7.29-7.26 (m, 2H, *Ar* C-H), 2.40-2.39 (m, 0.09H, 97% D, benzylic CH). <sup>13</sup>C{<sup>1</sup>H} NMR (100 MHz, CDCl<sub>3</sub>): δ 141.3, 138.5, 137.0, 129.6, 128.8, 127.1, 20.9-20.0 (m). <sup>2</sup>H NMR (92 MHz, MeCN): δ 4.09.

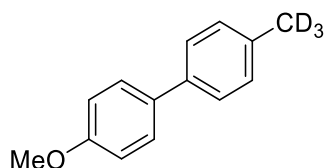

**4-methoxy-4'-(methyl-*d*<sub>3</sub>)-1,1'-biphenyl (1b-*d*<sub>3</sub>)**

Prepared according to the general procedure **Condition A**, T = 110 °C, t = 6 h. Purification was performed by flash column chromatography (PE/EA/DCM = 20:1:1), 92.6 mg, 92% yield, 90% D-rate. **Condition B**, T = 50 °C, t = 6 h. Purification was performed by flash column chromatography (PE/EA/DCM = 20:1:1), 100.3 mg, 100% yield, 97% D-rate. White solid (m.p. 94-96 °C). <sup>1</sup>H NMR (400 MHz, CDCl<sub>3</sub>): δ 7.55-7.52 (m, 2H, *Ar* C-H), 7.48-7.46 (m, 2H, *Ar* C-H), 7.26-7.24 (m, 2H, *Ar* C-H), 7.00-6.97 (m, 2H, *Ar* C-H), 3.86 (s, 3H, OCH<sub>3</sub>), 2.39-2.36 (m, 0.08H, 97% D, benzylic CH). <sup>13</sup>C{<sup>1</sup>H} NMR (100 MHz, CDCl<sub>3</sub>): δ 159.0, 138.1, 136.4, 133.9, 129.6, 128.1, 126.7, 114.3, 55.5, 21.0-20.3 (m). <sup>2</sup>H NMR (92 MHz, MeCN): δ 4.08. HRMS (EI) m/z: [M]<sup>+</sup> calcd for C<sub>14</sub>H<sub>11</sub>D<sub>3</sub>O<sup>+</sup> 201.1228; found 201.1224.

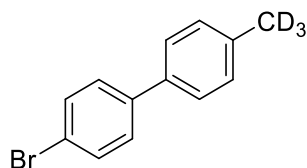

**4-bromo-4'-(methyl-*d*<sub>3</sub>)-1,1'-biphenyl (1c-*d*<sub>3</sub>)**

Prepared according to the general procedure **Condition A**, T = 110 °C, t = 6 h. Purification was performed by flash column chromatography (PE/EA/DCM = 20:1:1), 115.3 mg, 92% yield, 75% D-rate.

**Condition B**, T = 90 °C, t = 6 h. Purification was performed by flash column chromatography (PE/EA/DCM = 20:1:1), 107.5 mg, 86% yield, 97% D-rate. White solid (m.p. 115-117 °C). <sup>1</sup>H NMR (400 MHz, CDCl<sub>3</sub>): δ 7.56-7.54 (m, 2H, *Ar* C-H), 7.47-7.43 (m, 4H, *Ar* C-H), 7.26-7.24 (m, 2H, *Ar* C-H), 2.37-2.36 (m, 0.09H, 97% D, benzylic *CH*). <sup>13</sup>C{<sup>1</sup>H} NMR (100 MHz, CDCl<sub>3</sub>): δ 140.2, 137.5, 137.2, 131.9, 129.8, 128.7, 126.9, 121.3, 20.6-20.3 (m). <sup>2</sup>H NMR (92 MHz, MeCN): δ 4.09. HRMS (EI) m/z: [M]<sup>+</sup> calcd for C<sub>13</sub>H<sub>8</sub>D<sub>3</sub>Br<sup>+</sup> 249.0227; found 249.0227.

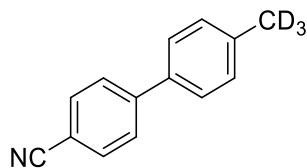

**4'-(methyl-*d*<sub>3</sub>)-[1,1'-biphenyl]-4-carbonitrile (1*d-d*<sub>3</sub>)**

Prepared according to the general procedure **Condition B**, T = 30 °C, t = 6 h. Purification was performed by flash column chromatography (PE/EA/DCM = 20:1:1), 78.7 mg, 80% yield, 92% D-rate. White solid (m.p. 99-101 °C). <sup>1</sup>H NMR (400 MHz, CDCl<sub>3</sub>): δ 7.72-7.66 (m, 4H, *Ar* C-H), 7.51-7.48 (m, 2H, *Ar* C-H), 7.31-7.27 (m, 2H, *Ar* C-H), 2.39-2.38 (m, 0.25H, 92% D, benzylic *CH*). <sup>13</sup>C{<sup>1</sup>H} NMR (100 MHz, CDCl<sub>3</sub>): δ 145.7, 138.8, 136.4, 132.7, 129.9, 127.6, 127.2, 119.2, 110.6, 20.8-20.3 (m). <sup>2</sup>H NMR (92 MHz, MeCN): δ 4.09. HRMS (ESI-TOF) m/z: [M+H]<sup>+</sup> calcd for C<sub>14</sub>H<sub>9</sub>D<sub>3</sub>N<sup>+</sup> 197.1153; found 197.1151.

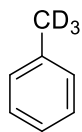

**toluene-*d*<sub>3</sub> (1*e-d*<sub>3</sub>)**

Prepared according to the general procedure **Condition B**, T = 90 °C, t = 6 h. Purification was performed by flash column chromatography (PE), GC: 97% yield, 97% D-rate. Colorless oil liquid. <sup>1</sup>H NMR (400 MHz, CDCl<sub>3</sub>): δ 7.30-7.25 (m, 2H, *Ar* C-H), 7.21-7.15 (m, 3H, *Ar* C-H), 2.35-2.34 (m, 0.1H, 97% D, benzylic *CH*). <sup>13</sup>C{<sup>1</sup>H} NMR (100 MHz, CDCl<sub>3</sub>): δ 137.9, 129.2, 128.4, 125.5, 21.0-20.6 (m). <sup>2</sup>H NMR (92 MHz, DCM): δ 3.25. HRMS (EI) m/z: [M]<sup>+</sup> calcd for C<sub>7</sub>H<sub>5</sub>D<sub>3</sub><sup>+</sup> 95.0809; found 95.0804.

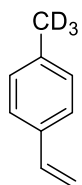

**1-(methyl-*d*<sub>3</sub>)-4-vinylbenzene (1*f-d*<sub>3</sub>)**

Prepared according to the general procedure **Condition B**, T = 30 °C, t = 6 h. Purification was performed by flash column chromatography (PE), 59% NMR yield, 96% D-rate. Colorless oil liquid. <sup>1</sup>H NMR (400 MHz, CDCl<sub>3</sub>): δ 7.33-7.31 (m, 2H, *Ar* C-H), 7.15-7.13 (m, 2H, *Ar* C-H), 6.70 (dd, *J* = 17.6, 10.88 Hz, 1H, C=CH), 5.70 (dd, *J* = 17.6, 0.88 Hz, 1H, C=CH), 5.19 (dd, *J* = 10.88, 0.88 Hz, 1H, C=CH), 2.32-2.31 (m, 0.11H, 96% D, benzylic *CH*). <sup>13</sup>C{<sup>1</sup>H} NMR (125 MHz, CDCl<sub>3</sub>): δ 137.6, 136.9, 135.0, 129.3, 126.2, 112.9, 20.8-20.2 (m). <sup>2</sup>H NMR (92 MHz, DCM): δ 3.24. HRMS (EI) m/z: [M]<sup>+</sup> calcd for C<sub>9</sub>H<sub>7</sub>D<sub>3</sub><sup>+</sup> 121.0965; found 121.0965.

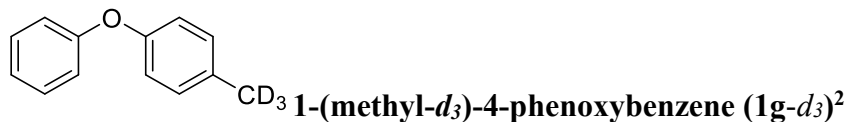

Prepared according to the general procedure **Condition A**, T = 110 °C, t = 6 h. Purification was performed by flash column chromatography (PE), 85.1 mg, 91% yield, 98% D-rate. Colorless oil liquid. <sup>1</sup>H NMR (400 MHz, CDCl<sub>3</sub>): δ 7.38-7.33 (m, 2H, *Ar* C-H), 7.25-7.21 (m, 1H, *Ar* C-H), 7.14-7.09 (m, 1H, *Ar* C-H), 7.05-7.02 (m, 2H, *Ar* C-H), 6.95-6.92 (m, 1H, *Ar* C-H), 6.86-6.83 (m, 2H, *Ar* C-H), 2.35-2.32 (m, 0.05H, 98% D, benzylic CH). <sup>13</sup>C{<sup>1</sup>H} NMR (100 MHz, CDCl<sub>3</sub>): δ 157.5, 157.3, 139.9, 129.8, 129.6, 124.2, 123.2, 119.7, 119.0, 116.1, 21.1-20.3 (m). <sup>2</sup>H NMR (92 MHz, MeCN): δ 4.00.

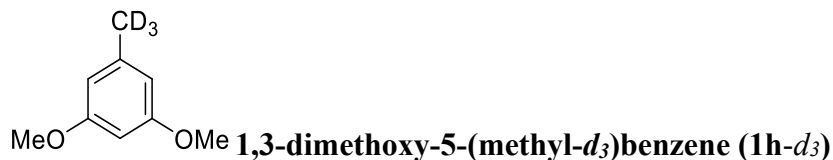

Prepared according to the general procedure **Condition B**, T = 30 °C, t = 6 h. Purification was performed by flash column chromatography (PE/EA/DCM = 20:1:1), 75.1 mg, 97% yield, 98% D-rate. Colorless oil liquid. <sup>1</sup>H NMR (400 MHz, CDCl<sub>3</sub>): δ 6.36-6.35 (m, 2H, *Ar* C-H), 6.31-6.30 (m, 1H, *Ar* C-H), 3.79 (s, 6H, OCH<sub>3</sub>), 2.30-2.28 (m, 0.06H, 98% D, benzylic CH). <sup>13</sup>C{<sup>1</sup>H} NMR (100 MHz, CDCl<sub>3</sub>): δ 160.8, 140.2, 107.2, 97.6, 55.3, 21.5-20.7 (m). <sup>2</sup>H NMR (92 MHz, MeCN): δ 3.97. HRMS (EI) m/z: [M]<sup>+</sup> calcd for C<sub>9</sub>H<sub>9</sub>D<sub>3</sub>O<sub>2</sub><sup>+</sup> 155.1020; found 155.1019.

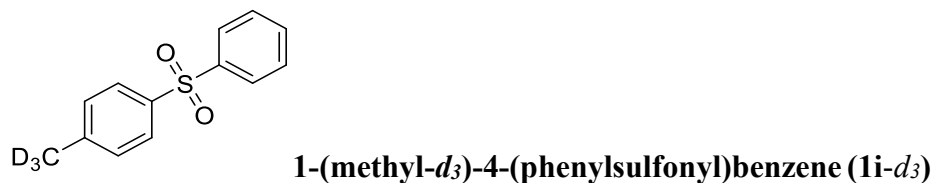

Prepared according to the general procedure **Condition A**, T = 110 °C, t = 6 h. Purification was performed by flash column chromatography (PE/EA/DCM = 5:1:1), 110.2 mg, 94% yield, 97% D-rate. **Condition B**, T = 30 °C, t = 6 h. Purification was performed by flash column chromatography (PE/EA/DCM = 5:1:1), 112.1 mg, 95% yield, 97% D-rate. White solid (m.p. 116-118 °C). <sup>1</sup>H NMR (400 MHz, CDCl<sub>3</sub>): δ 7.94-7.91 (m, 2H, *Ar* C-H), 7.84-7.81 (m, 2H, *Ar* C-H), 7.56-7.52 (m, 1H, *Ar* C-H), 7.50-7.46 (m, 2H, *Ar* C-H), 7.30-7.28 (m, 2H, *Ar* C-H), 2.36-2.35 (m, 0.08H, 97% D, benzylic CH). <sup>13</sup>C{<sup>1</sup>H} NMR (100 MHz, CDCl<sub>3</sub>): δ 144.2, 142.1, 142.0, 138.8, 138.7, 133.1, 130.0, 129.9, 129.3, 129.2, 127.8, 127.6, 21.3-20.5 (m). <sup>2</sup>H NMR (92 MHz, MeCN): δ 4.12. HRMS (ESI-TOF) m/z: [M+H]<sup>+</sup> calcd for C<sub>13</sub>H<sub>9</sub>D<sub>3</sub>O<sub>2</sub>S<sup>+</sup> 236.0819; found 236.0822.

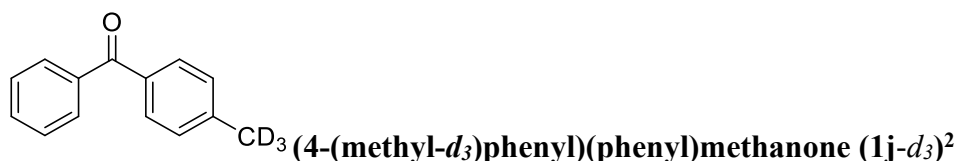

Prepared according to the general procedure **Condition A**, T = 30 °C, t = 6 h. Purification was performed by flash column chromatography (PE/EA/DCM = 20:1:1), 91.3 mg, 92% yield, 96% D-rate. **Condition B**, T = 30 °C, t = 6 h. Purification was performed by flash column chromatography (PE/EA/DCM = 20:1:1), 92.7 mg, 93% yield, 97% D-rate. Colorless oil liquid.  $^1\text{H}$  NMR (400 MHz,  $\text{CDCl}_3$ ):  $\delta$  7.80-7.77 (m, 2H, *Ar* C-H), 7.74-7.71 (m, 2H, *Ar* C-H), 7.60-7.55 (m, 1H, *Ar* C-H), 7.50-7.45 (m, 2H, *Ar* C-H), 7.30-7.27 (m, 2H, *Ar* C-H), 2.42-2.41 (m, 0.11H, 96% D, benzylic CH).  $^{13}\text{C}\{^1\text{H}\}$  NMR (100 MHz,  $\text{CDCl}_3$ ):  $\delta$  196.6, 143.2, 138.0, 135.0, 132.3, 130.4, 130.0, 129.1, 128.3, 21.3-20.5 (m).  $^2\text{H}$  NMR (92 MHz, MeCN):  $\delta$  4.15.

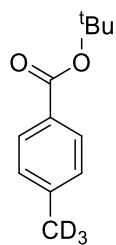

**tert-butyl 4-(methyl- $d_3$ )benzoate (1k- $d_3$ )**

Prepared according to the general procedure **Condition B**, T = 30 °C,  $^t\text{BuOK}$  (30mol%), t = 6 h. Purification was performed by flash column chromatography (PE/EA/DCM = 20:1:1), 70.3 mg, 72% yield, 98% D-rate. Colorless oil liquid.  $^1\text{H}$  NMR (400 MHz,  $\text{CDCl}_3$ ):  $\delta$  7.90-7.87 (m, 2H, *Ar* C-H), 7.22-7.19 (m, 2H, *Ar* C-H), 2.37-2.36 (m, 0.05H, 98% D, benzylic CH), 1.59 (s, 9H,  $\text{CH}_3$ ).  $^{13}\text{C}\{^1\text{H}\}$  NMR (100 MHz,  $\text{CDCl}_3$ ):  $\delta$  166.0, 143.0, 129.5, 129.4, 129.0, 80.8, 28.3, 20.9-20.3 (m).  $^2\text{H}$  NMR (92 MHz, MeCN):  $\delta$  4.11. HRMS (EI) m/z:  $[\text{M}]^+$  calcd for  $\text{C}_{12}\text{H}_{13}\text{D}_3\text{O}_2^+$  195.1333; found 195.1333.

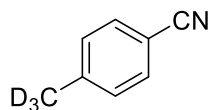

**4-(methyl- $d_3$ )benzonitrile (1l- $d_3$ )**

Prepared according to the general procedure **Condition A**, T = 30 °C, t = 6 h. Purification was performed by flash column chromatography (PE/EA/DCM = 20:1:1), 34.3 mg, 57% yield, 98% D-rate. Yellow oil liquid.  $^1\text{H}$  NMR (400 MHz,  $\text{CDCl}_3$ ):  $\delta$  7.55-7.53 (m, 2H, *Ar* C-H), 7.28-7.26 (m, 2H, *Ar* C-H), 2.40-2.38 (m, 0.06H, 98% D, benzylic CH).  $^{13}\text{C}\{^1\text{H}\}$  NMR (100 MHz,  $\text{CDCl}_3$ ):  $\delta$  143.7, 132.2, 130.0, 119.3, 109.5, 21.4-21.0 (m).  $^2\text{H}$  NMR (92 MHz, MeCN):  $\delta$  3.37. HRMS (EI) m/z:  $[\text{M}]^+$  calcd for  $\text{C}_8\text{H}_4\text{D}_3\text{N}^+$  120.0761; found 120.0761.

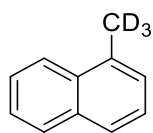

**1-(methyl- $d_3$ )naphthalene (1m- $d_3$ )<sup>3</sup>**

Prepared according to the general procedure **Condition A**, t = 110 °C, T = 6 h. Purification was performed by flash column chromatography (PE), 64.7 mg, 91% yield, 98% D-rate. **Condition B**, T = 50 °C, t = 6 h. Purification was performed by flash column chromatography (PE), 70.2 mg, 97% yield, 96% D-rate. Colorless oil liquid.  $^1\text{H}$  NMR (400 MHz,  $\text{CDCl}_3$ ):  $\delta$  8.03 (d,  $J$  = 8.08 Hz, 1H, *Ar* C-H), 7.89 (d,  $J$  = 8.16 Hz, 1H, *Ar* C-H), 7.75 (d,  $J$  = 8.12 Hz, 1H, *Ar* C-H), 7.58-7.51 (m, 2H, *Ar* C-H), 7.44-7.40 (m, 1H,

*Ar* C-H), 7.36-7.35 (m, 1H, *Ar* C-H), 2.71-2.70 (m, 0.06H, 98% D, benzylic *CH*).  $^{13}\text{C}\{^1\text{H}\}$  NMR (100 MHz,  $\text{CDCl}_3$ ):  $\delta$  134.3, 133.6, 132.7, 128.6, 126.7, 126.5, 125.8, 125.7, 125.7, 124.2, 18.9-18.4 (m).  $^2\text{H}$  NMR (92 MHz, MeCN):  $\delta$  4.39.

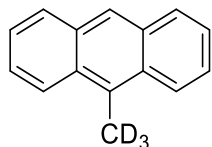

**9-(methyl- $d_3$ )anthracene (1n- $d_3$ )**

Prepared according to the general procedure **Condition B**,  $T = 50\text{ }^\circ\text{C}$ ,  $t = 6\text{ h}$ . Purification was performed by flash column chromatography (PE), 80.2 mg, 82% yield, 98% D-rate. Yellow solid (m.p. 67-69  $^\circ\text{C}$ ).  $^1\text{H}$  NMR (400 MHz,  $\text{CDCl}_3$ ):  $\delta$  8.35 (s, 1H, *Ar* C-H), 8.30 (d,  $J = 8.6\text{ Hz}$ , 2H, *Ar* C-H), 8.02 (d,  $J = 7.88\text{ Hz}$ , 2H, *Ar* C-H), 7.55-7.46 (m, 4H, *Ar* C-H), 3.08-3.07 (m, 0.05H, 98% D, benzylic *CH*).  $^{13}\text{C}\{^1\text{H}\}$  NMR (100 MHz,  $\text{CDCl}_3$ ):  $\delta$  131.6, 130.3, 130.2, 129.2, 125.4, 125.4, 124.9, 124.8, 13.6-12.9 (m).  $^2\text{H}$  NMR (92 MHz, MeCN):  $\delta$  4.80. HRMS (EI)  $m/z$ :  $[\text{M}]^+$  calcd for  $\text{C}_{15}\text{H}_9\text{D}_3^+$  195.1122; found 195.1119.

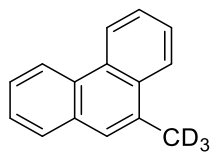

**9-(methyl- $d_3$ )phenanthrene (1o- $d_3$ )**

Prepared according to the general procedure **Condition A**,  $T = 110\text{ }^\circ\text{C}$ ,  $t = 6\text{ h}$ . Purification was performed by flash column chromatography (PE), 96.9 mg, 99% yield, 99% D-rate. **Condition B**,  $T = 50\text{ }^\circ\text{C}$ ,  $t = 6\text{ h}$ . Purification was performed by flash column chromatography (PE), 91.7 mg, 94% yield, 98% D-rate. White solid (m.p. 82-84  $^\circ\text{C}$ ).  $^1\text{H}$  NMR (400 MHz,  $\text{CDCl}_3$ ):  $\delta$  8.75-8.72 (m, 1H, *Ar* C-H), 8.68-8.66 (m, 1H, *Ar* C-H), 8.08-8.05 (m, 1H, *Ar* C-H), 7.83-7.81 (m, 1H, *Ar* C-H), 7.70-7.63 (m, 2H, *Ar* C-H), 7.63-7.56 (m, 3H, *Ar* C-H), 2.72-2.72 (m, 0.06H, 98% D, benzylic *CH*).  $^{13}\text{C}\{^1\text{H}\}$  NMR (100 MHz,  $\text{CDCl}_3$ ):  $\delta$  132.5, 132.2, 132.1, 130.5, 129.8, 128.0, 126.9, 126.7, 126.6, 126.3, 125.9, 124.8, 123.1, 122.6, 19.6-19.2 (m).  $^2\text{H}$  NMR (92 MHz, DCM):  $\delta$  3.65. HRMS (EI)  $m/z$ :  $[\text{M}]^+$  calcd for  $\text{C}_{15}\text{H}_9\text{D}_3^+$  195.1122; found 195.1118.

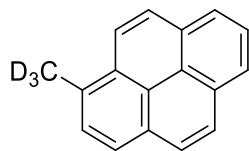

**8-(methyl- $d_3$ )-1,9-dihydropyrene (1p- $d_3$ )**

Prepared according to the general procedure **Condition B**,  $T = 50\text{ }^\circ\text{C}$ ,  $t = 6\text{ h}$ . Purification was performed by flash column chromatography (PE), 107.7 mg, 97% yield, 98% D-rate. White solid (m.p. 58-60  $^\circ\text{C}$ ).  $^1\text{H}$  NMR (400 MHz,  $\text{CDCl}_3$ ):  $\delta$  8.26-8.24 (m, 1H, *Ar* C-H), 8.21-8.18 (m, 1H, *Ar* C-H), 8.18-8.16 (m, 1H, *Ar* C-H), 8.13-8.09 (m, 2H, *Ar* C-H), 8.05-7.98 (m, 3H, *Ar* C-H), 7.88-7.87 (m, 1H, *Ar* C-H), 2.97-2.95 (m, 0.06H, 98% D, benzylic *CH*).  $^{13}\text{C}\{^1\text{H}\}$  NMR (100 MHz,  $\text{CDCl}_3$ ):  $\delta$  132.3, 131.6, 131.1, 129.9, 129.4, 128.0, 127.7, 127.2, 126.6, 125.9, 125.1, 125.0, 124.9, 124.9, 124.9, 124.8, 123.8.  $^2\text{H}$  NMR (92 MHz,

DCM):  $\delta$  3.87. HRMS (EI)  $m/z$ :  $[M]^+$  calcd for  $C_{17}H_9D_3^+$  219.1122; found 219.1120.

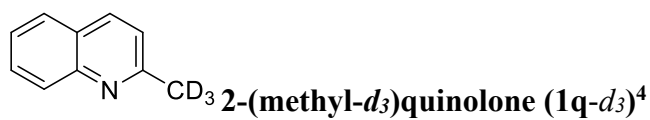

Prepared according to the general procedure **Condition B**,  $T = 30\text{ }^\circ\text{C}$ ,  $t\text{-BuOK}$  (5mol%),  $t = 3\text{ h}$ . Purification was performed by flash column chromatography (PE/EA/DCM = 3:1:1), 54.5 mg, 74% yield, 98% D-rate. Yellow oil liquid.  $^1\text{H NMR}$  (400 MHz,  $\text{CDCl}_3$ ):  $\delta$  8.03-7.99 (m, 2H, *Ar C-H*), 7.76-7.74 (m, 1H, *Ar C-H*), 7.68-7.64 (m, 1H, *Ar C-H*), 7.48-7.43 (m, 1H, *Ar C-H*), 7.27-7.23 (m, 0.98H, *Ar C-H*), 2.70-2.69 (m, 0.07H, 98% D, benzylic *CH*).  $^{13}\text{C}\{^1\text{H}\}$  NMR (100 MHz,  $\text{CDCl}_3$ ):  $\delta$  159.0, 147.8, 136.2, 129.5, 128.6, 127.5, 126.5, 125.7, 122.1, 24.8-24.4 (m).  $^2\text{H NMR}$  (92 MHz, MeCN):  $\delta$  4.94.

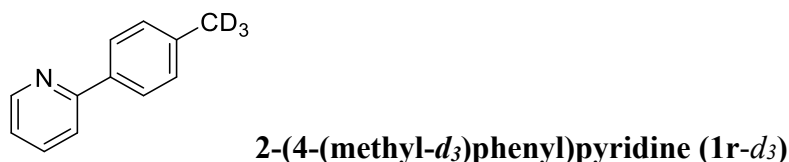

Prepared according to the general procedure **Condition B**,  $T = 30\text{ }^\circ\text{C}$ ,  $t = 6\text{ h}$ . Purification was performed by flash column chromatography (PE/EA/DCM = 5:1:1), 86.7 mg, 100% yield, 97% D-rate. Colorless oil liquid.  $^1\text{H NMR}$  (400 MHz,  $\text{CDCl}_3$ ):  $\delta$  8.69-8.67 (m, 1H, *Ar C-H*), 7.91-7.88 (m, 2H, *Ar C-H*), 7.75-7.69 (m, 2H, *Ar C-H*), 7.30-7.27 (m, 2H, *Ar C-H*), 7.22-7.19 (m, 1H, *Ar C-H*), 2.41-2.37 (m, 0.10H, 97% D, benzylic *CH*).  $^{13}\text{C}\{^1\text{H}\}$  NMR (100 MHz,  $\text{CDCl}_3$ ):  $\delta$  157.6, 149.7, 139.0, 136.8, 136.7, 129.6, 126.9, 121.9, 120.4, 21.2-20.2 (m).  $^2\text{H NMR}$  (92 MHz, MeCN):  $\delta$  4.03. HRMS (ESI-TOF)  $m/z$ :  $[M+H]^+$  calcd for  $C_{12}H_9D_3N^+$  173.1153; found 173.1153.

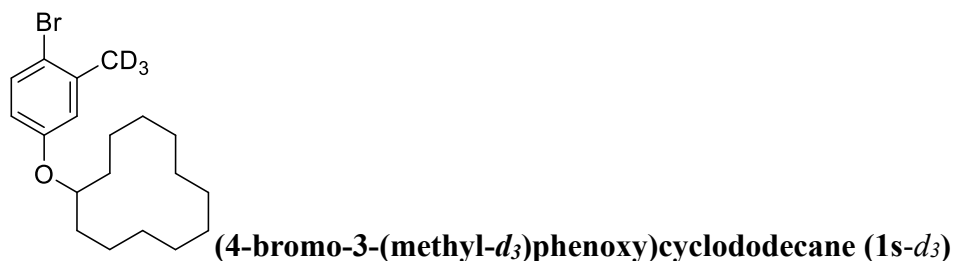

Prepared according to the general procedure **Condition A**,  $t = 110\text{ }^\circ\text{C}$ ,  $T = 6\text{ h}$ . Purification was performed by flash column chromatography (PE), 178.6 mg, 100% yield, 98% D-rate. **Condition B**,  $T = 70\text{ }^\circ\text{C}$ ,  $t = 6\text{ h}$ . Purification was performed by flash column chromatography (PE), 162.1 mg, 91% yield, 98% D-rate. White solid (m.p. 58-60  $^\circ\text{C}$ ).  $^1\text{H NMR}$  (400 MHz,  $\text{CDCl}_3$ ):  $\delta$  7.37 (d,  $J = 8.72\text{ Hz}$ , 1H, *Ar C-H*), 6.78 (d,  $J = 2.72\text{ Hz}$ , 1H, *Ar C-H*), 6.60 (dd,  $J = 8.64, 2.8\text{ Hz}$ , 1H, *Ar C-H*), 4.39-4.33 (m, 1H, *CH*), 2.32 (s, 0.07H, 98% D, benzylic *CH*), 1.81-1.72 (m, 2H, *CH}\_2*), 1.65-1.58 (m, 2H, *CH}\_2*), 1.45-1.27 (m, 18H, *CH}\_2*).  $^{13}\text{C}\{^1\text{H}\}$  NMR (100 MHz,  $\text{CDCl}_3$ ):  $\delta$  157.6, 138.8, 132.9, 118.9, 115.2, 114.8, 75.8, 28.7, 24.7, 24.4, 23.3, 23.2, 20.8.  $^2\text{H NMR}$  (92 MHz, DCM):  $\delta$  3.72. HRMS (EI)  $m/z$ :  $[M]^+$  calcd for  $C_{19}H_{26}D_3OBr^+$  355.1585; found 355.1585.



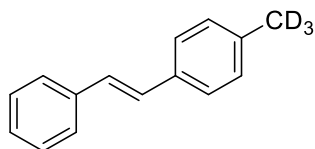

**(E)-1-(methyl-*d*<sub>3</sub>)-4-styrylbenzene (1t-*d*<sub>3</sub>)**

Prepared according to the general procedure **Condition A**,  $t = 110\text{ }^{\circ}\text{C}$ ,  $T = 6\text{ h}$ . Purification was performed by flash column chromatography (PE), 87.6 mg, 89% yield, 98% D-rate. **Condition B**,  $T = 30\text{ }^{\circ}\text{C}$ ,  $t = 6\text{ h}$ . Purification was performed by flash column chromatography (PE), 87.0 mg, 88% yield, 98% D-rate. White solid (m.p.  $105\text{-}107\text{ }^{\circ}\text{C}$ ).  $^1\text{H NMR}$  (500 MHz,  $\text{CDCl}_3$ )  $\delta$  7.53-7.50 (m, 2H, *Ar* C-H), 7.47-7.42 (m, 2H, *Ar* C-H), 7.38-7.34 (m, 2H, *Ar* C-H), 7.31-7.21 (m, 1H, *Ar* C-H), 7.19-7.17 (m, 2H, *Ar* C-H), 7.13-7.04 (m, 2H, C=CH), 2.34 (s, 0.06H, 98% D, benzylic CH).  $^{13}\text{C}\{^1\text{H}\}$  NMR (125 MHz,  $\text{CDCl}_3$ )  $\delta$  137.6, 137.6, 134.7, 129.5, 128.8, 128.8, 127.8, 127.5, 126.6, 126.5.  $^2\text{H NMR}$  (92 MHz, DCM):  $\delta$  4.85. HRMS (EI)  $m/z$ :  $[\text{M}]^+$  calcd for  $\text{C}_{15}\text{H}_{11}\text{D}_3^+$  197.1278; found 197.1276.

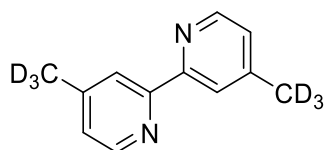

**4,4'-bis(methyl-*d*<sub>3</sub>)-2,2'-bipyridine (1u-*d*<sub>6</sub>)<sup>5</sup>**

Prepared according to the general procedure **Condition A**,  $T = 110\text{ }^{\circ}\text{C}$ ,  $t = 6\text{ h}$ . Purification was performed by flash column chromatography (EA), 91.0 mg, 96% yield, 96% D-rate. **Condition B**,  $T = 90\text{ }^{\circ}\text{C}$ ,  $t = 6\text{ h}$ . Purification was performed by flash column chromatography (EA), 88.9 mg, 93% yield, 96% D-rate. White solid.  $^1\text{H NMR}$  (400 MHz,  $\text{CDCl}_3$ ):  $\delta$  8.54-8.52 (m, 2H, *Ar* C-H), 8.22-8.22 (m, 2H, *Ar* C-H), 7.13-7.12 (m, 2H, *Ar* C-H), 2.41-2.39 (m, 0.27H, 96% D, benzylic CH).  $^{13}\text{C}\{^1\text{H}\}$  NMR (100 MHz,  $\text{CDCl}_3$ ):  $\delta$  156.1, 149.0, 148.1, 124.8, 122.1, 20.7-20.3 (m).  $^2\text{H NMR}$  (92 MHz, DCM):  $\delta$  4.09.

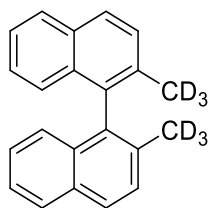

**2,2'-bis(methyl-*d*<sub>3</sub>)-1,1'-binaphthalene (1v-*d*<sub>6</sub>)**

Prepared according to the general procedure **Condition B**,  $T = 30\text{ }^{\circ}\text{C}$ ,  $t = 6\text{ h}$ . Purification was performed by flash column chromatography (PE), 144.3 mg, 100% yield, 96% D-rate. White solid (m.p.  $75\text{-}77\text{ }^{\circ}\text{C}$ ).  $^1\text{H NMR}$  (400 MHz,  $\text{CDCl}_3$ ):  $\delta$  7.91-7.88 (m, 4H, *Ar* C-H), 7.53-7.51 (m, 2H, *Ar* C-H), 7.42-7.38 (m, 2H, *Ar* C-H), 7.26-7.19 (m, 2H, *Ar* C-H), 7.07-7.05 (m, 2H, *Ar* C-H), 2.02-2.01 (m, 0.24H, 96% D, benzylic CH).  $^{13}\text{C}\{^1\text{H}\}$  NMR (100 MHz,  $\text{CDCl}_3$ ):  $\delta$  135.3, 134.3, 132.9, 132.3, 128.8, 128.1, 127.6, 126.2, 125.8, 125.0, 19.8-19.0 (m).  $^2\text{H NMR}$  (92 MHz, DCM):  $\delta$  2.99. HRMS (EI)  $m/z$ :  $[\text{M}]^+$  calcd for  $\text{C}_{22}\text{H}_{12}\text{D}_6^+$  288.1780; found 288.1778.

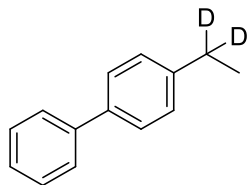

**4-(ethyl-1,1- $d_2$ )-1,1'-biphenyl (1w- $d_2$ )<sup>6</sup>**

Prepared according to the general procedure **Condition A**, T = 110 °C, t = 6 h. Purification was performed by flash column chromatography (PE), 91.6 mg, 99% yield, 86% D-rate. **Condition B**, T = 30 °C, t = 6 h. Purification was performed by flash column chromatography (PE), 92.1 mg, 100% yield, 99% D-rate. Colorless oil liquid. <sup>1</sup>H NMR (400 MHz, CDCl<sub>3</sub>): δ 7.61-7.59 (m, 2H, *Ar* C-H), 7.55-7.53 (m, 2H, *Ar* C-H), 7.46-7.42 (m, 2H, *Ar* C-H), 7.36-7.32 (m, 1H, *Ar* C-H), 7.30-7.28 (m, 2H, *Ar* C-H), 2.72-2.68 (m, 0.03H, 99% D, benzylic CH), 1.28 (s, 3H, CH<sub>3</sub>). <sup>13</sup>C{<sup>1</sup>H} NMR (100 MHz, CDCl<sub>3</sub>): δ 143.5, 141.3, 138.8, 128.8, 128.4, 127.2, 127.2, 127.1, 28.2-27.8 (m), 15.6. <sup>2</sup>H NMR (92 MHz, MeCN): δ 4.94.

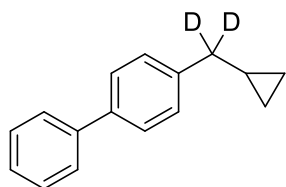

**4-(cyclopropylmethyl- $d_2$ )-1,1'-biphenyl (1x- $d_2$ )**

Prepared according to the general procedure **Condition A**, T = 110 °C, t = 6 h. Purification was performed by flash column chromatography (PE), 105.9 mg, 100% yield, 98% D-rate. **Condition B**, T = 30 °C, t = 6 h. Purification was performed by flash column chromatography (PE), 105.4 mg, 100% yield, 97% D-rate. Colorless oil liquid. <sup>1</sup>H NMR (400 MHz, CDCl<sub>3</sub>): δ 7.63-7.60 (m, 2H, *Ar* C-H), 7.56-7.54 (m, 2H, *Ar* C-H), 7.47-7.44 (m, 2H, *Ar* C-H), 7.37-7.33 (m, 3H, *Ar* C-H), 2.63-2.59 (m, 0.06H, 98% D, benzylic CH), 1.06-1.03 (m, 1H, CH), 0.60-0.55 (m, 2H, CH<sub>2</sub>), 0.28-0.24 (m, 2H, CH<sub>2</sub>). <sup>13</sup>C{<sup>1</sup>H} NMR (100 MHz, CDCl<sub>3</sub>): δ 141.4, 141.3, 139.0, 128.9, 128.8, 127.2, 127.2, 127.1, 39.6-39.2 (m), 11.9, 4.8. <sup>2</sup>H NMR (92 MHz, MeCN): δ 4.93. HRMS (EI) m/z: [M]<sup>+</sup> calcd for C<sub>16</sub>H<sub>14</sub>D<sub>2</sub><sup>+</sup> 210.1372; found 210.1371.

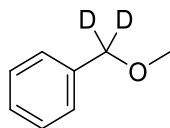

**(methoxymethyl- $d_2$ )benzene (1y- $d_2$ )**

Prepared according to the general procedure **Condition B**, T = 50 °C, t = 6 h. Purification was performed by flash column chromatography (PE/EA/DCM = 10:1:1), 34.0 mg, 55% yield (GC: 99%), 99% D-rate. Yellow oil liquid. <sup>1</sup>H NMR (400 MHz, CDCl<sub>3</sub>): δ 7.38-7.30 (m, 5H, *Ar* C-H), 4.45-4.45 (m, 0.03H, 99% D, benzylic CH), 3.40-3.39 (m, 3H, OCH<sub>3</sub>). <sup>13</sup>C{<sup>1</sup>H} NMR (100 MHz, CDCl<sub>3</sub>): δ 138.2, 128.5, 127.9, 127.8, 74.3-73.6 (m), 58.1. <sup>2</sup>H NMR (92 MHz, DCM): δ 5.12. HRMS (EI) m/z: [M]<sup>+</sup> calcd for C<sub>8</sub>H<sub>8</sub>D<sub>2</sub>O<sup>+</sup> 124.0852; found 124.0850.

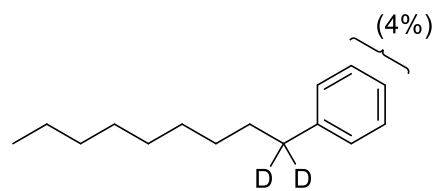

**(nonyl-1,1-*d*<sub>2</sub>)benzene (1z-*d*<sub>2</sub>)**

Prepared according to the general procedure **Condition B**,  $T = 90\text{ }^{\circ}\text{C}$ ,  $t = 6\text{ h}$ . Purification was performed by flash column chromatography (PE), 102.1 mg, 99% yield, 98% D-rate. Colorless oil liquid.  $^1\text{H}$  NMR (400 MHz,  $\text{CDCl}_3$ ):  $\delta$  7.29-7.26 (m, 2H, *Ar* C-H), 7.19-7.15 (m, 2.88H, *Ar* C-H), 2.60-2.56 (m, 0.03H, 98% D, benzylic *CH*), 1.60-1.58 (m, 2H, *CH*<sub>2</sub>), 1.32-1.26 (m, 12H, *CH*<sub>2</sub>), 0.90-0.86 (m, 3H, *CH*<sub>3</sub>).  $^{13}\text{C}\{^1\text{H}\}$  NMR (100 MHz,  $\text{CDCl}_3$ ):  $\delta$  143.0, 128.5, 128.4, 125.7, 35.8-35.2 (m), 32.1, 31.5, 29.7, 29.7, 29.5, 29.4, 22.8, 14.3.  $^2\text{H}$  NMR (92 MHz, MeCN):  $\delta$  4.94. HRMS (EI)  $m/z$ :  $[\text{M}]^+$  calcd for  $\text{C}_{15}\text{H}_{22}\text{D}_2^+$  206.1998; found 206.1997.

### 3. References

1. McLaughlin, M.-G.; McAdam, C.-A.; Cook, M.-J. MIDA–Vinylsilanes: Selective Cross-Couplings and Applications to the Synthesis of Functionalized Stilbenes. *Org. Lett.* **2015**, *17*, 10-13.
2. Komeyama, K.; Yamahata, Y.; Osaka, I. Nickel and Nucleophilic Cobalt–Catalyzed Trideuteriomethylation of Aryl Halides Using Trideuteriomethyl *p*-Toluenesulfonate. *Org. Lett.* **2018**, *20*, 4375–4378.
3. Qin, G.-P.; Wang, Y.; Huang, H.-M. Copper-Catalyzed Dehydrogenative Formal [4 + 2] and [3 + 2] Cycloadditions of Methylnaphthalenes and Electron-Deficient Alkenes. *Org. Lett.* **2017**, *19*, 6352-6355.
4. Liu, M.; Chen, X.; Chen, T.; Yin, S.-F. A facile and general acid-catalyzed deuteration at methyl groups of *N*-heteroarylmethanes. *Org. Biomol. Chem.* **2017**, *15*, 2507–2511.
5. Neranon, K.; Ramström, O. Rapid, regioselective deuteration of dimethyl-2,2'-bipyridines via microwave-assistance. *RSC Adv.* **2015**, *5*, 2684-2688.
6. Modvig, A.; Andersen, T. L.; Taaning, R. H.; Lindhardt, A. T.; Skrydstrup, T. Two-Chamber Hydrogen Generation and Application: Access to Pressurized Deuterium Gas. *J. Org. Chem.* **2014**, *79*, 5861–5868.

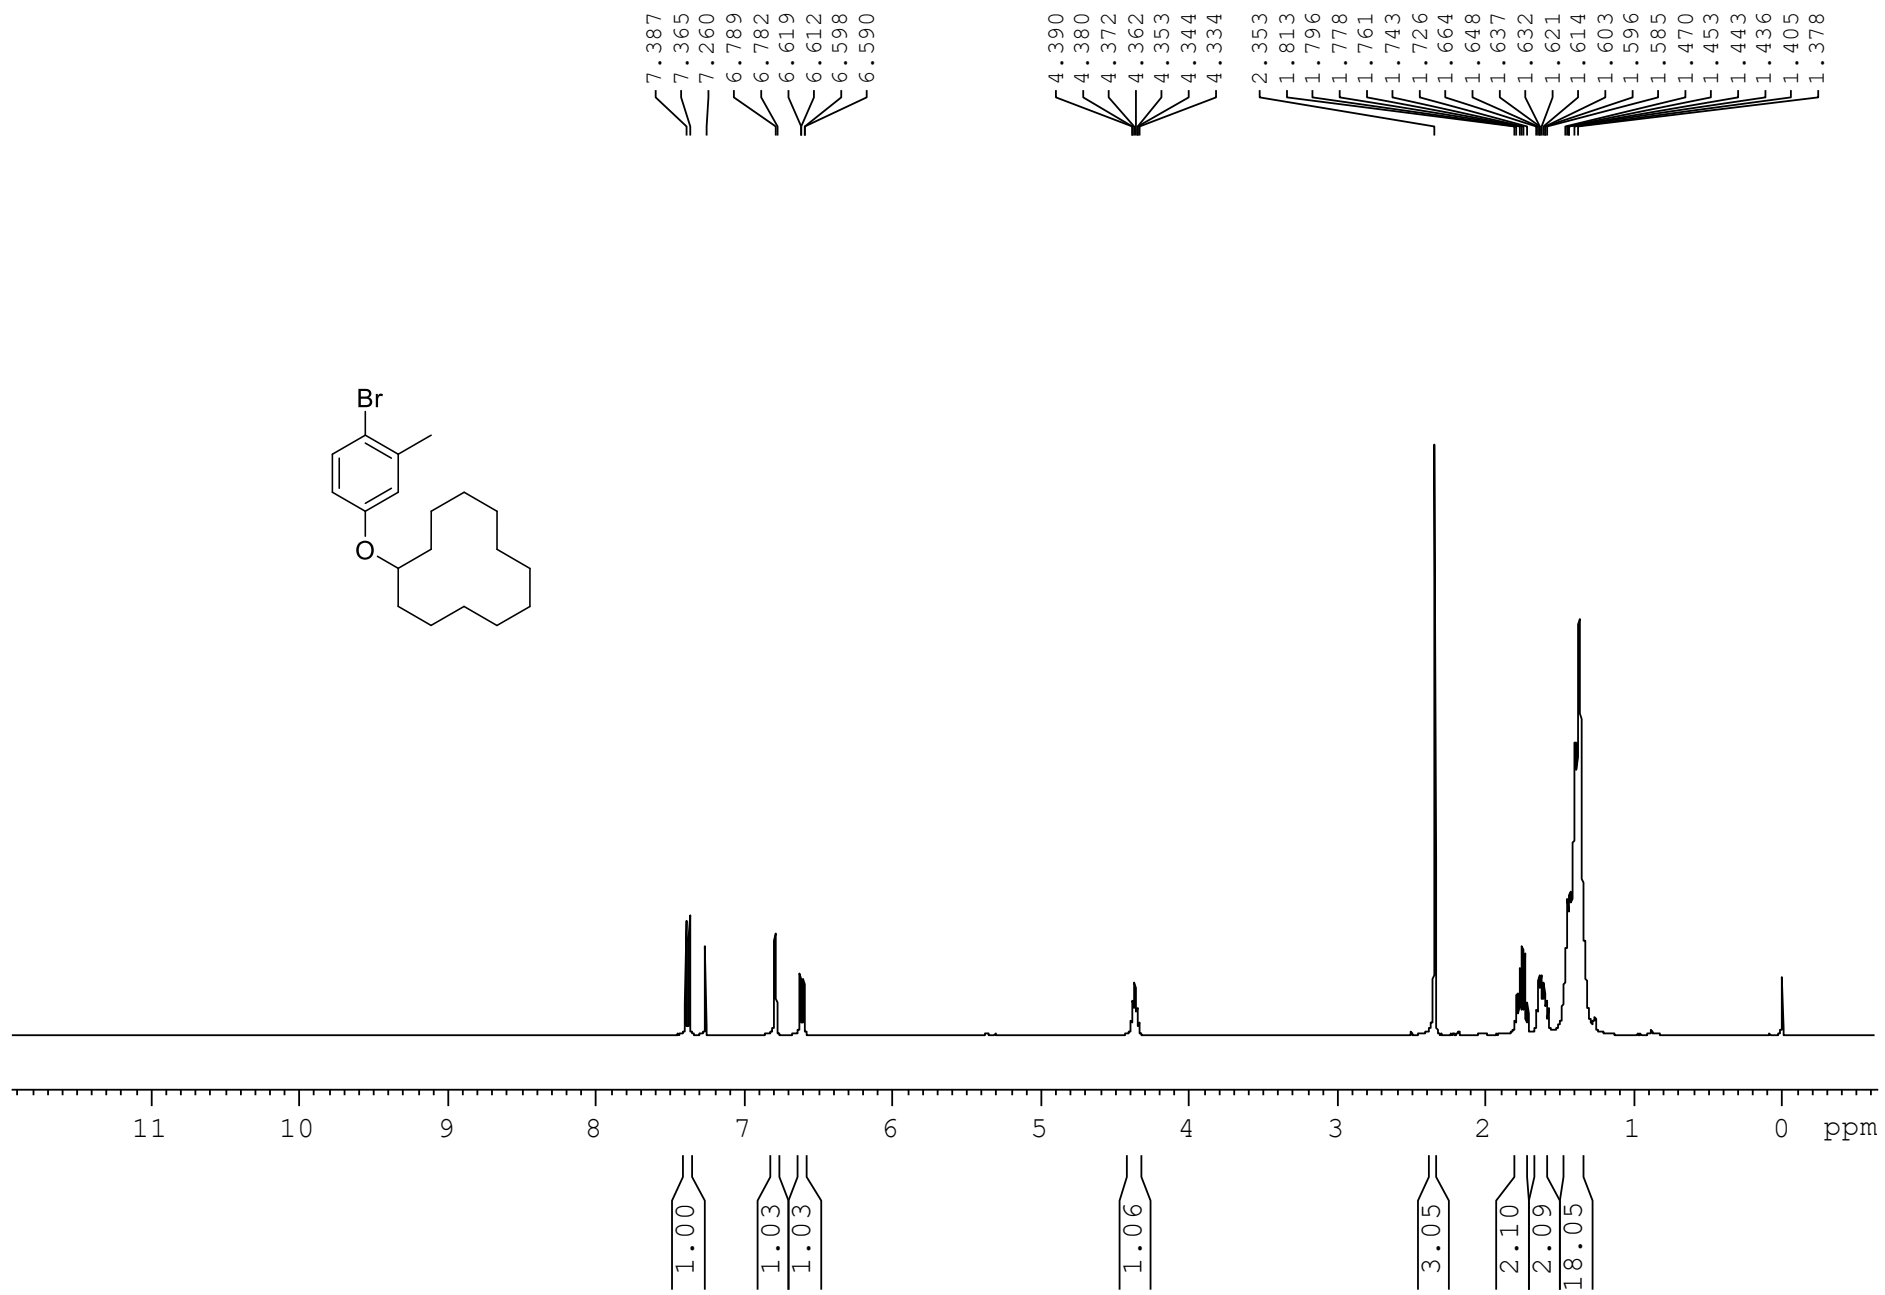

Figure S1. <sup>1</sup>H NMR spectra of S1 (CDCl<sub>3</sub>, 400 M)

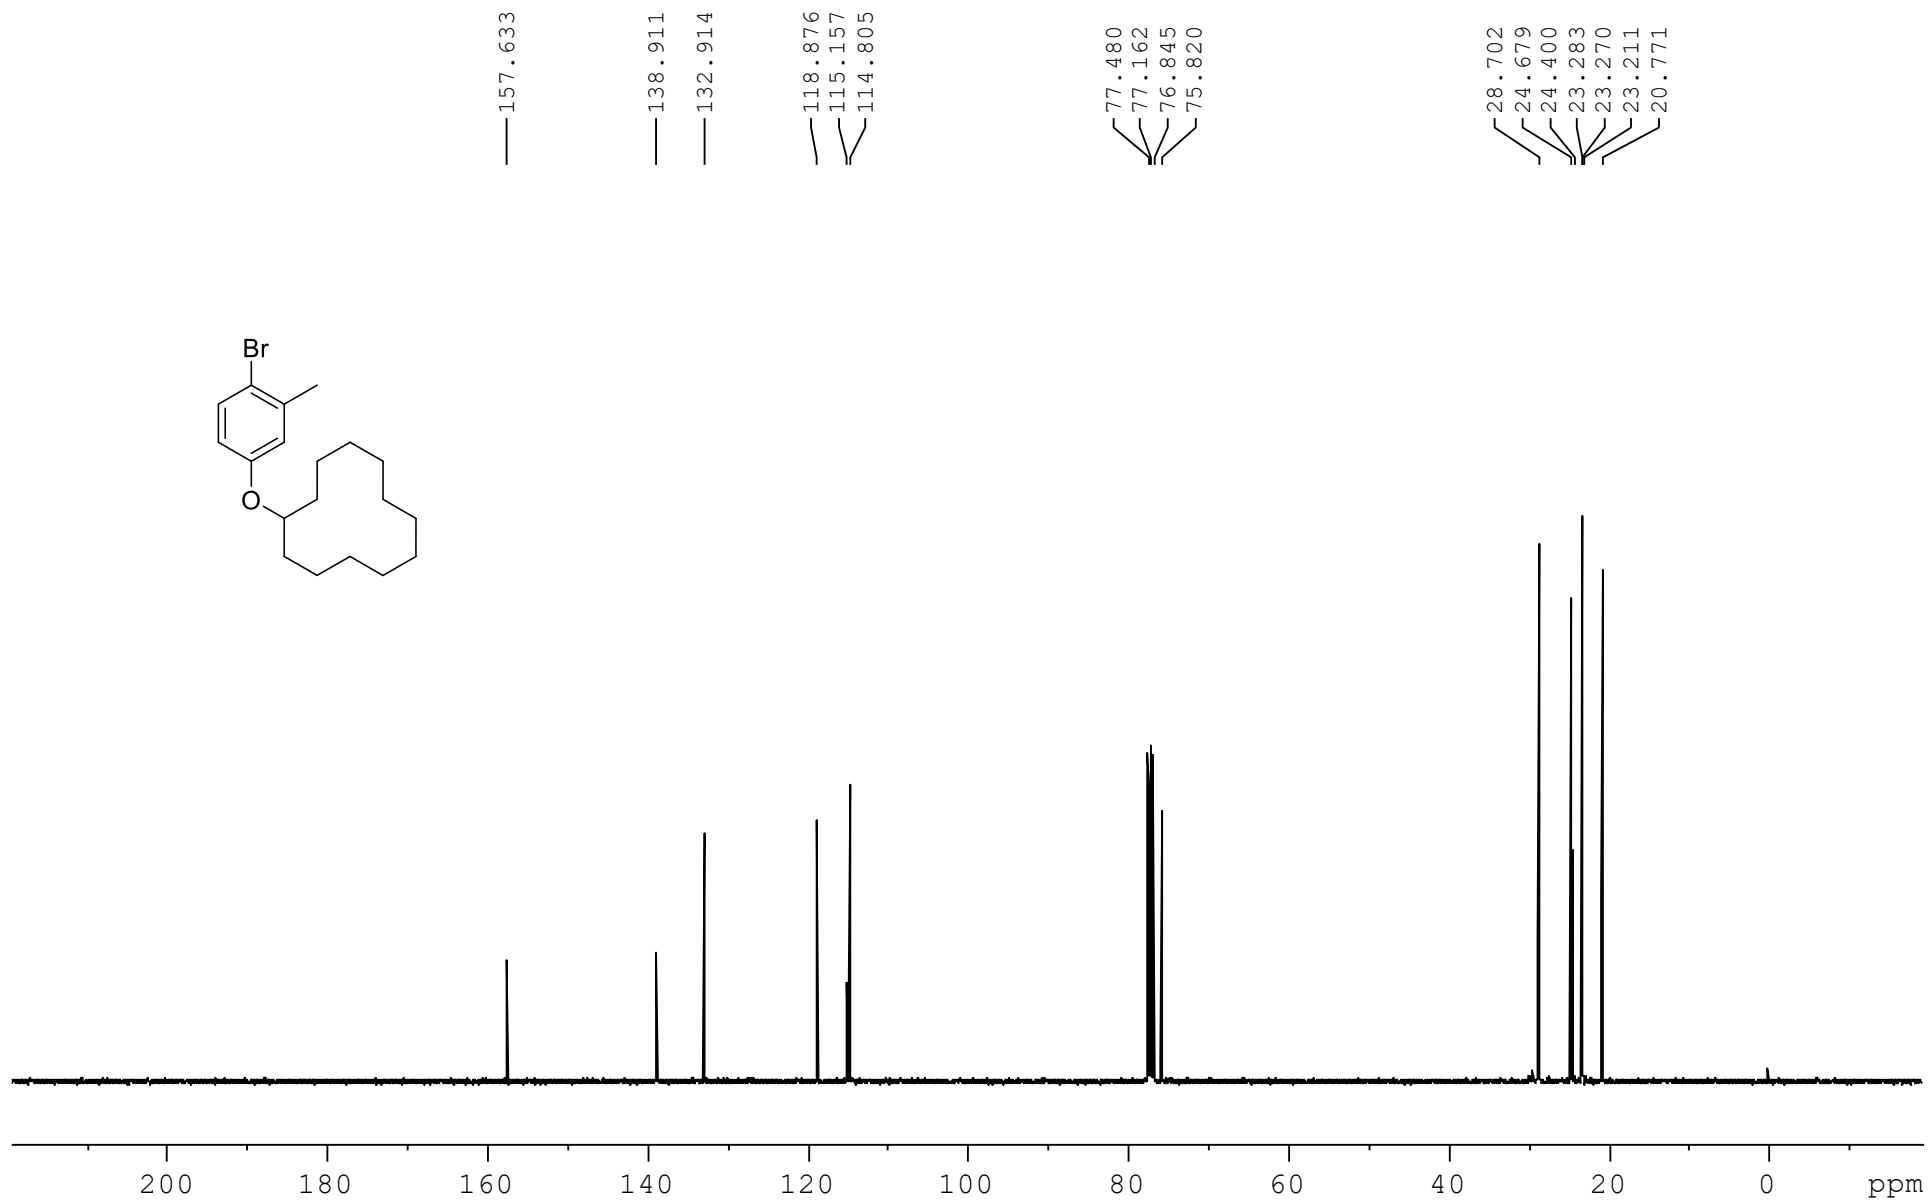

Figure S2. <sup>13</sup>C NMR spectra of S1 (CDCl<sub>3</sub>, 100 M)

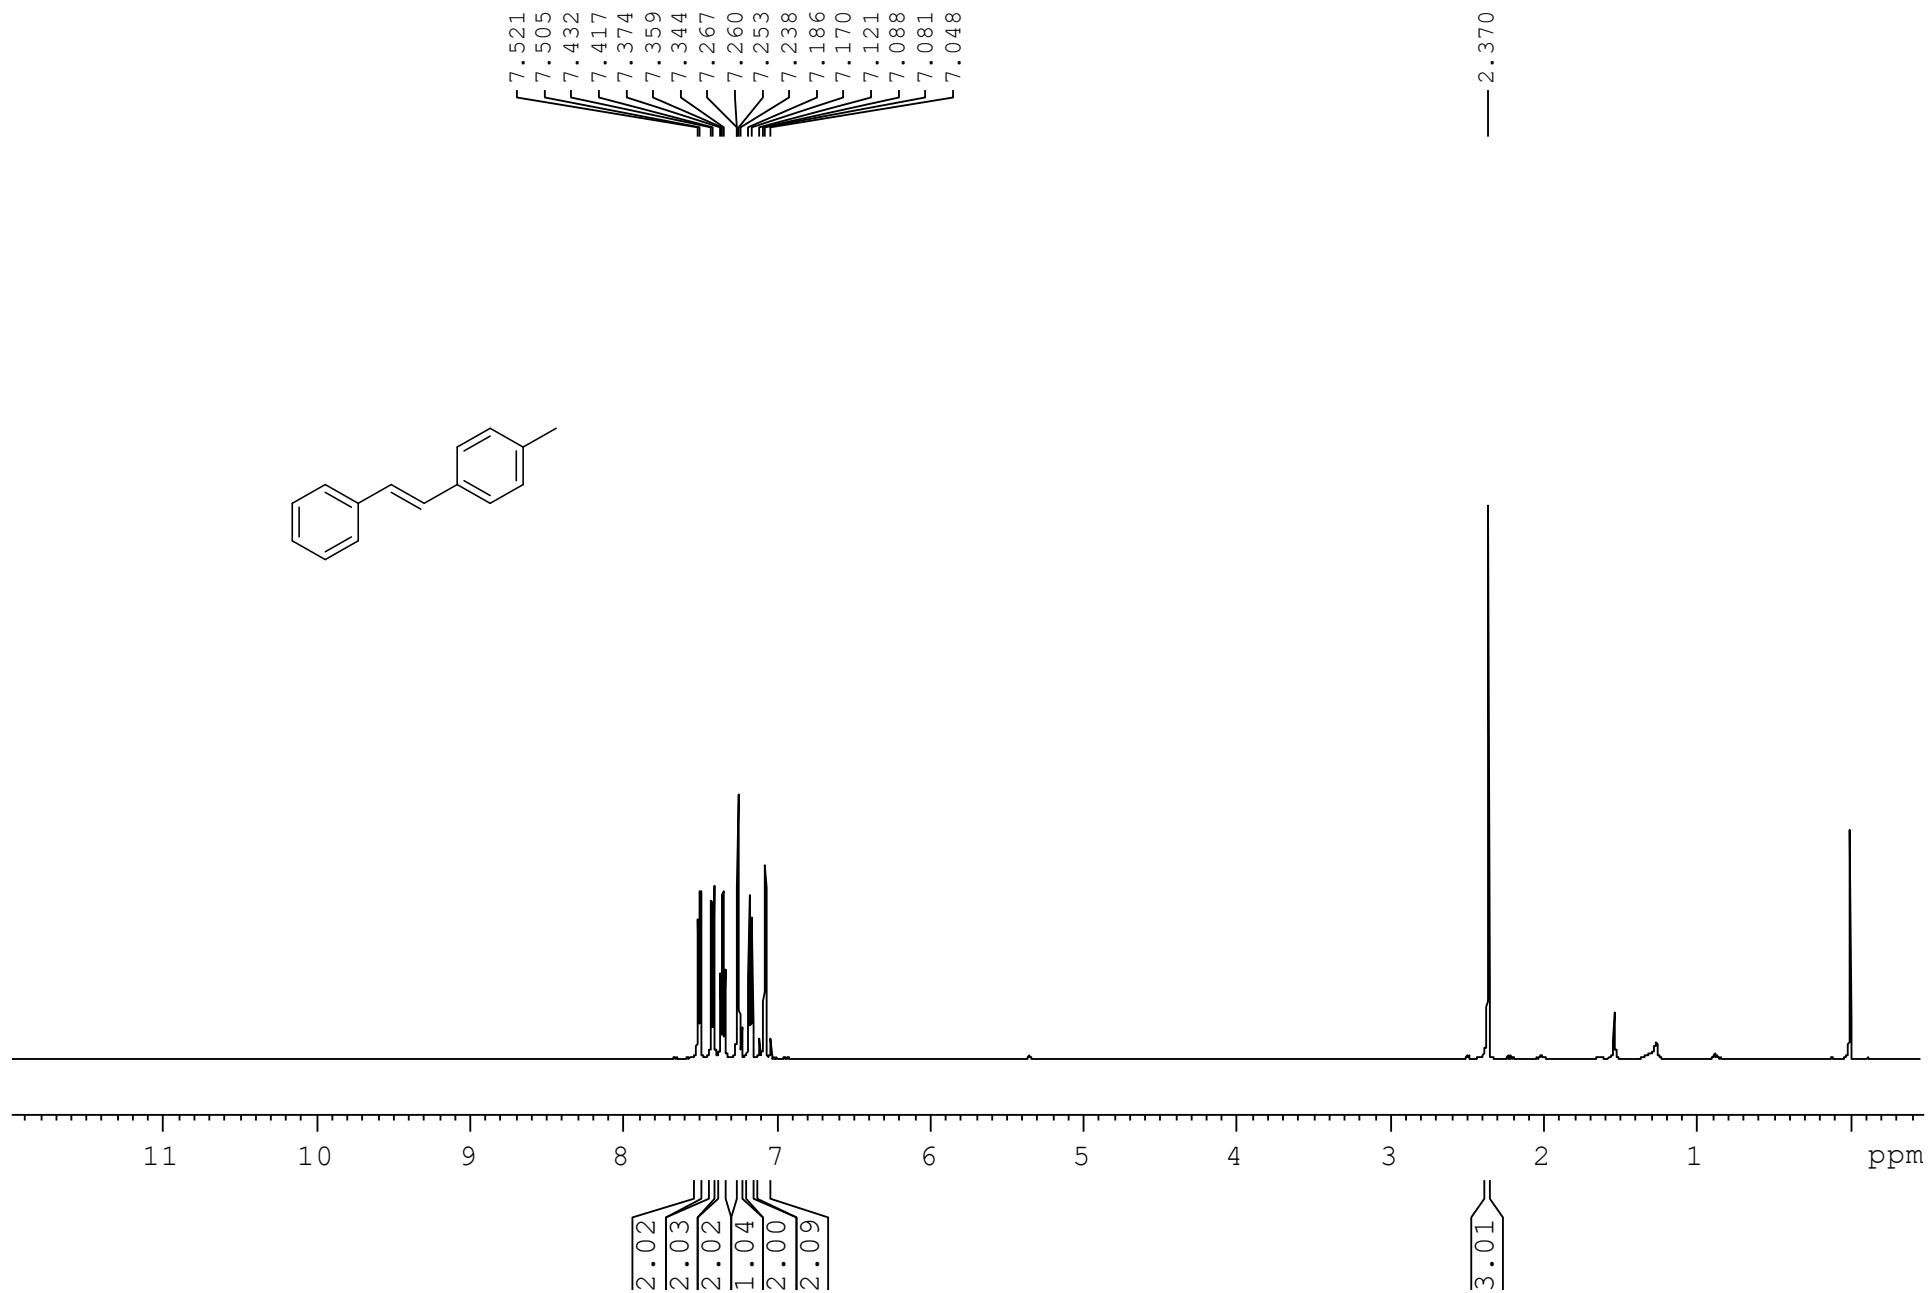

Figure S3. <sup>1</sup>H NMR spectra of S2 (CDCl<sub>3</sub>, 500 M)

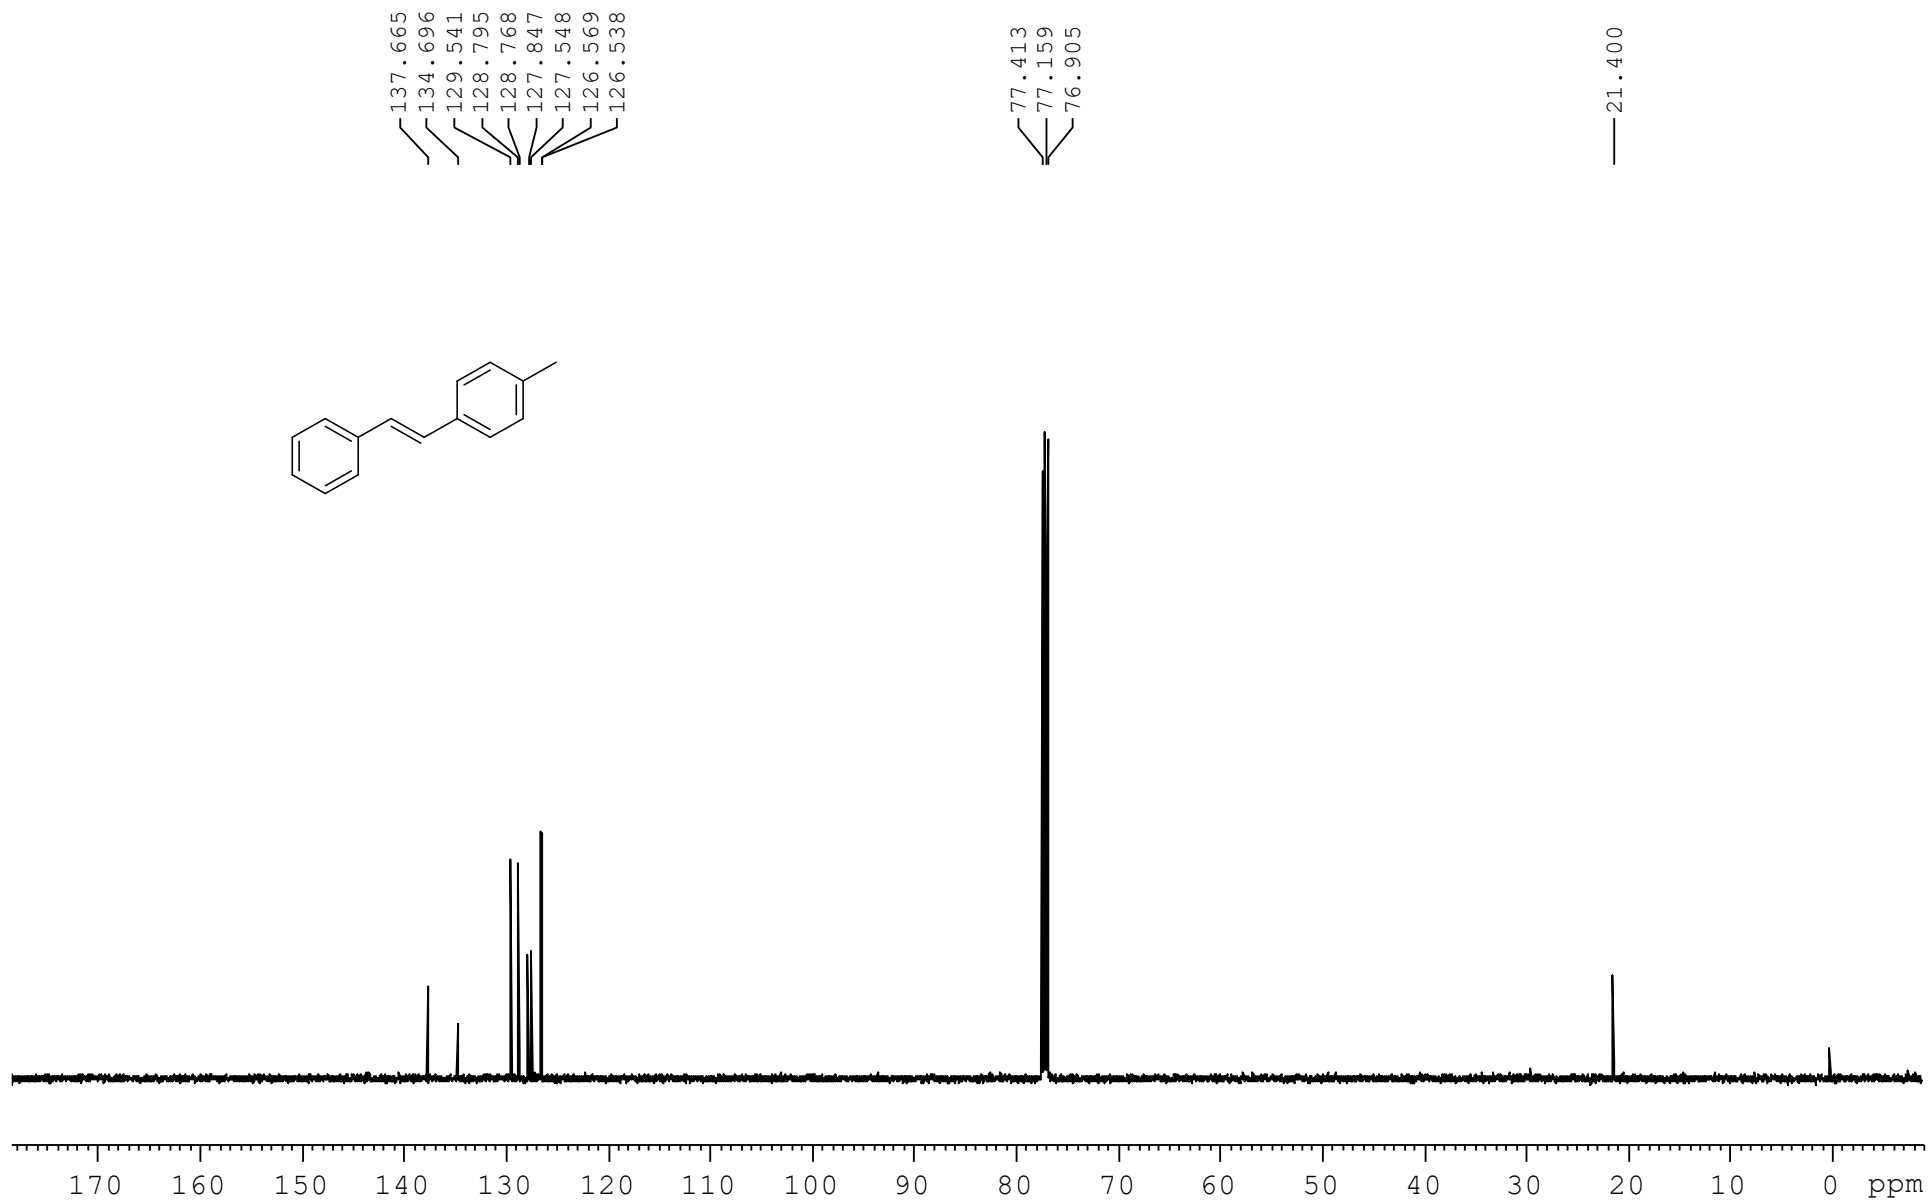

Figure S4. <sup>13</sup>C NMR spectra of S2 (CDCl<sub>3</sub>, 125 M)

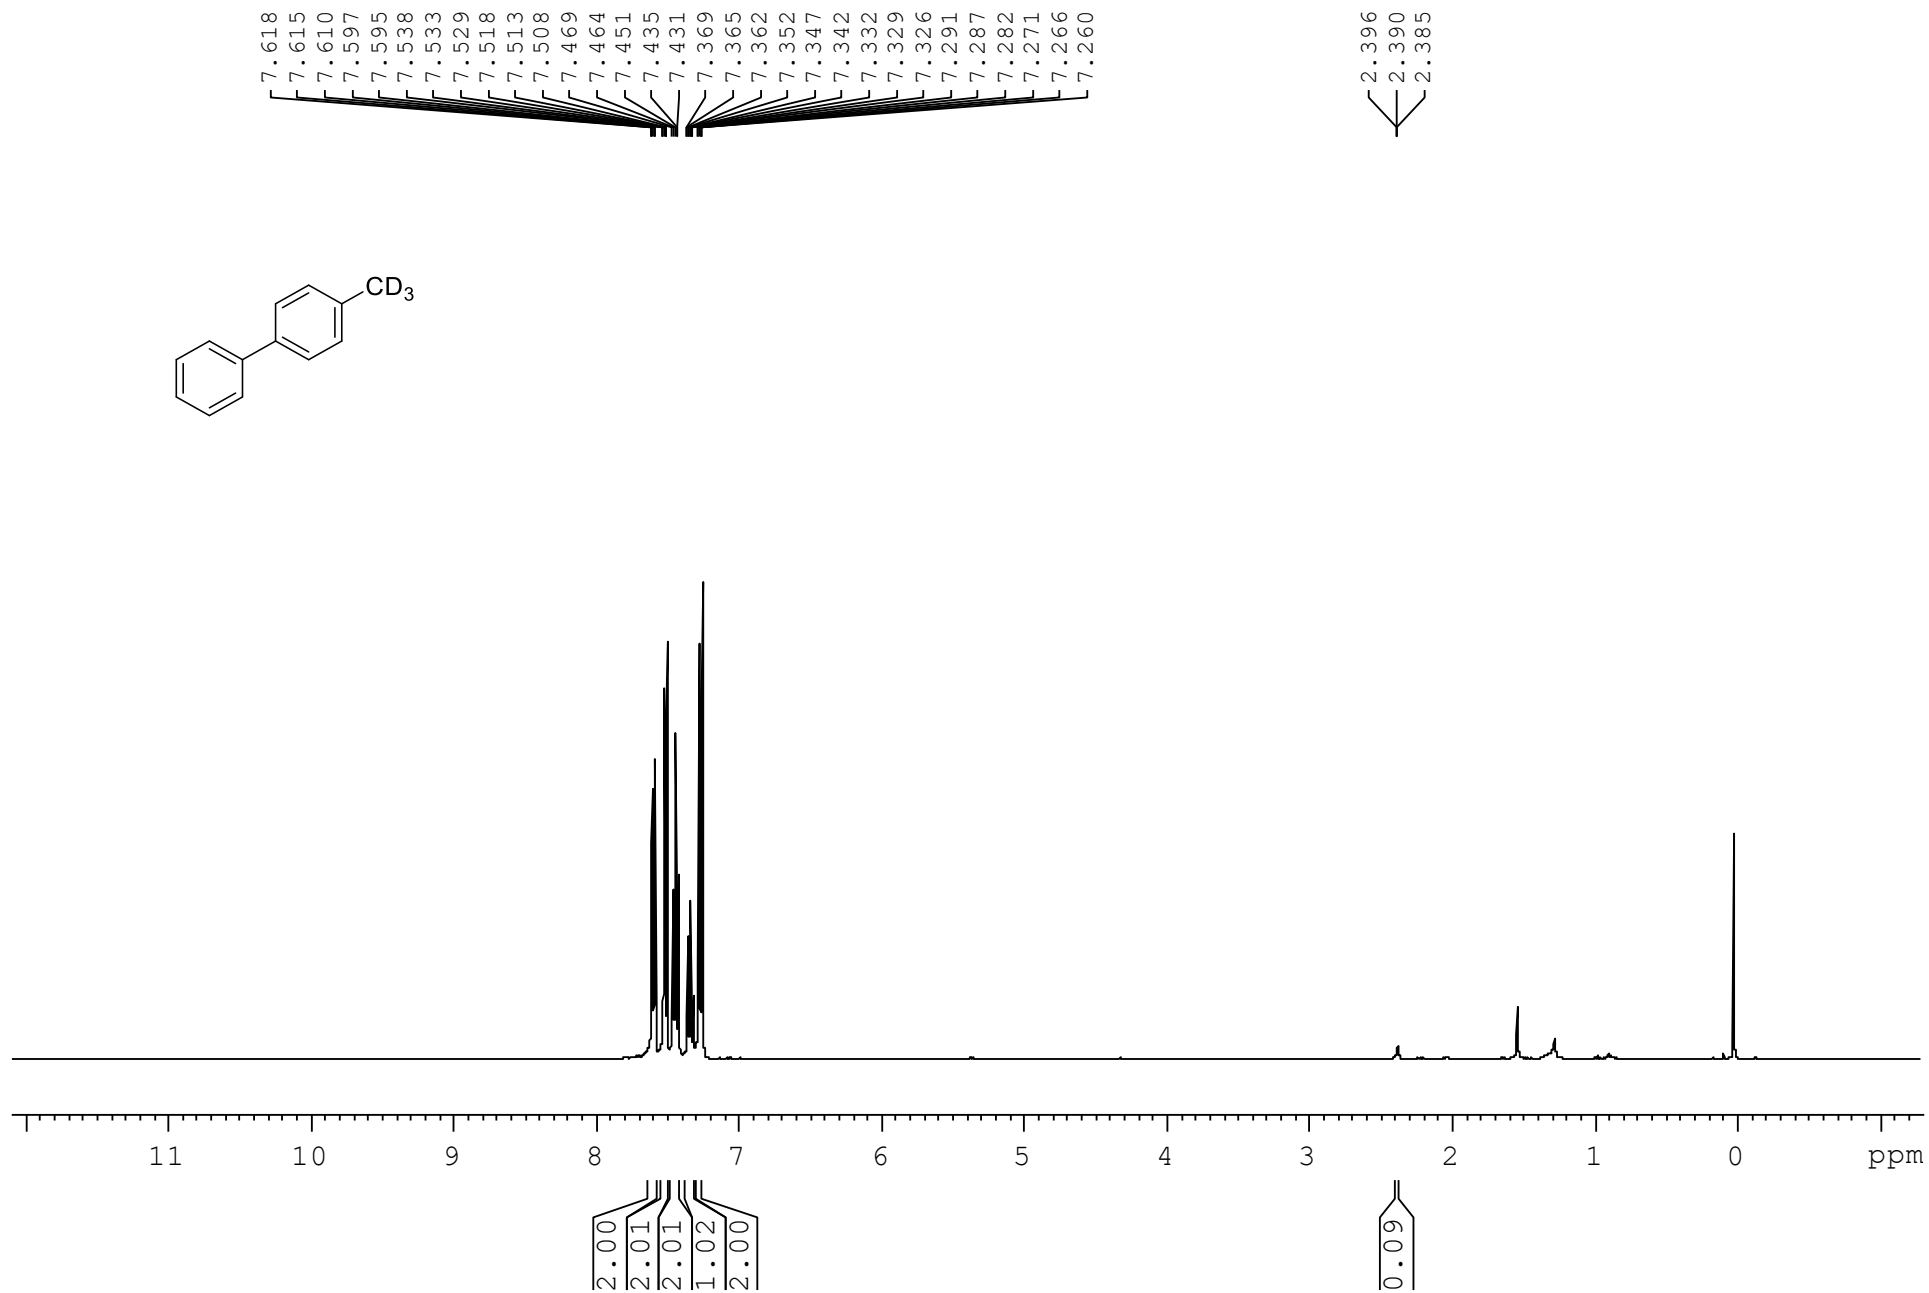

Figure S5. <sup>1</sup>H NMR spectra of 1a-d<sub>3</sub> (CDCl<sub>3</sub>, 400 M)



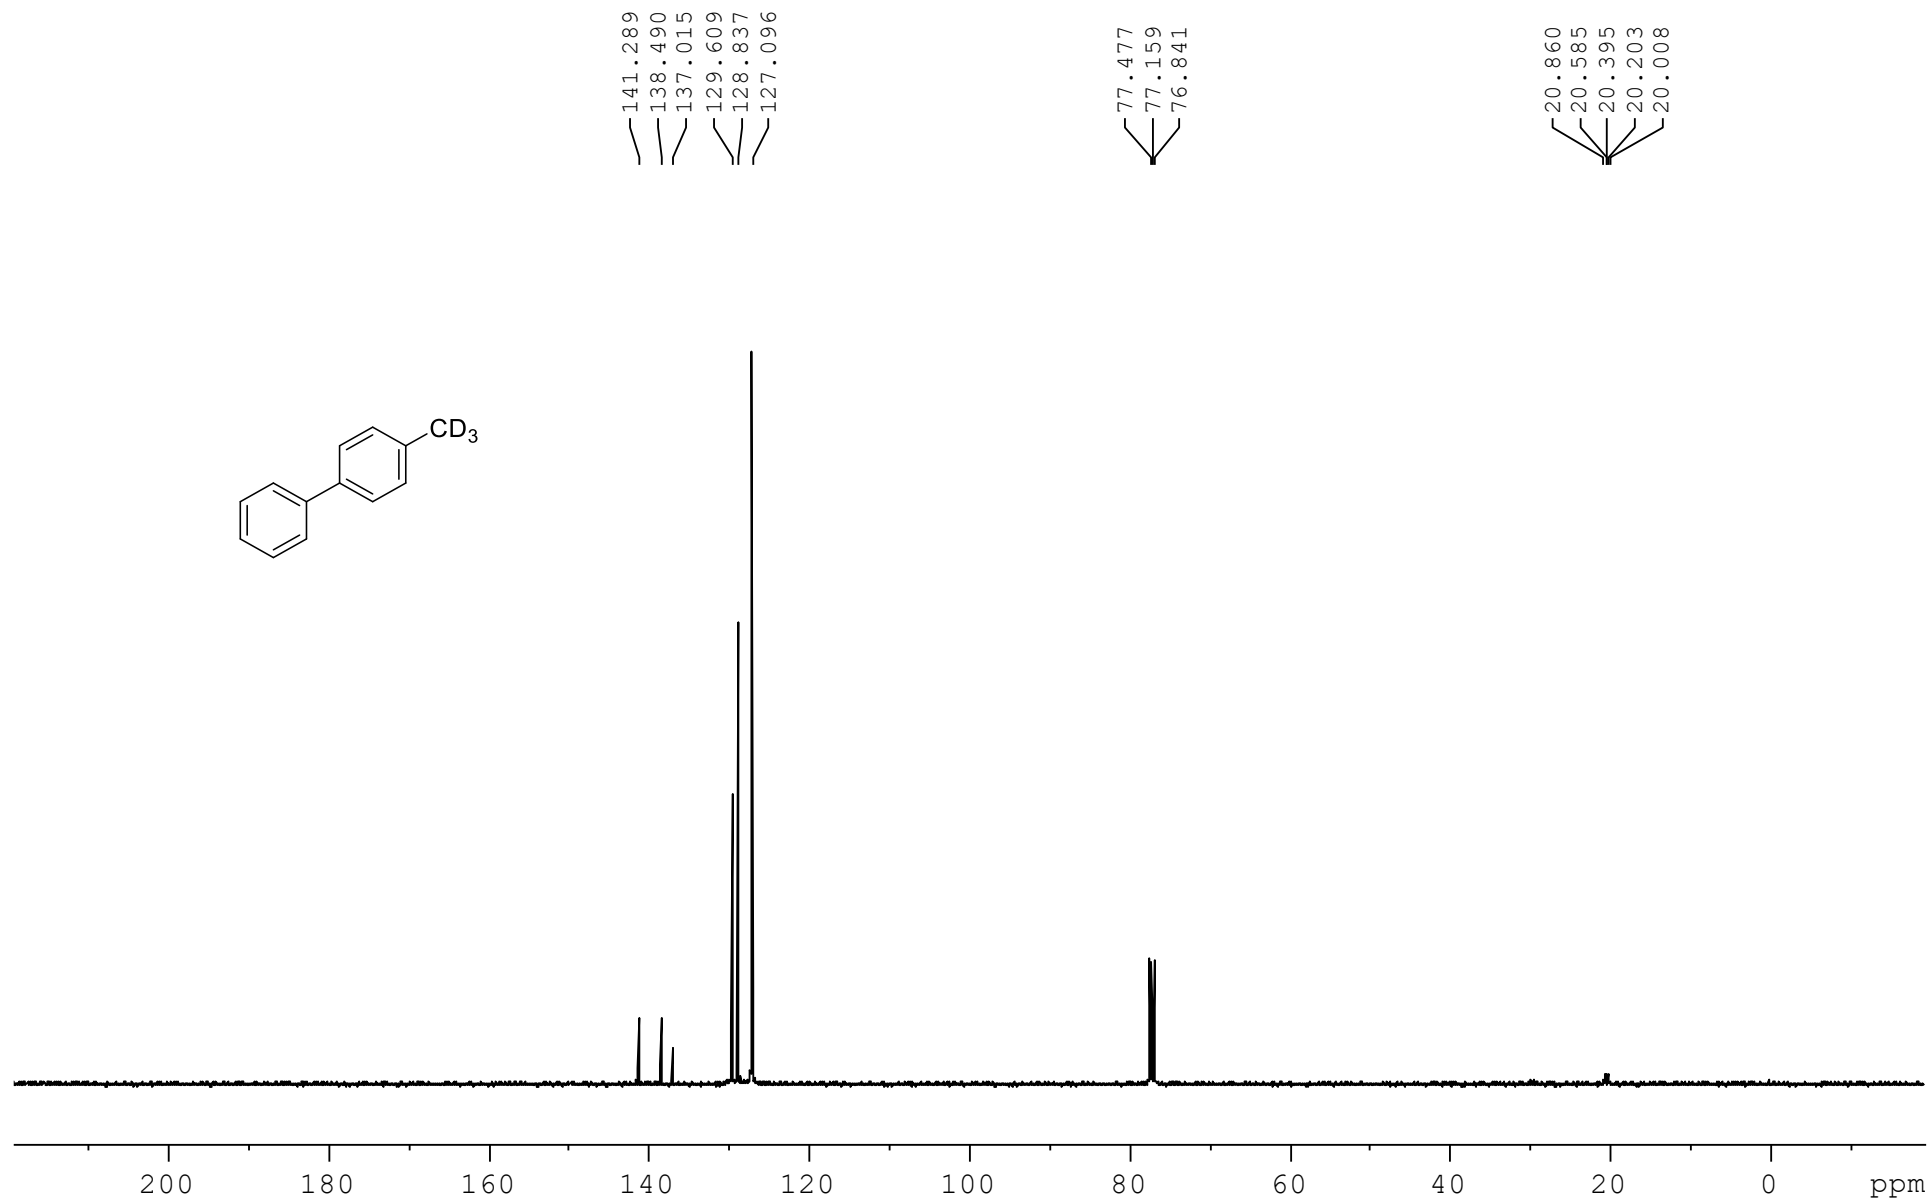

Figure S6. <sup>13</sup>C NMR spectra of 1a-d<sub>3</sub> (CDCl<sub>3</sub>, 100 M)

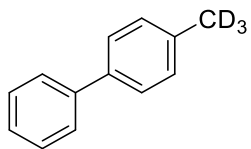

4.00

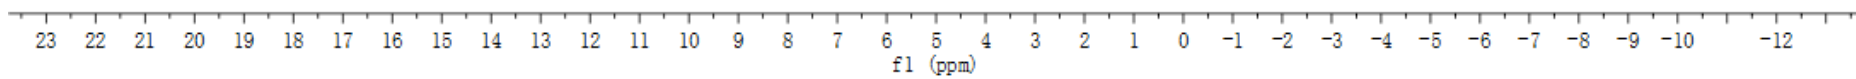

**Figure S7.** <sup>2</sup>H NMR spectra of **1a-d<sub>3</sub>** (MeCN, 92 M)

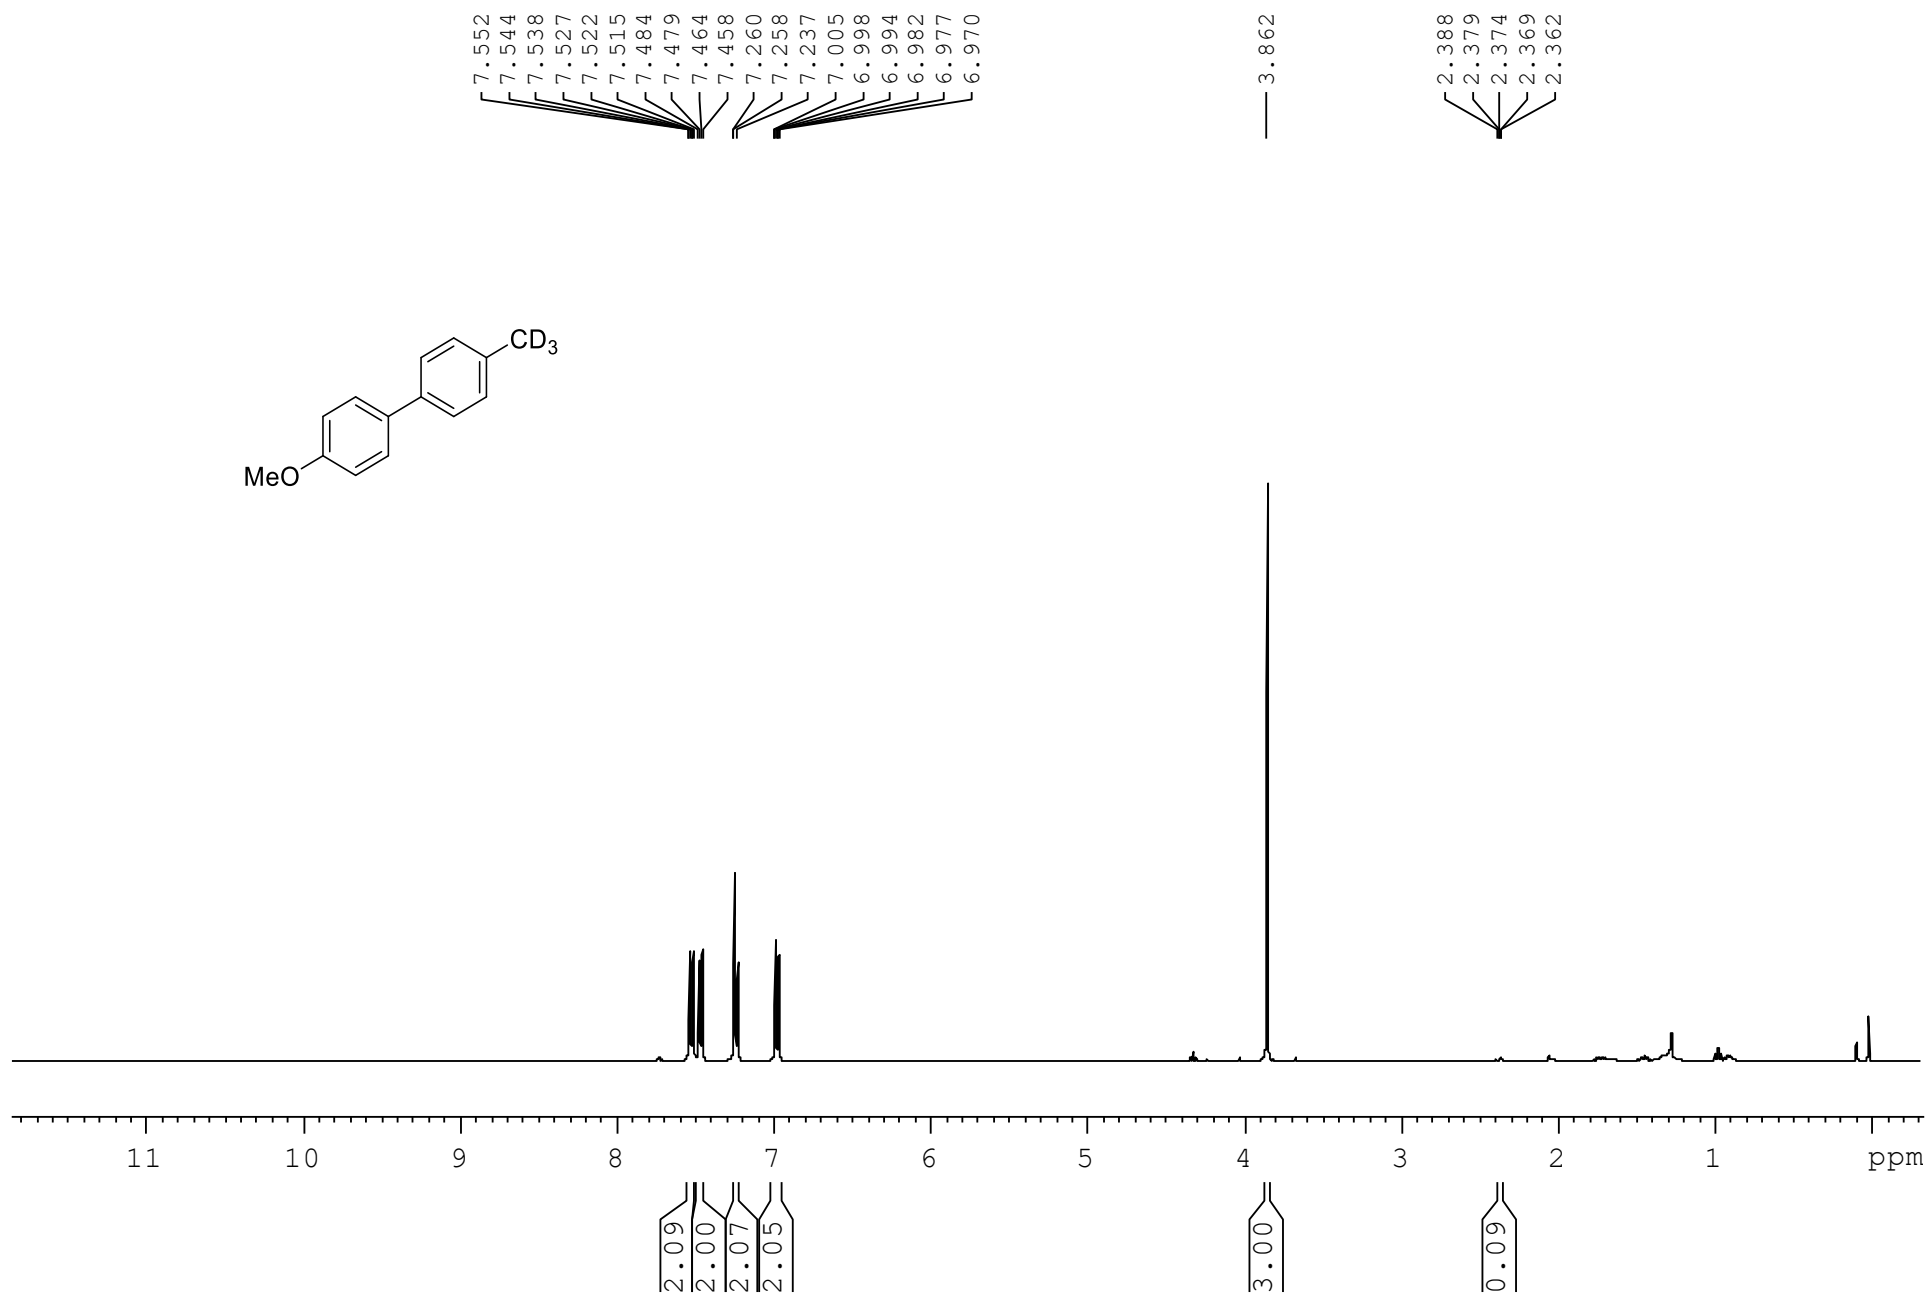

Figure S8. <sup>1</sup>H NMR spectra of **1b-d<sub>3</sub>** (CDCl<sub>3</sub>, 400 M)

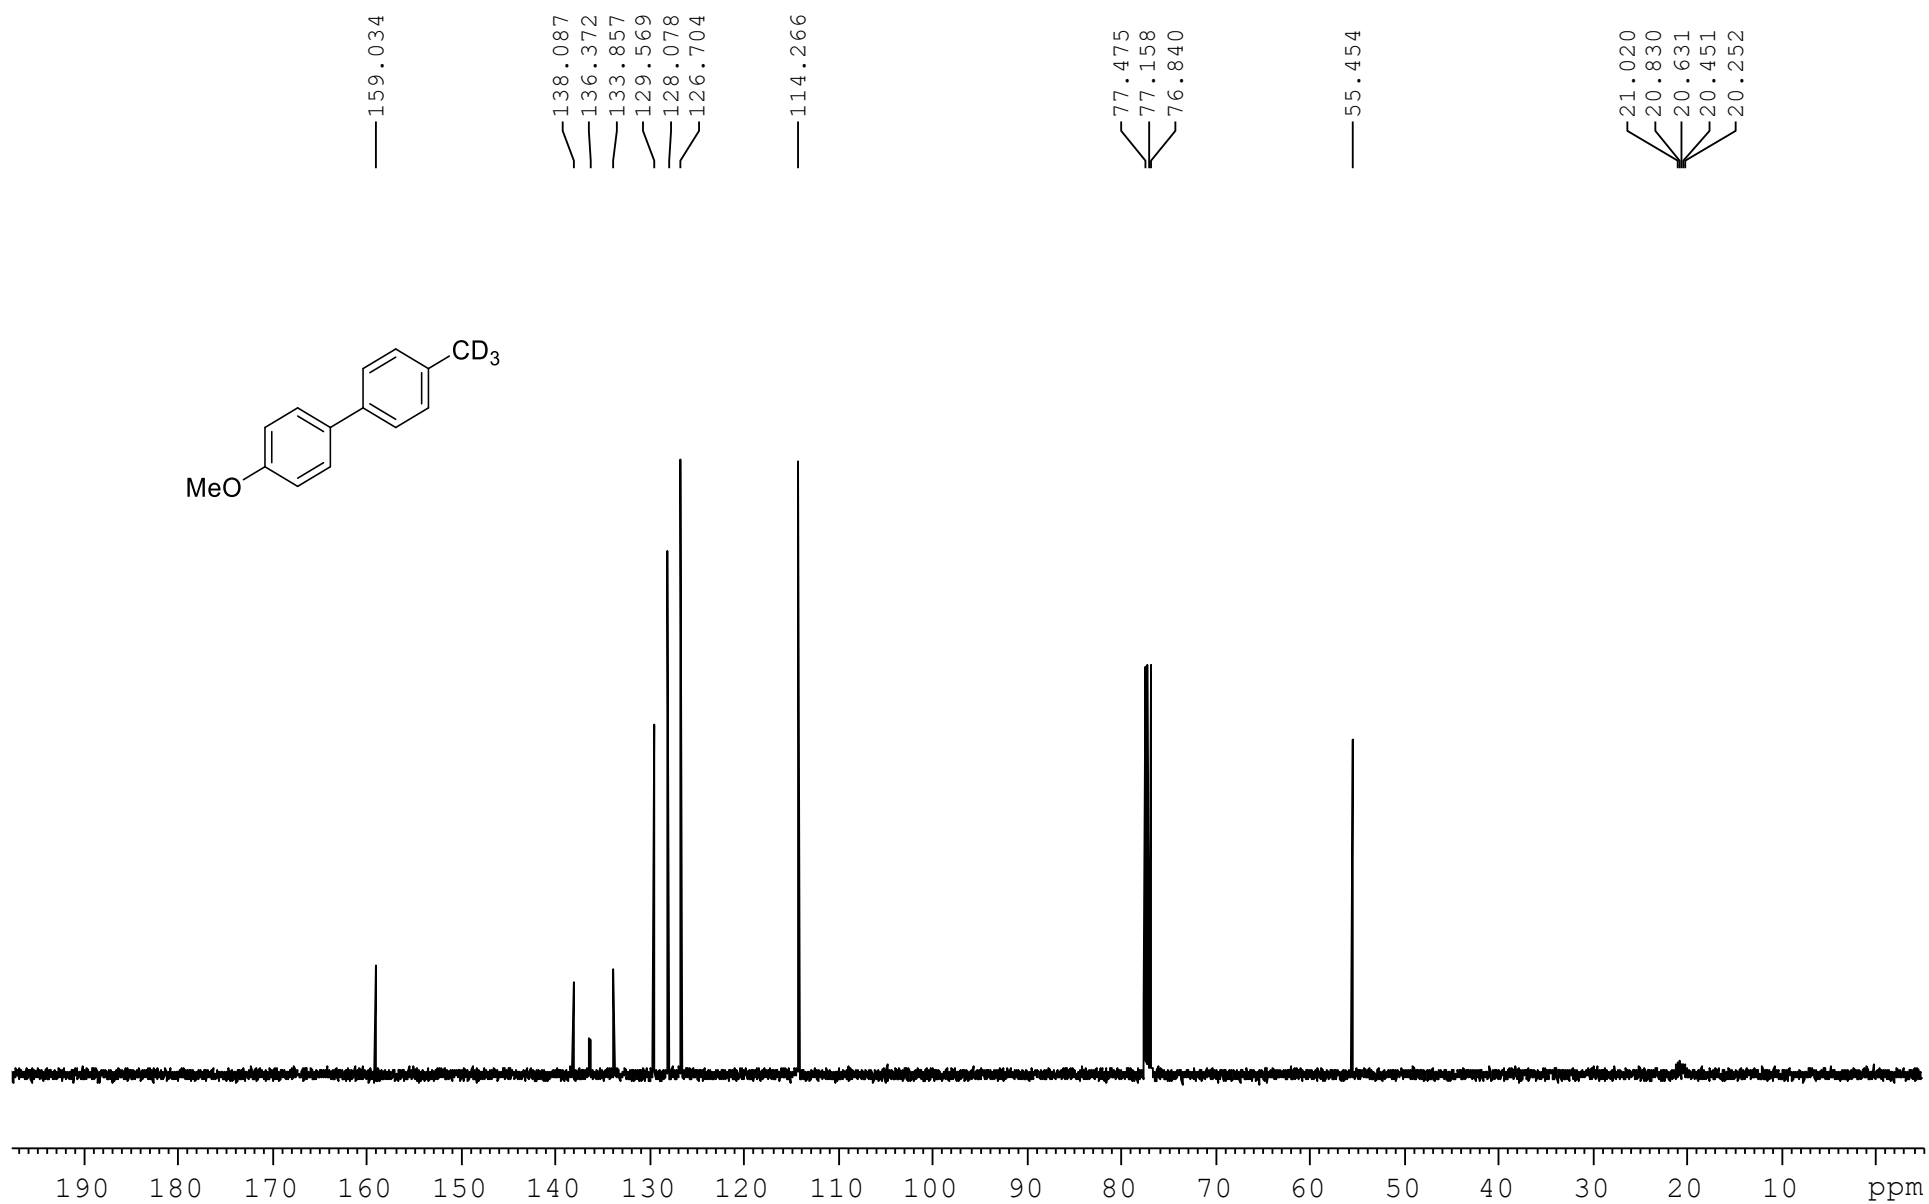

Figure S9. <sup>13</sup>C NMR spectra of **1b-d<sub>3</sub>** (CDCl<sub>3</sub>, 100 M)

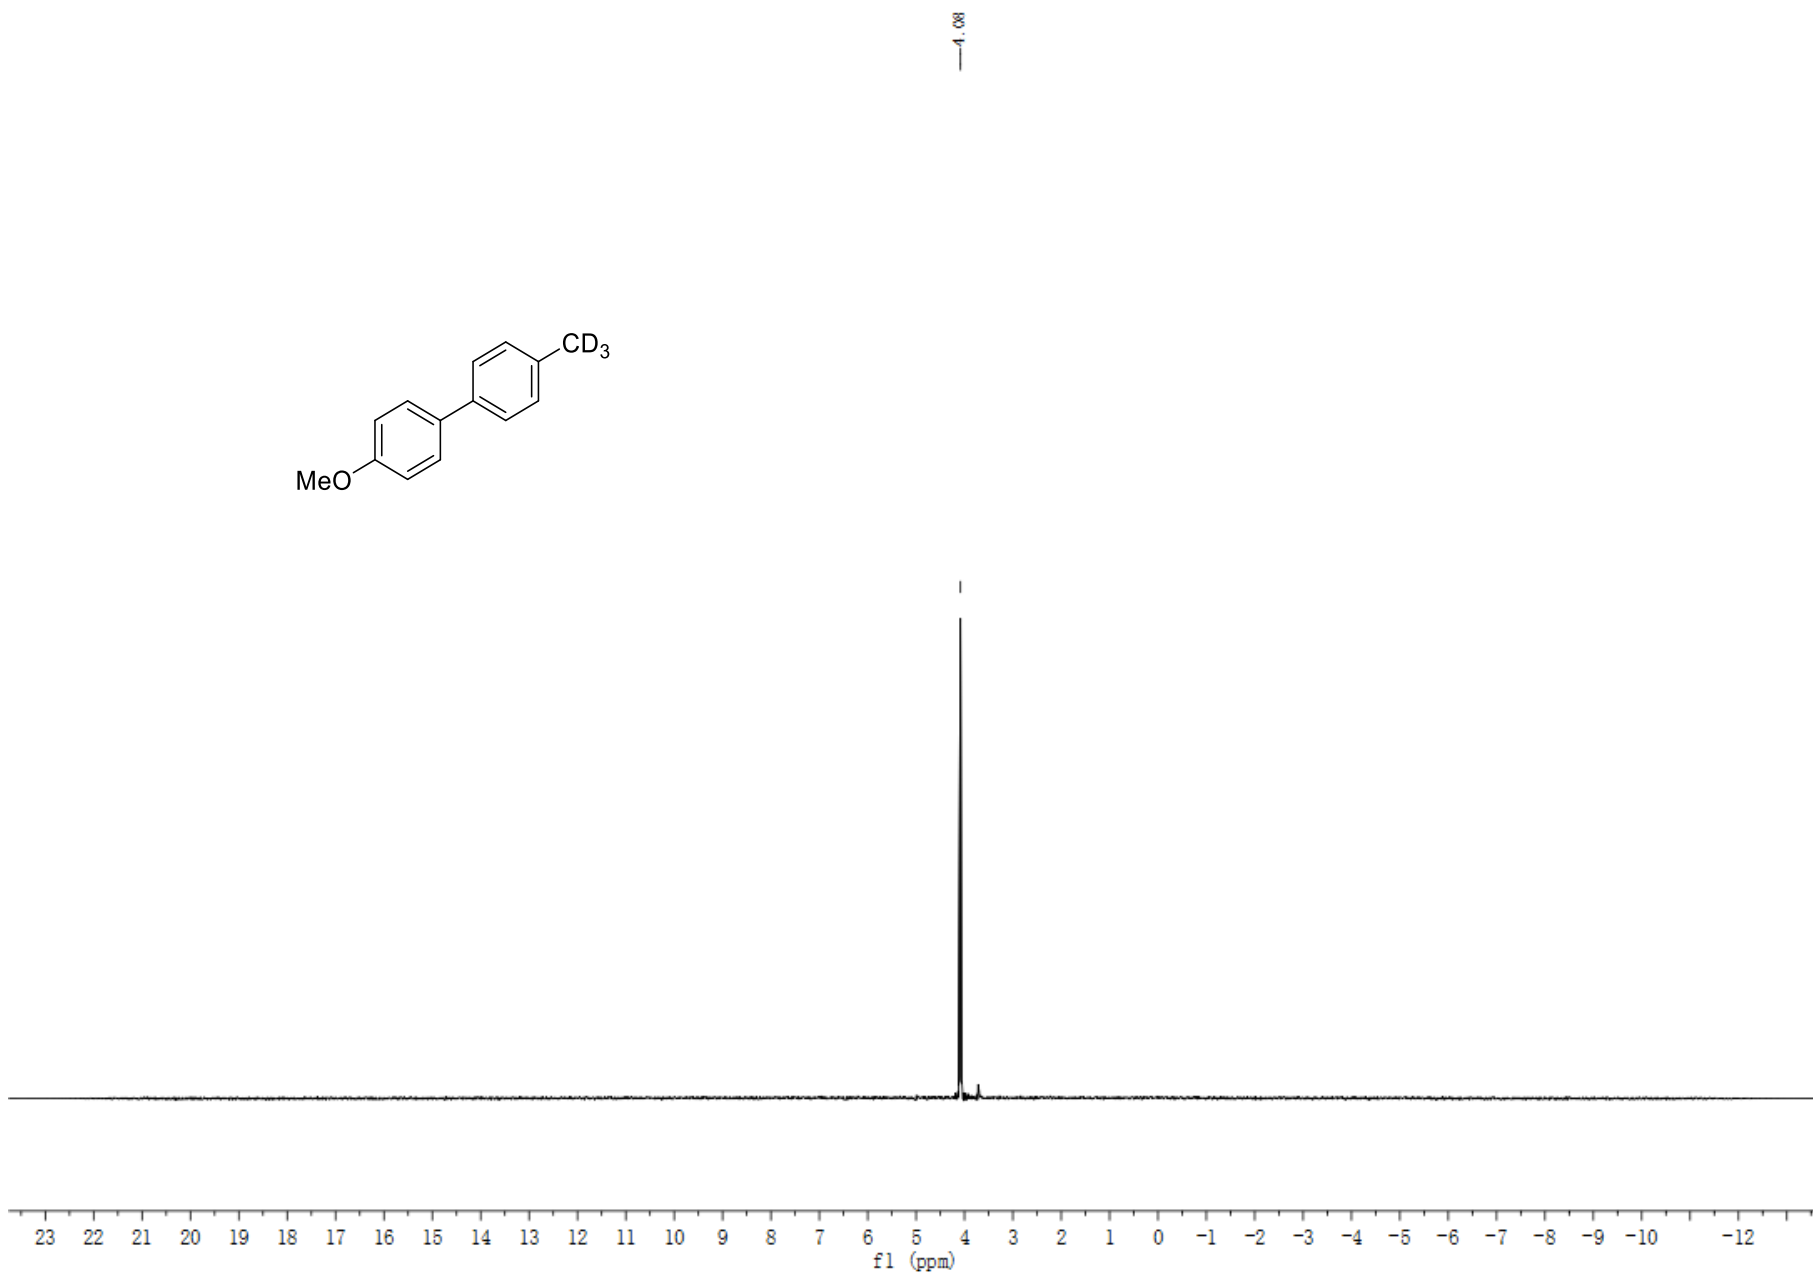

**Figure S10.**  $^2\text{H}$  NMR spectra of **1b-d<sub>3</sub>** ( $\text{MeCN}$ , 92 M)

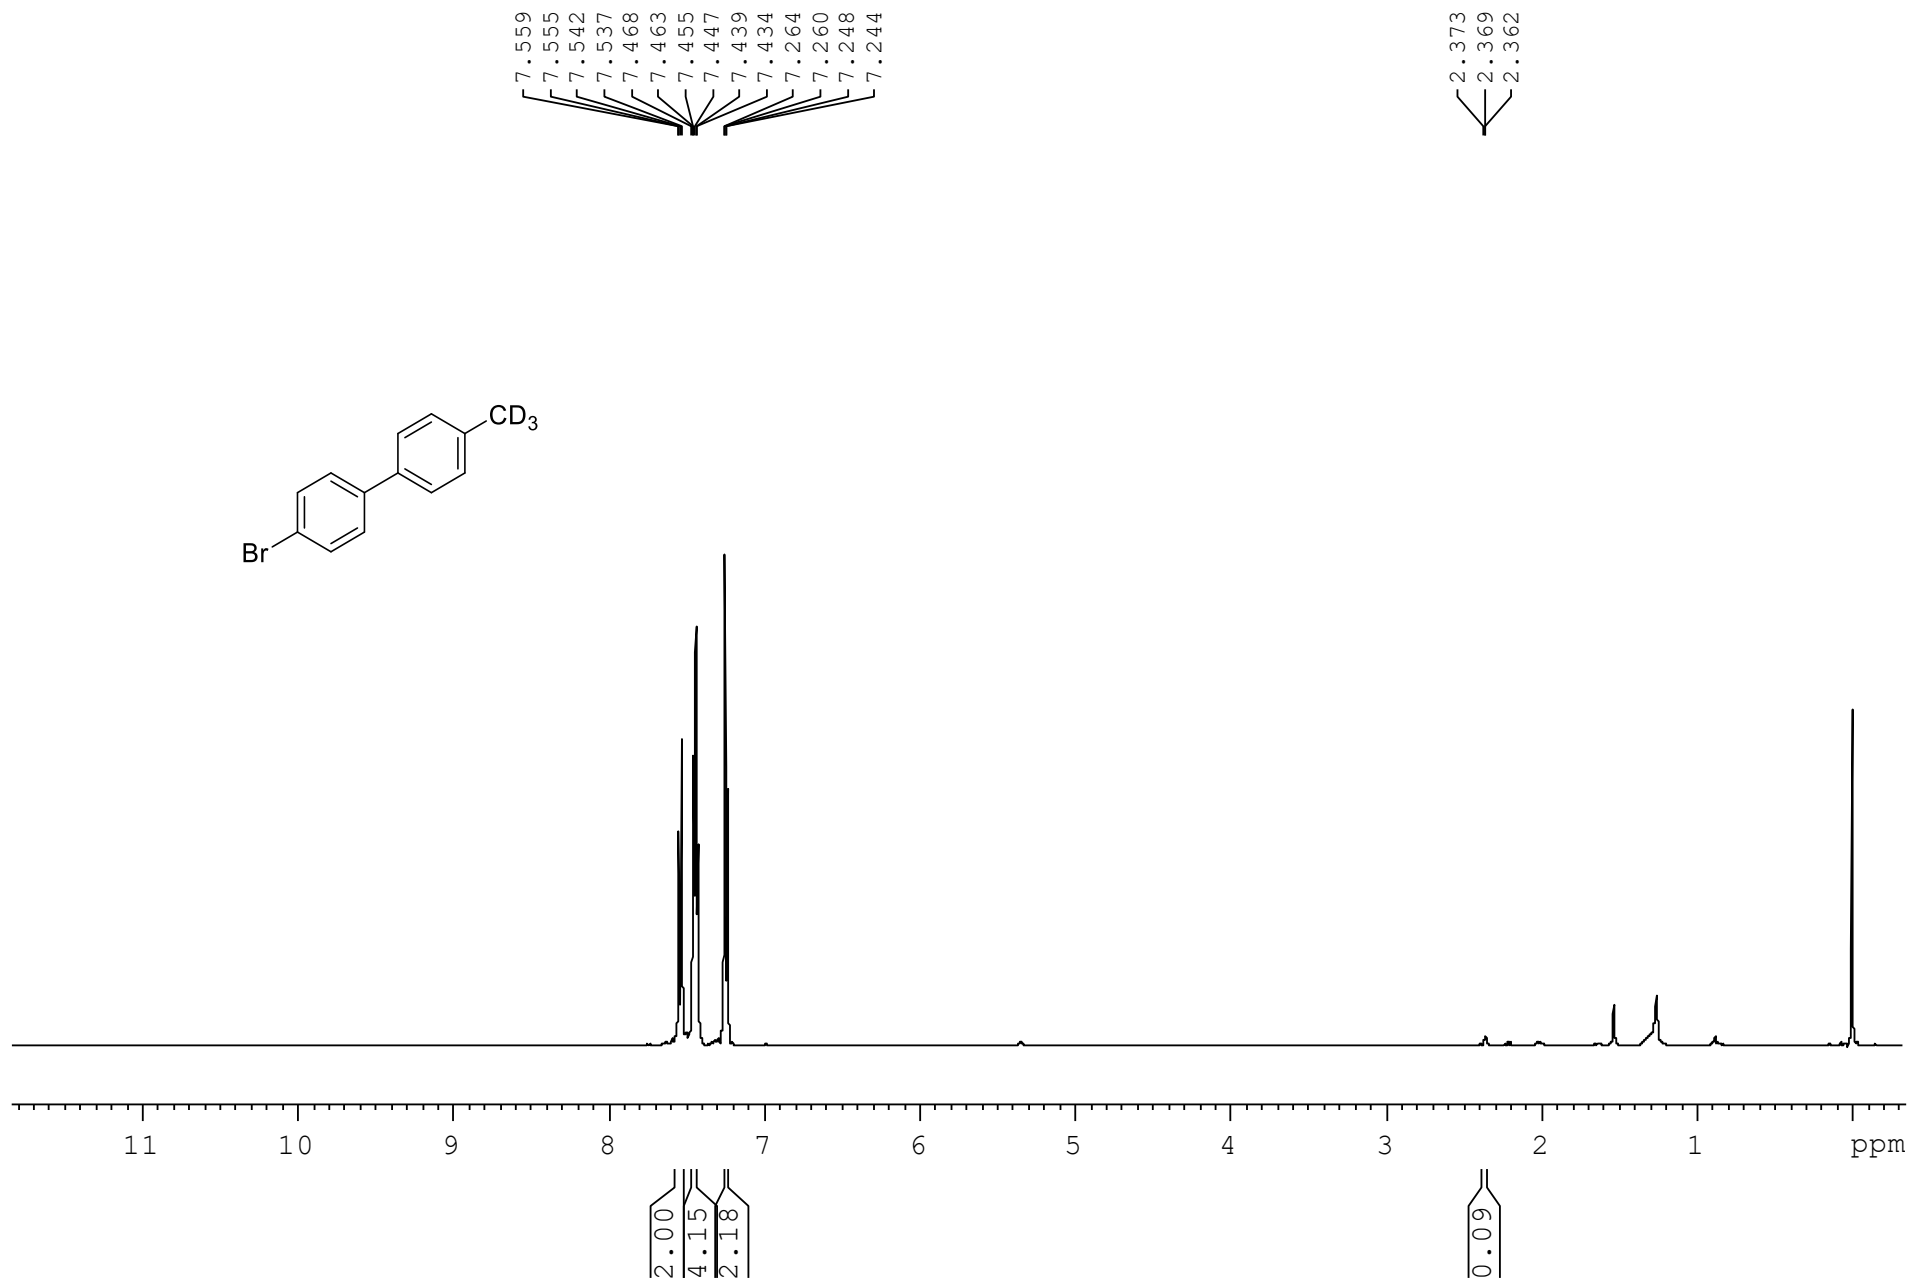

Figure S11.  $^1\text{H}$  NMR spectra of **1c-d<sub>3</sub>** ( $\text{CDCl}_3$ , 400 M)

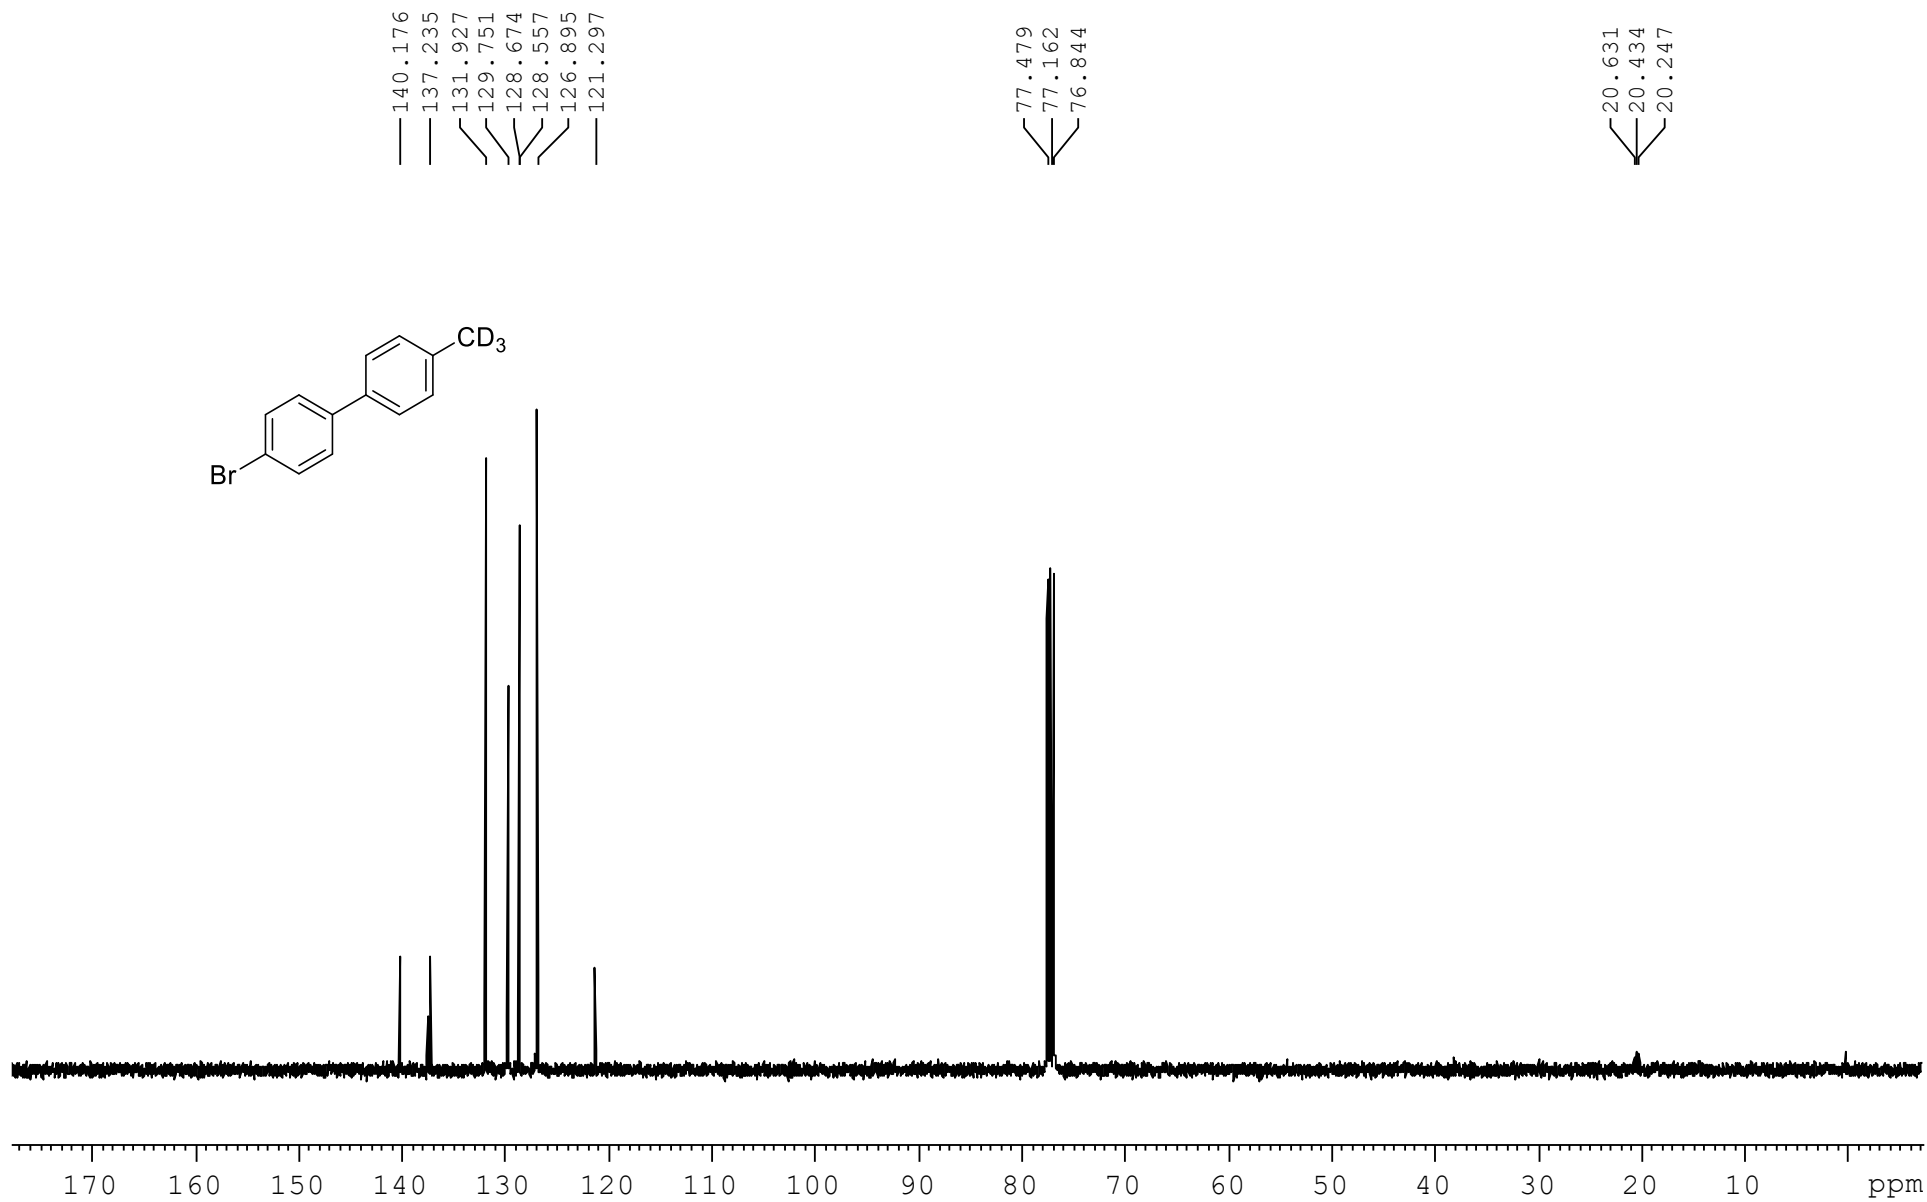

Figure S12. <sup>13</sup>C NMR spectra of **1c-d<sub>3</sub>** (CDCl<sub>3</sub>, 100 M)

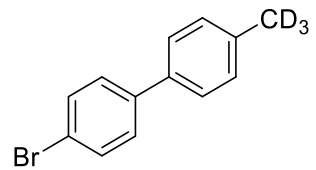

4.00

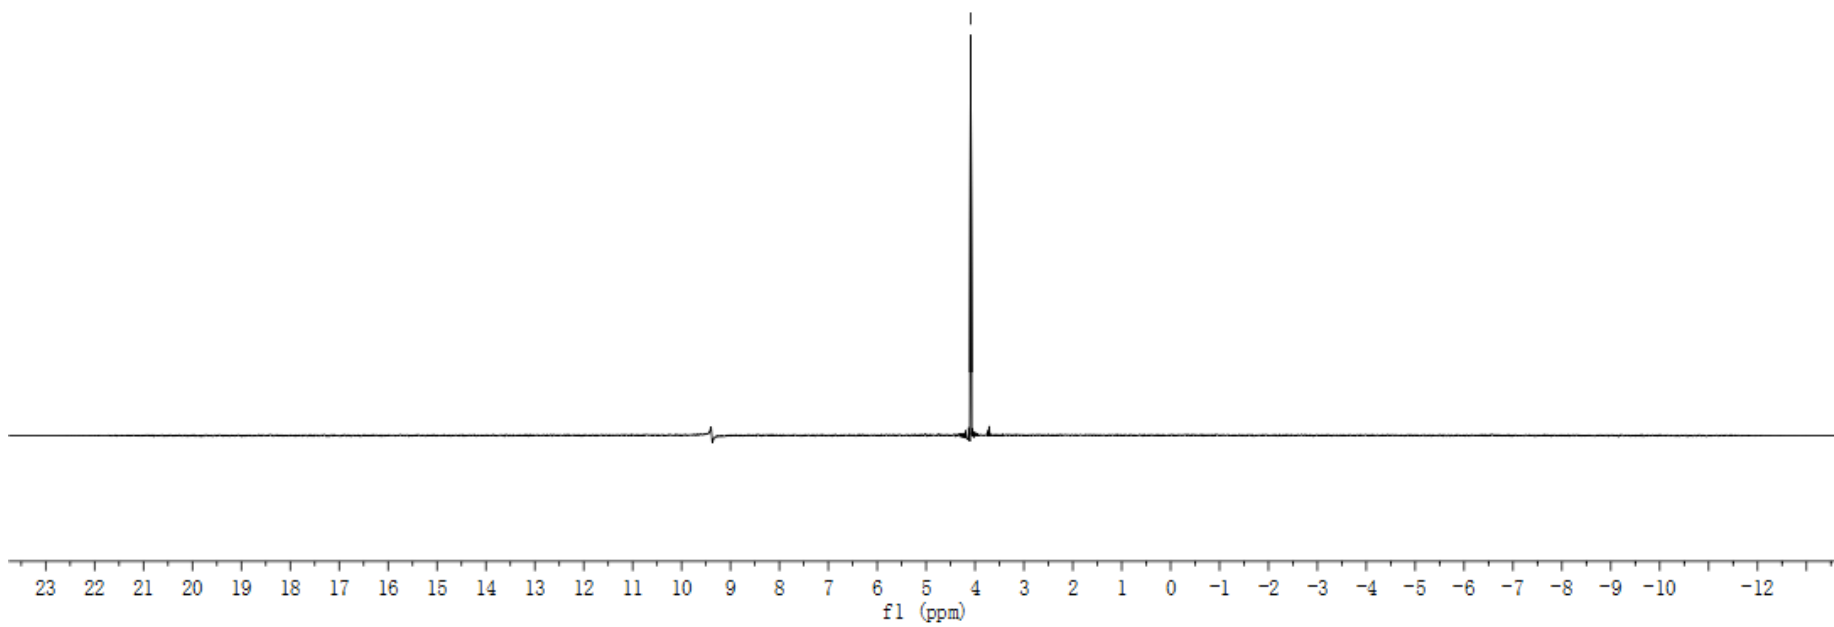

Figure S13. <sup>2</sup>H NMR spectra of **1c-d<sub>3</sub>** (MeCN, 92 M)



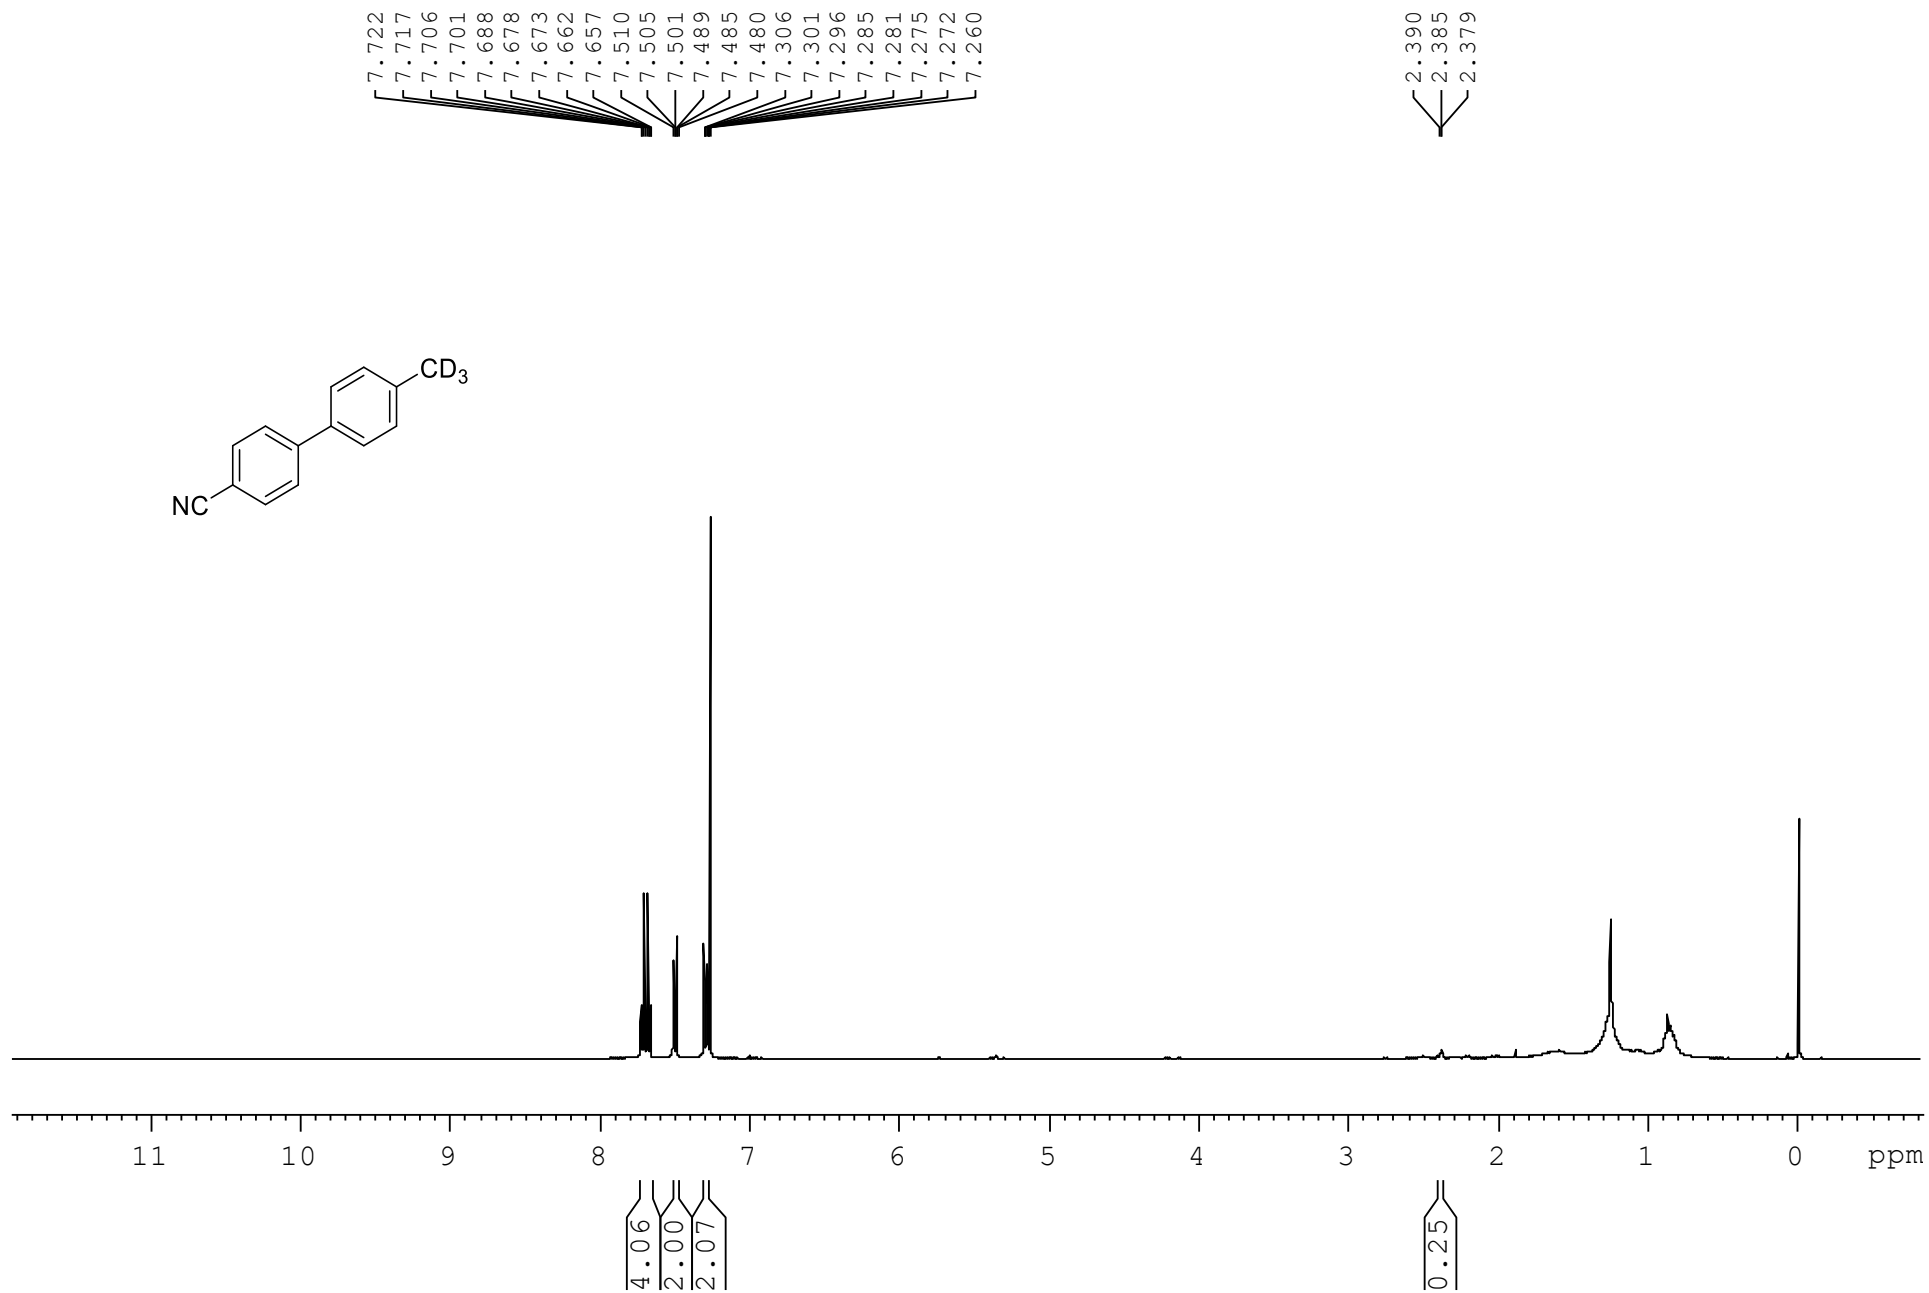

Figure S14. <sup>1</sup>H NMR spectra of 1d-d<sub>3</sub> (CDCl<sub>3</sub>, 400 M)

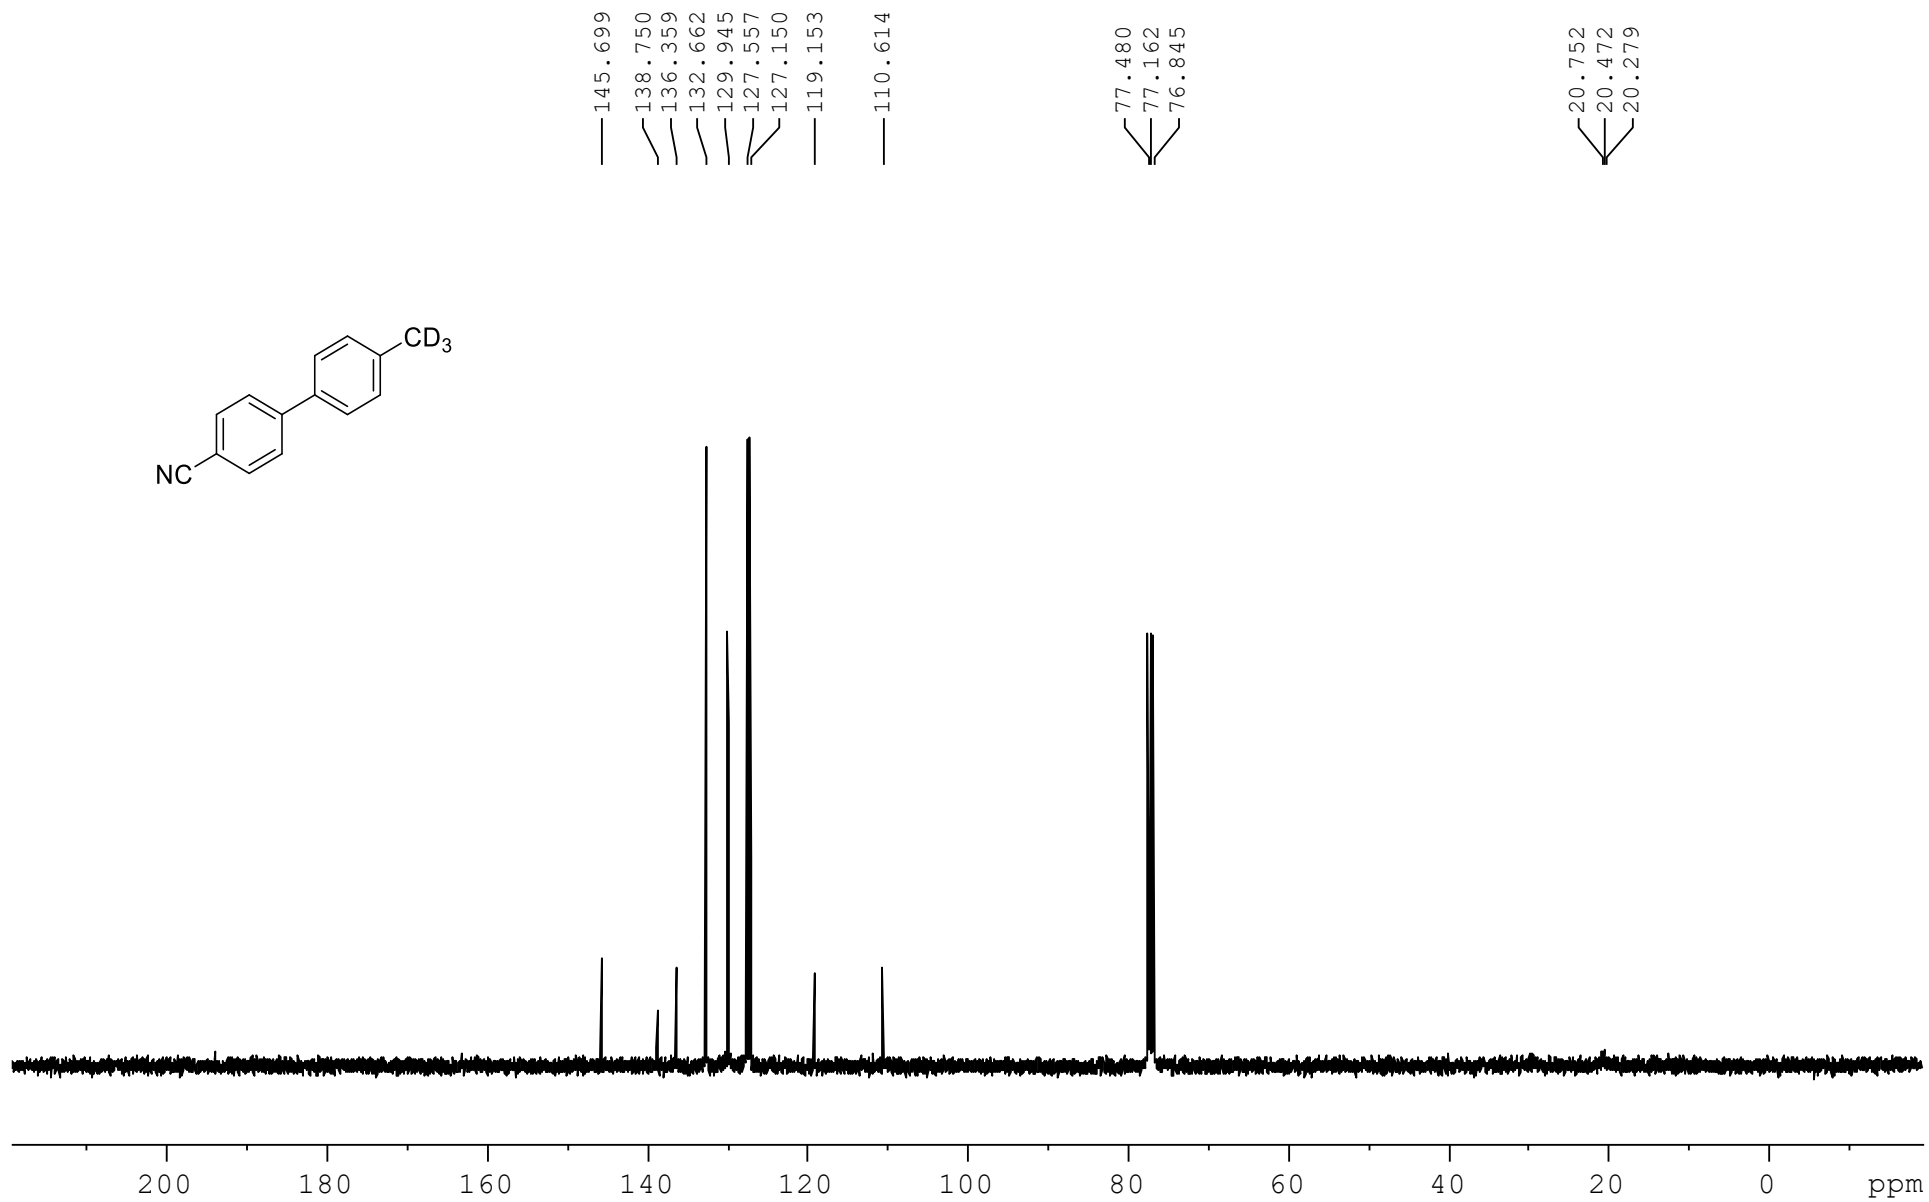

Figure S15. <sup>13</sup>C NMR spectra of **1d-d<sub>3</sub>** (CDCl<sub>3</sub>, 100 M)

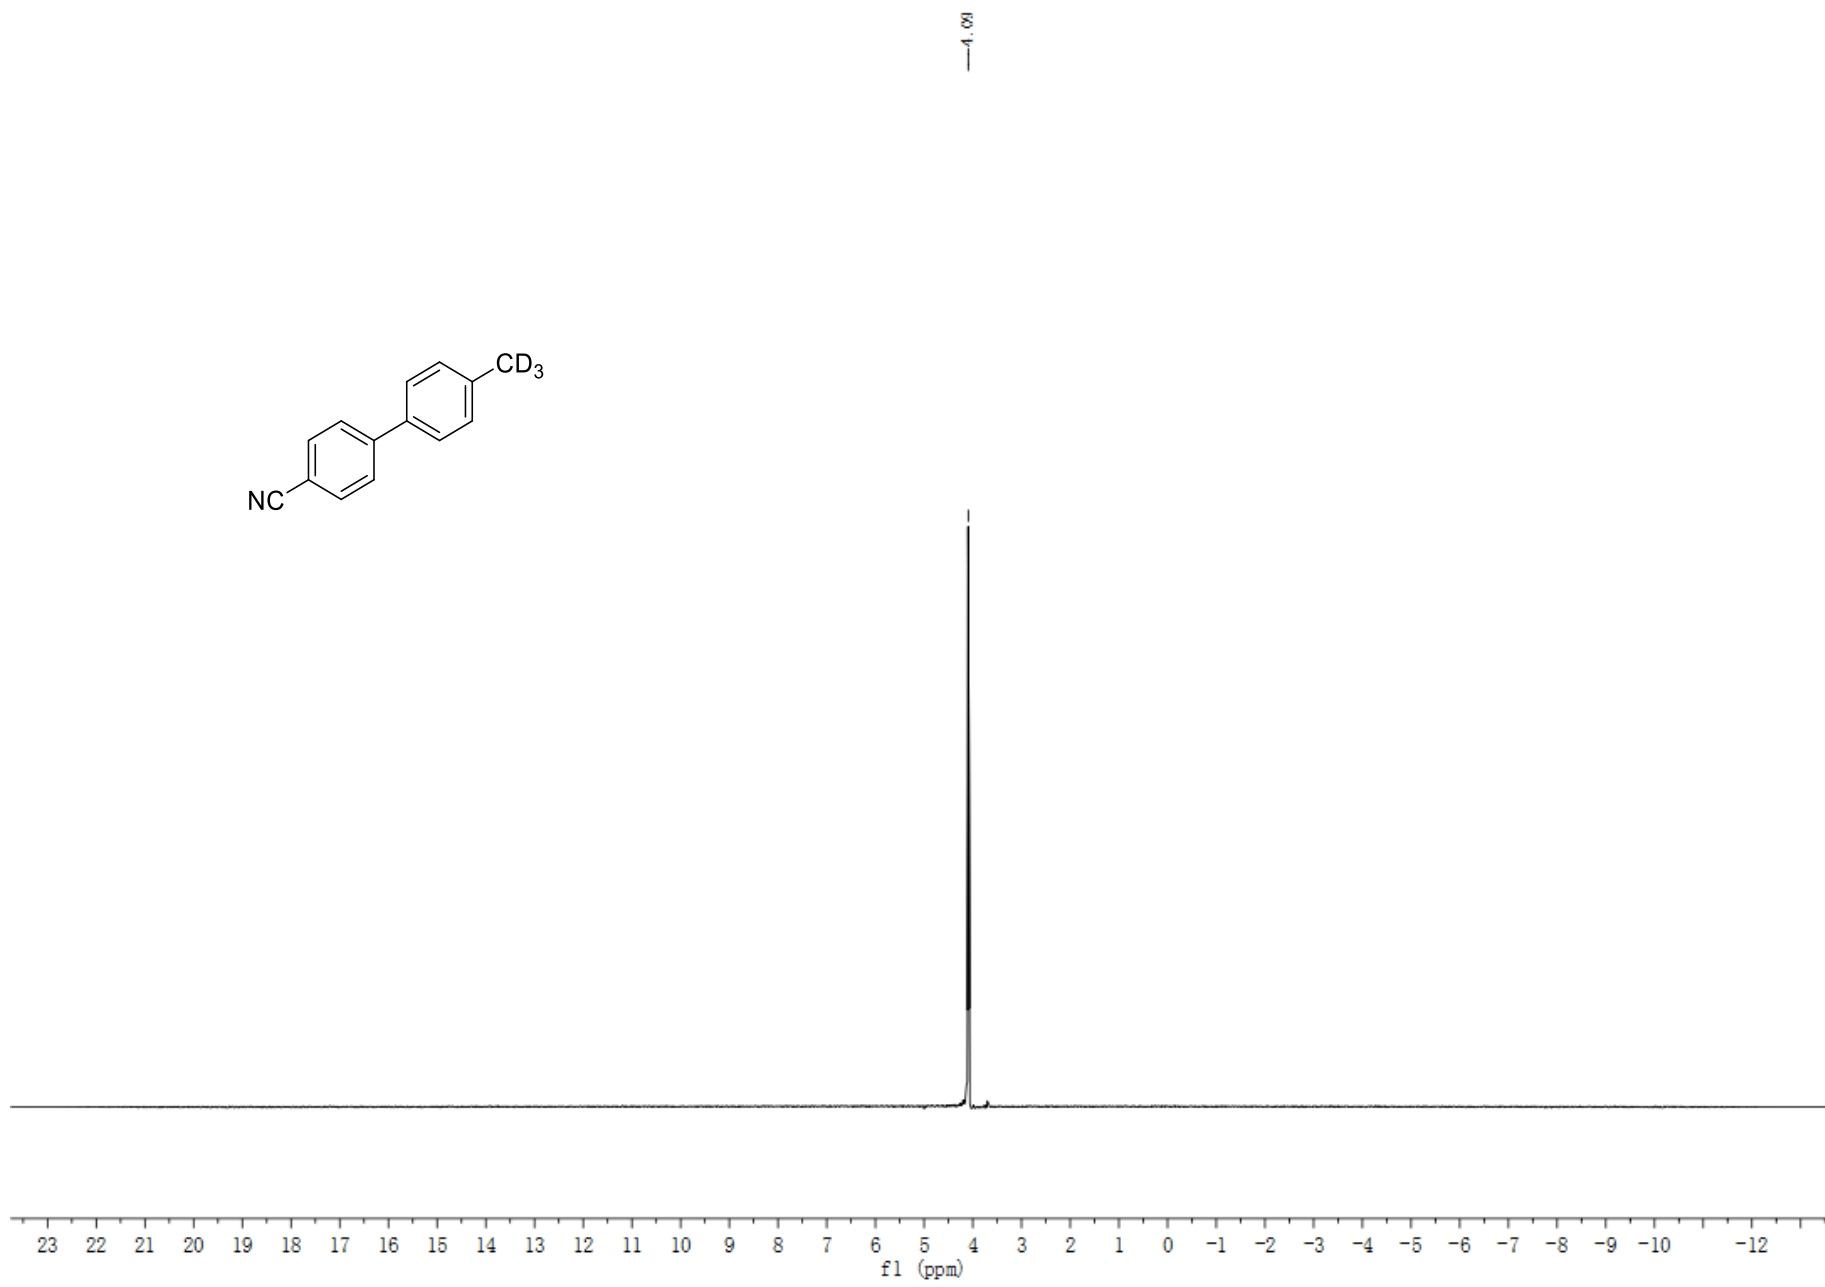

**Figure S16.** <sup>1</sup>H NMR spectra of **1d-d<sub>3</sub>** (MeCN, 92 M)

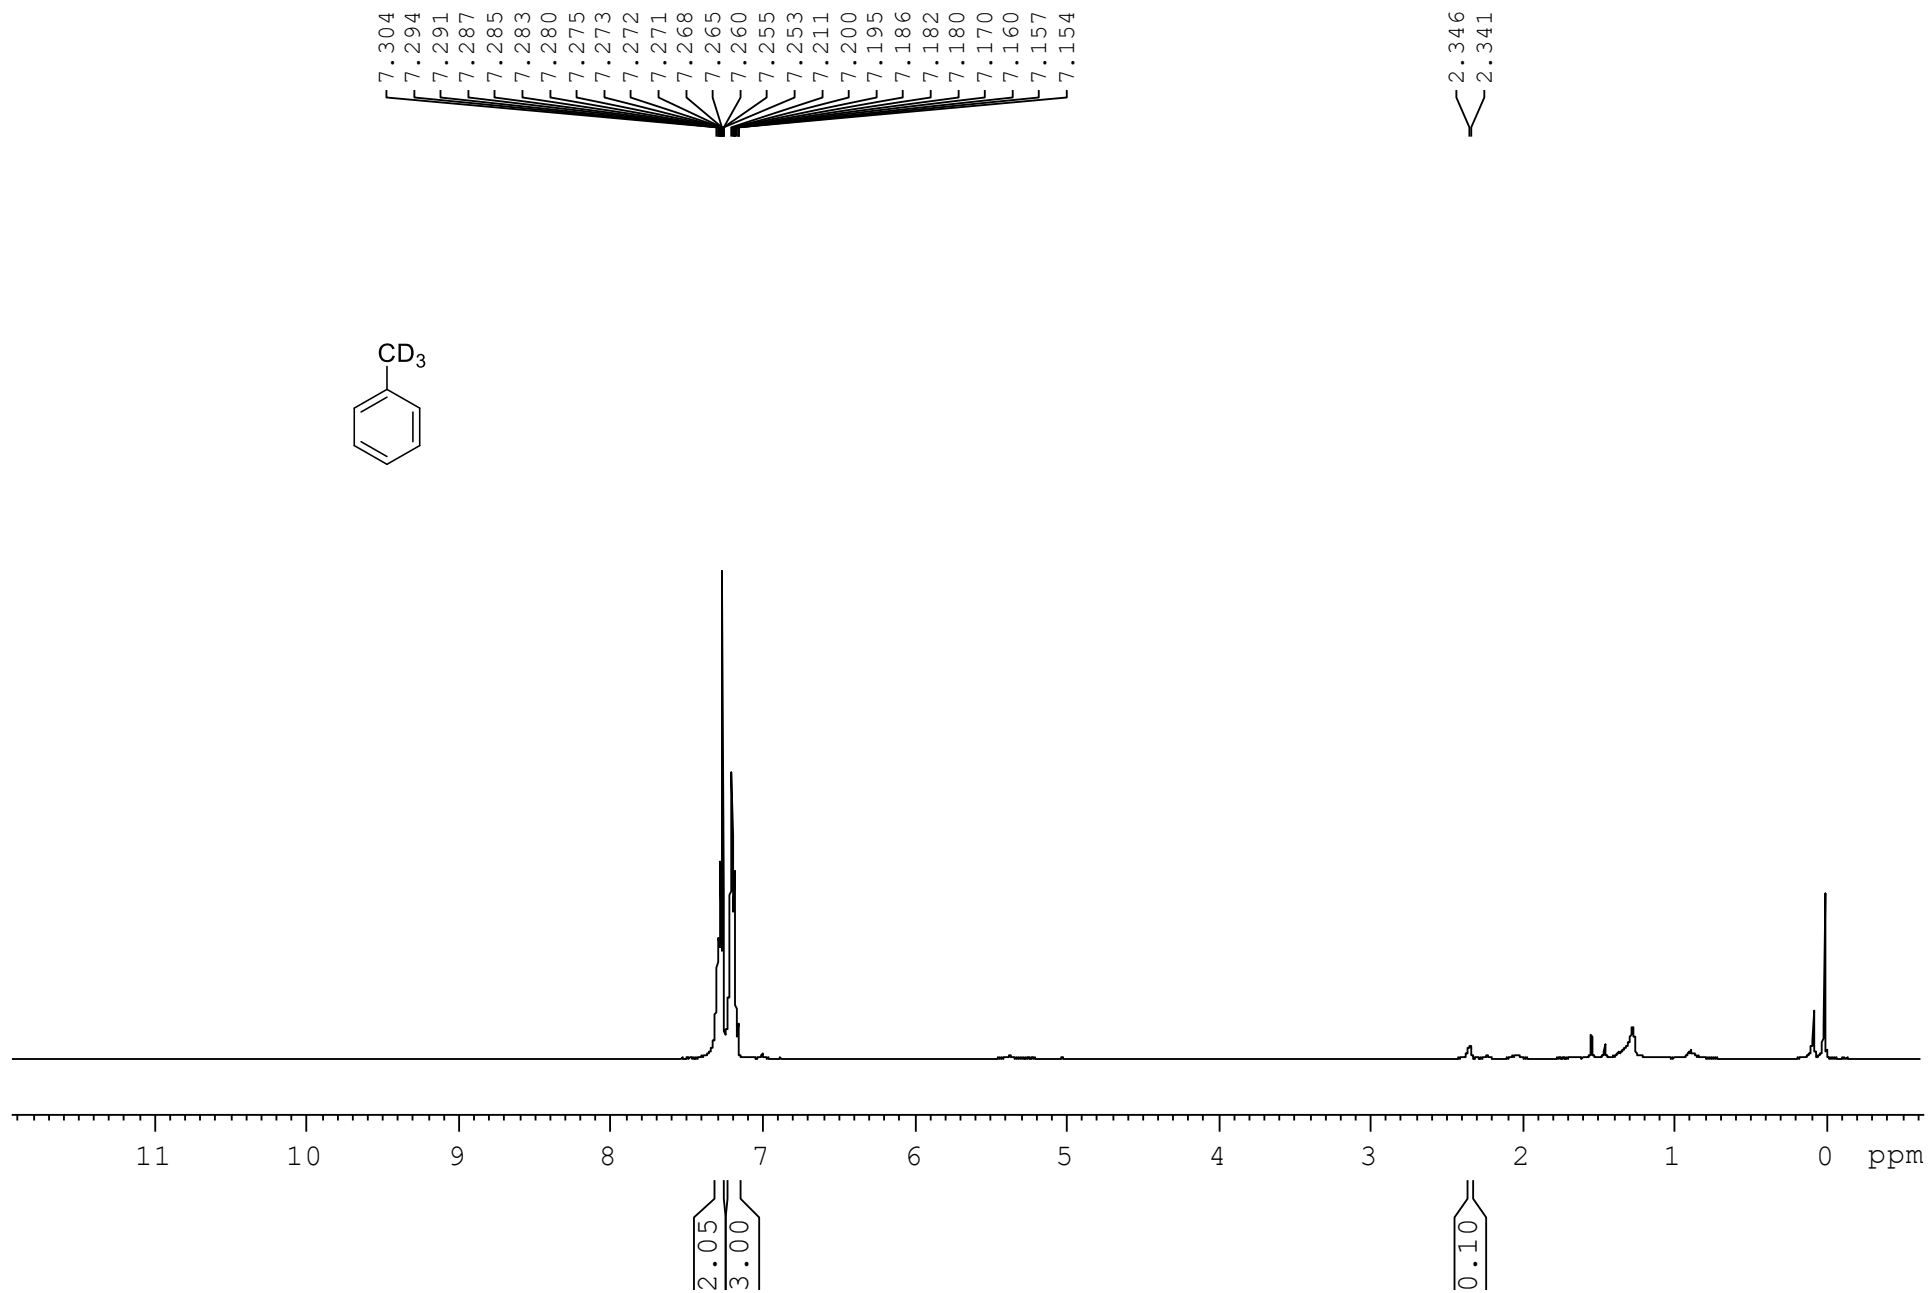

Figure S17. <sup>1</sup>H NMR spectra of 1e-d<sub>3</sub> (CDCl<sub>3</sub>, 400 M)

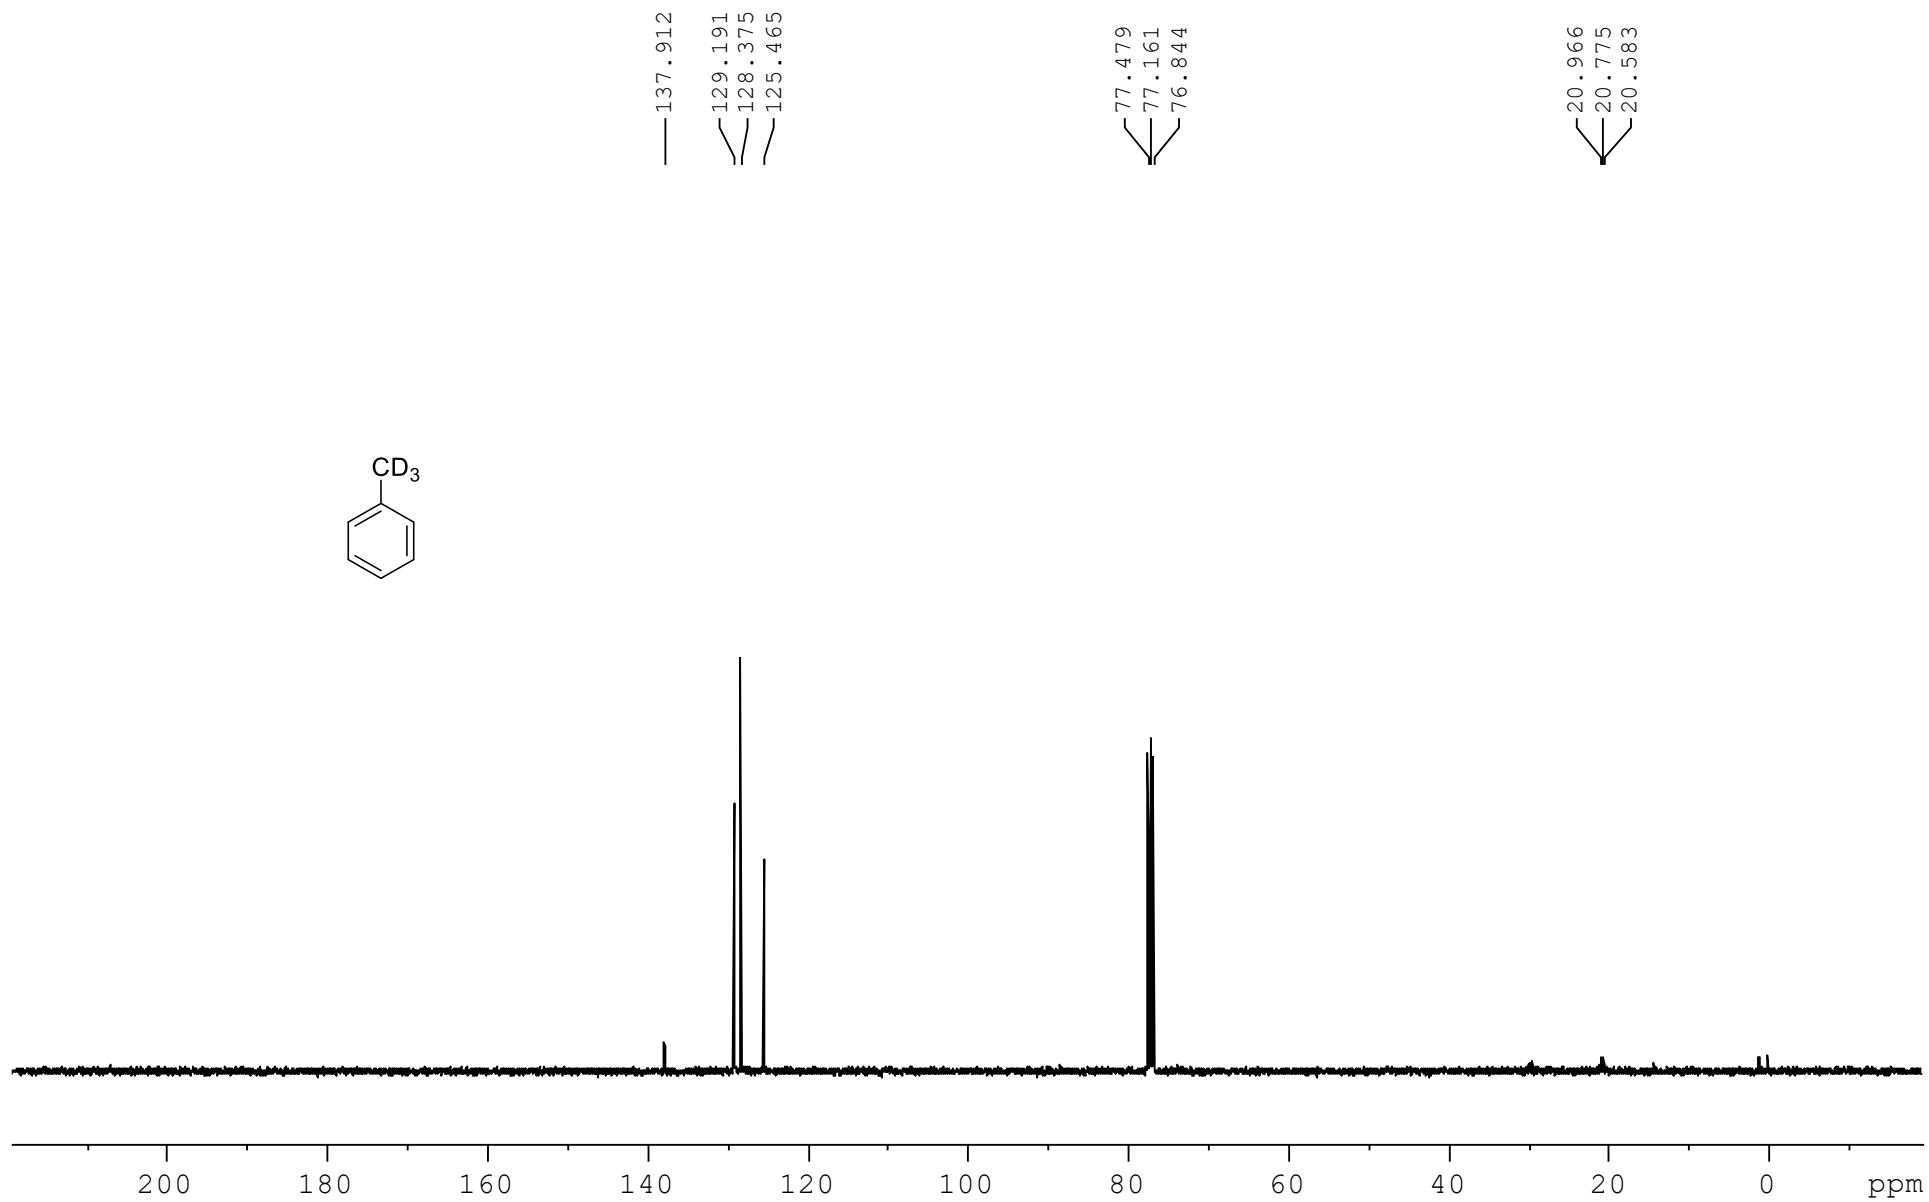

Figure S18. <sup>13</sup>C NMR spectra of 1e-d<sub>3</sub> (CDCl<sub>3</sub>, 100 M)

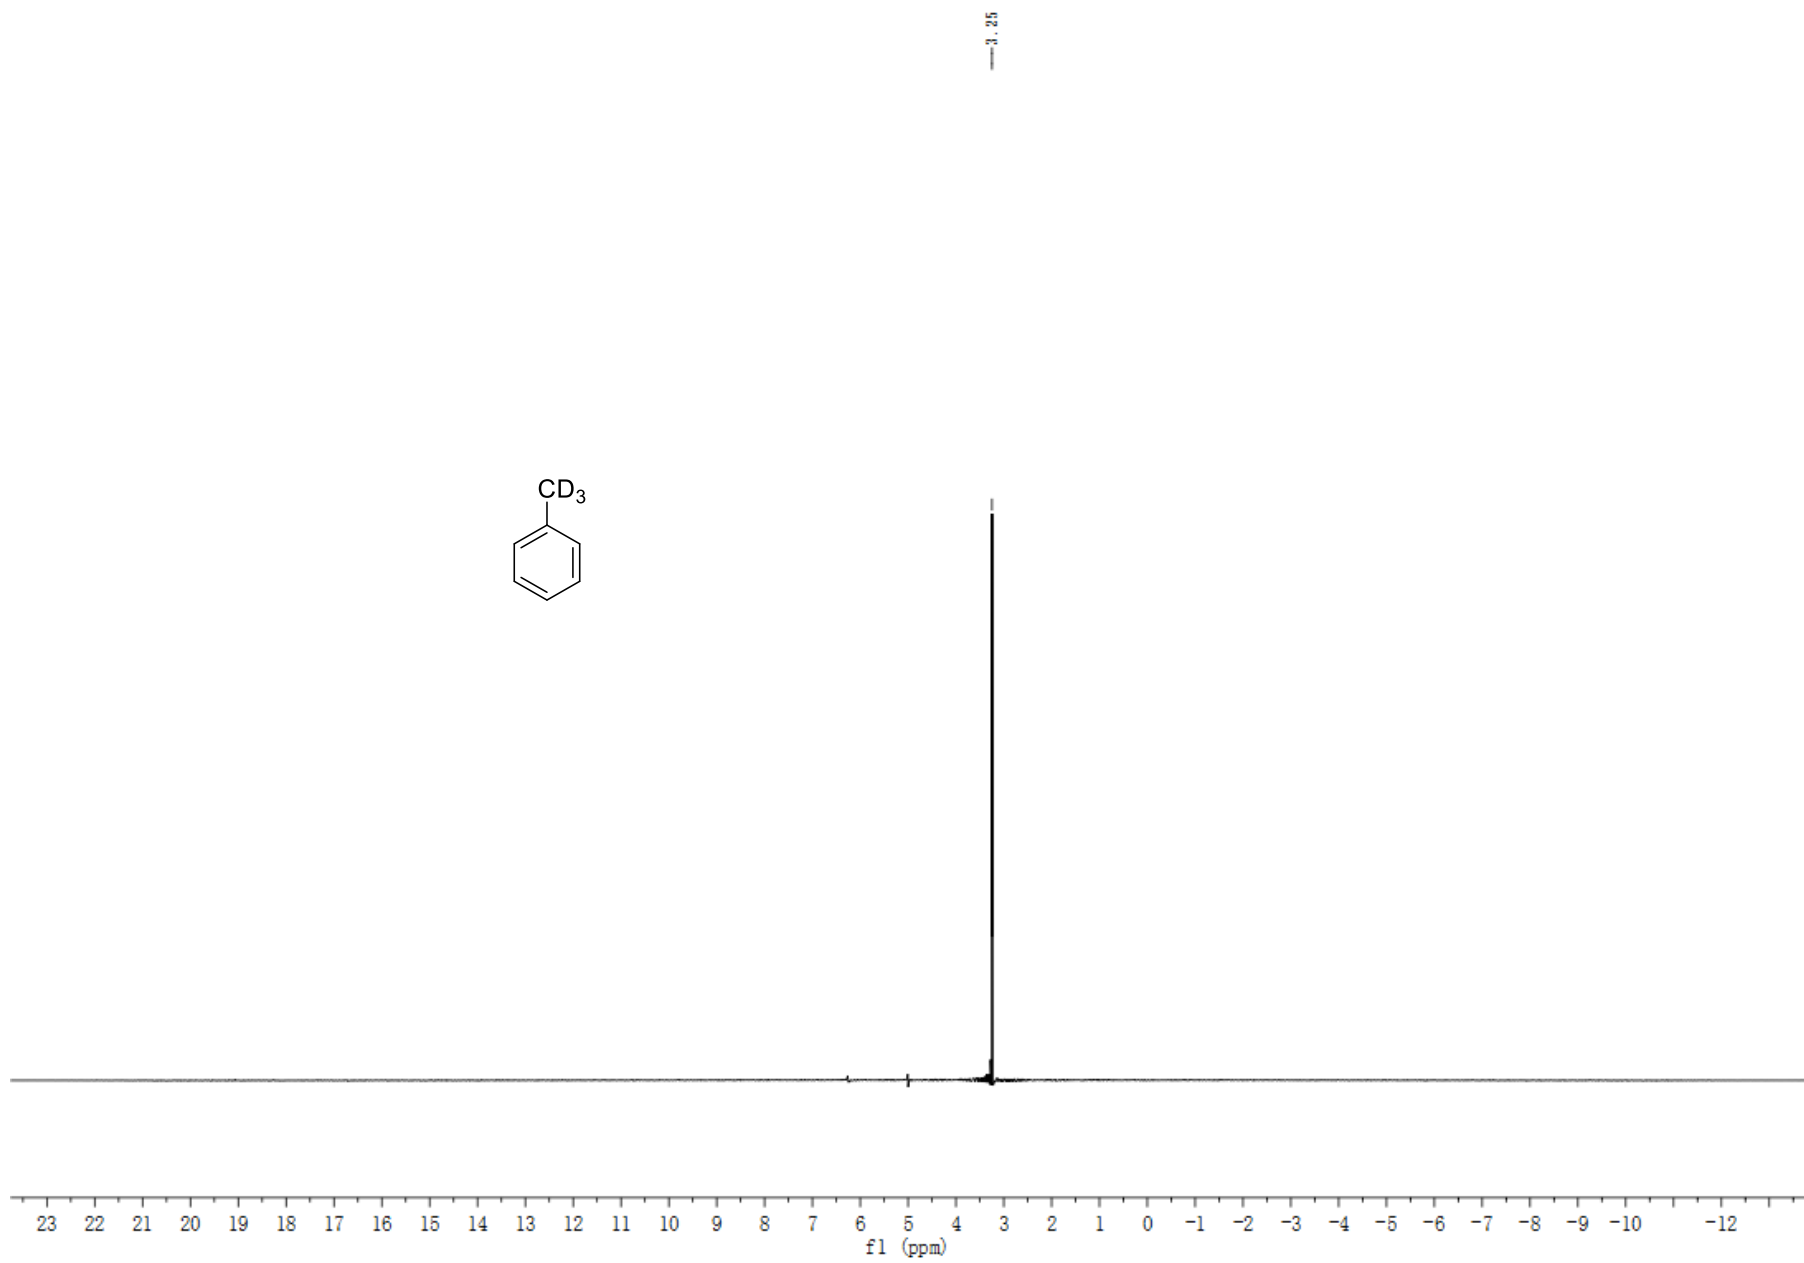

**Figure S19.**  $^2\text{H}$  NMR spectra of  $1\text{e-}d_3$  ( $\text{DCM}$ , 92 M)

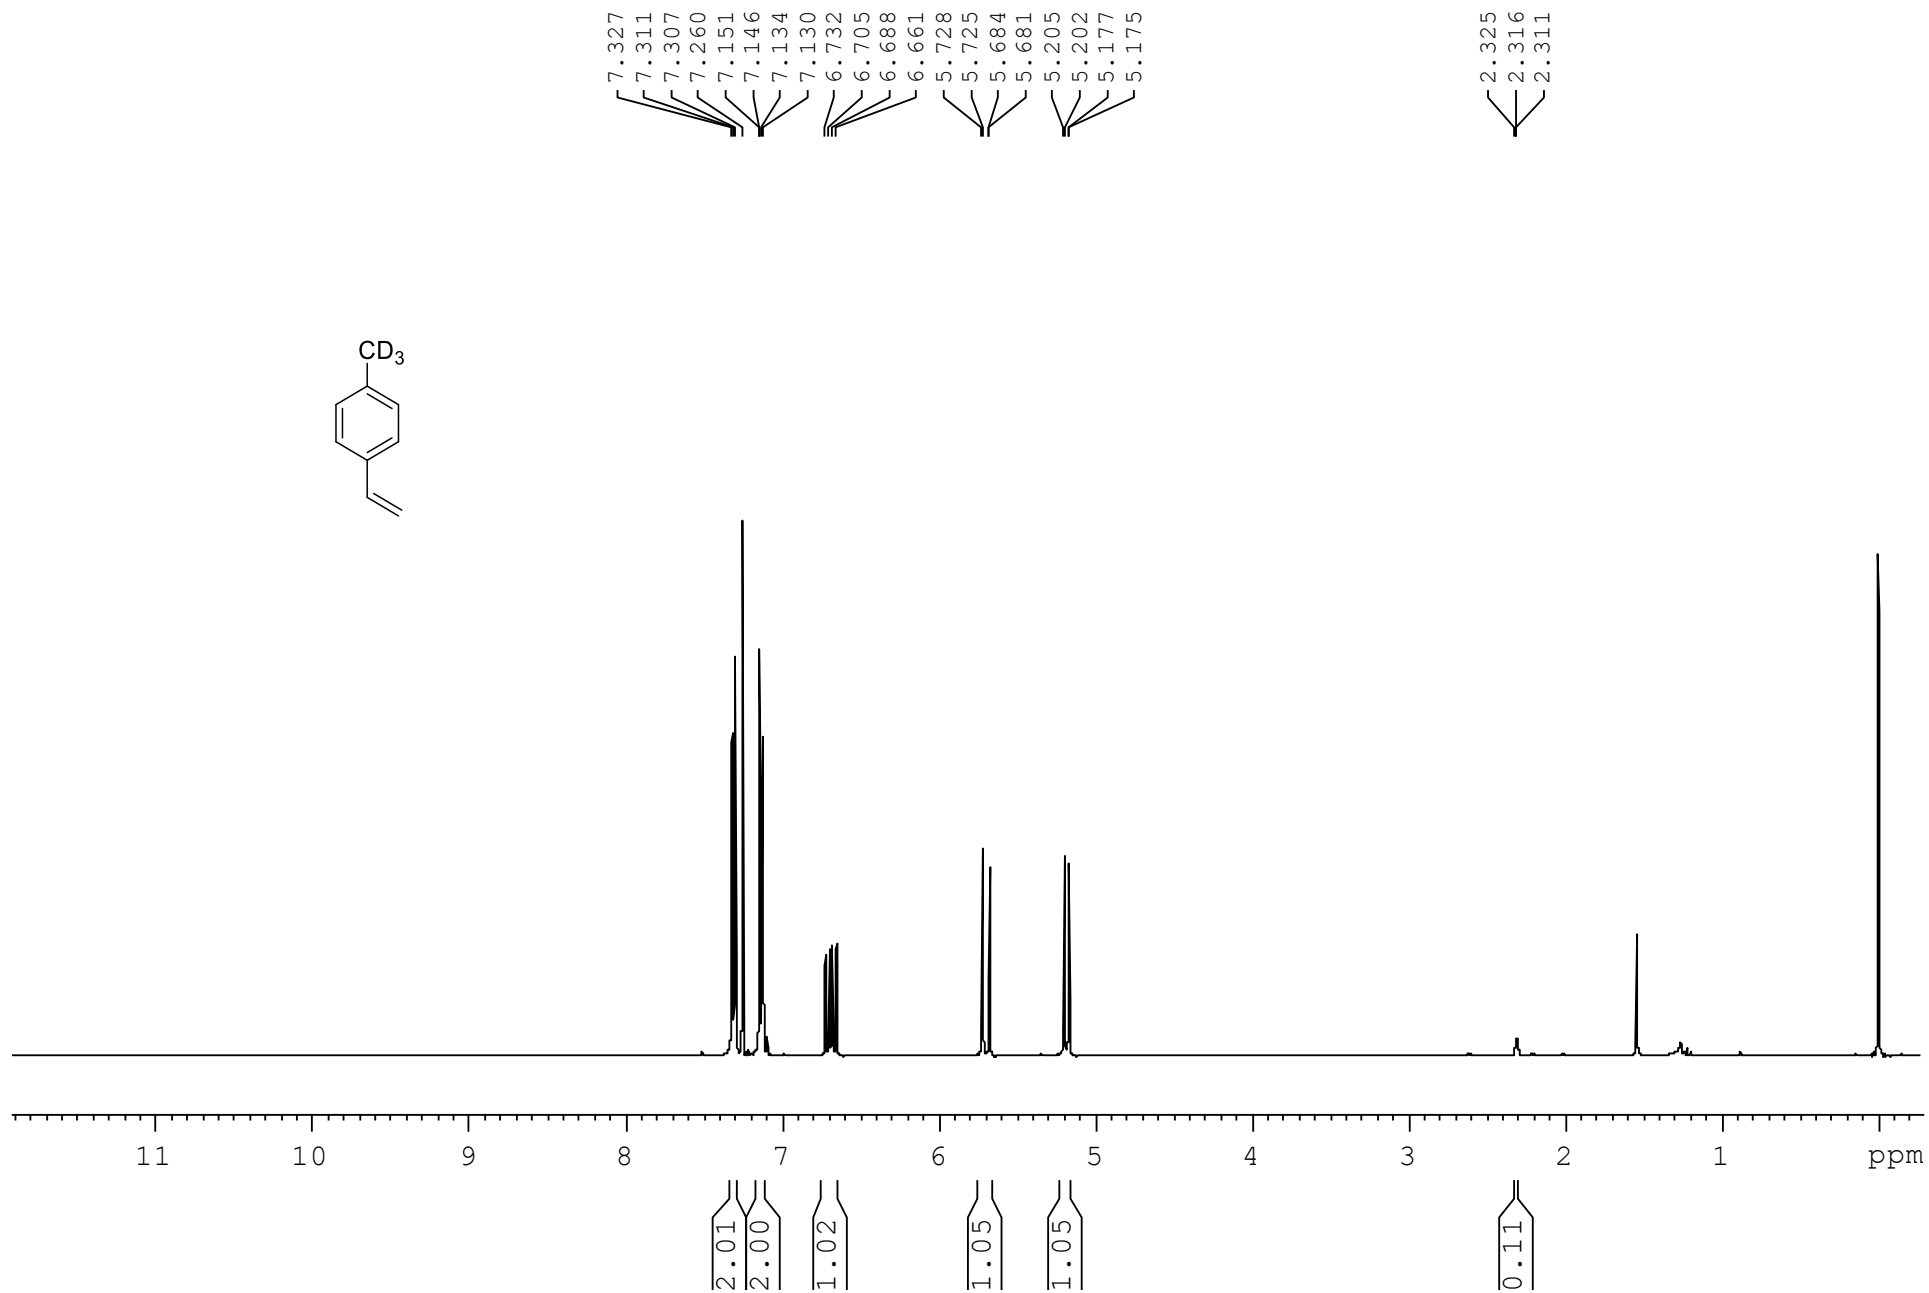

Figure S20. <sup>1</sup>H NMR spectra of **1f-d<sub>3</sub>** (CDCl<sub>3</sub>, 400 M)

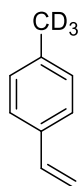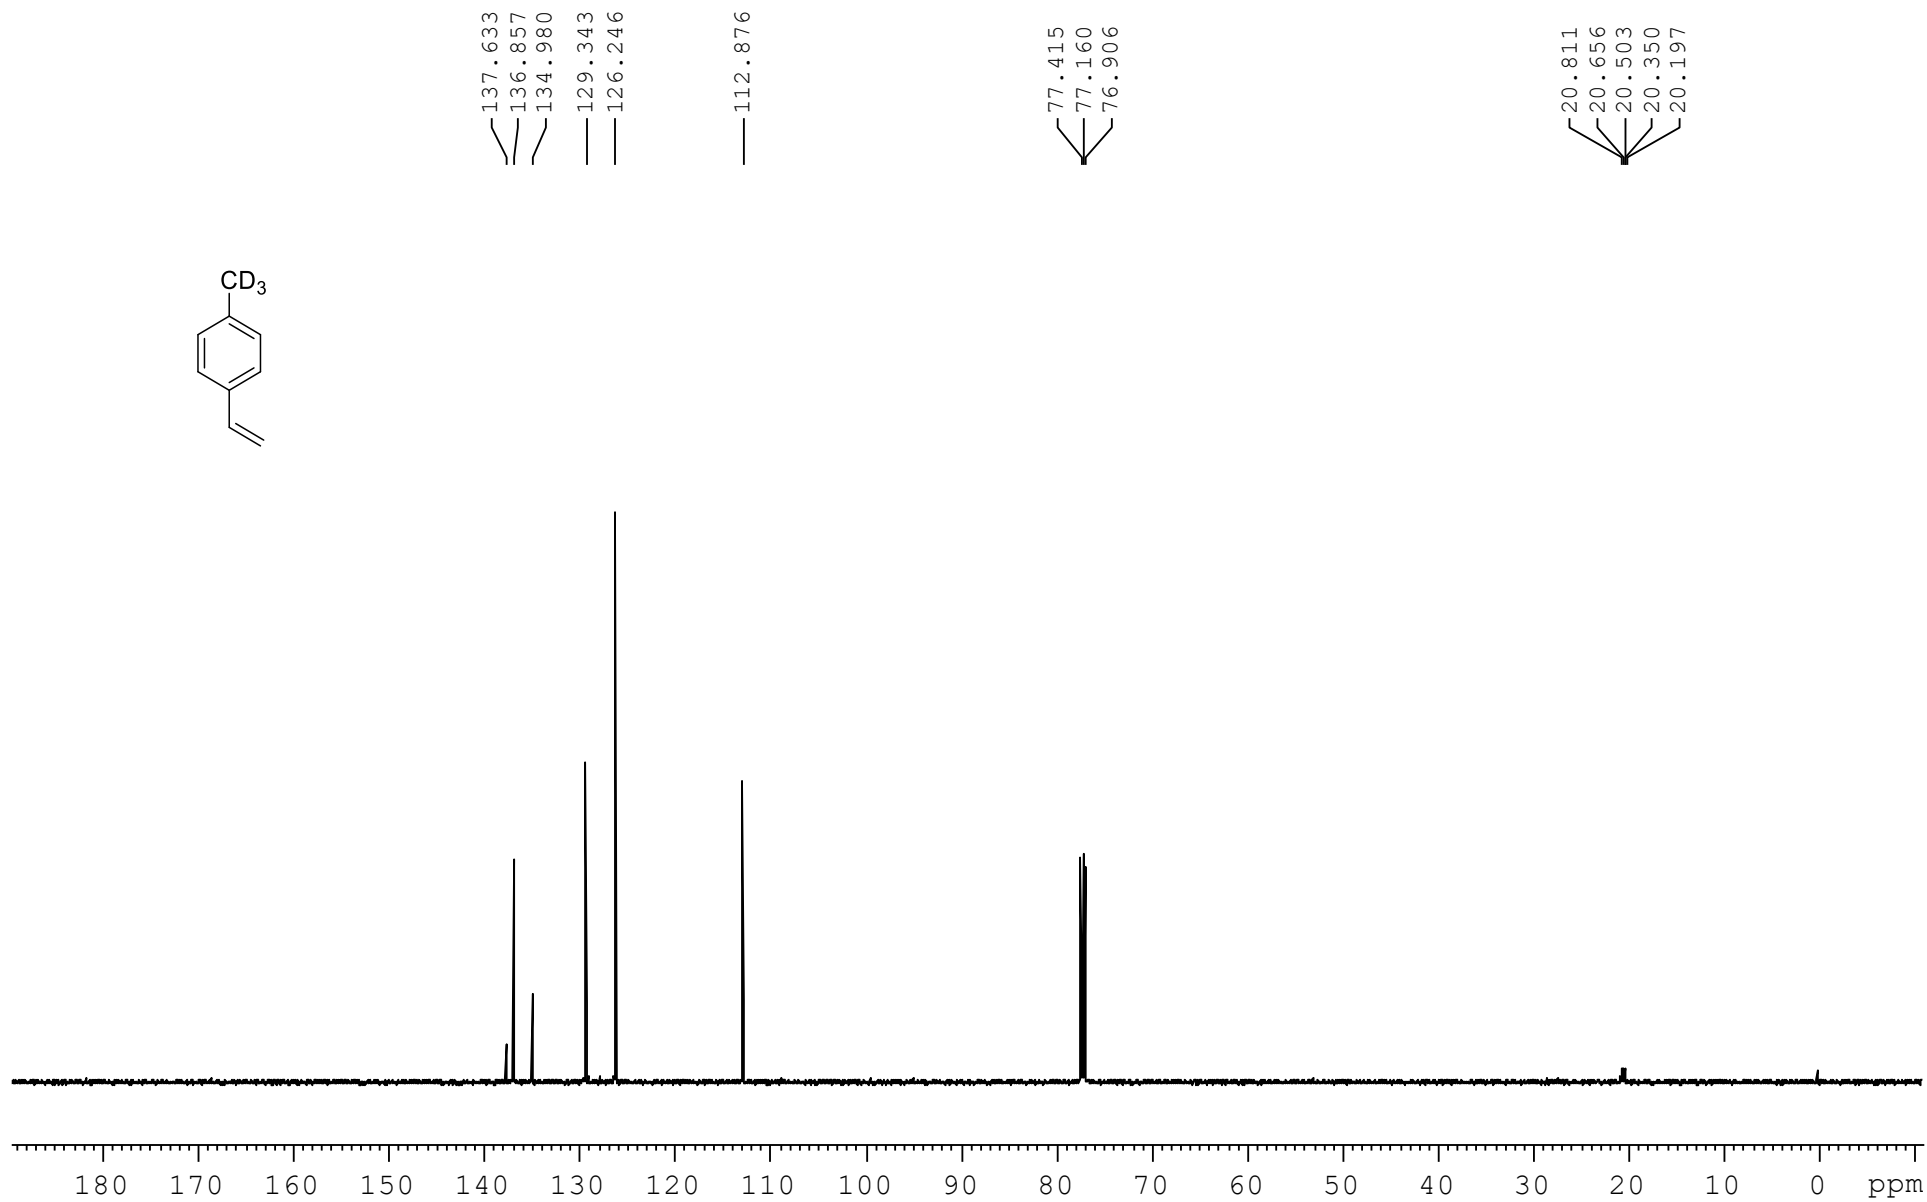

Figure S21. <sup>13</sup>C NMR spectra of **1f-d<sub>3</sub>** (CDCl<sub>3</sub>, 125 M)



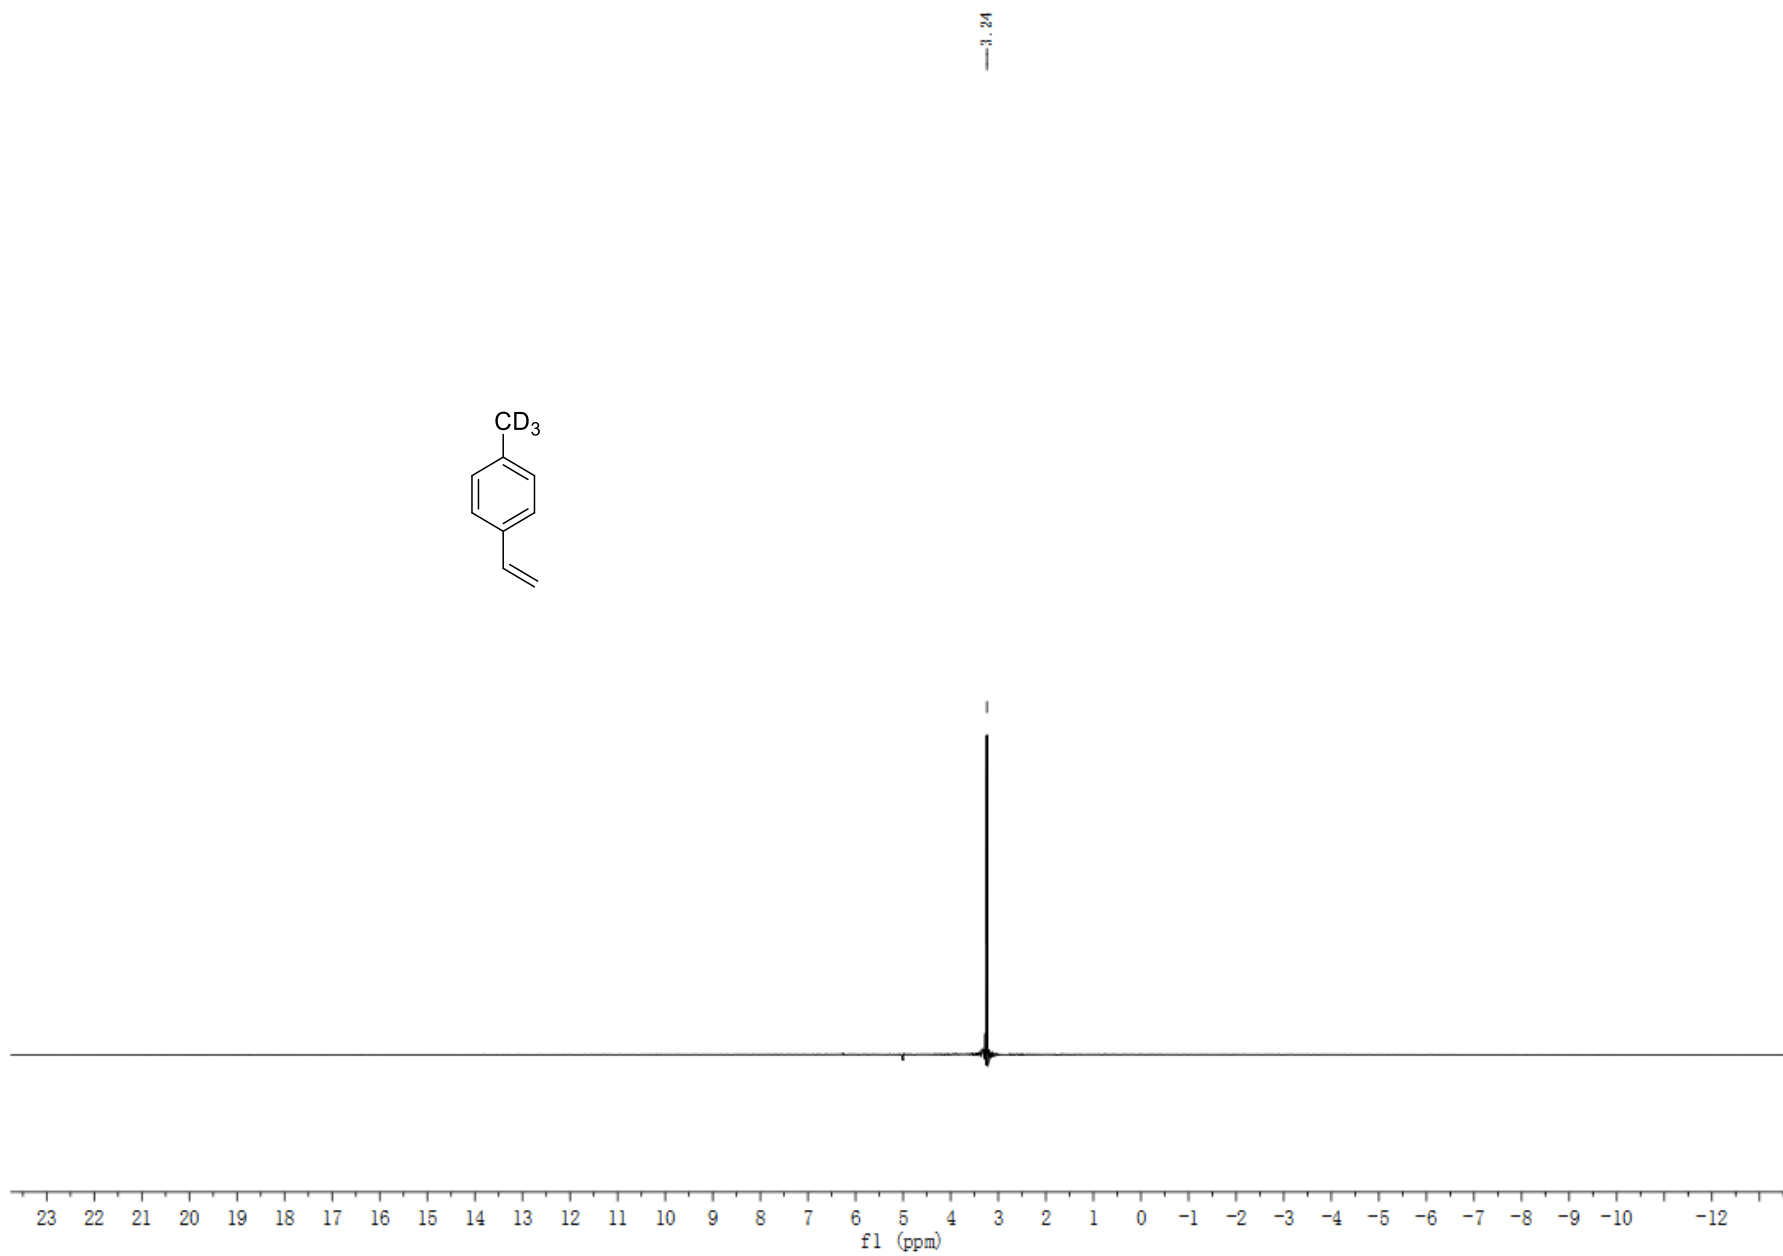

**Figure S22.**  $^2\text{H}$  NMR spectra of **1f- $d_3$**  ( $\text{DCM}$ , 92 M)

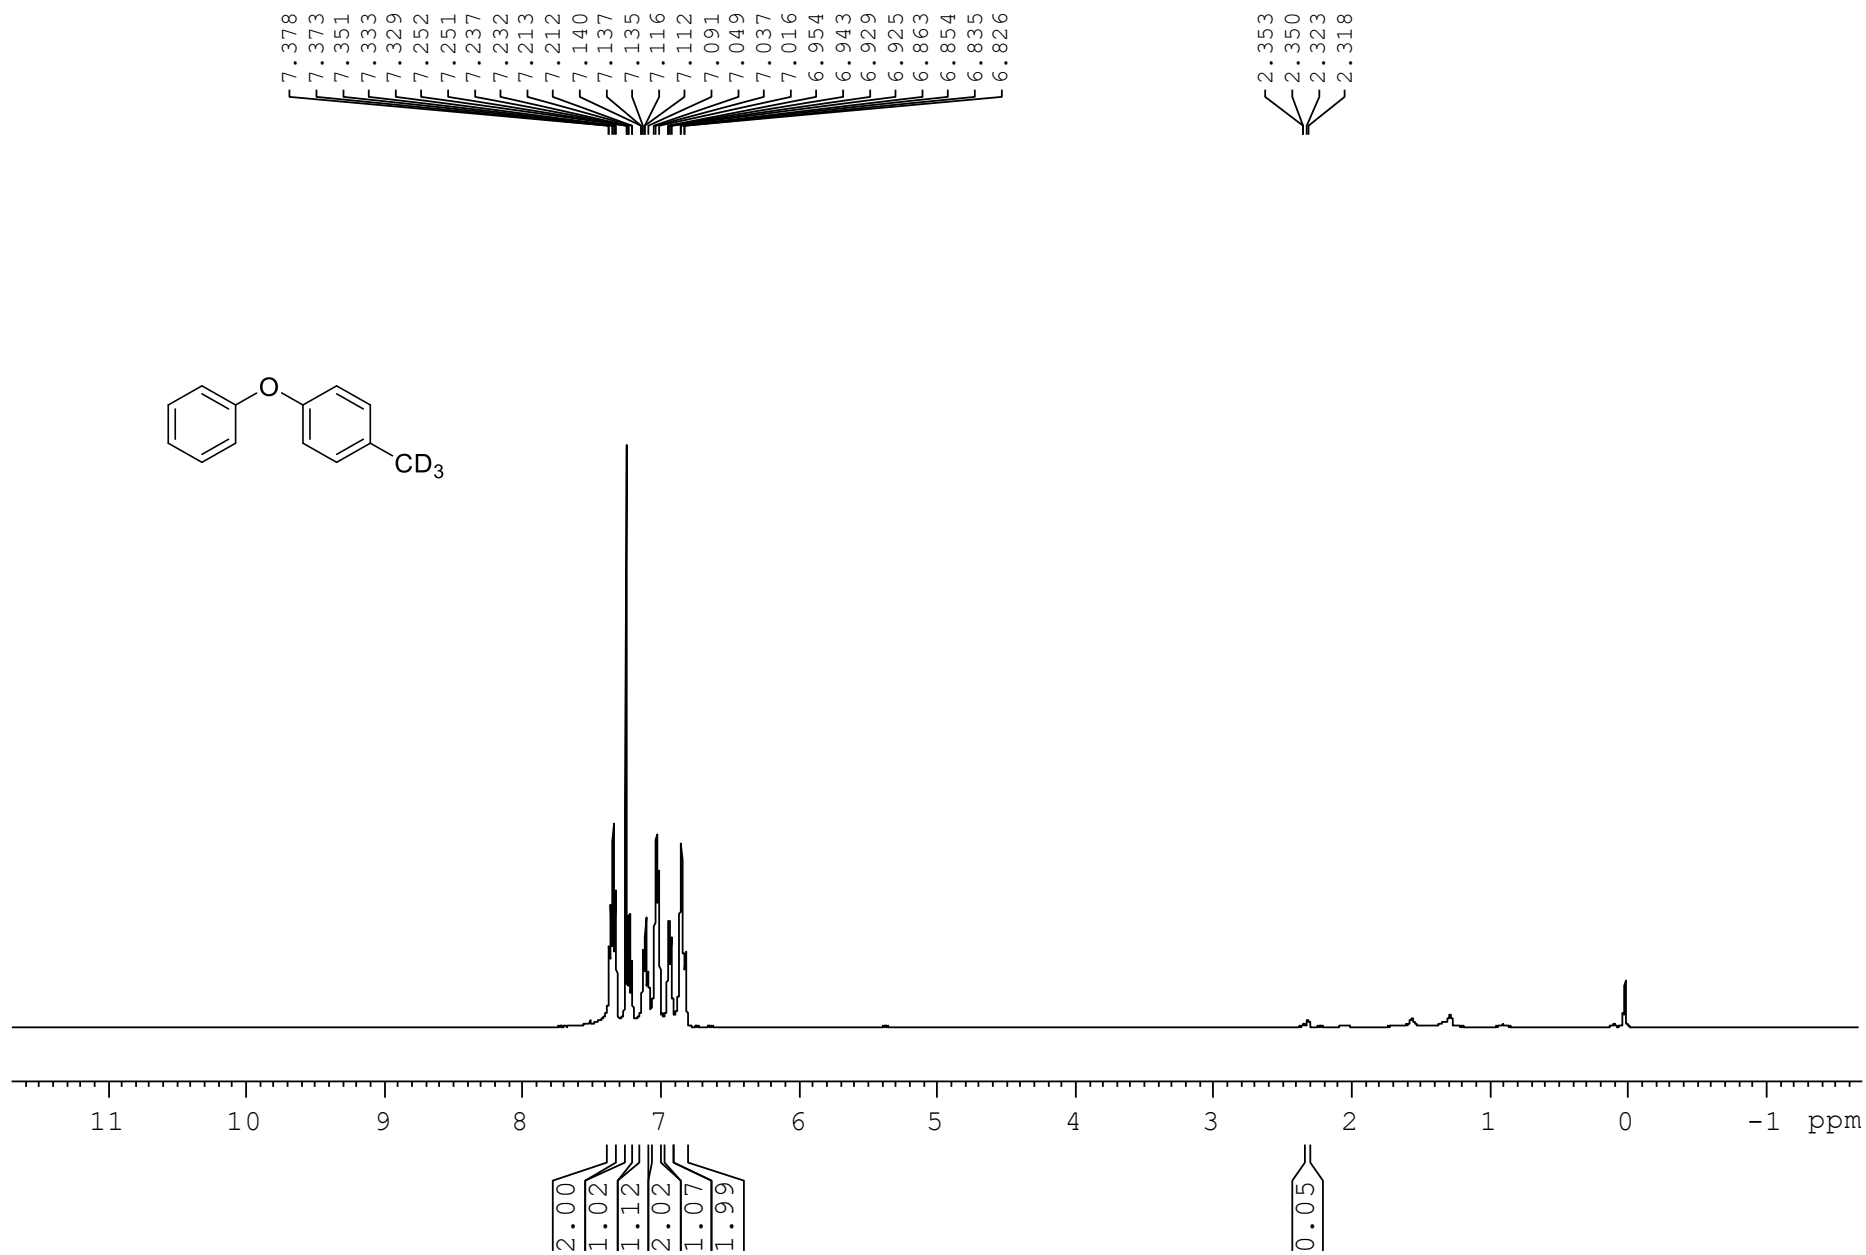

Figure S23. <sup>1</sup>H NMR spectra of **1g-d<sub>3</sub>** (CDCl<sub>3</sub>, 400 M)

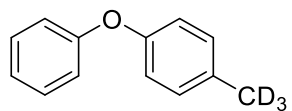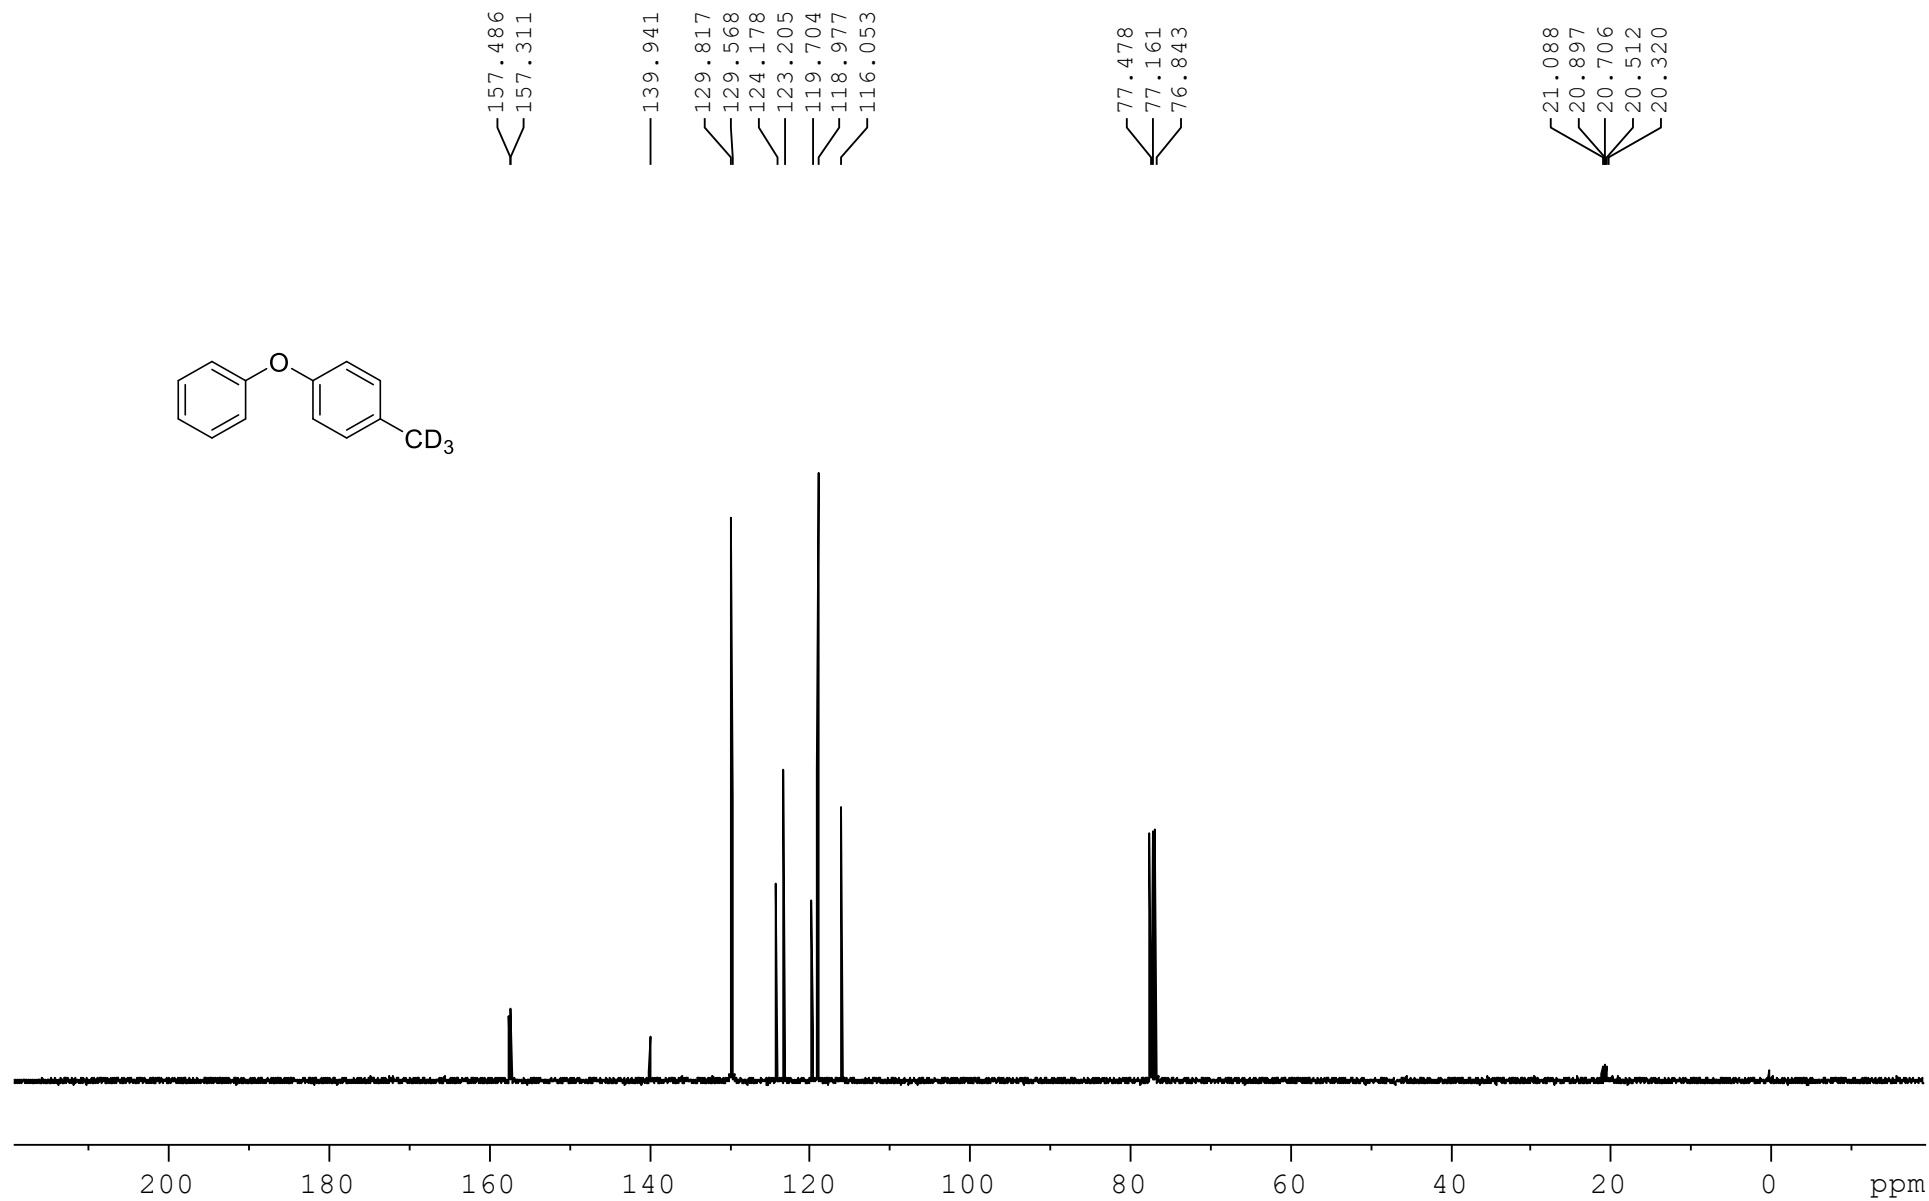

Figure S24. <sup>13</sup>C NMR spectra of **1g-d<sub>3</sub>** (CDCl<sub>3</sub>, 100 M)

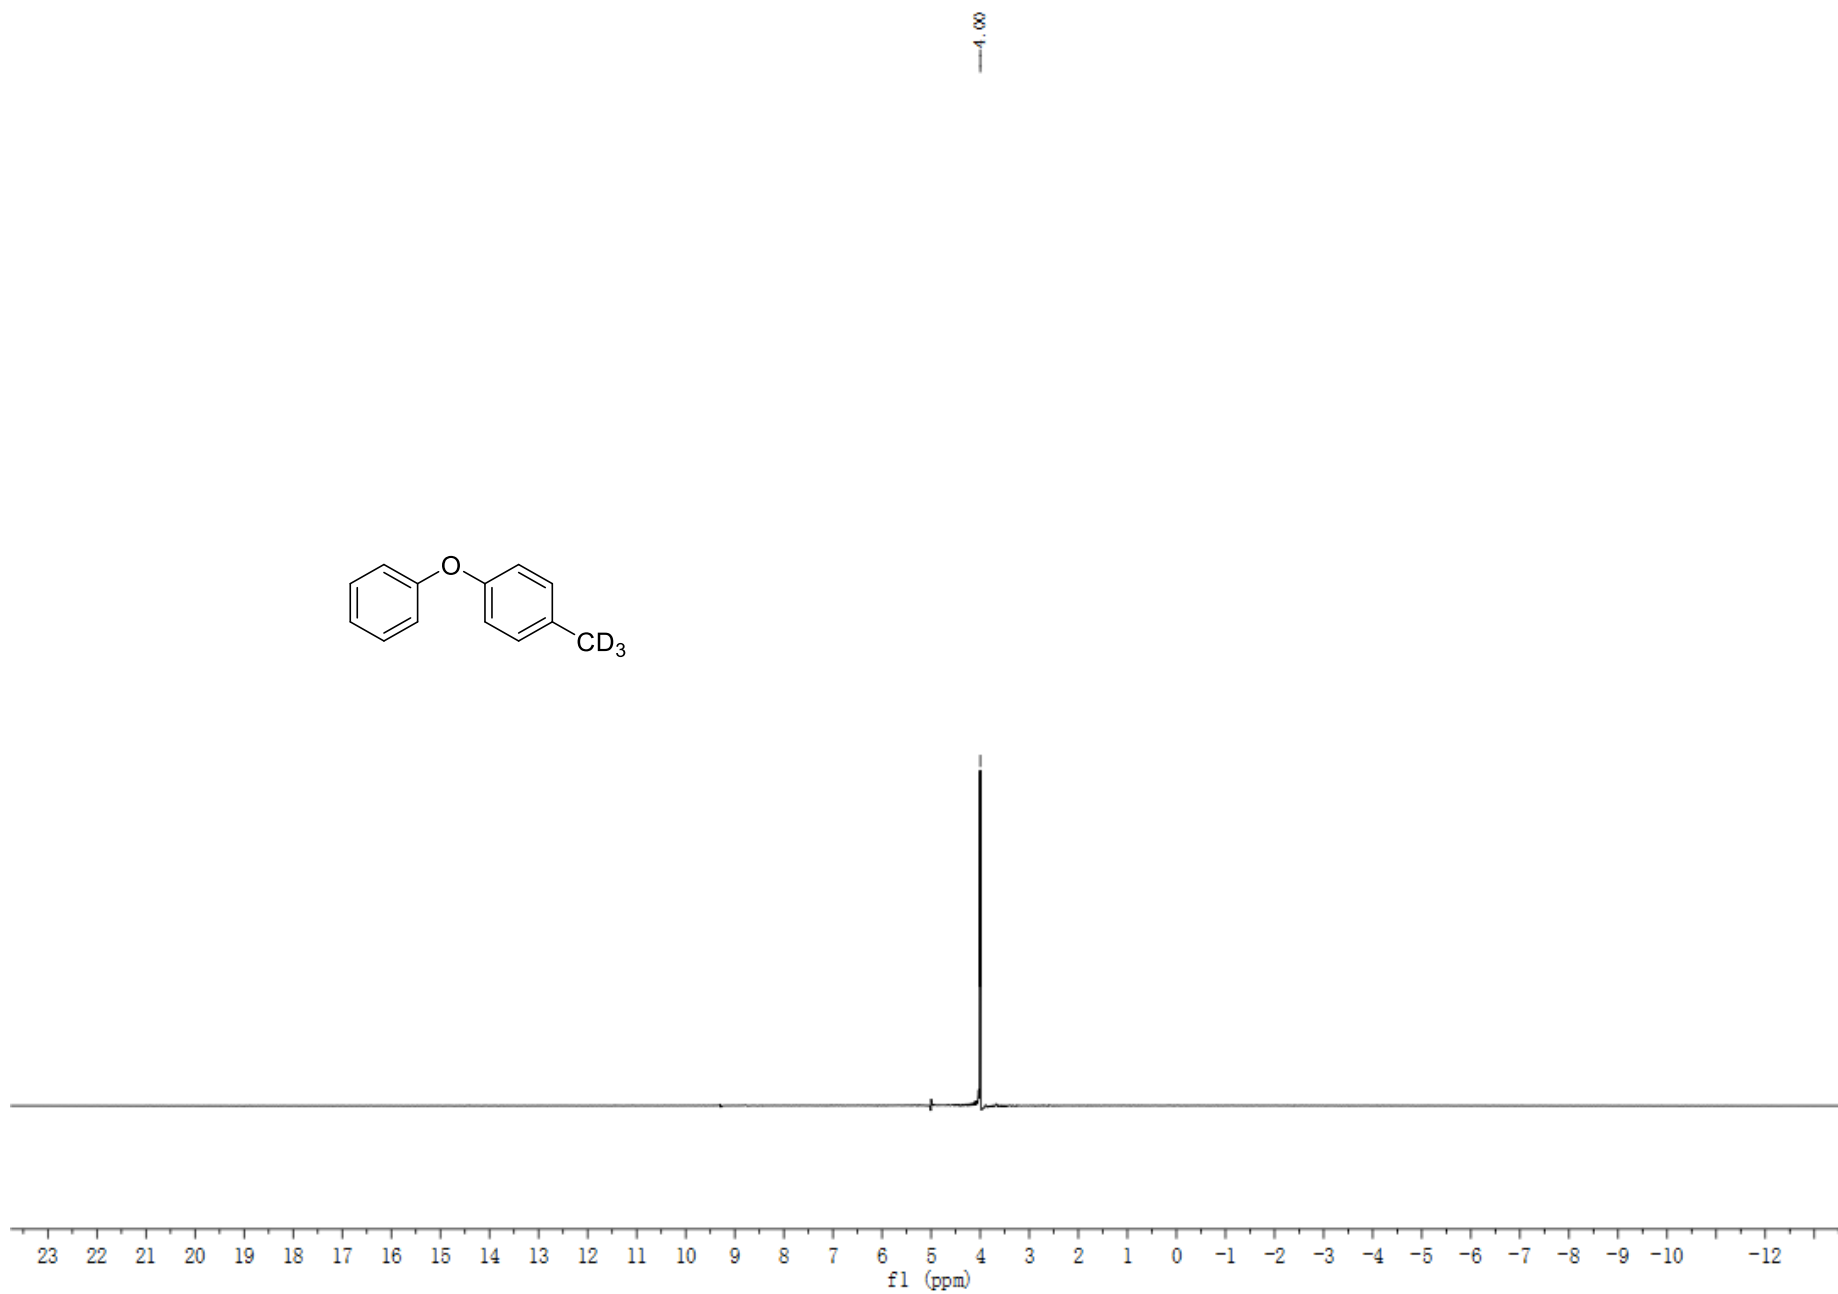

**Figure S25.**  $^2\text{H}$  NMR spectra of **1g-d<sub>3</sub>** ( $\text{MeCN}$ , 92 M)

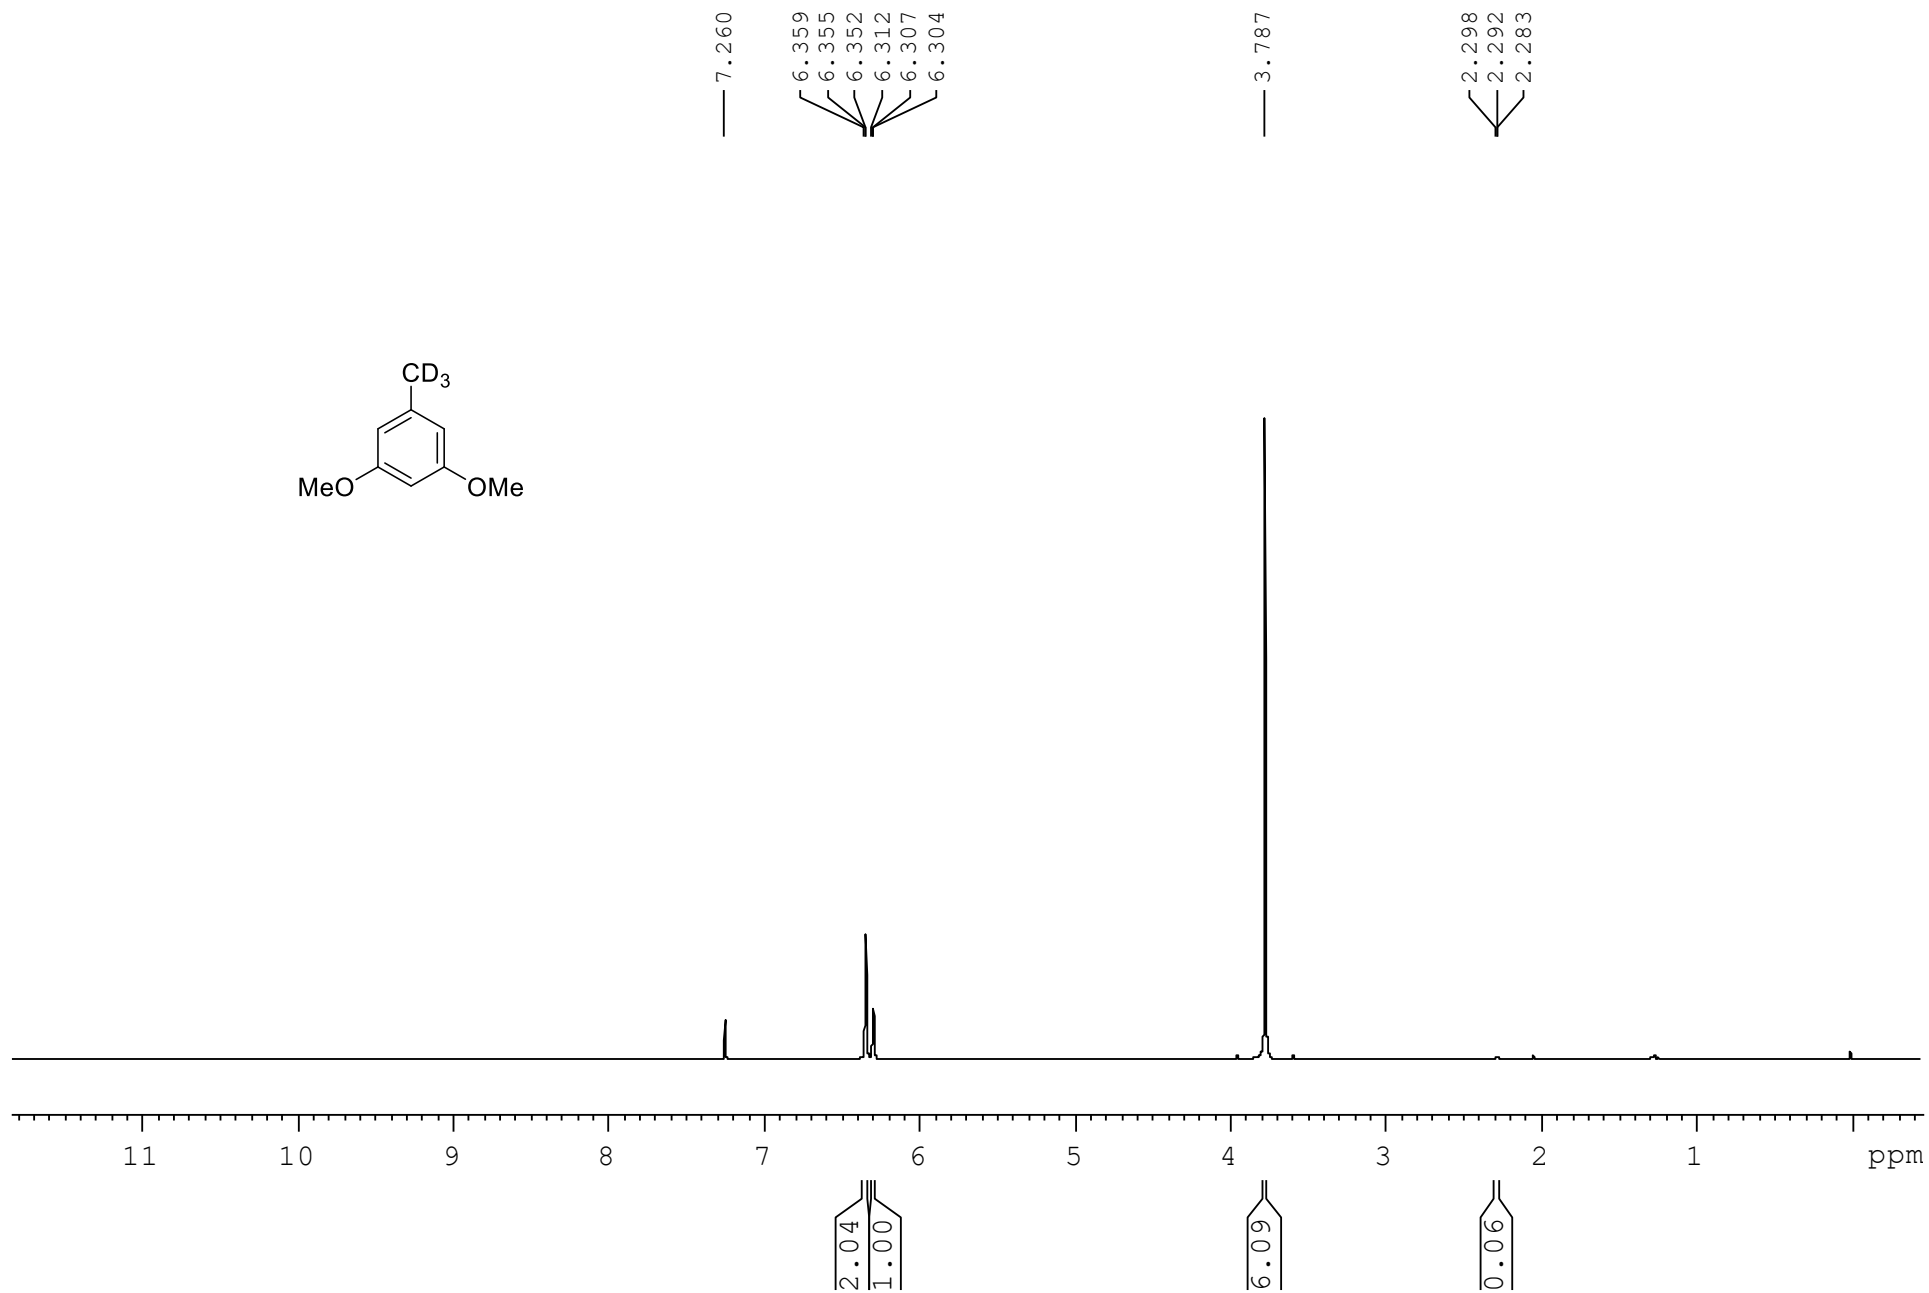

**Figure S26.** <sup>1</sup>H NMR spectra of **1h-d<sub>3</sub>** (CDCl<sub>3</sub>, 400 M)

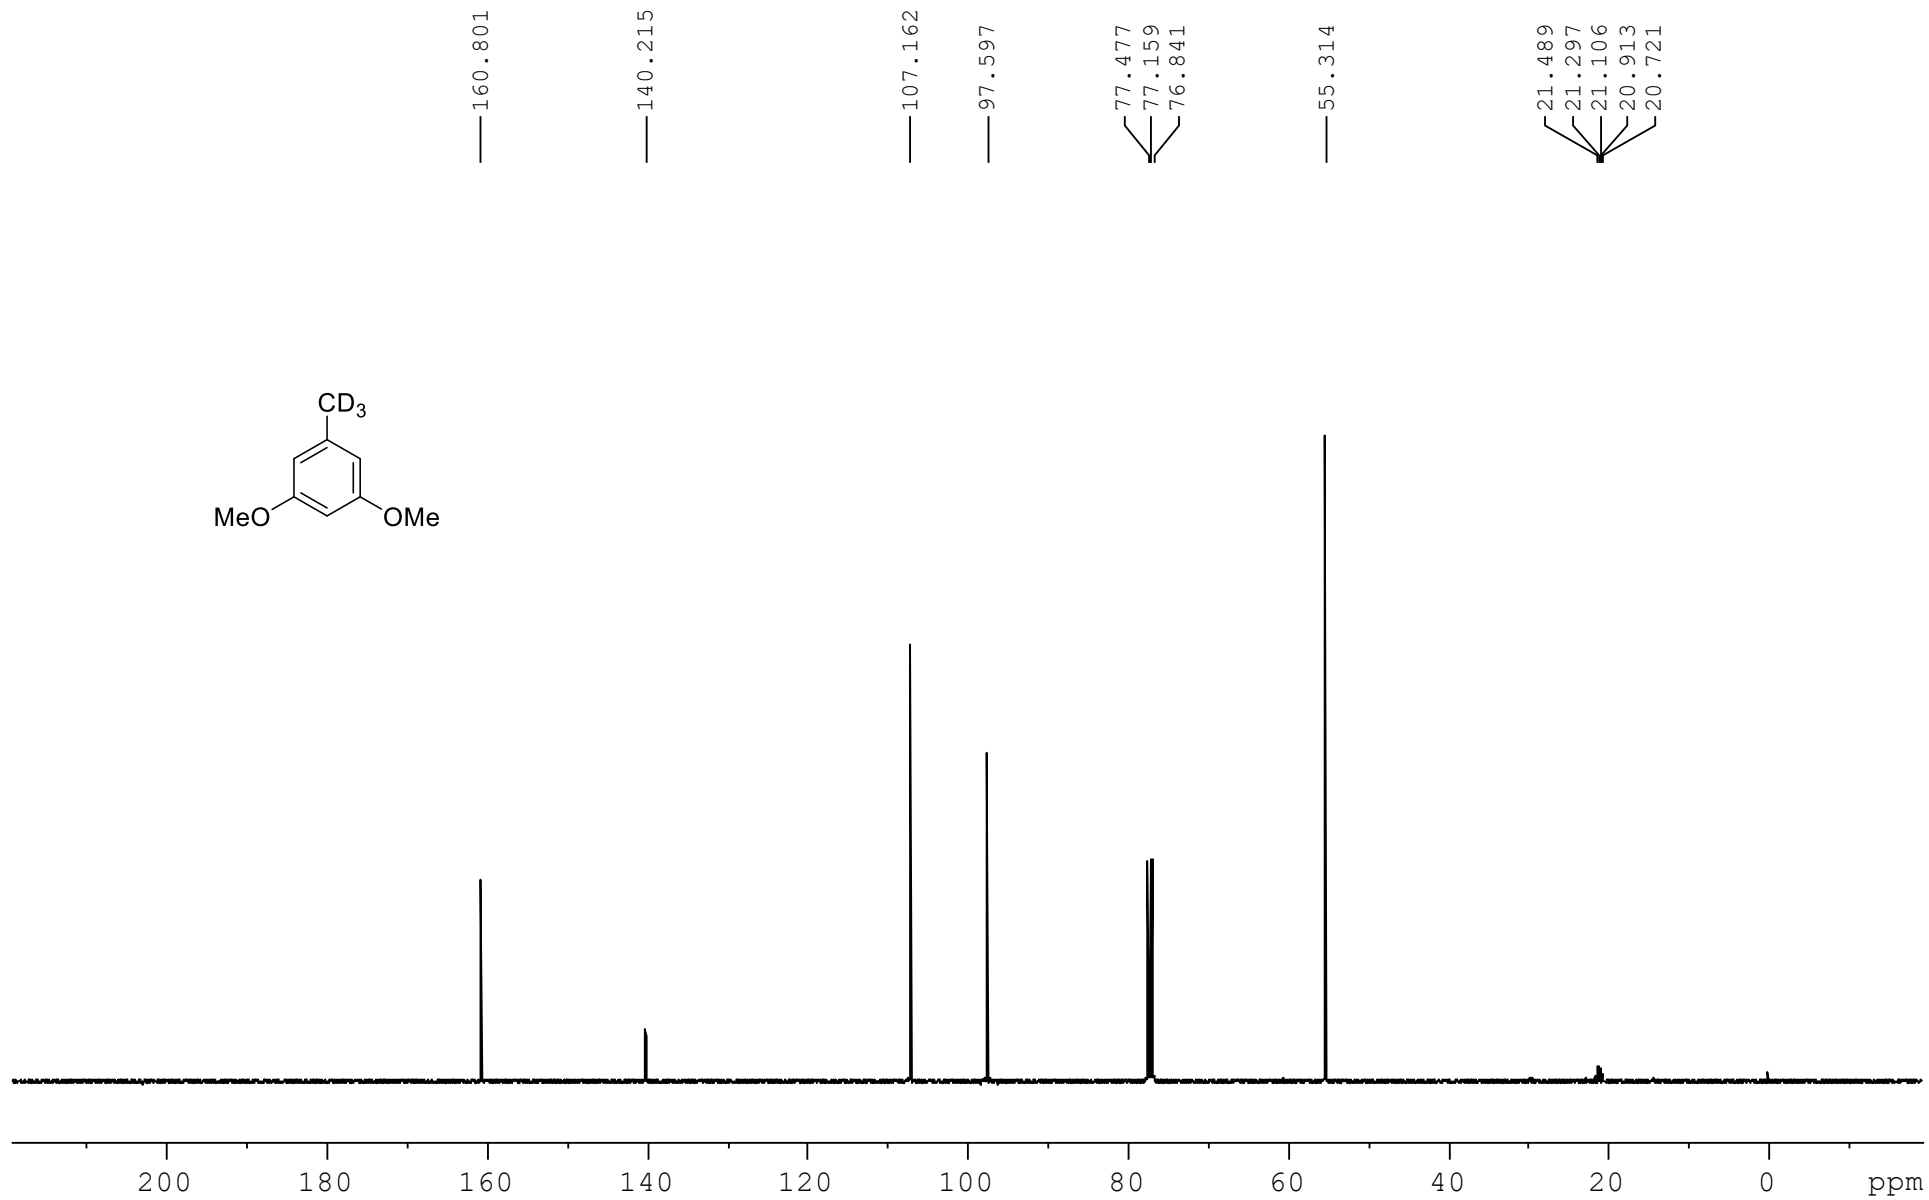

Figure S27. <sup>13</sup>C NMR spectra of **1h-d<sub>3</sub>** (CDCl<sub>3</sub>, 100 M)

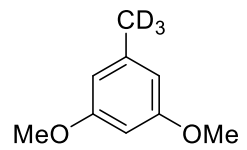

3.97

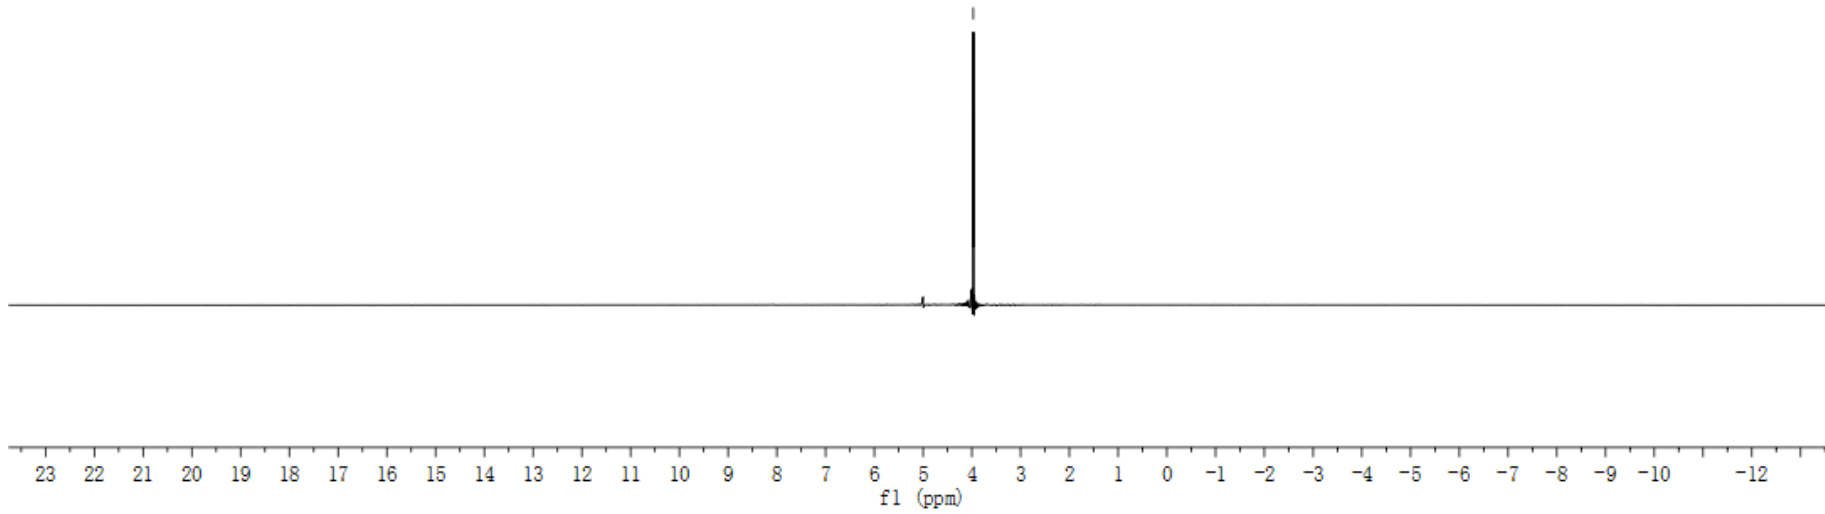

**Figure S28.** <sup>2</sup>H NMR spectra of **1h-d<sub>3</sub>** (MeCN, 92 M)

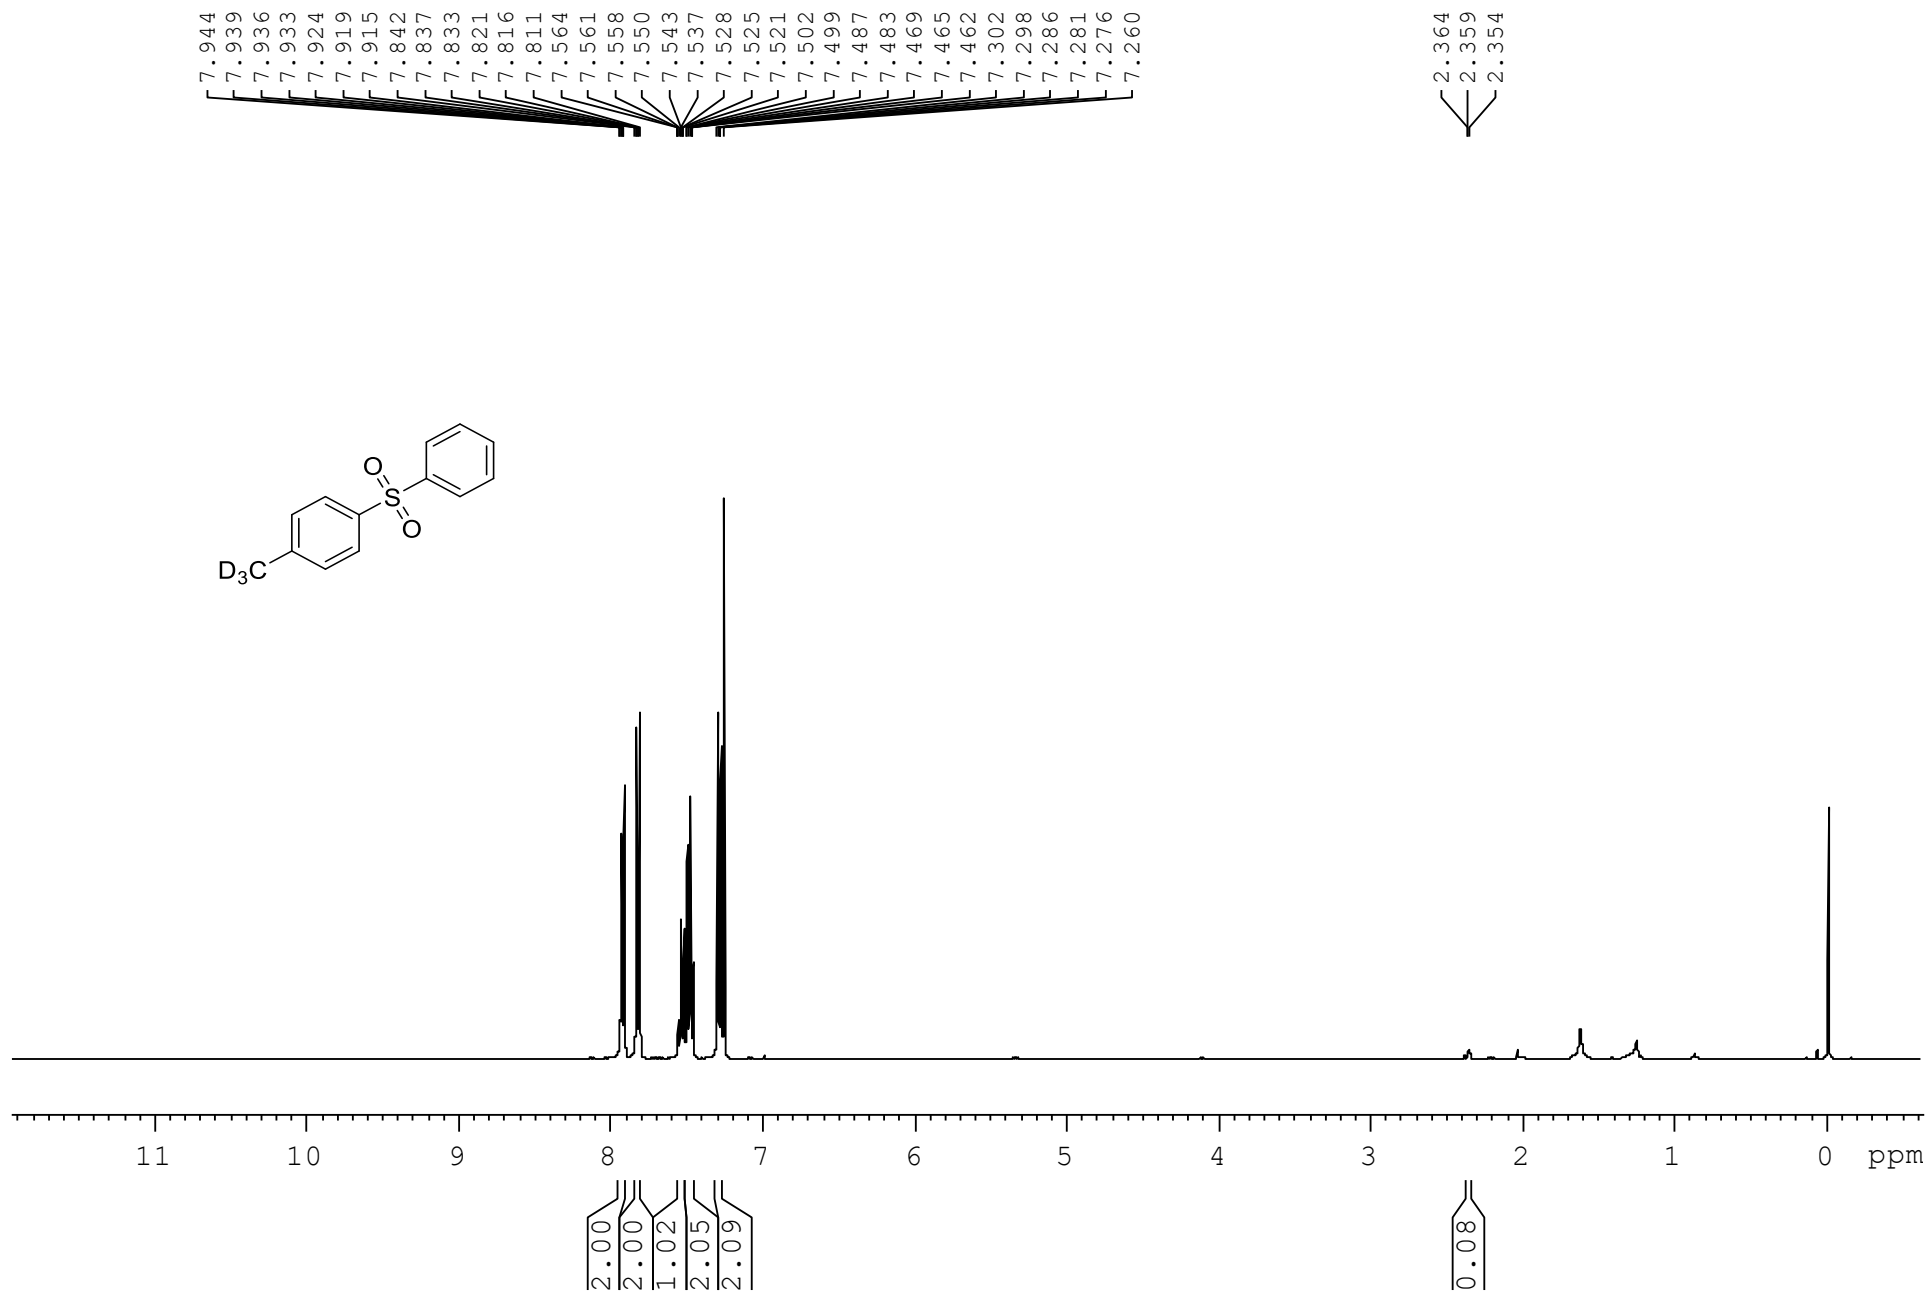

Figure S29. <sup>1</sup>H NMR spectra of **1i-d<sub>3</sub>** (CDCl<sub>3</sub>, 400 M)



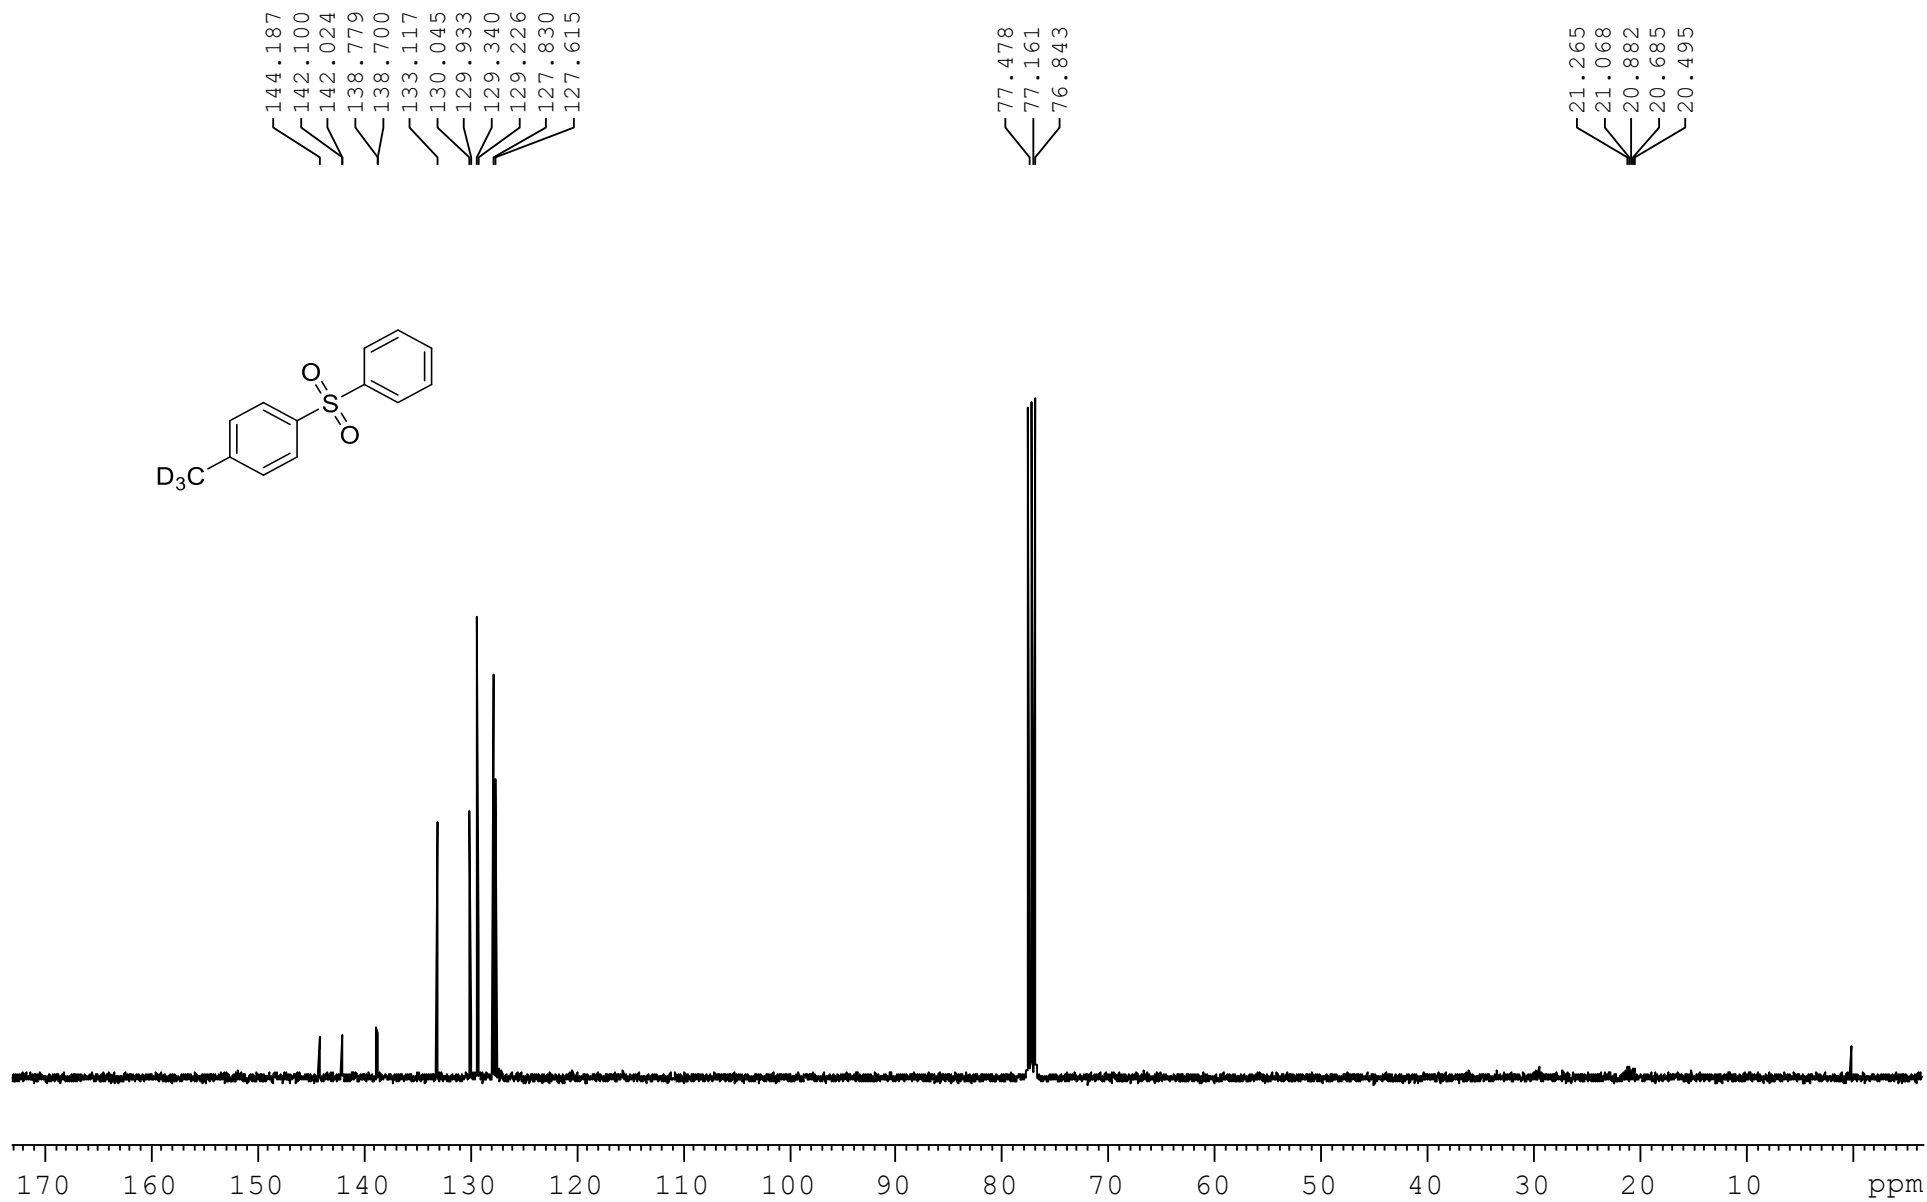

Figure S30. <sup>13</sup>C NMR spectra of **1i-d<sub>3</sub>** (CDCl<sub>3</sub>, 100 M)

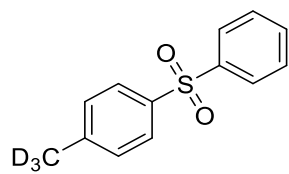

4.12

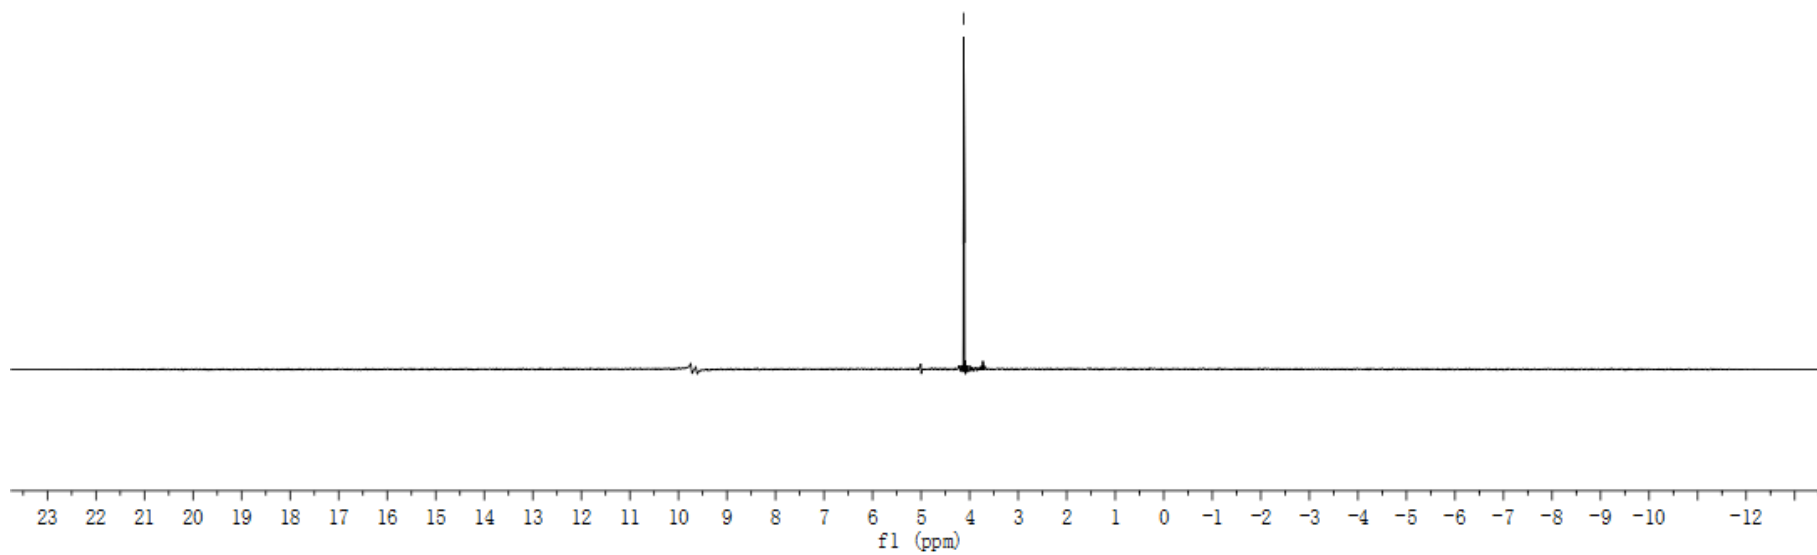

Figure S31.  $^2\text{H}$  NMR spectra of  $\mathbf{1i-d}_3$  (MeCN, 92 M)

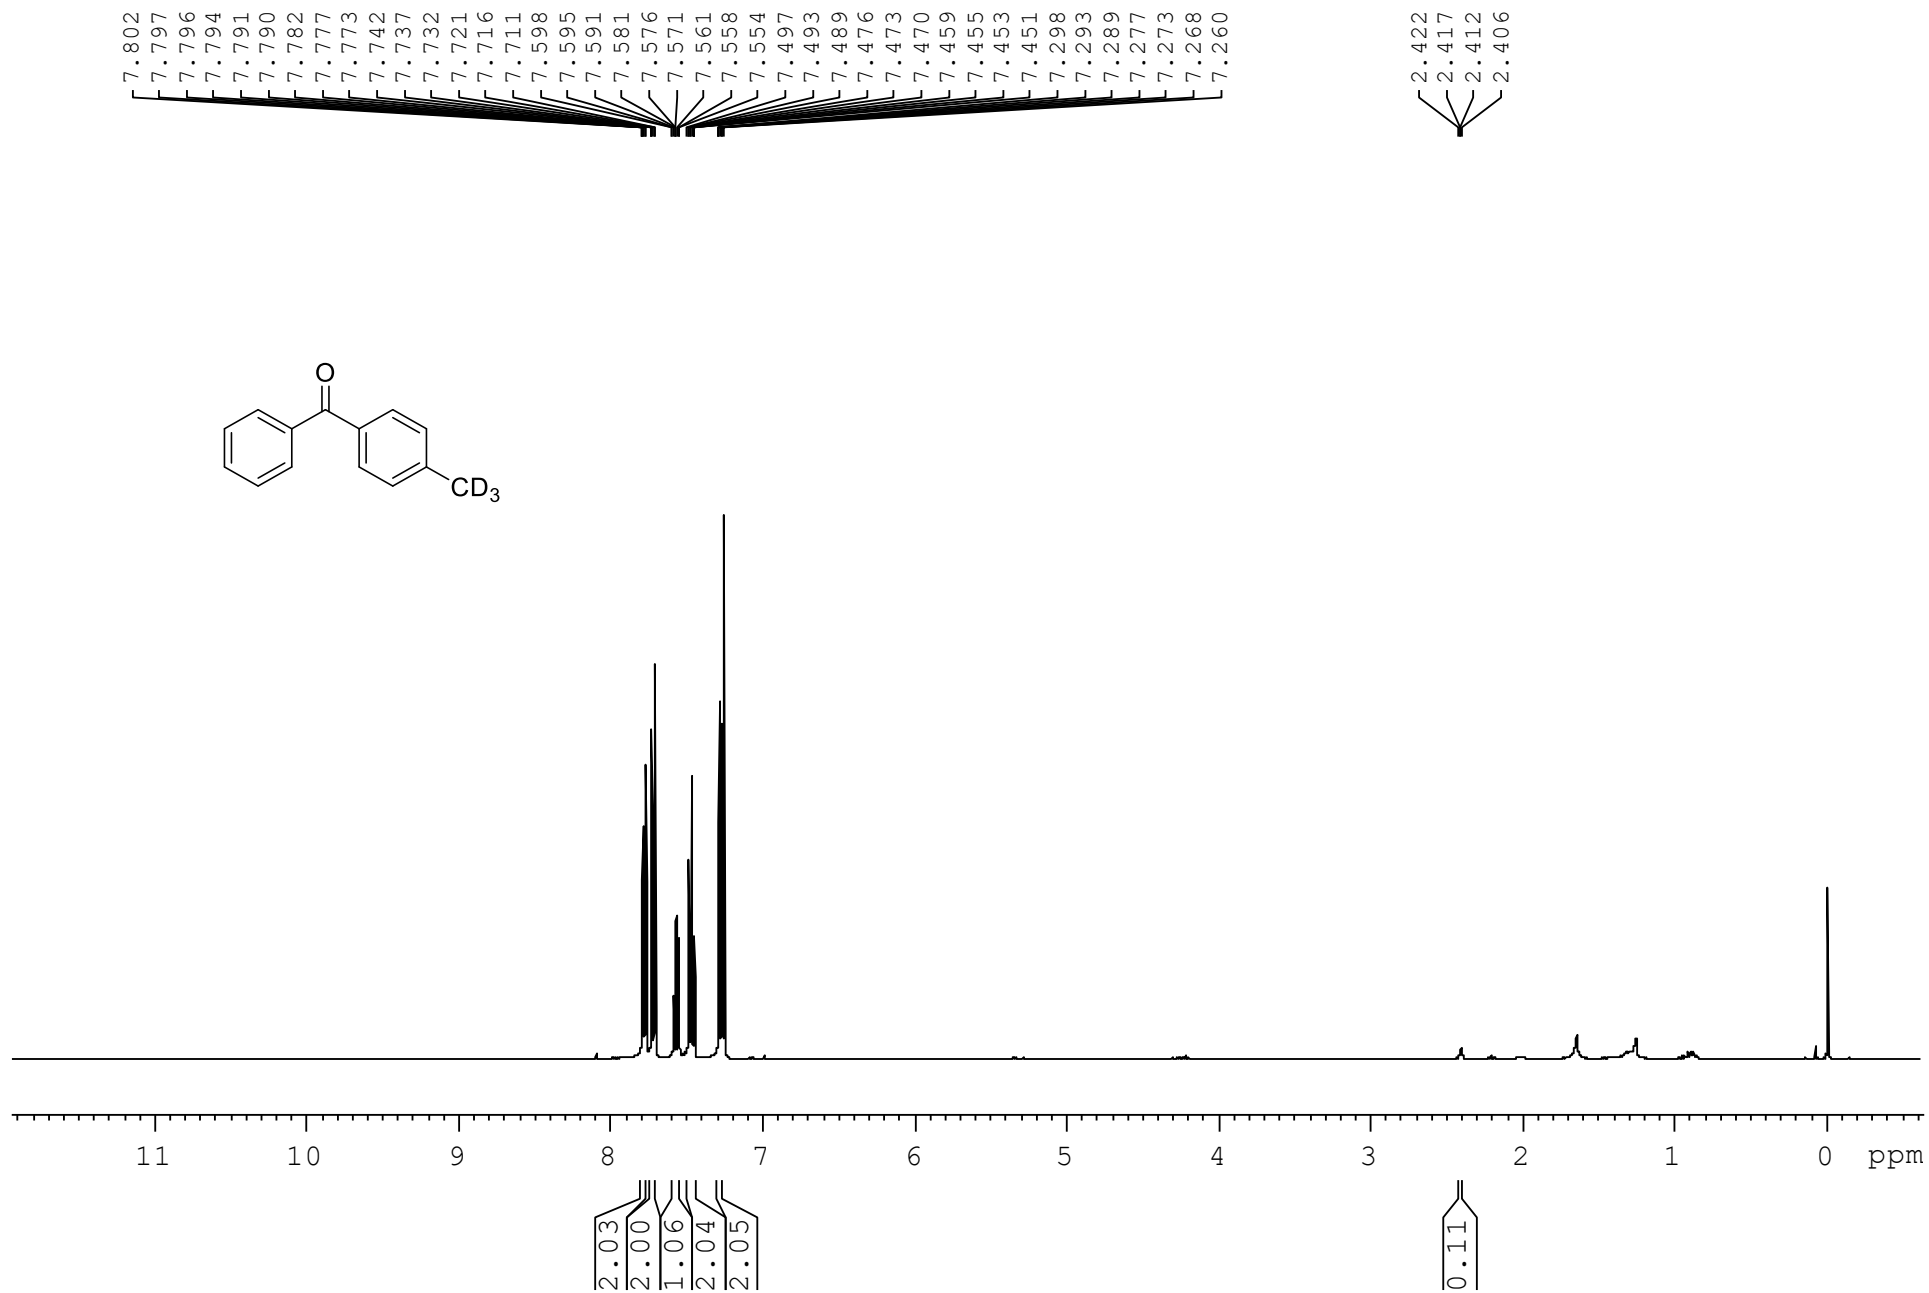

Figure S32. <sup>1</sup>H NMR spectra of **1j-d<sub>3</sub>** (CDCl<sub>3</sub>, 400 M)

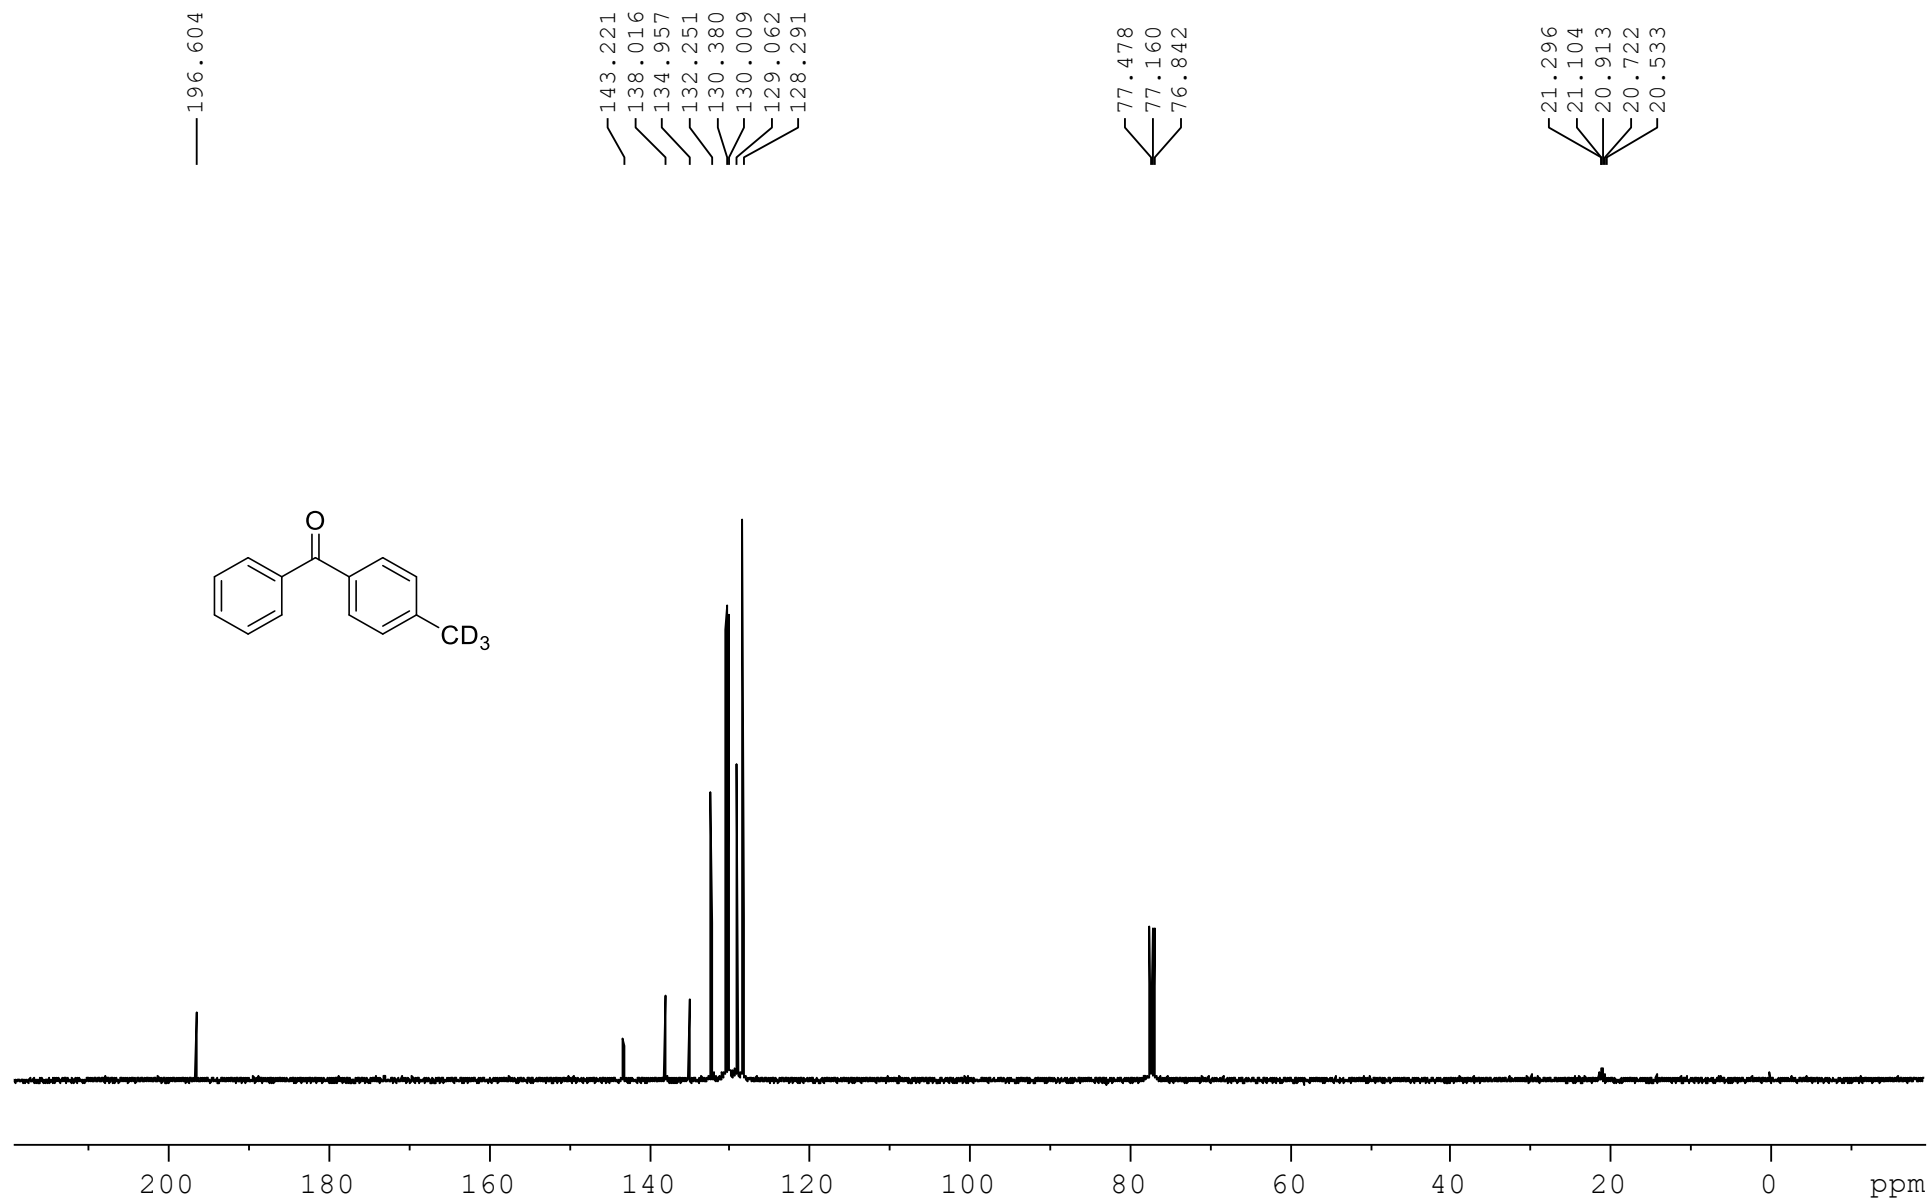

Figure S33. <sup>13</sup>C NMR spectra of **1j-d<sub>3</sub>** (CDCl<sub>3</sub>, 100 M)

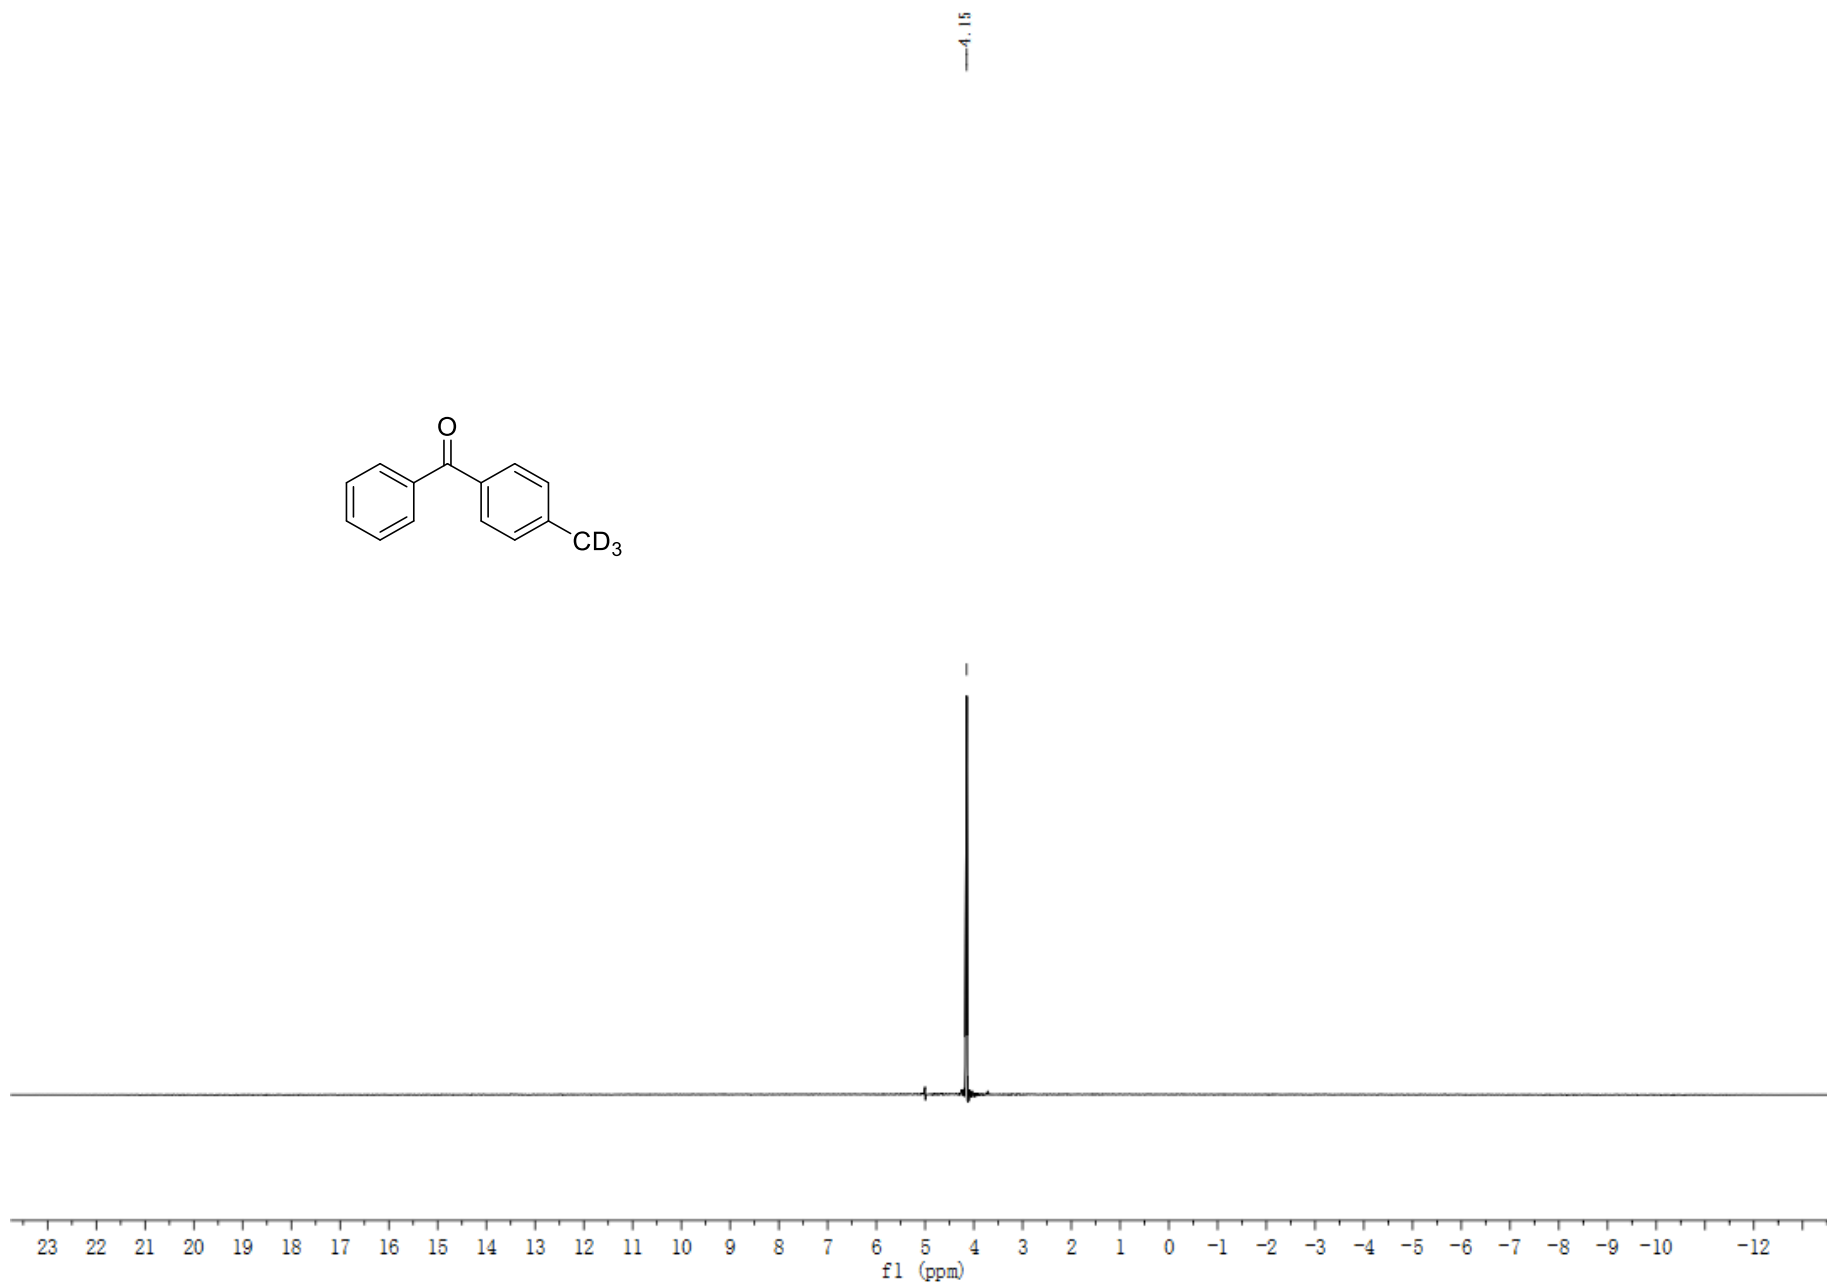

**Figure S34.**  $^2\text{H}$  NMR spectra of **1j-d<sub>3</sub>** ( $\text{MeCN}$ , 92 M)

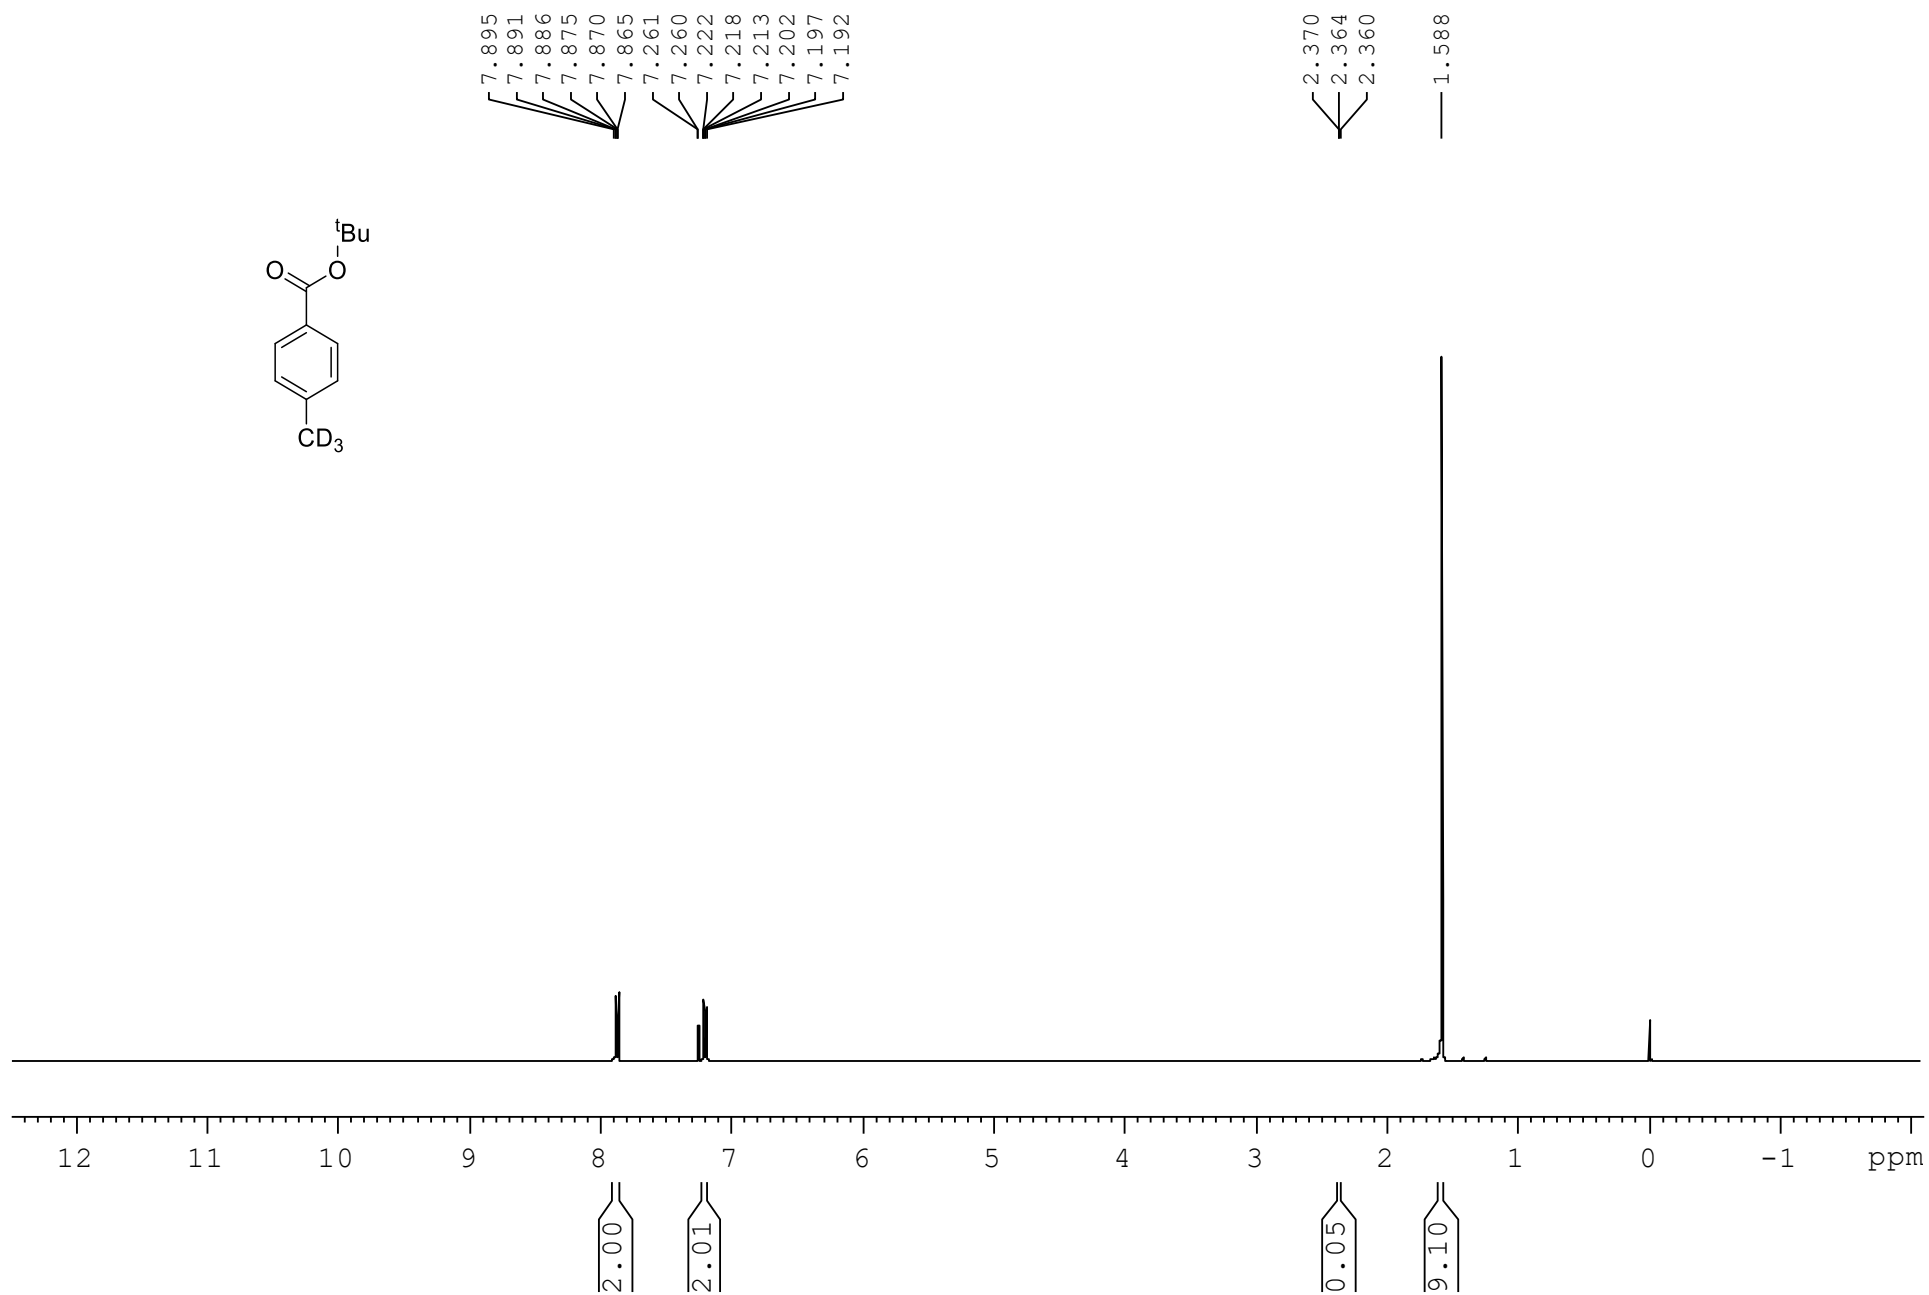

Figure S35. <sup>1</sup>H NMR spectra of **1k-d<sub>3</sub>** (CDCl<sub>3</sub>, 400 M)

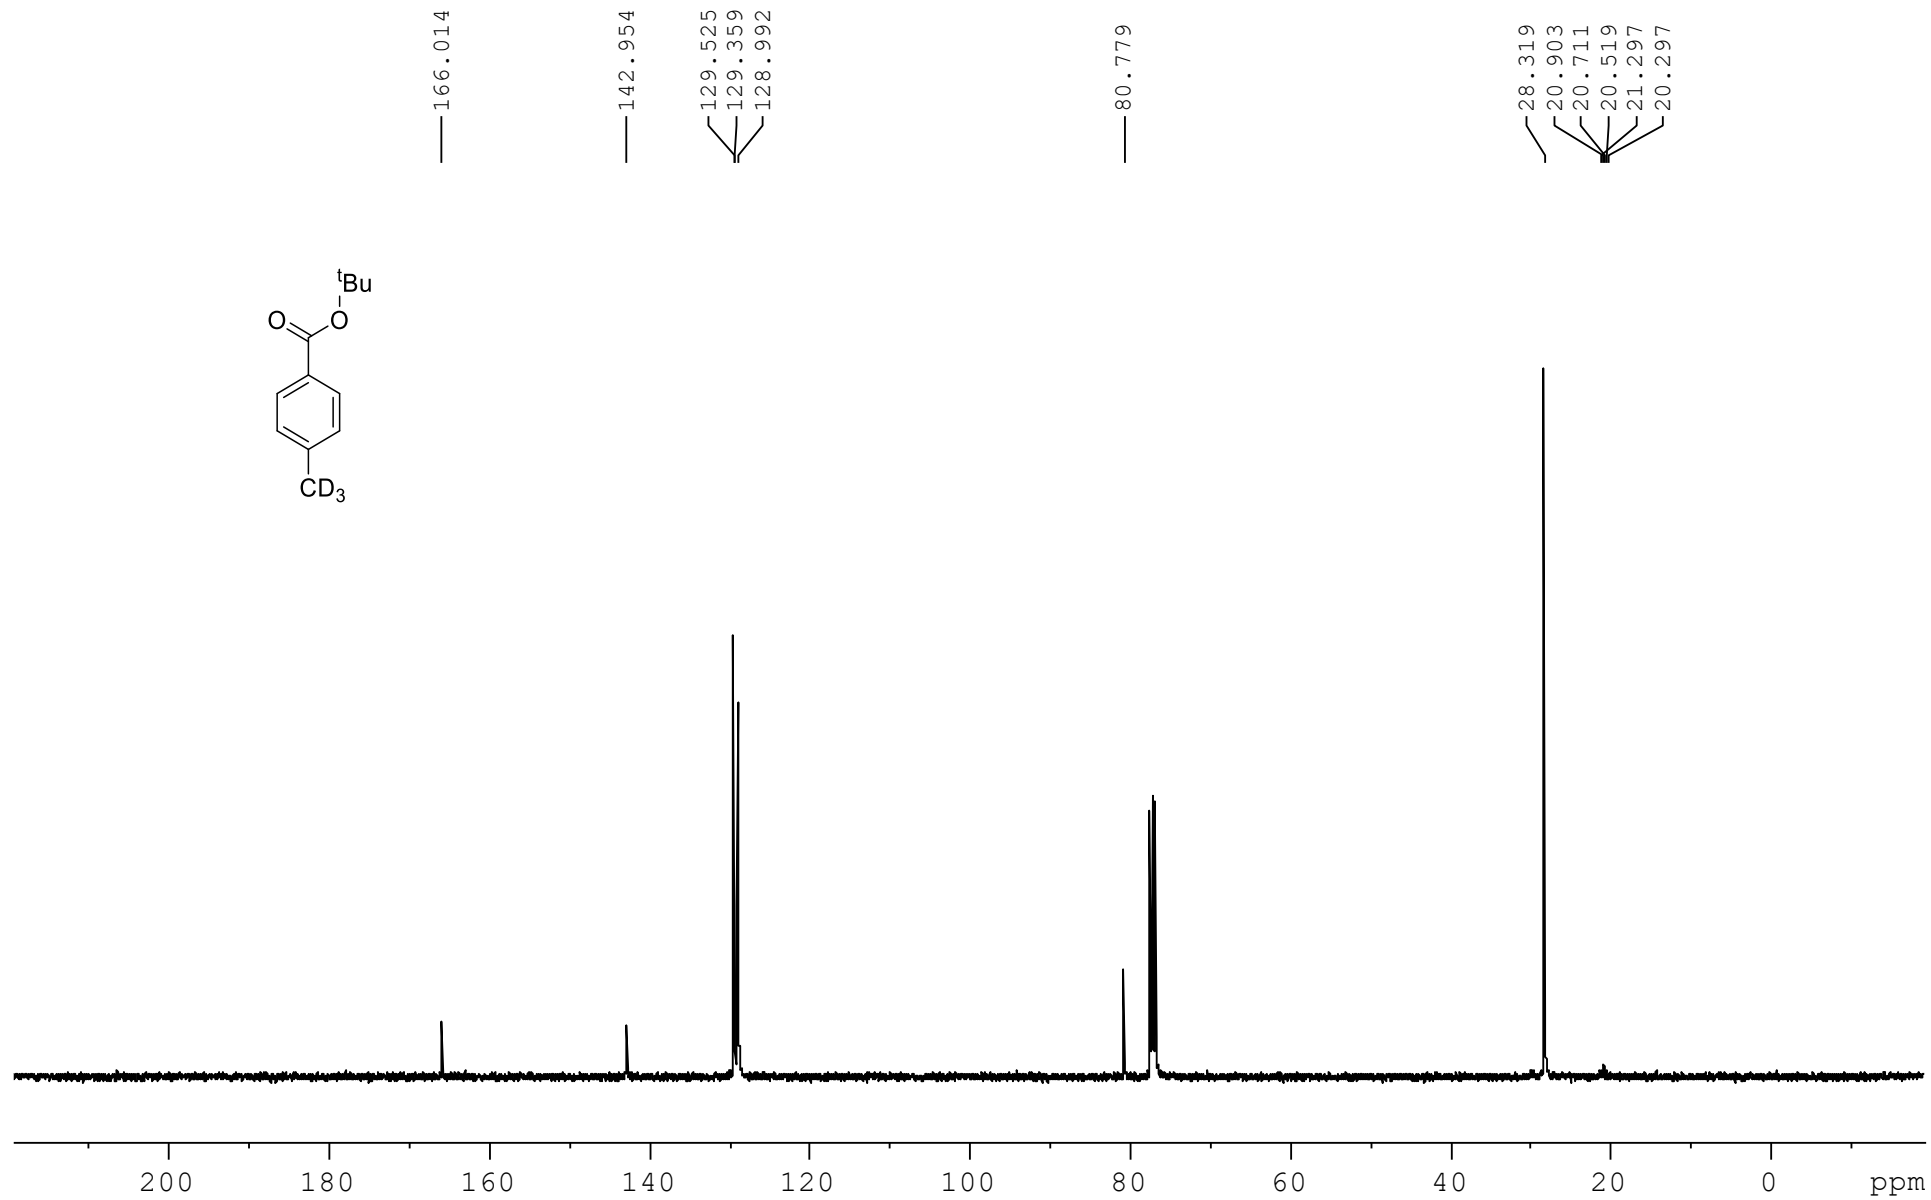

Figure S36.  $^{13}\text{C}$  NMR spectra of **1k-d<sub>3</sub>** ( $\text{CDCl}_3$ , 100 M)

4.11

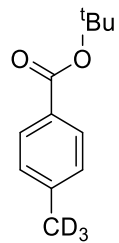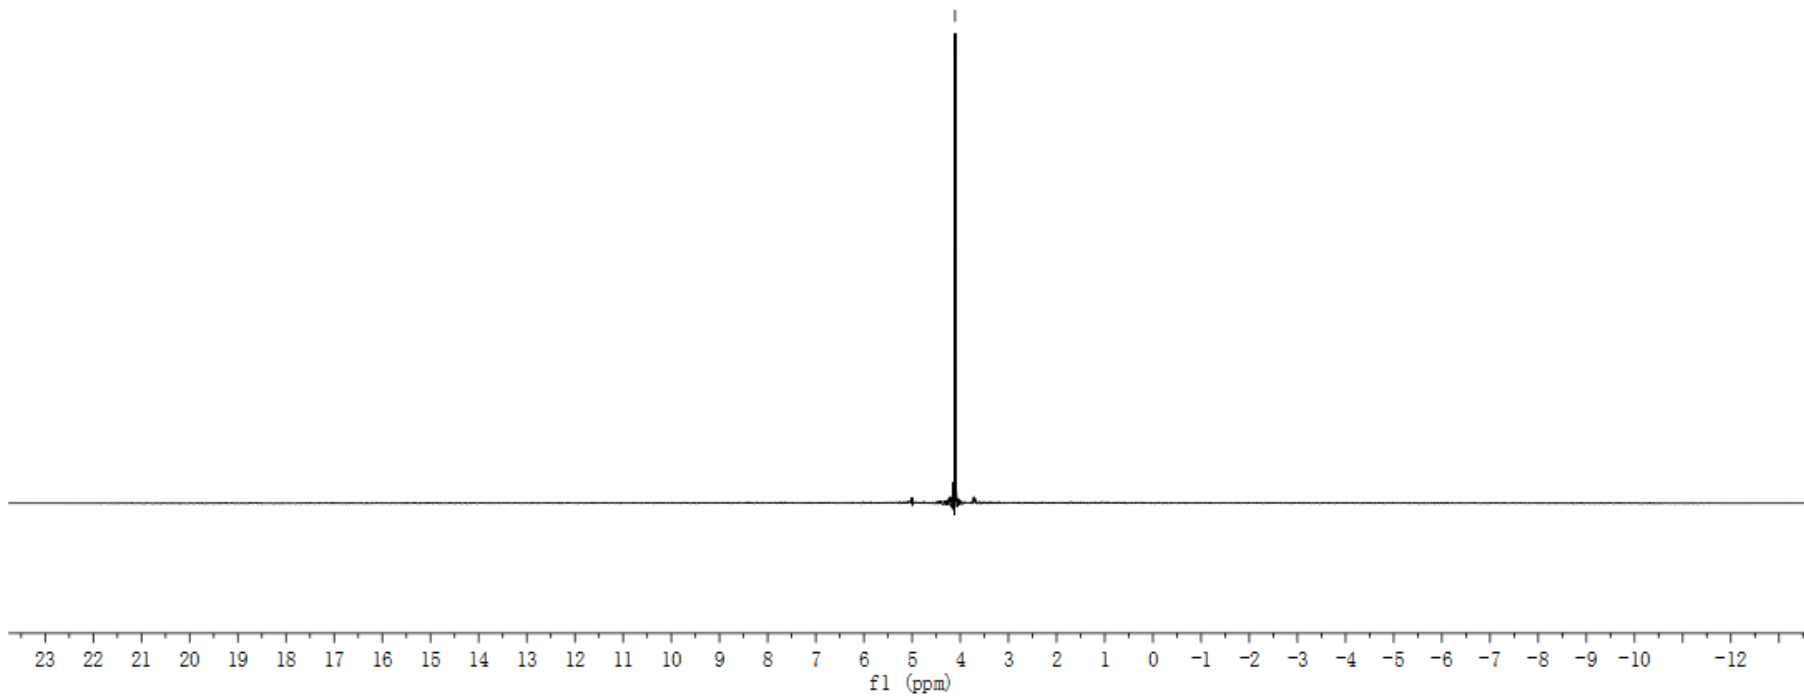

Figure S37. <sup>2</sup>H NMR spectra of 1k-d<sub>3</sub> (MeCN, 92 M)



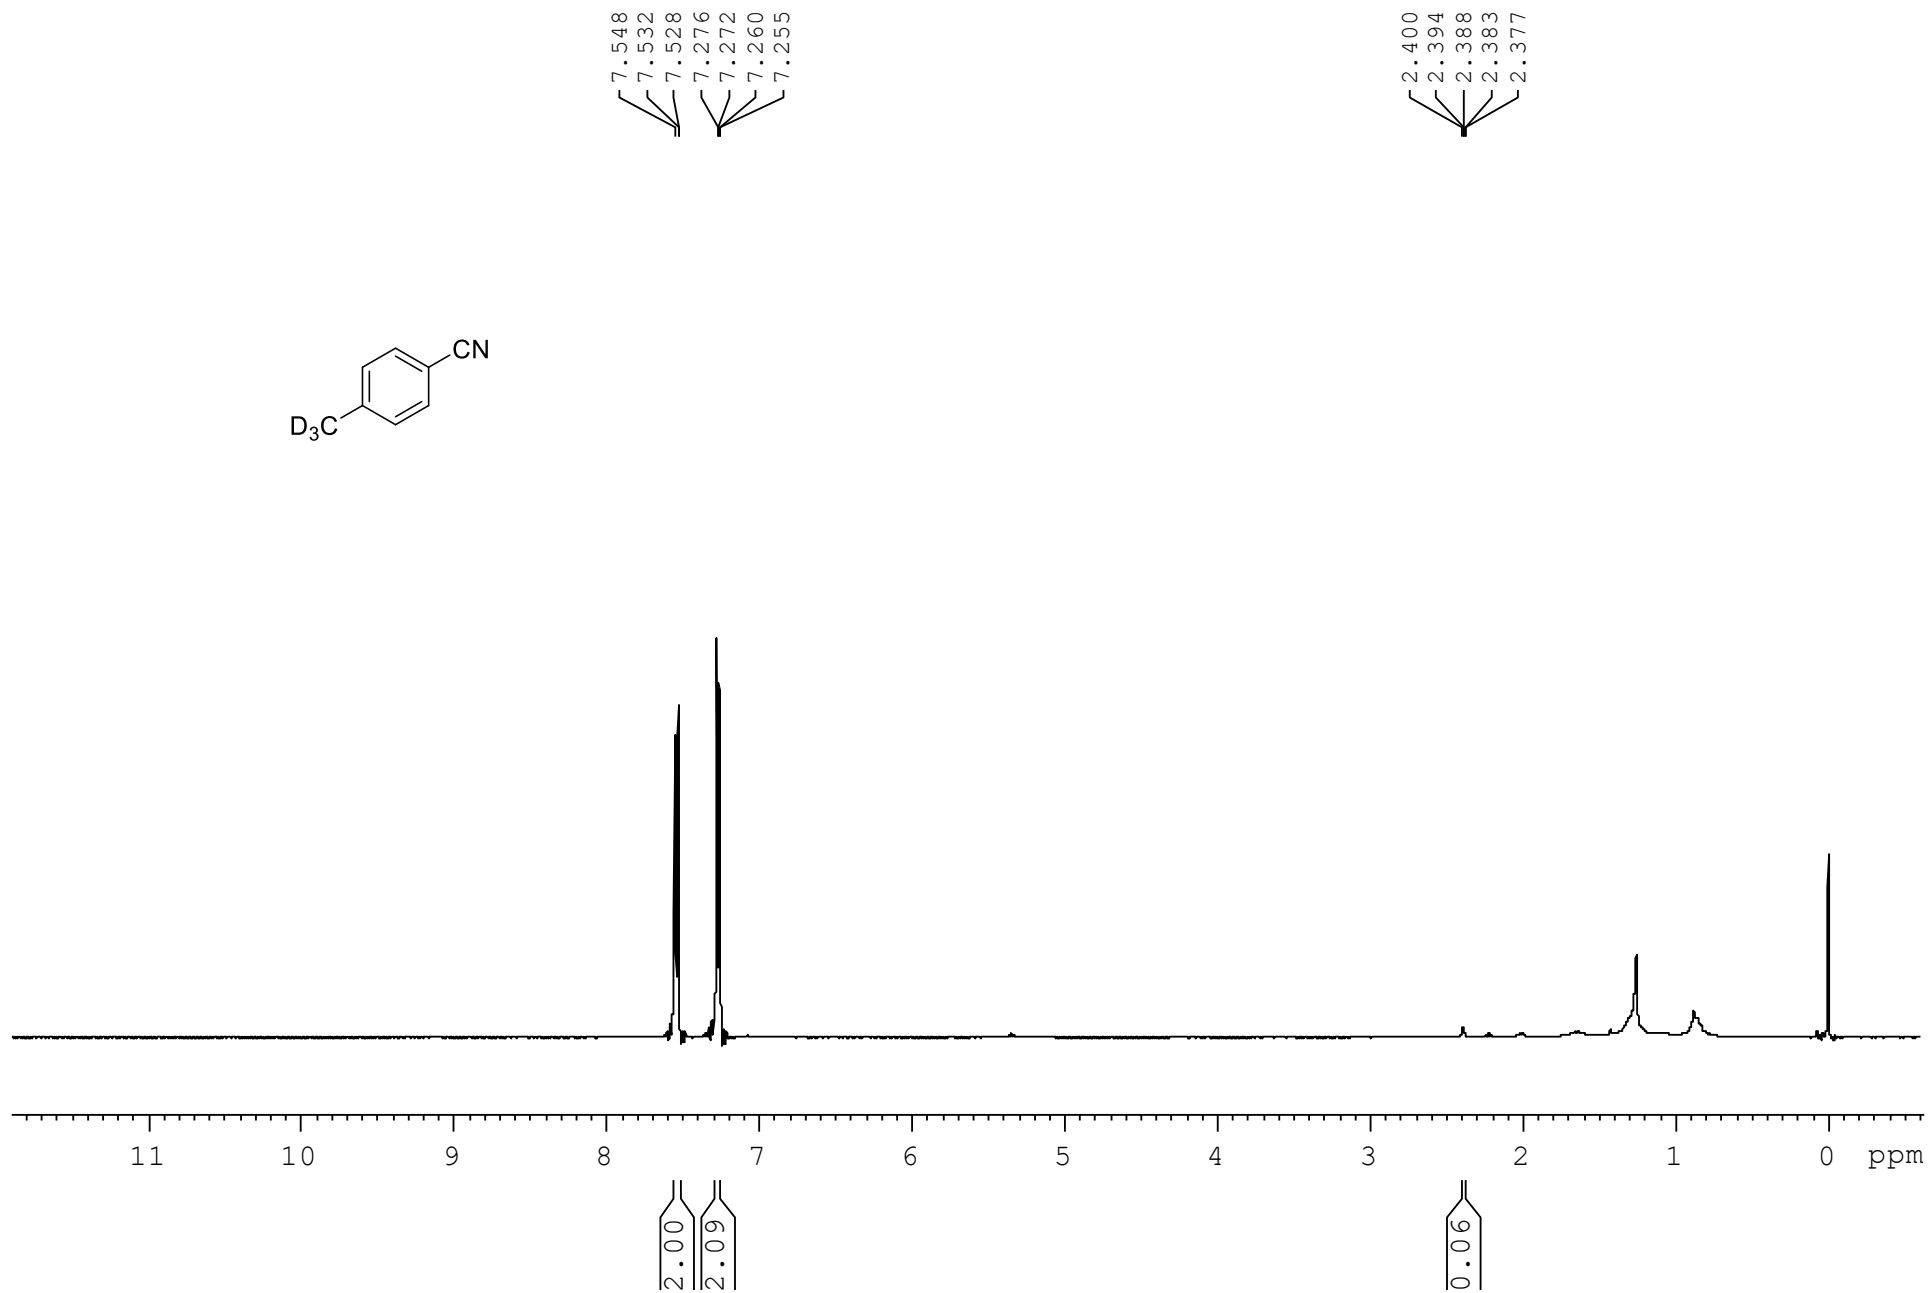

Figure S38. <sup>1</sup>H NMR spectra of 11-*d*<sub>3</sub> (CDCl<sub>3</sub>, 400 M)

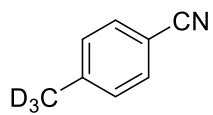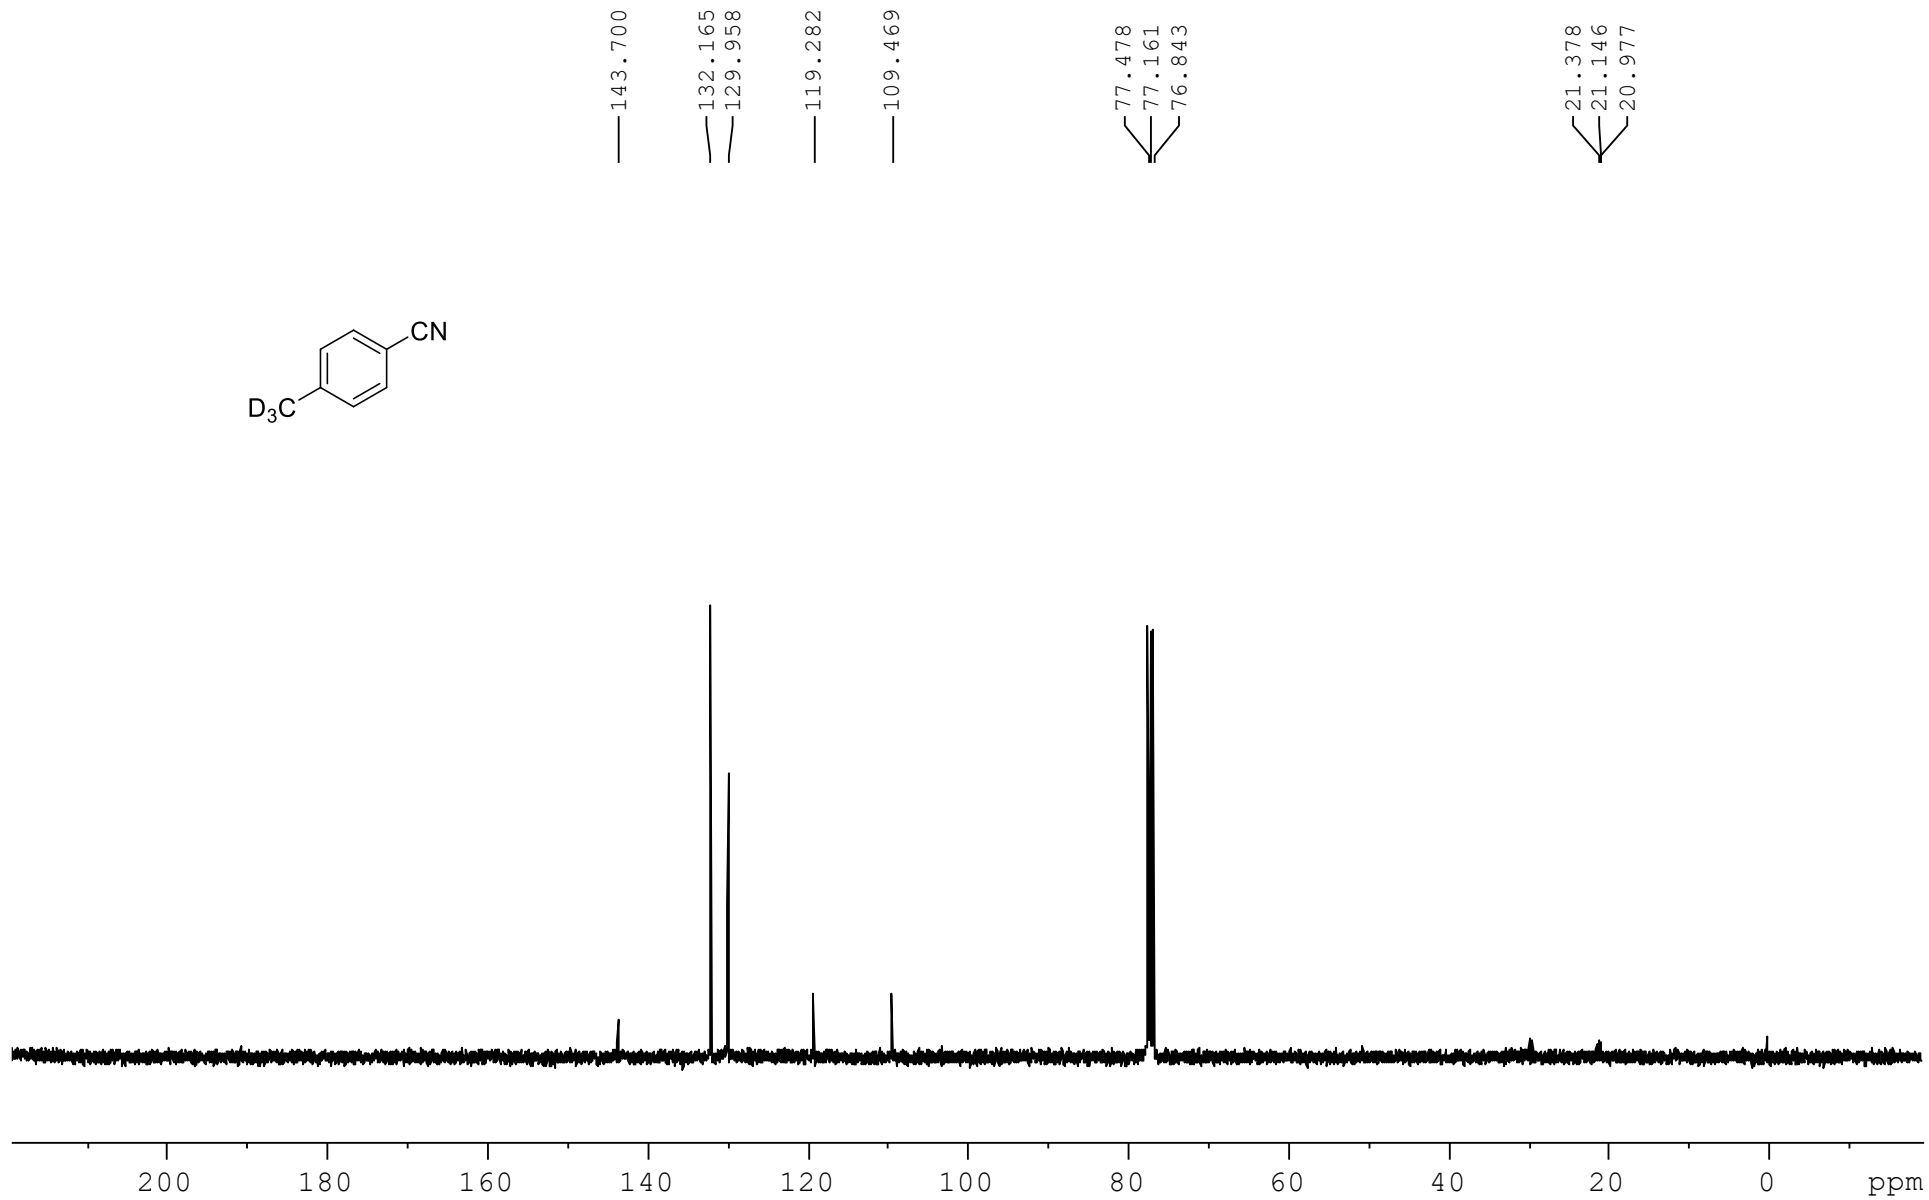

Figure S39. <sup>13</sup>C NMR spectra of 11-d<sub>3</sub> (CDCl<sub>3</sub>, 100 M)

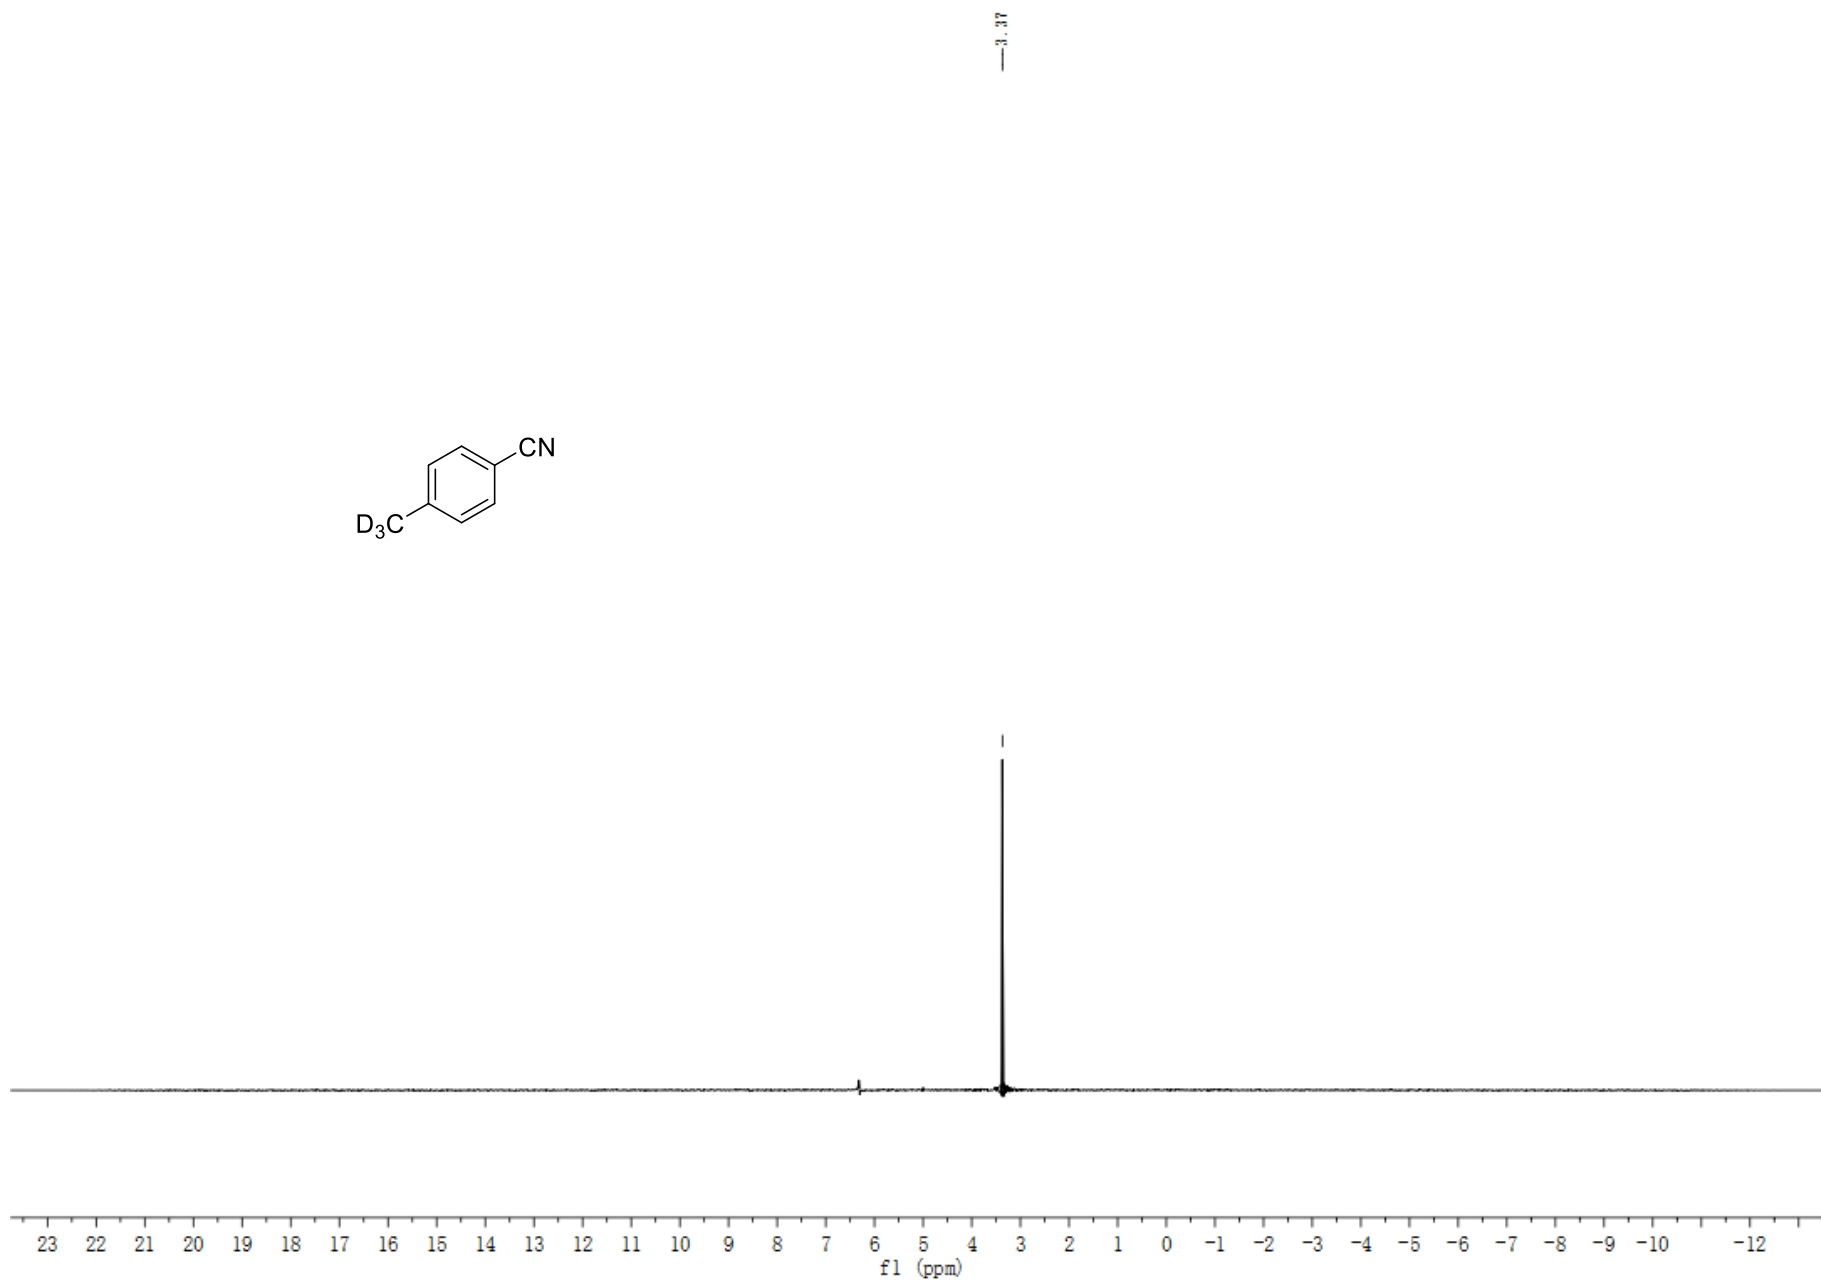

**Figure S40.**  $^2\text{H}$  NMR spectra of  $11-d_3$  (MeCN, 92 M)

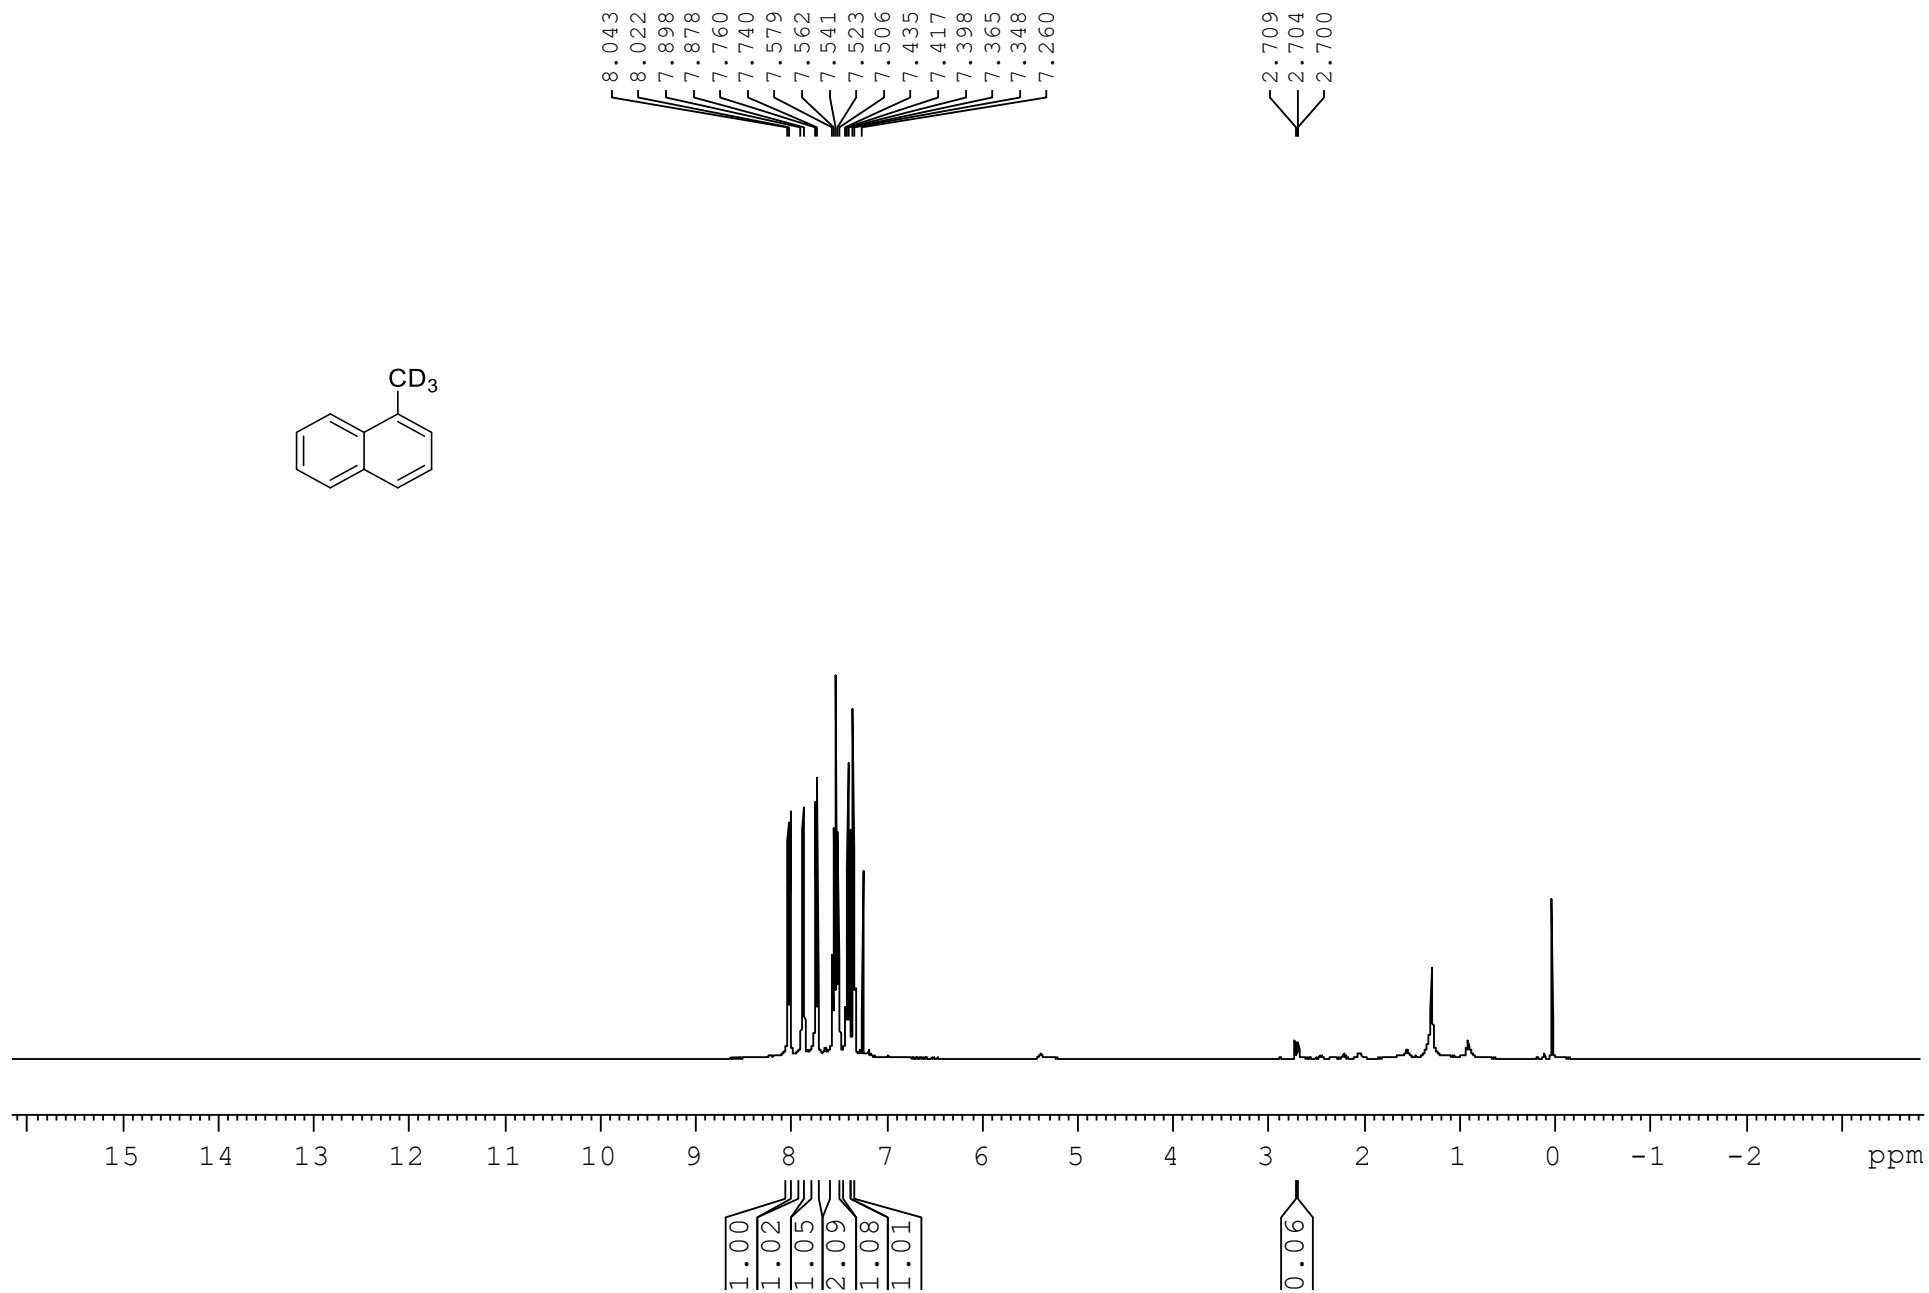

Figure S41. <sup>1</sup>H NMR spectra of *1m-d<sub>3</sub>* (CDCl<sub>3</sub>, 400 M)

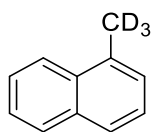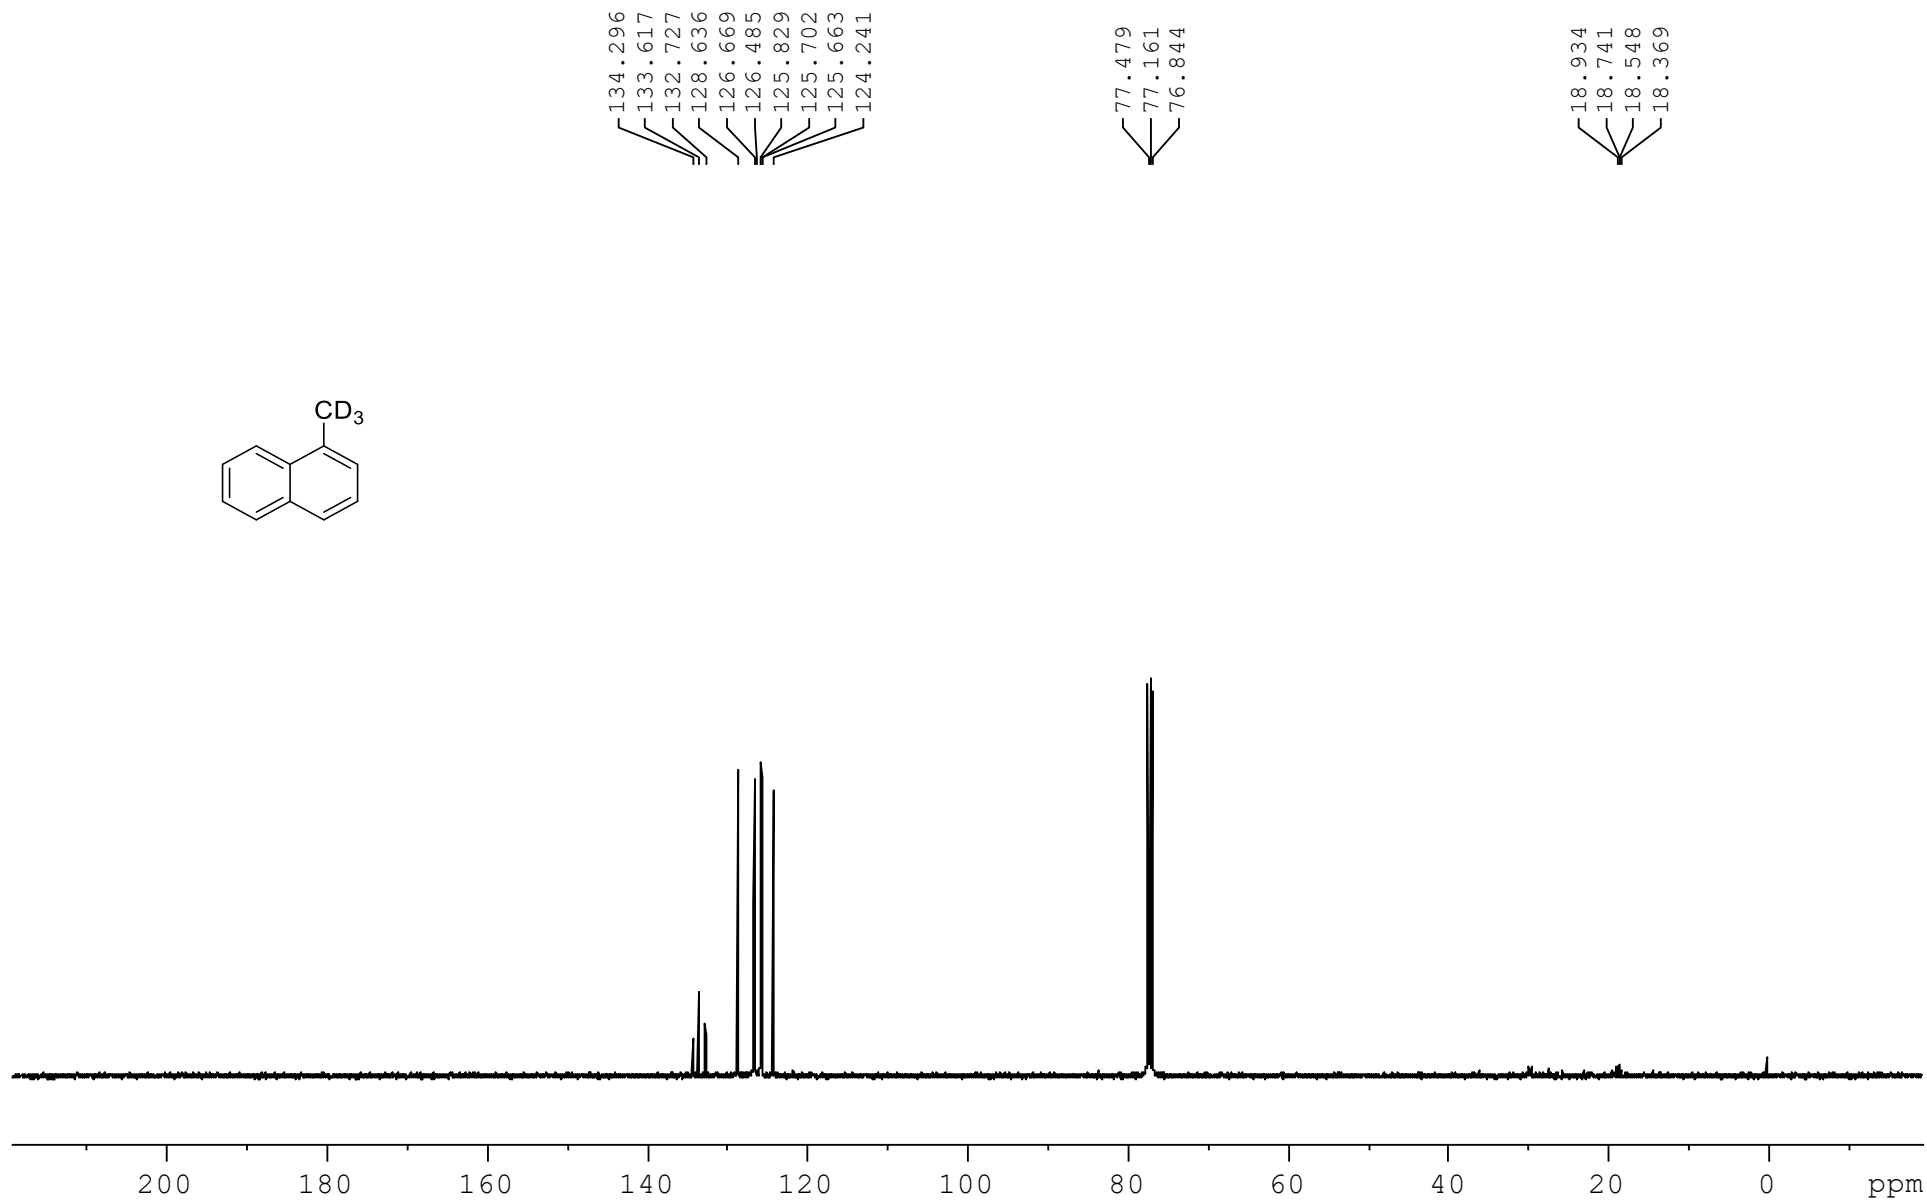

Figure S42. <sup>13</sup>C NMR spectra of **1m-d<sub>3</sub>** (CDCl<sub>3</sub>, 100 M)

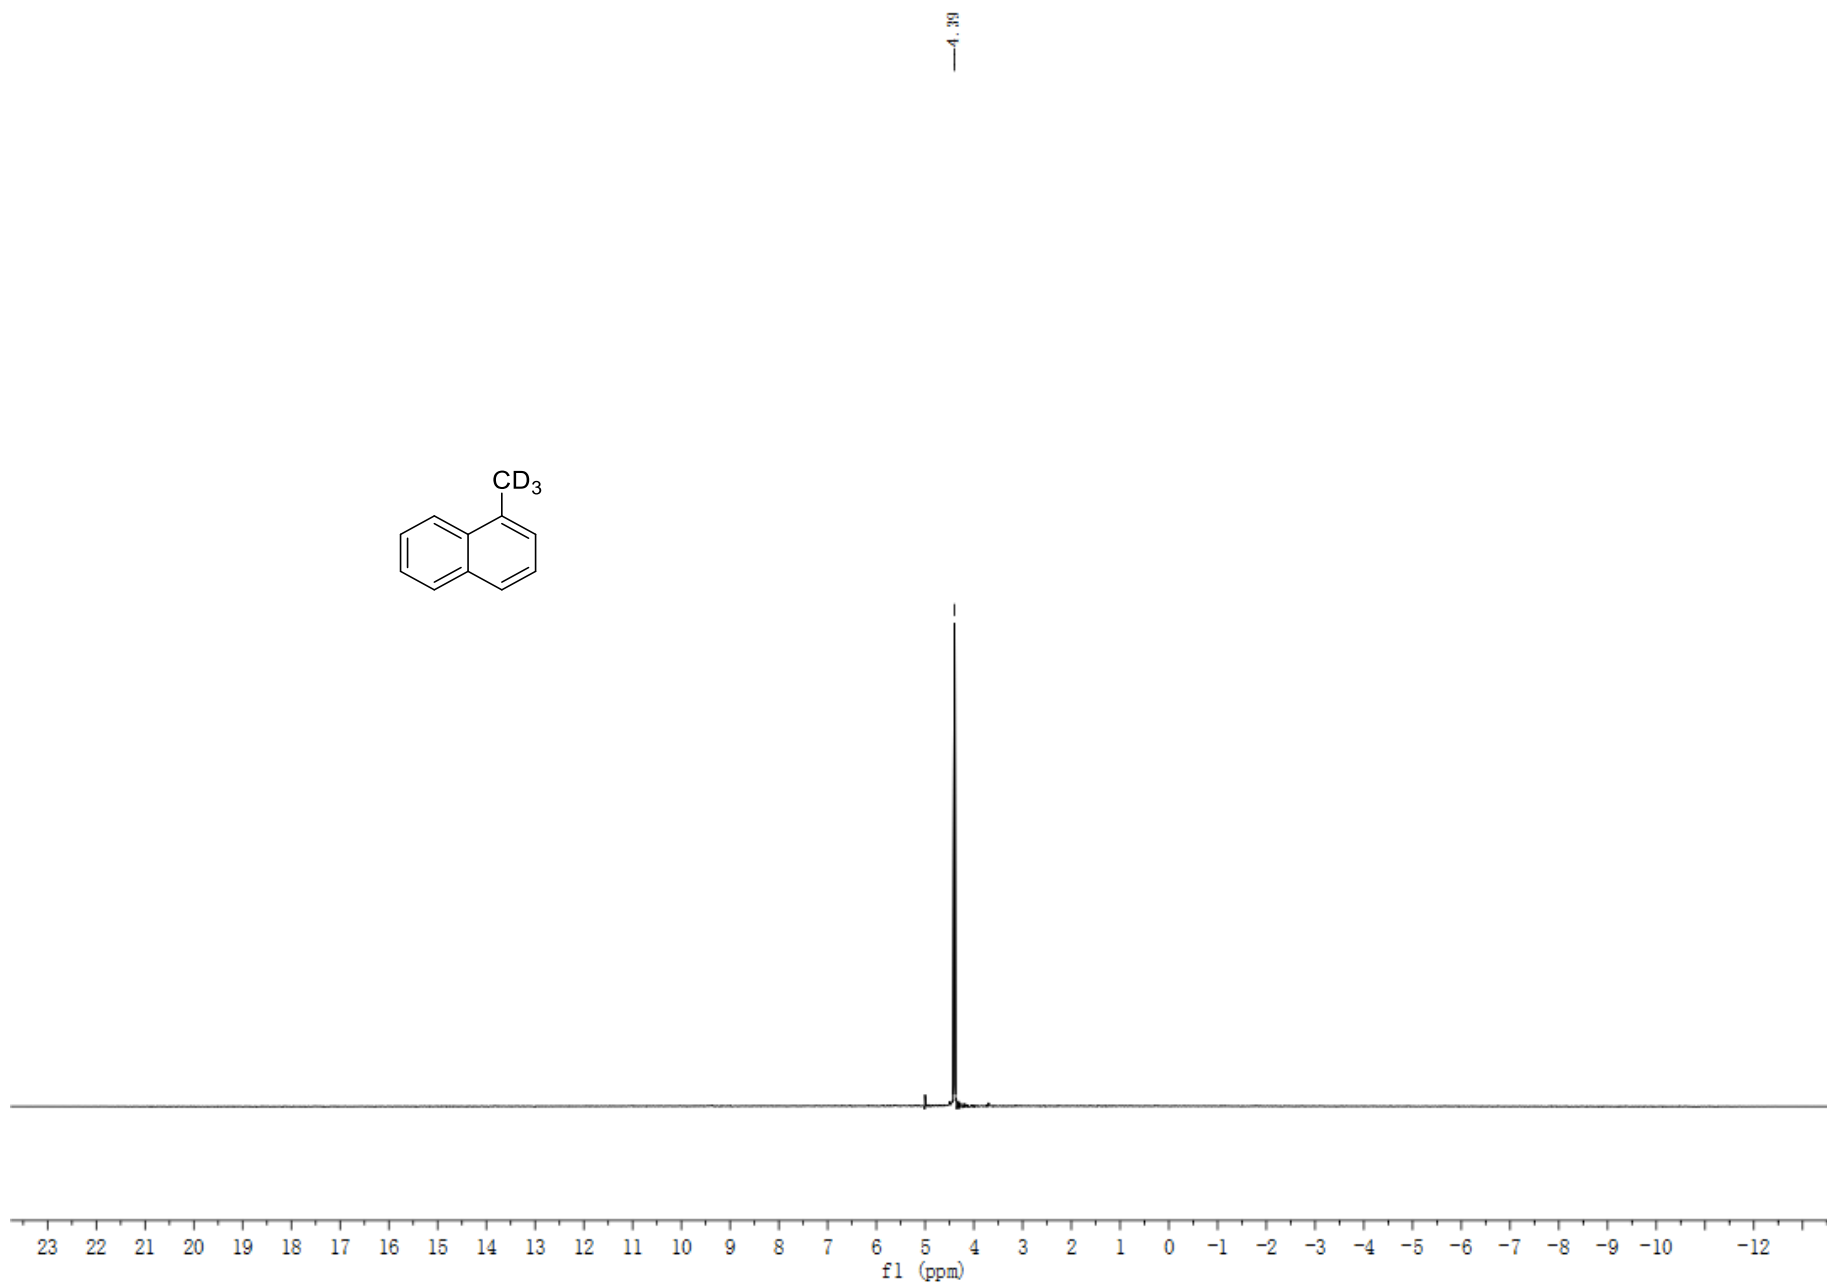

**Figure S43.**  $^2\text{H}$  NMR spectra of  $1\text{m-}d_3$  ( $\text{MeCN}$ , 92 M)

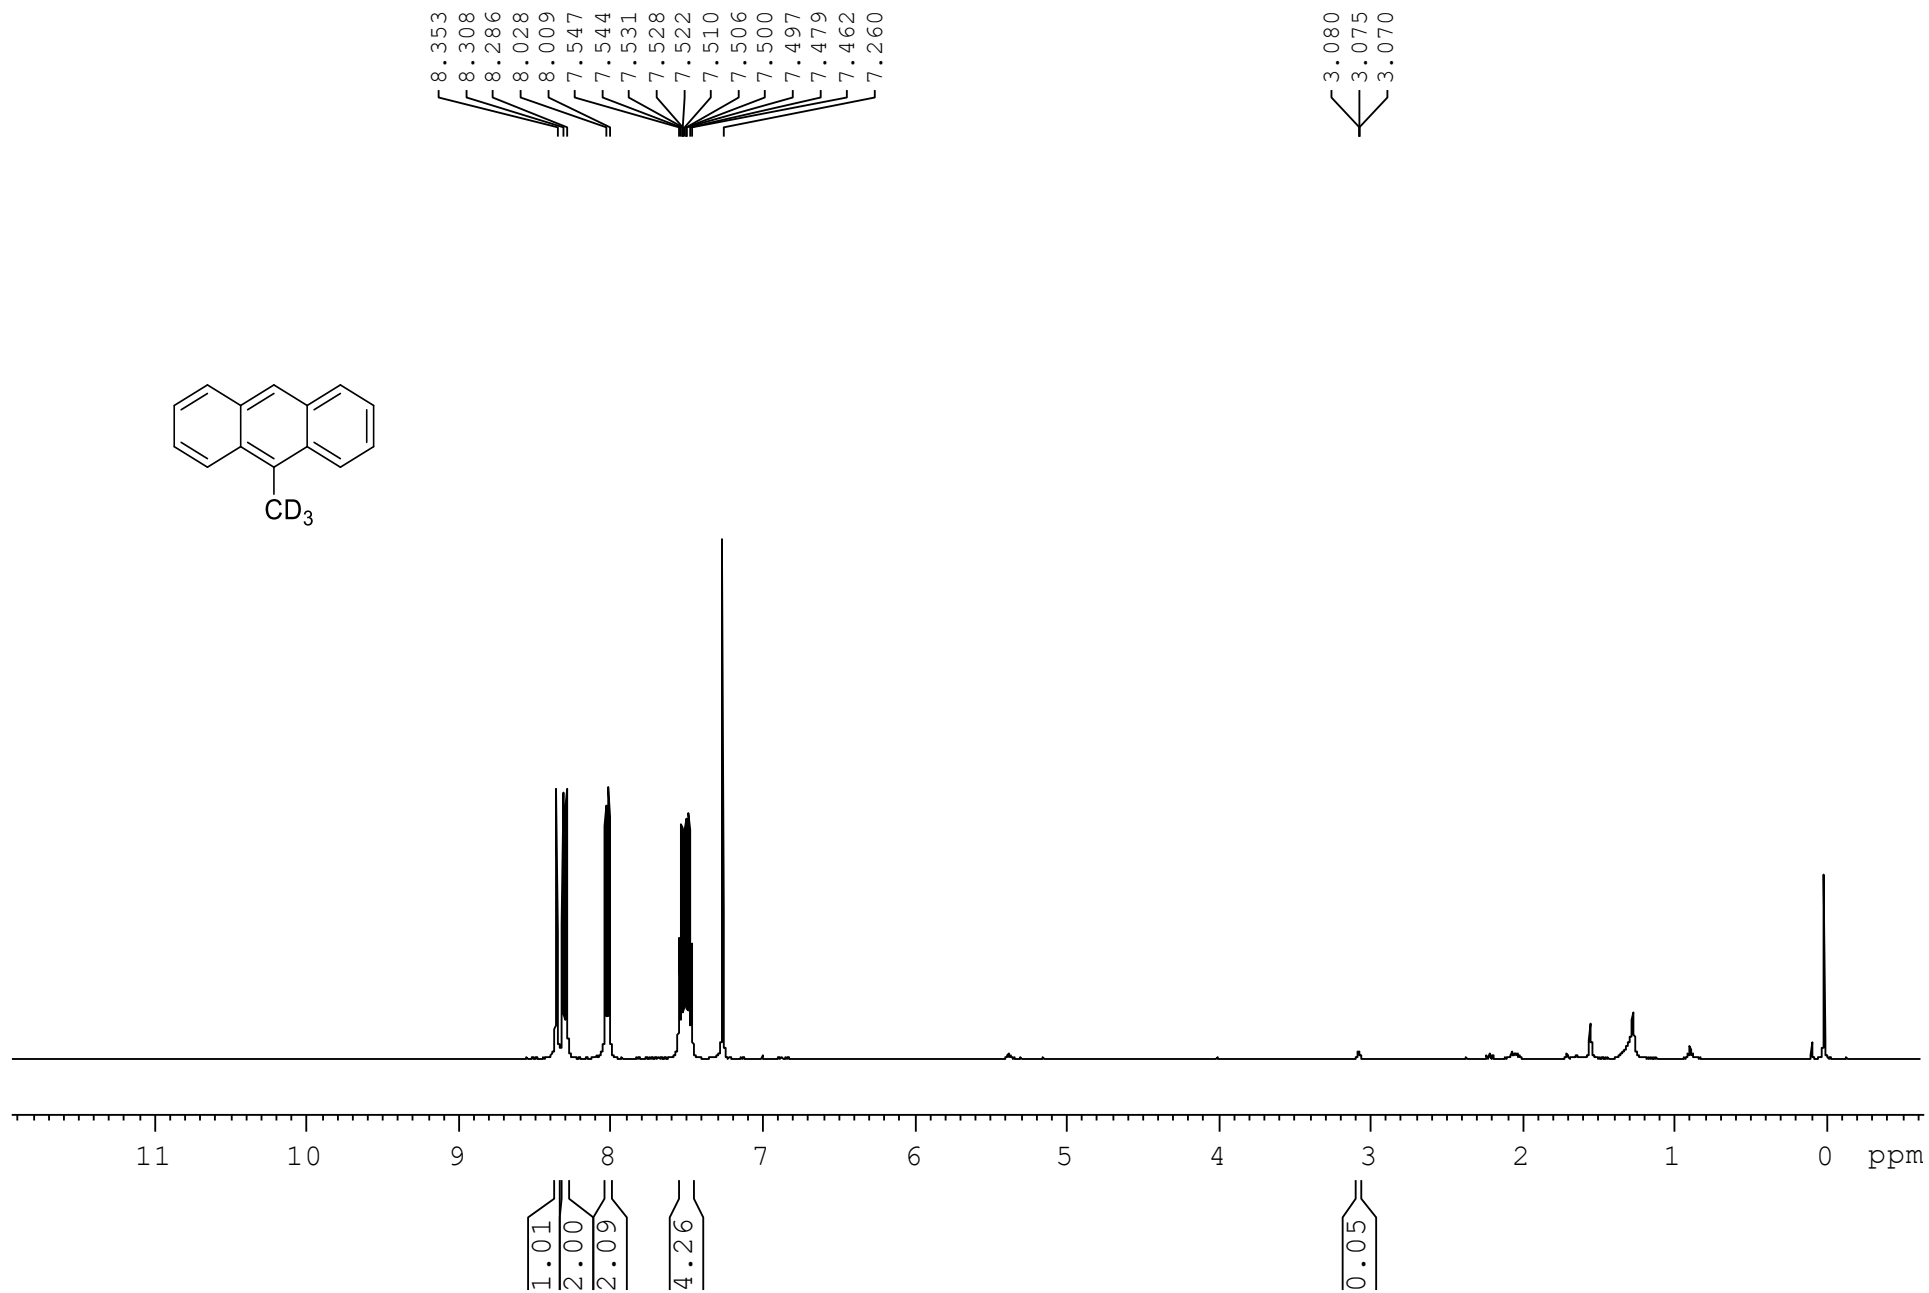

Figure S44. <sup>1</sup>H NMR spectra of 1n-d<sub>3</sub> (CDCl<sub>3</sub>, 400 M)

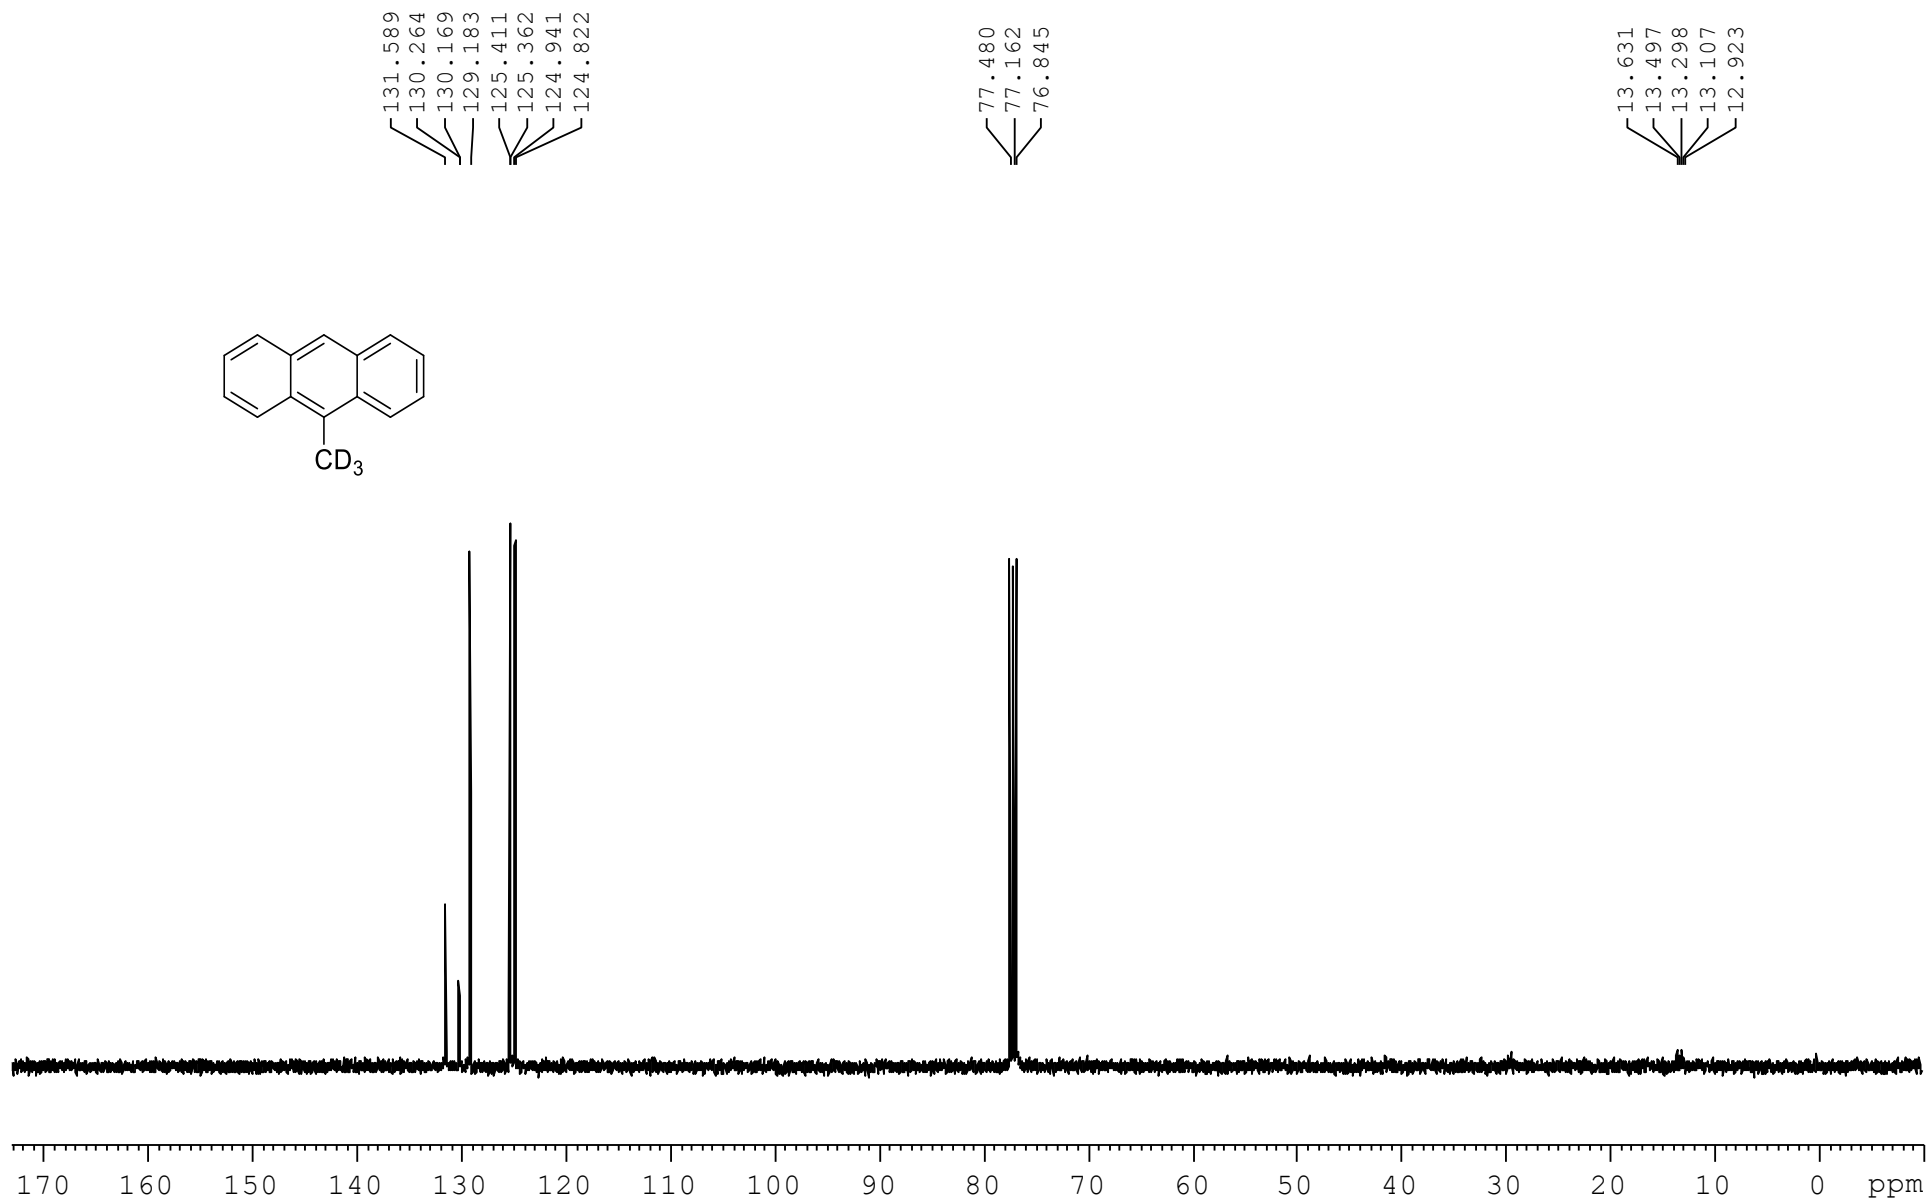

Figure S45. <sup>13</sup>C NMR spectra of **1n-d<sub>3</sub>** (CDCl<sub>3</sub>, 100 M)



4.80

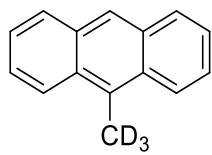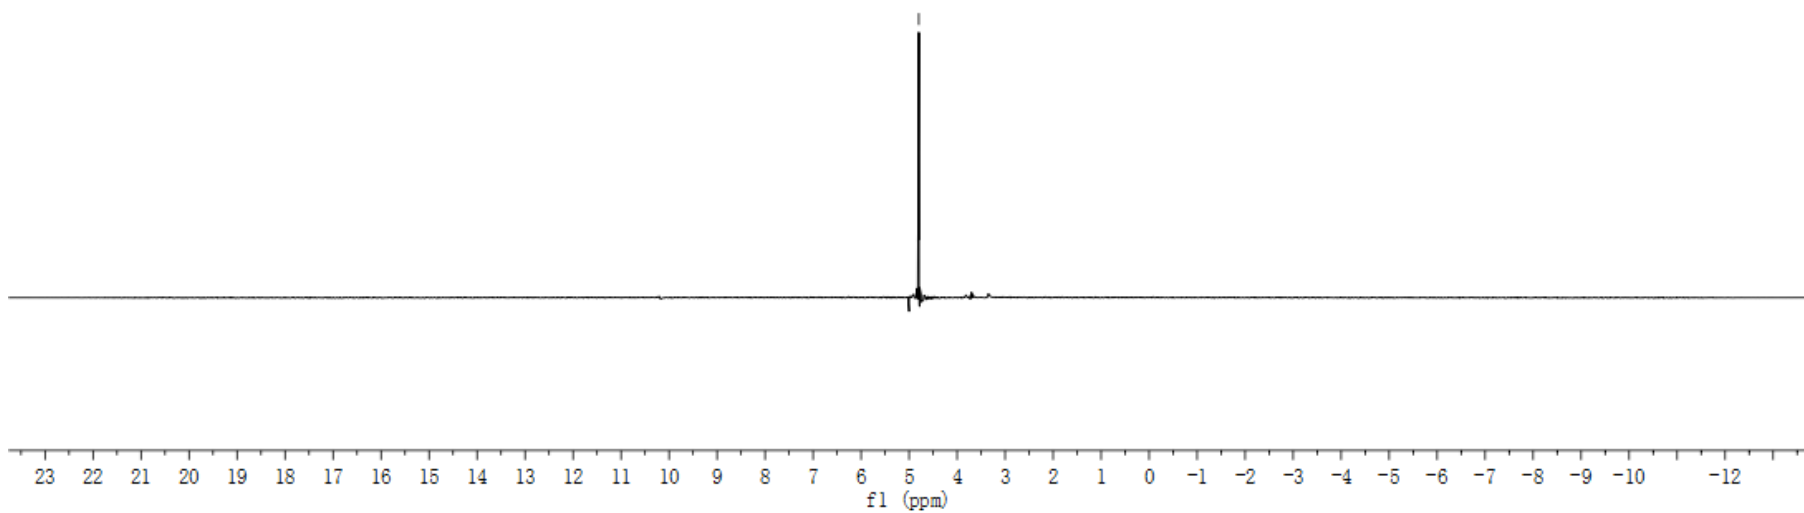

Figure S46. <sup>2</sup>H NMR spectra of **1n-d<sub>3</sub>** (MeCN, 92 M)

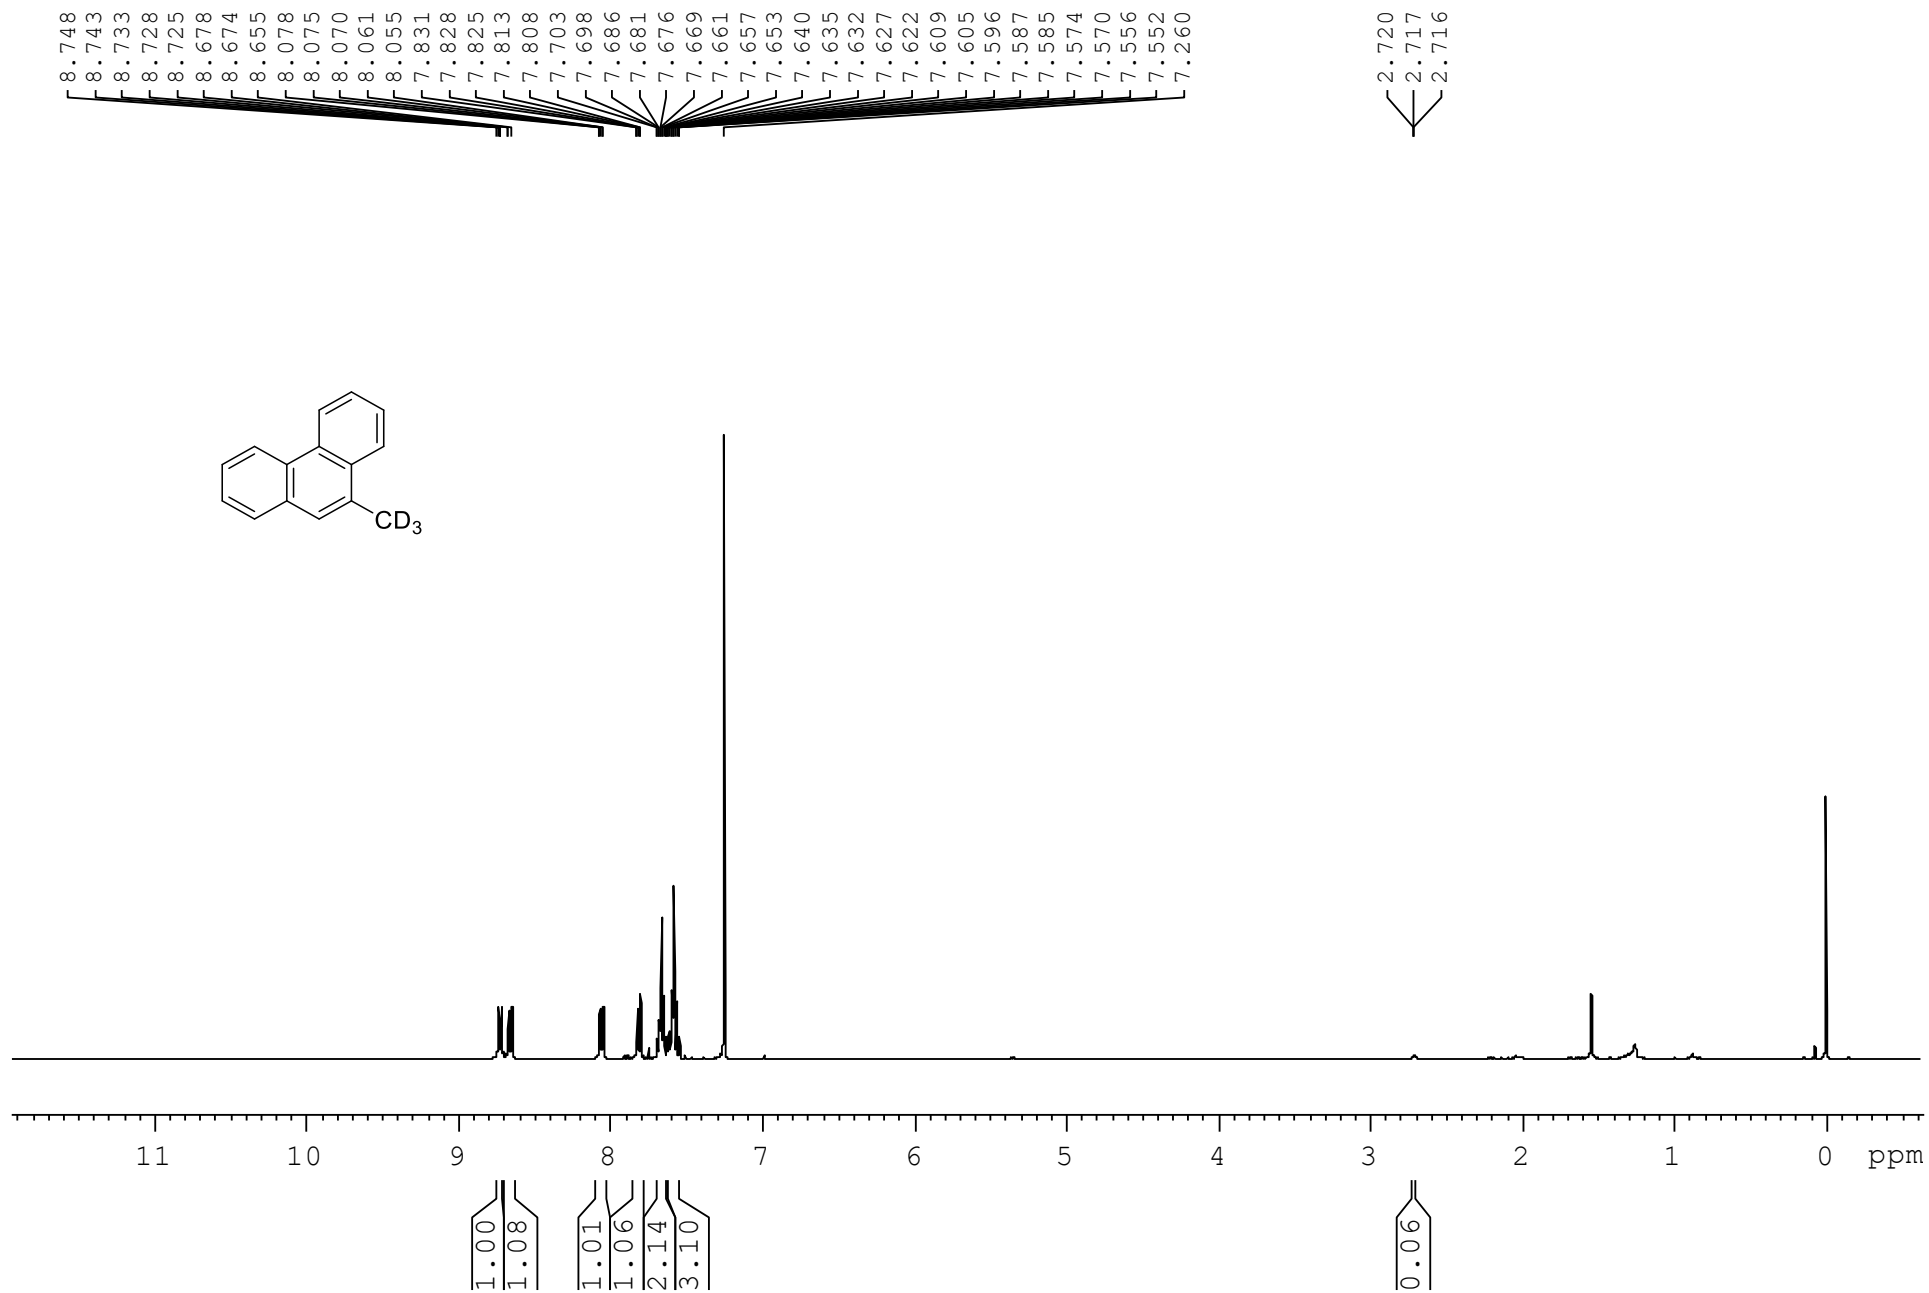

Figure S47. <sup>1</sup>H NMR spectra of 10-d<sub>3</sub> (CDCl<sub>3</sub>, 400 M)

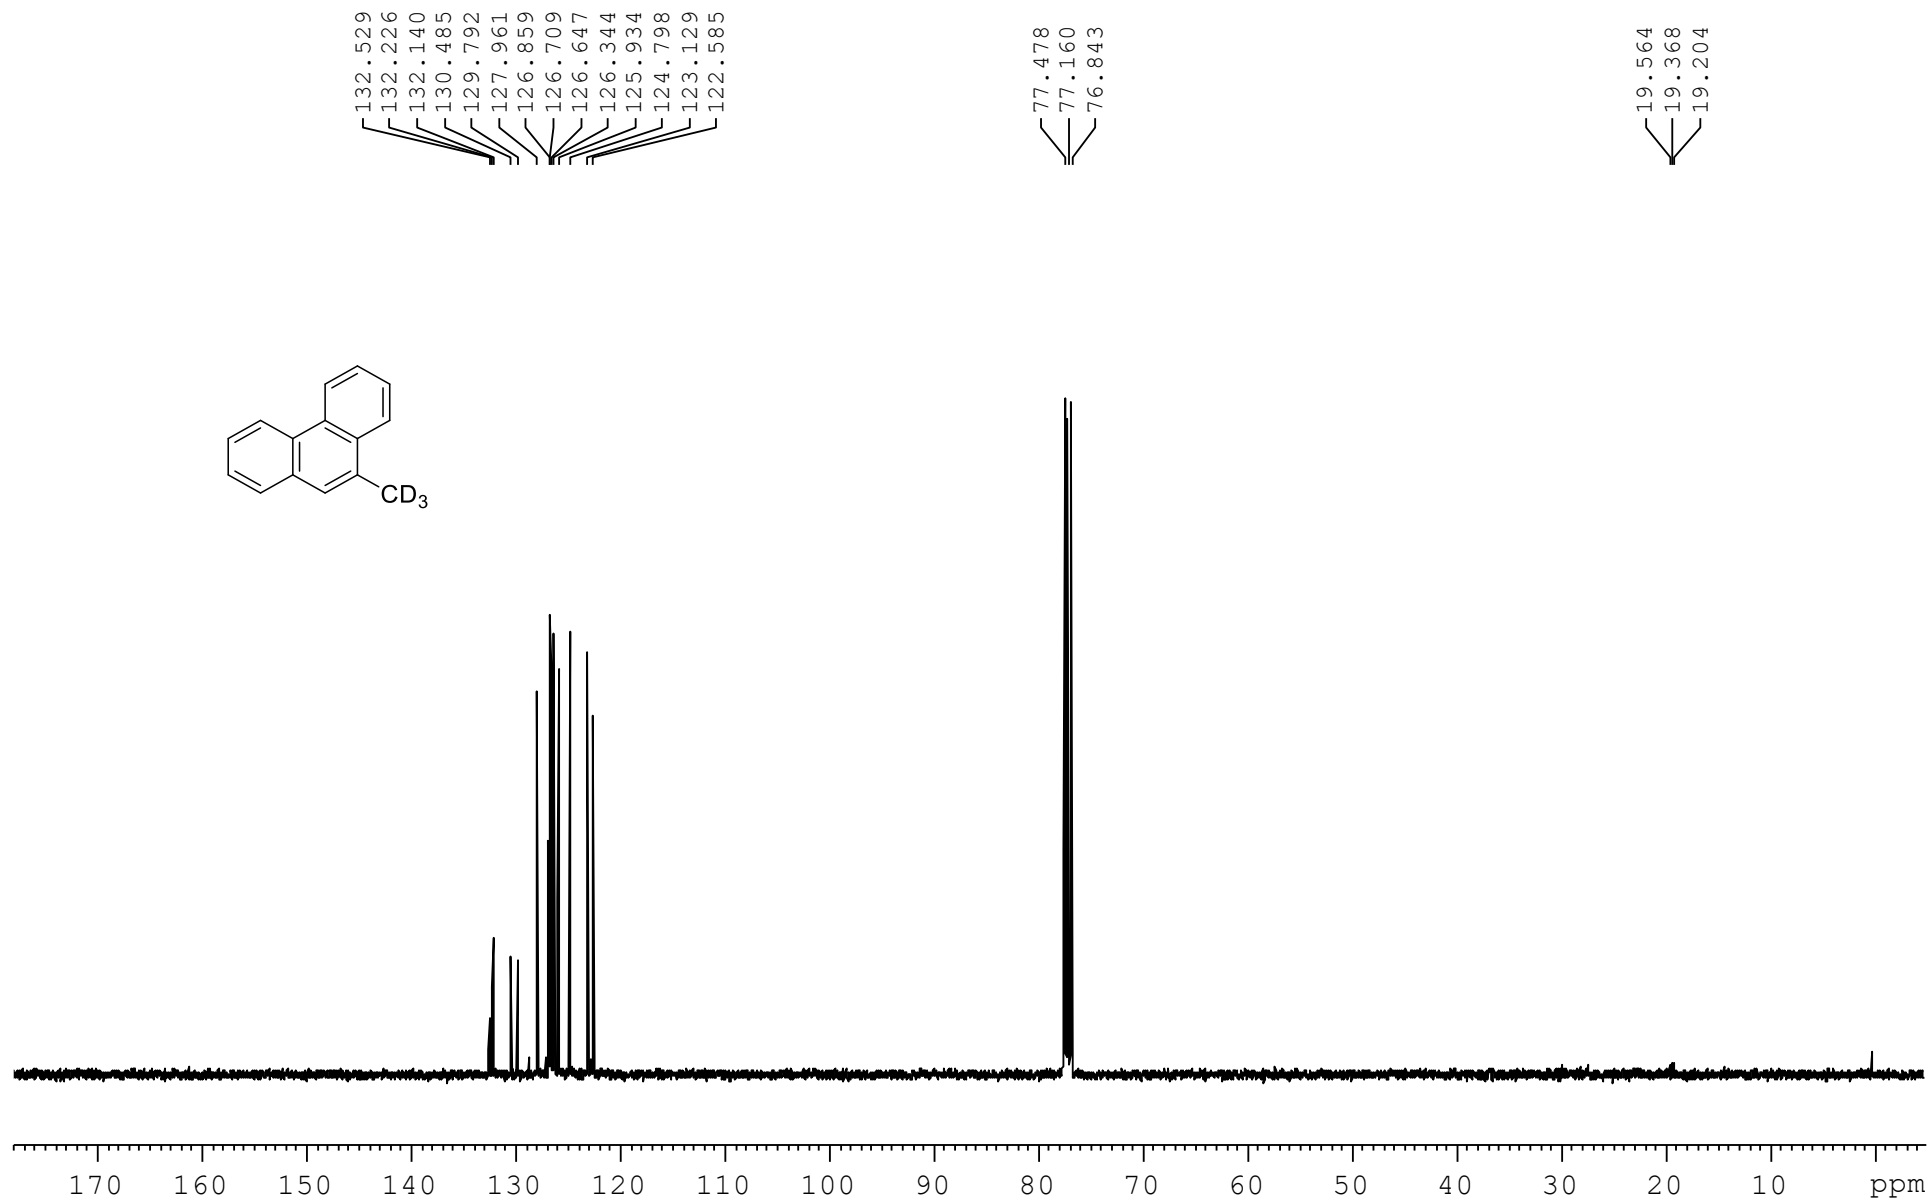

Figure S48. <sup>13</sup>C NMR spectra of **10-d<sub>3</sub>** (CDCl<sub>3</sub>, 100 M)

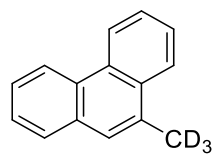

3.65

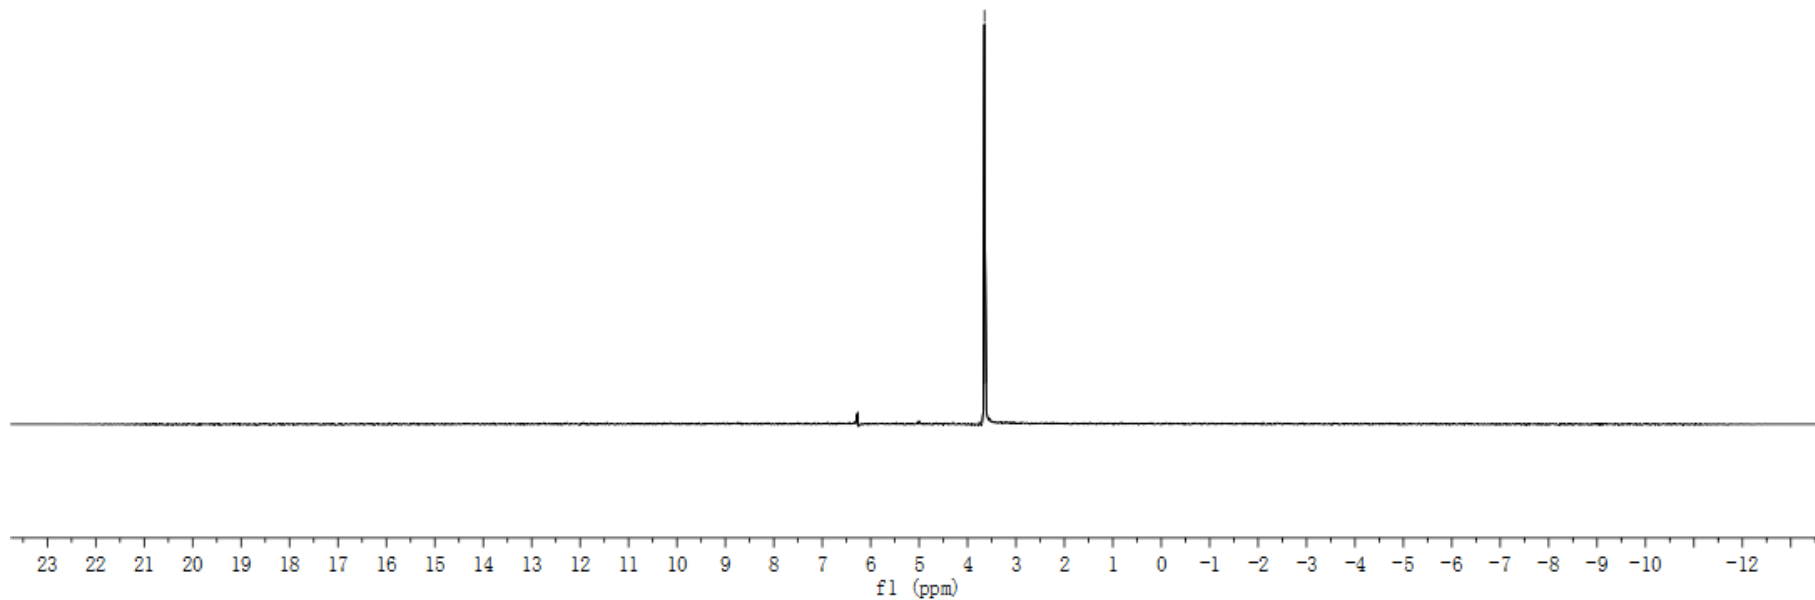

Figure S49. <sup>2</sup>H NMR spectra of 10-d<sub>3</sub> (DCM, 92 M)

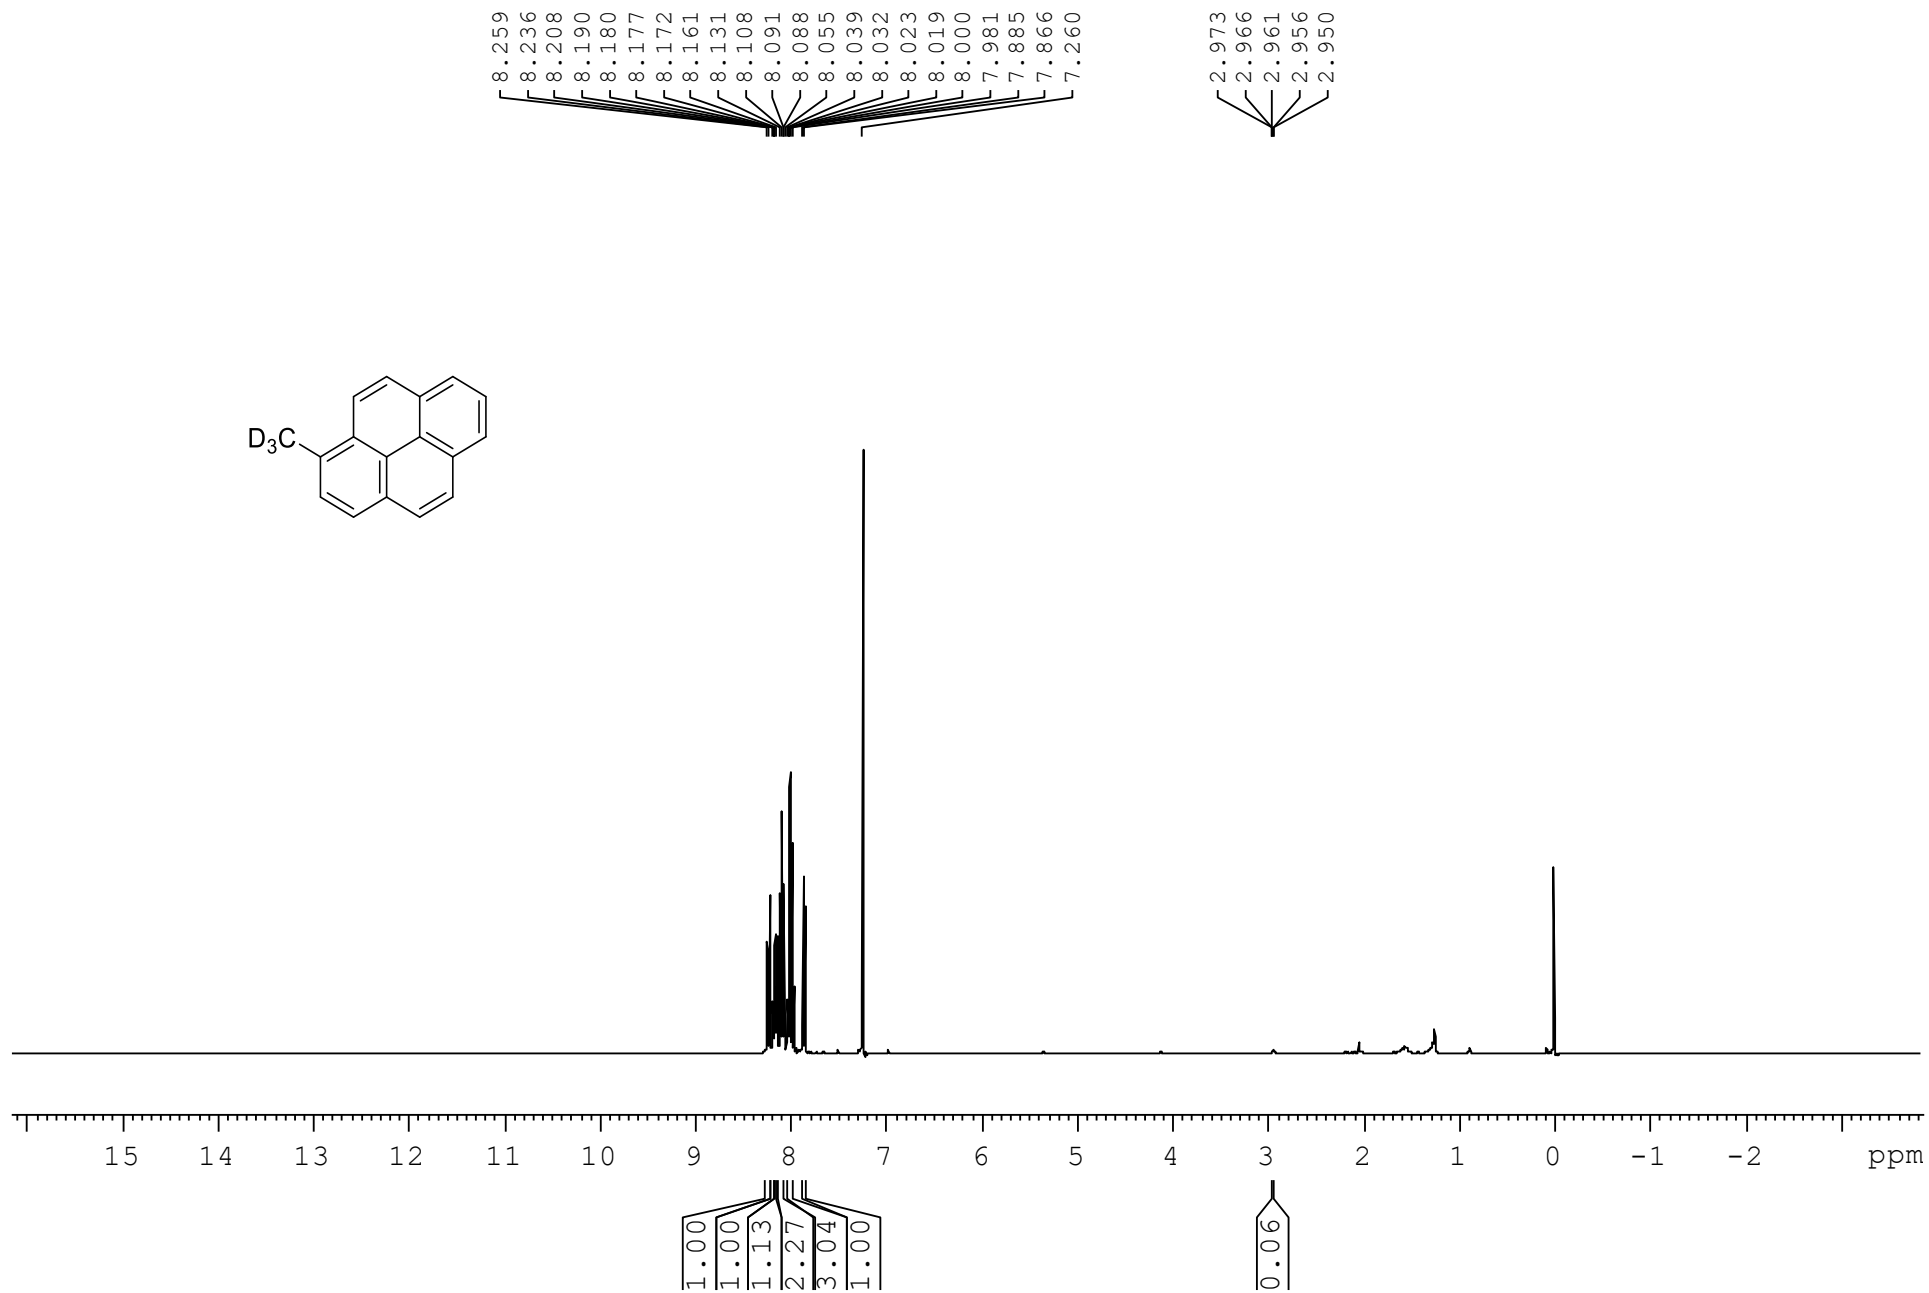

Figure S50. <sup>1</sup>H NMR spectra of **1p-d<sub>3</sub>** (CDCl<sub>3</sub>, 400 M)

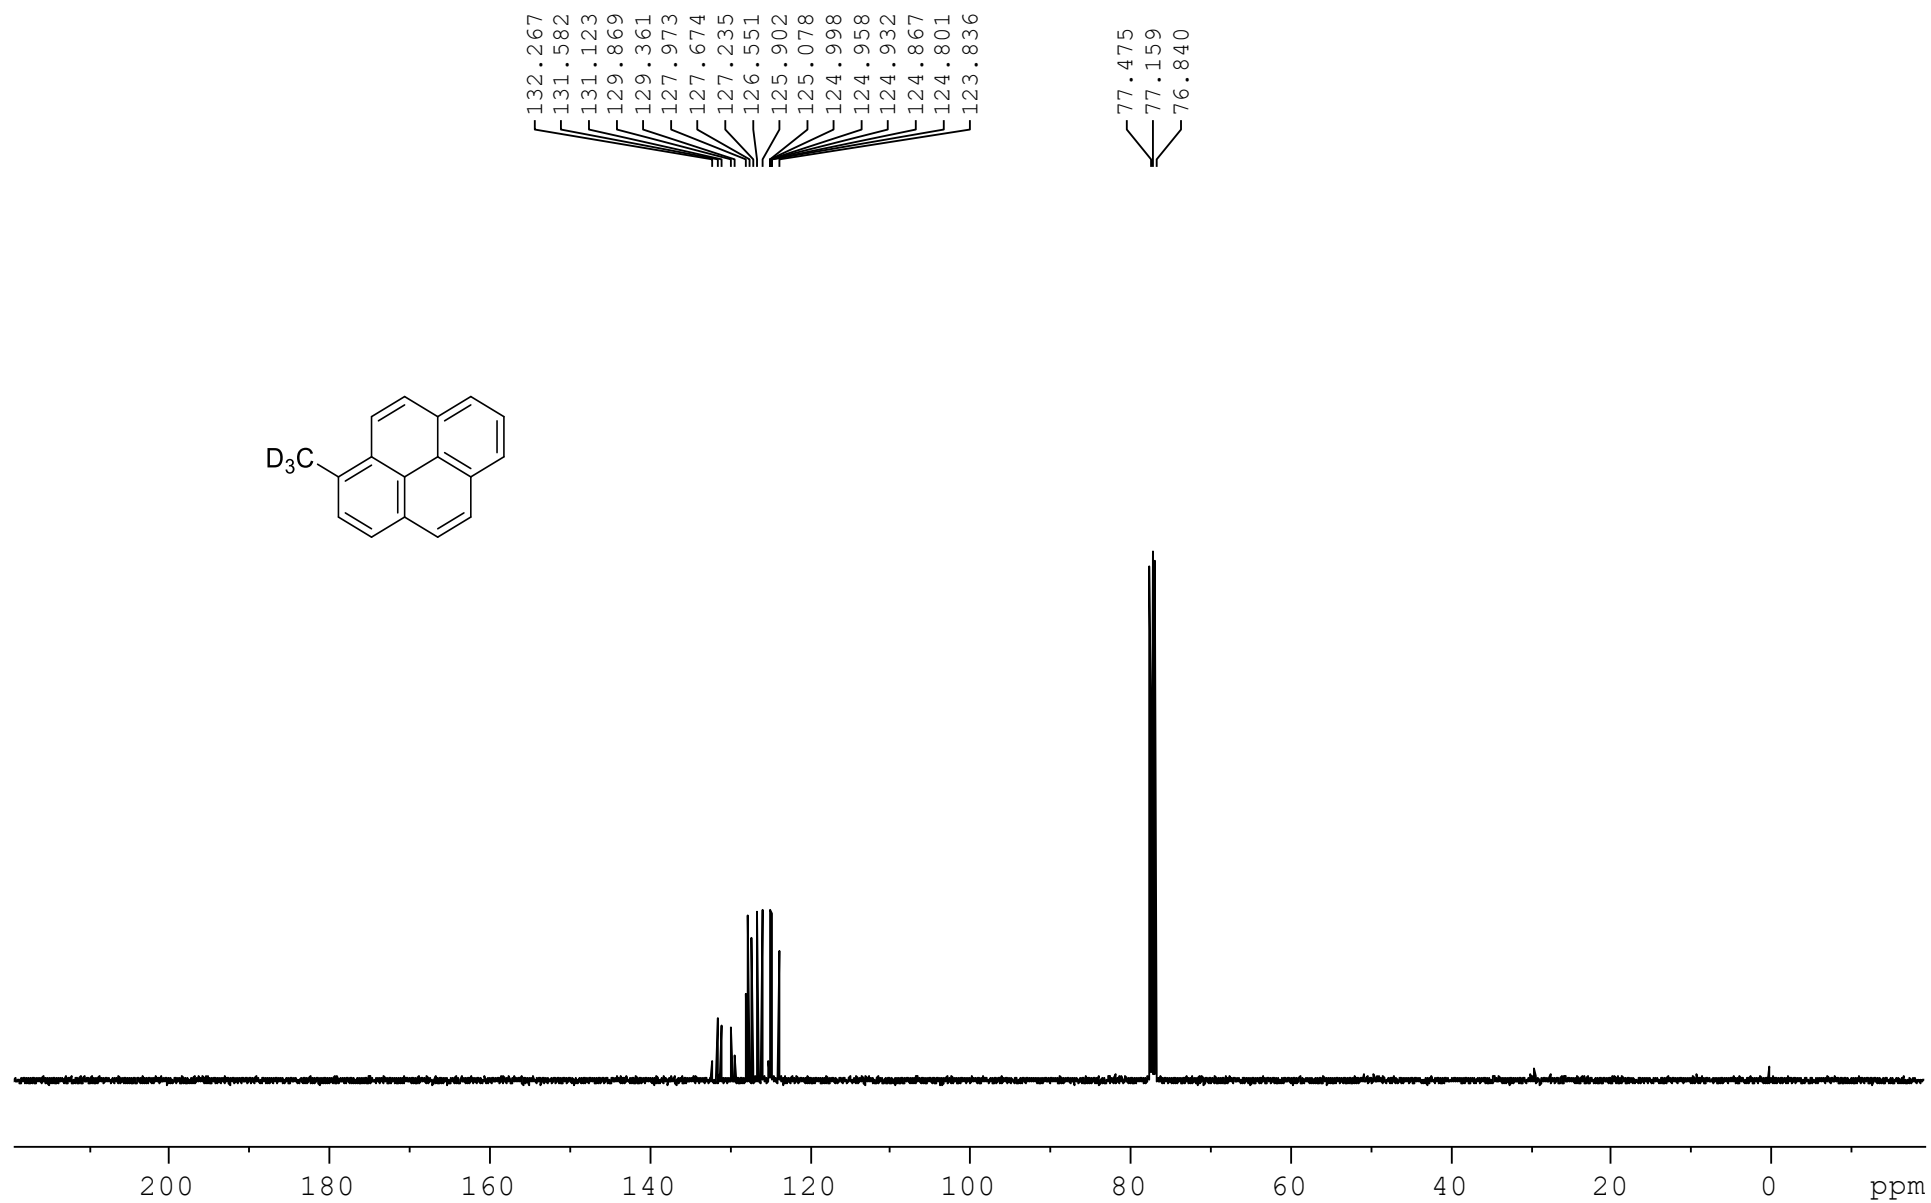

Figure S51. <sup>13</sup>C NMR spectra of **1p-d<sub>3</sub>** (CDCl<sub>3</sub>, 100 M)

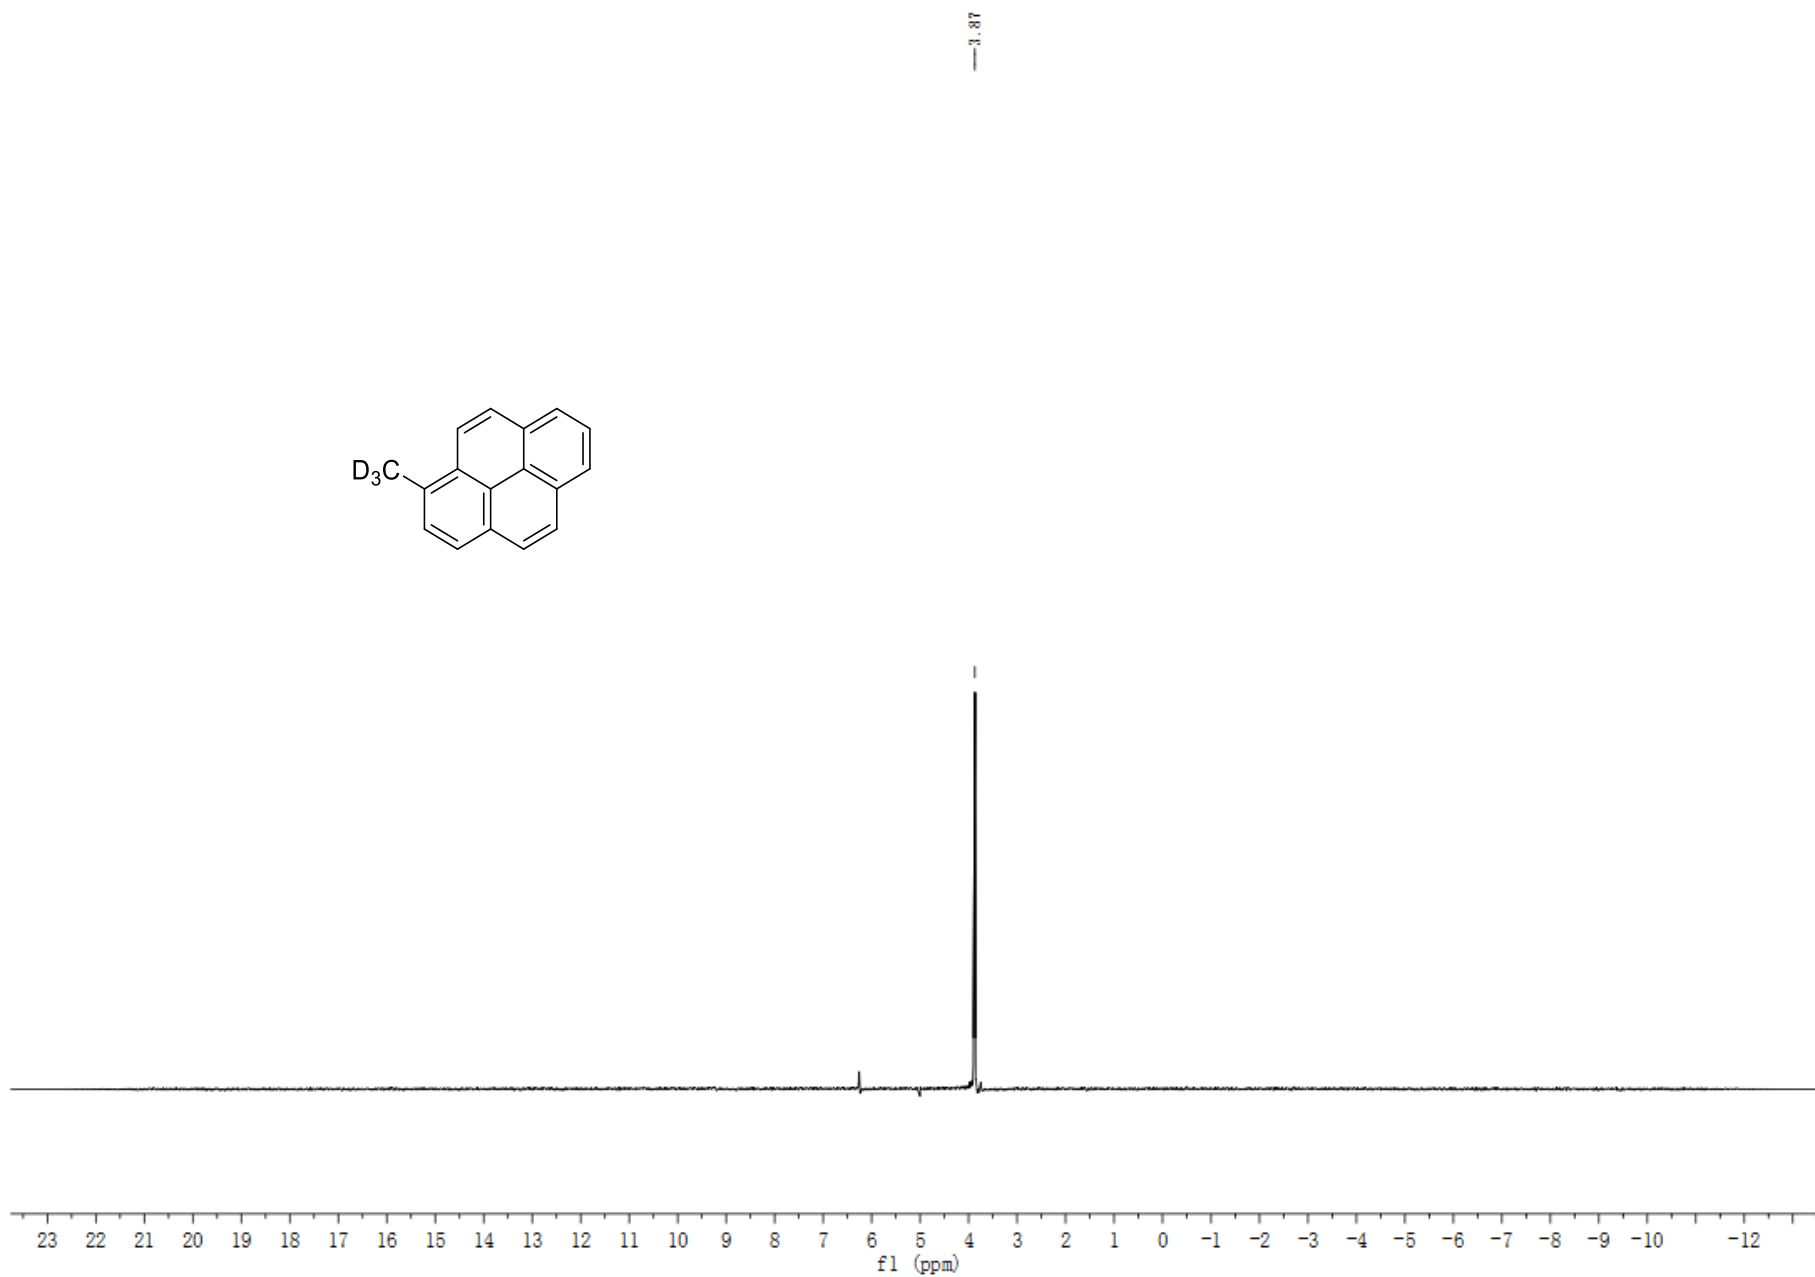

**Figure S52.**  $^2\text{H}$  NMR spectra of **1p-d<sub>3</sub>** ( $\text{DCM}$ , 92 M)

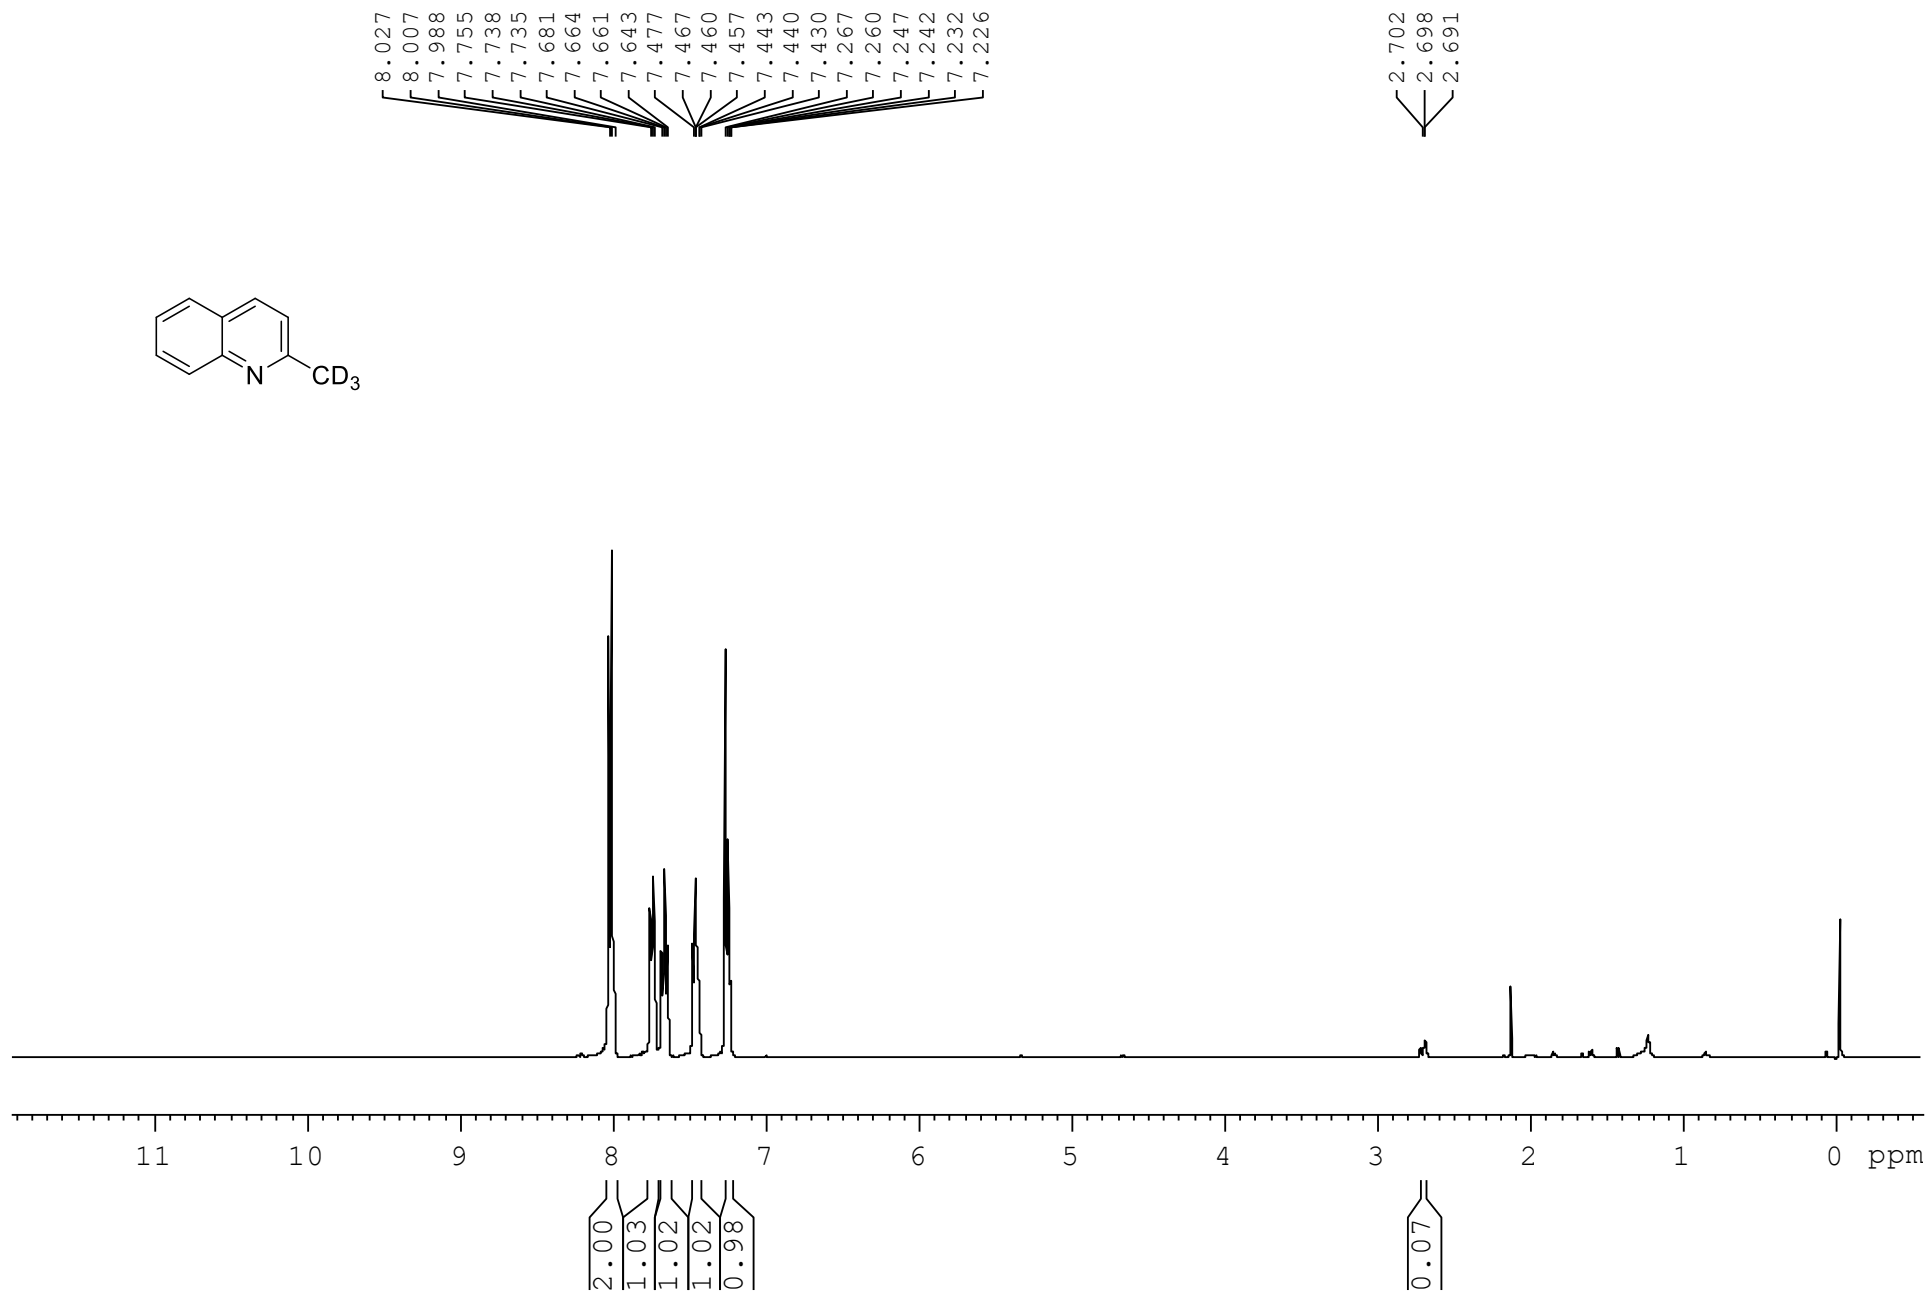

Figure S53. <sup>1</sup>H NMR spectra of **1q-d<sub>3</sub>** (CDCl<sub>3</sub>, 400 M)



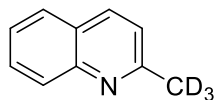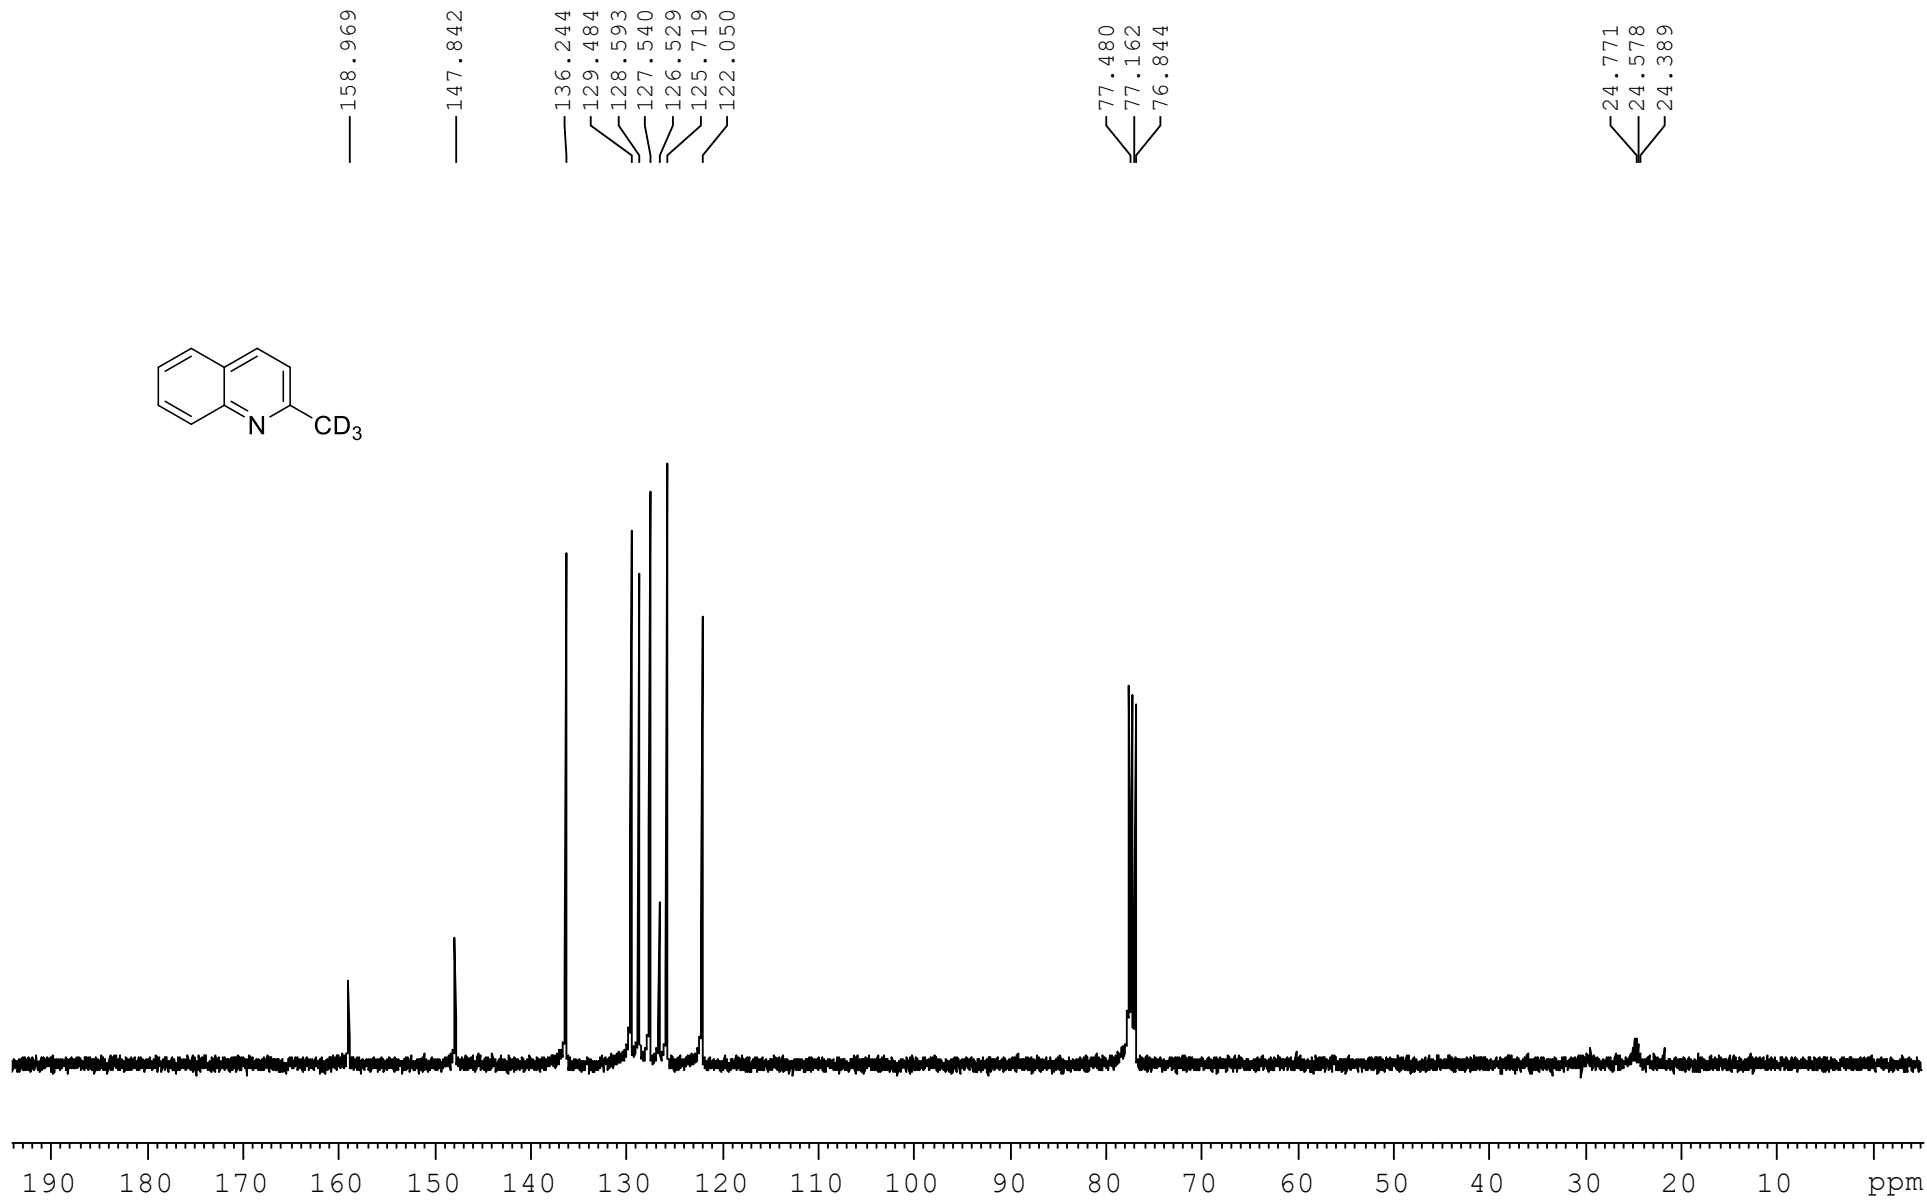

Figure S54. <sup>13</sup>C NMR spectra of 1q-d<sub>3</sub> (CDCl<sub>3</sub>, 100 M)

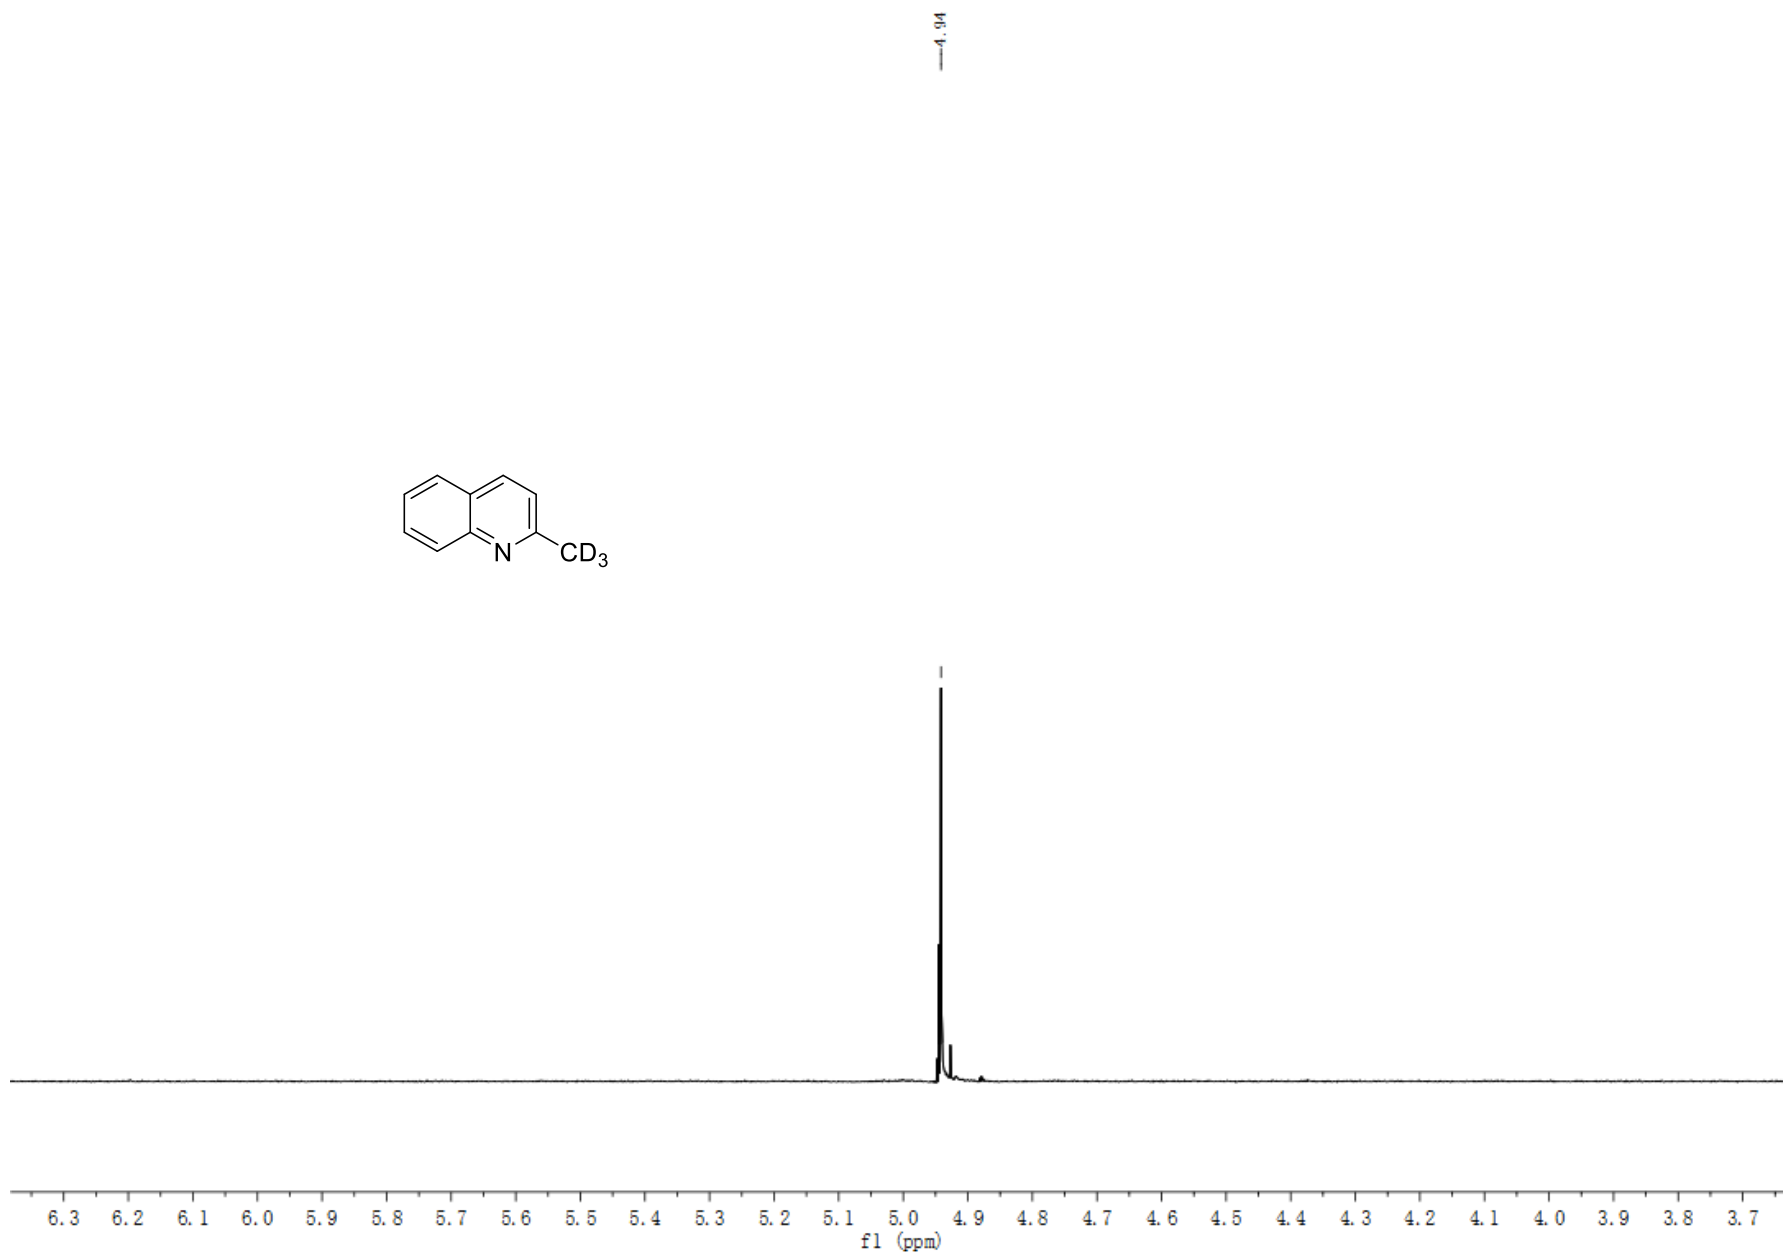

**Figure S55.**  $^2\text{H}$  NMR spectra of **1q-*d*<sub>3</sub>** ( $\text{MeCN}$ , 92 M)

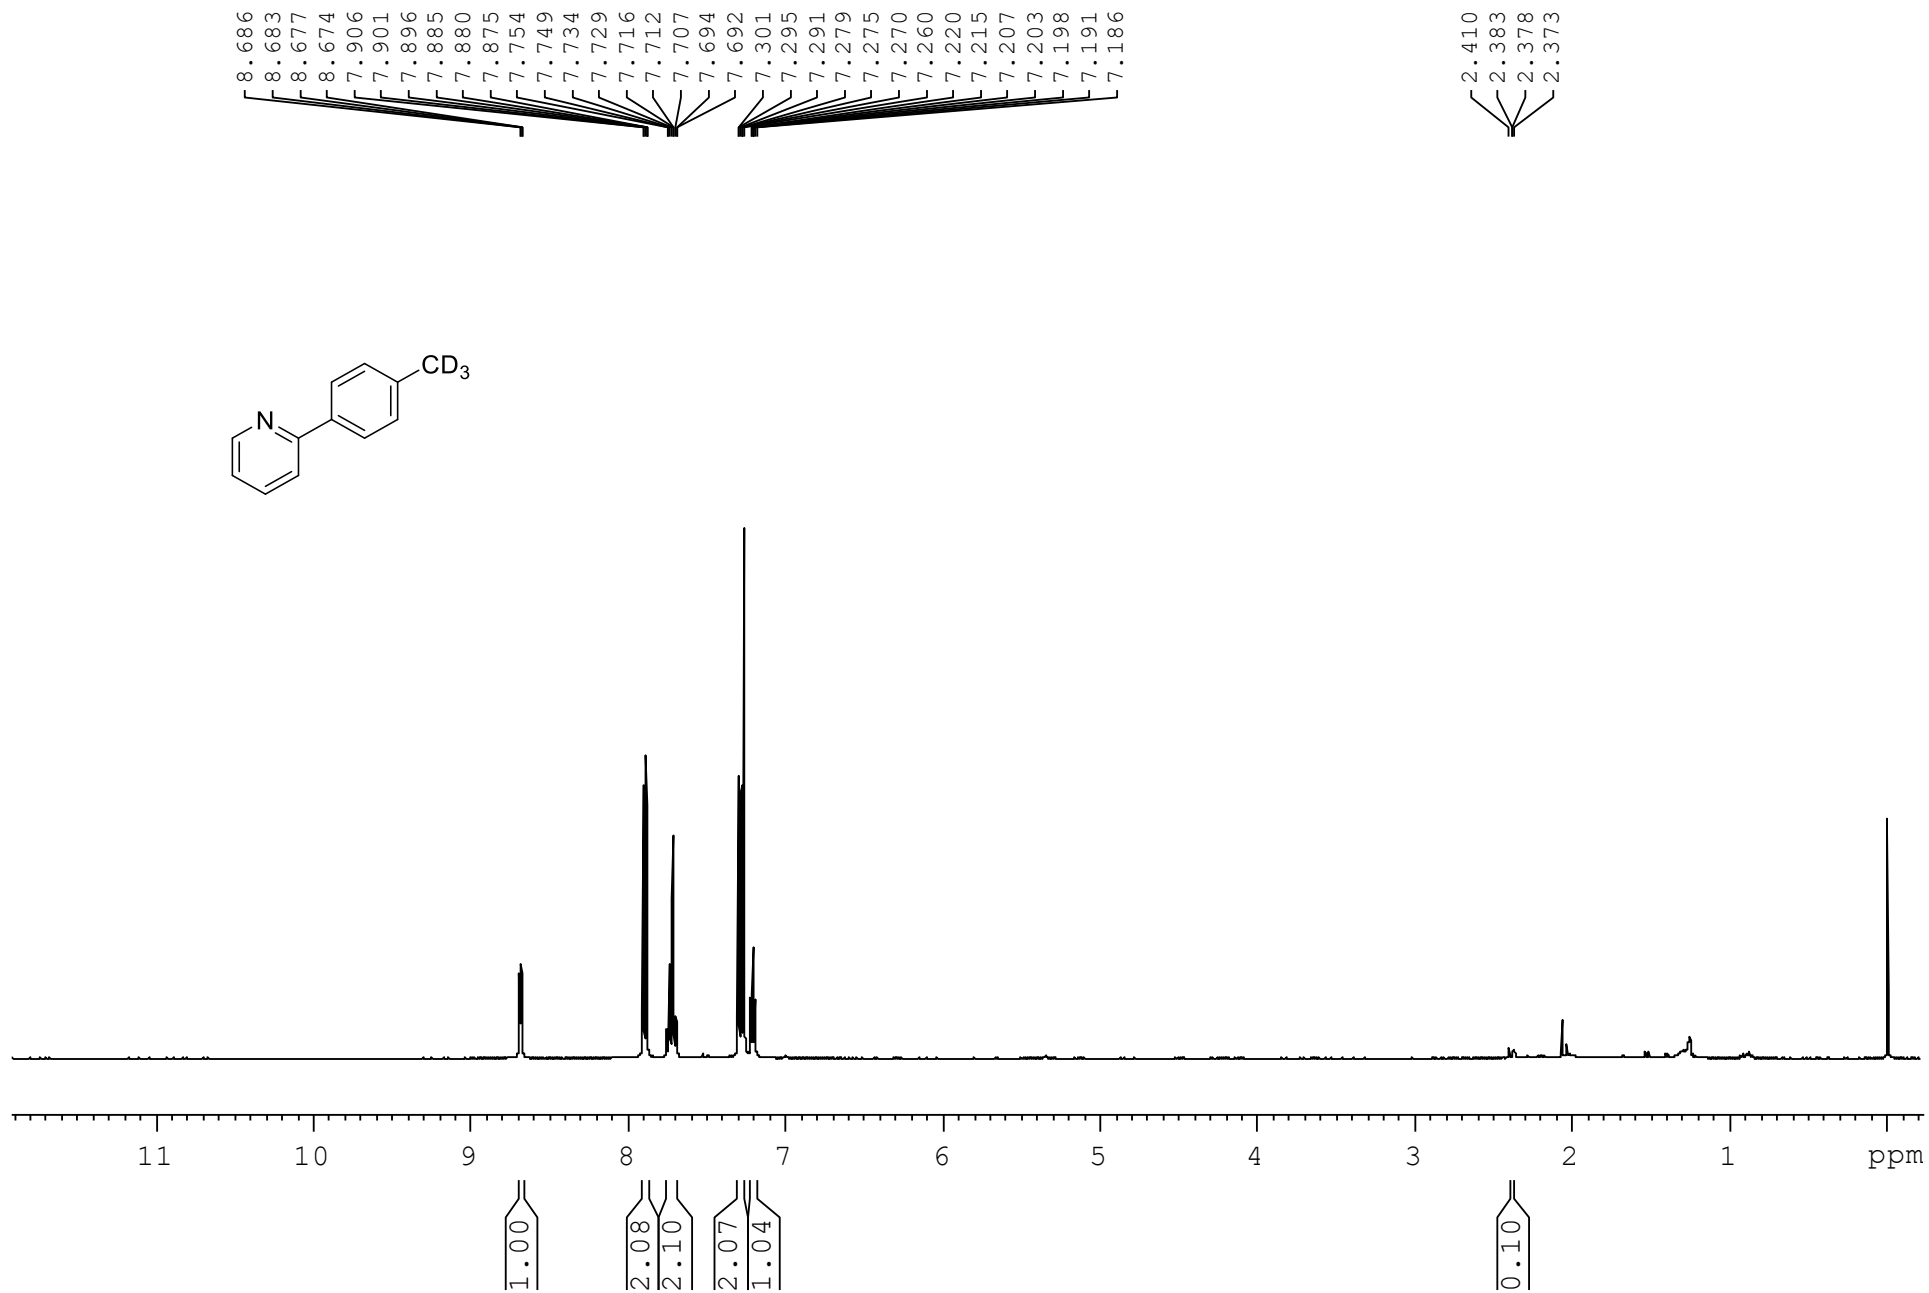

Figure S56. <sup>1</sup>H NMR spectra of **1r-d<sub>3</sub>** (CDCl<sub>3</sub>, 400 M)

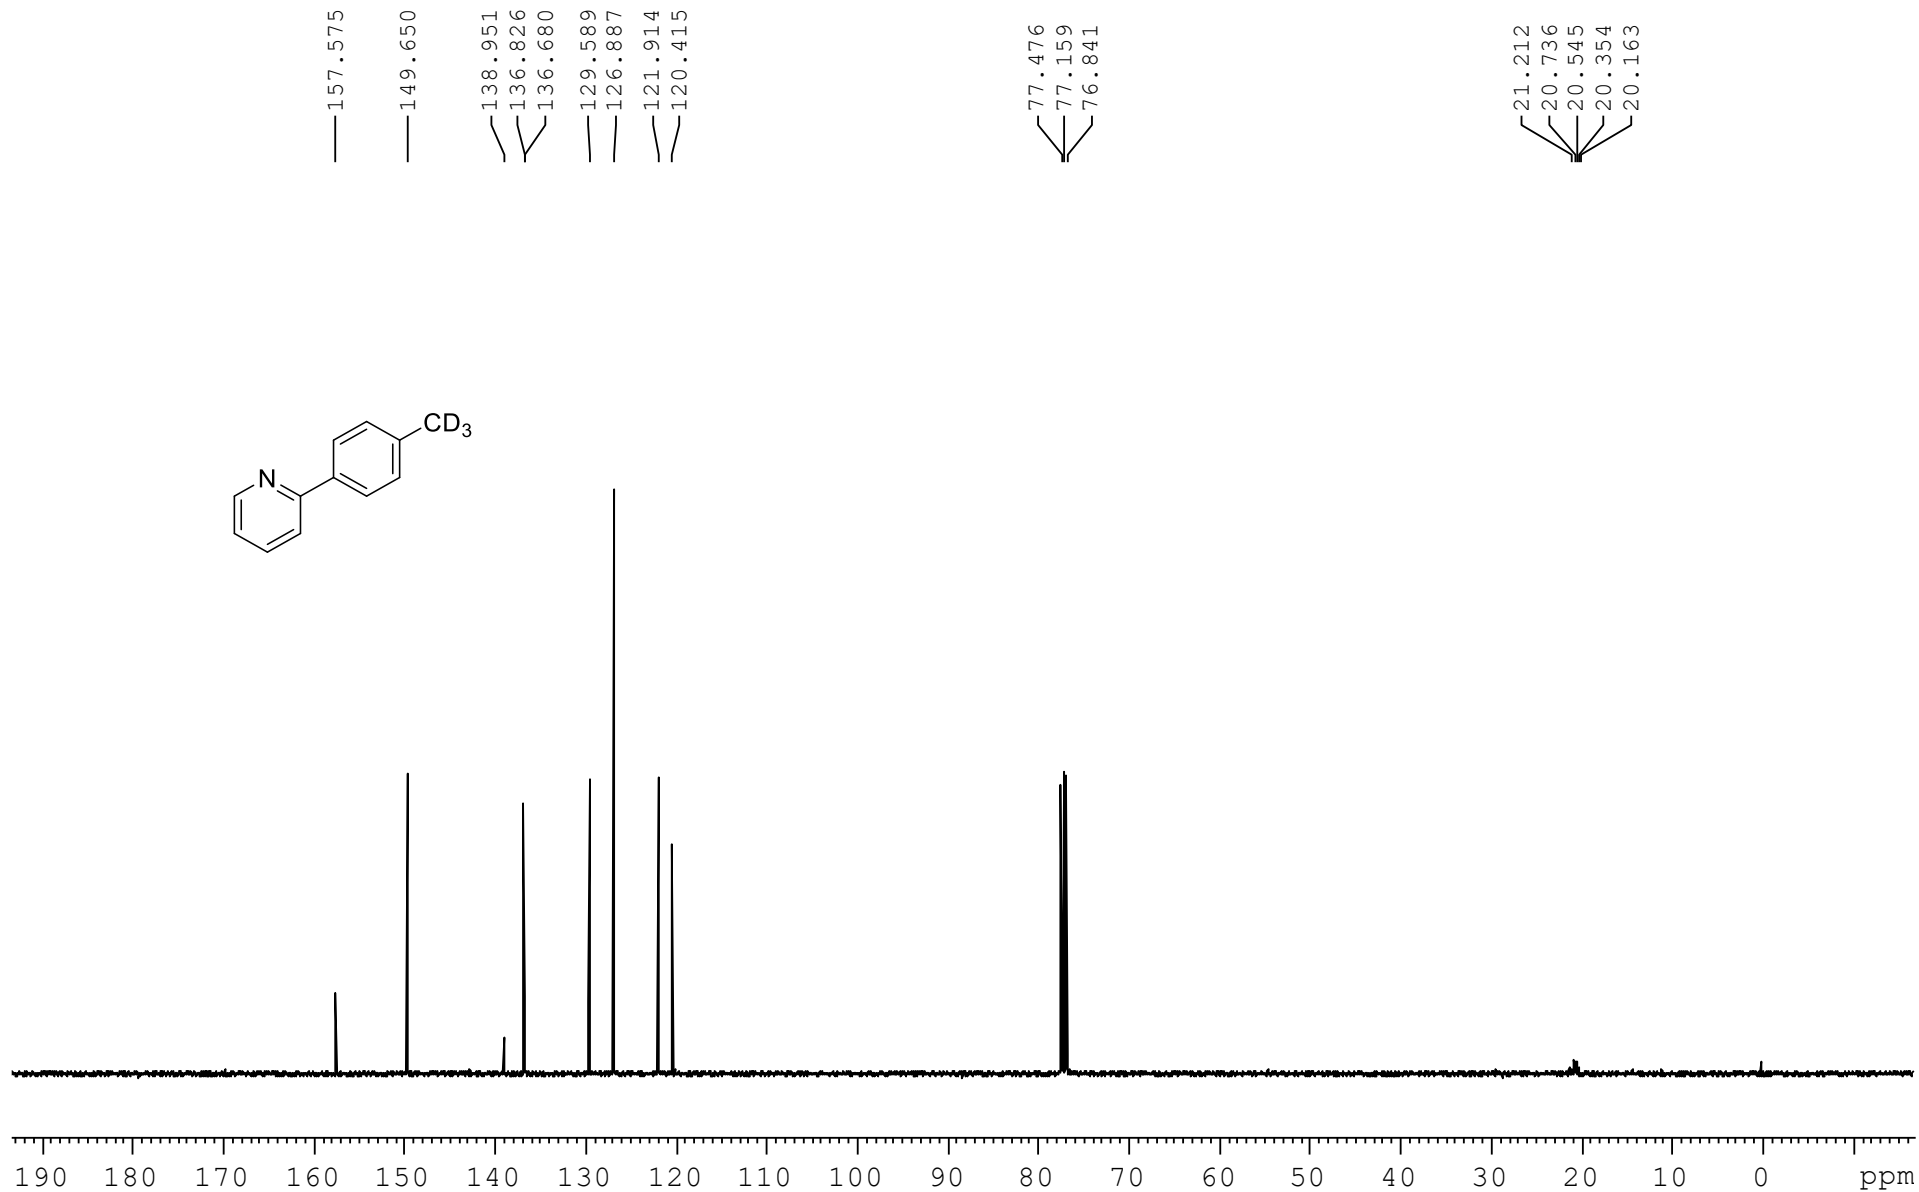

Figure S57. <sup>13</sup>C NMR spectra of **1r-d<sub>3</sub>** (CDCl<sub>3</sub>, 100 M)

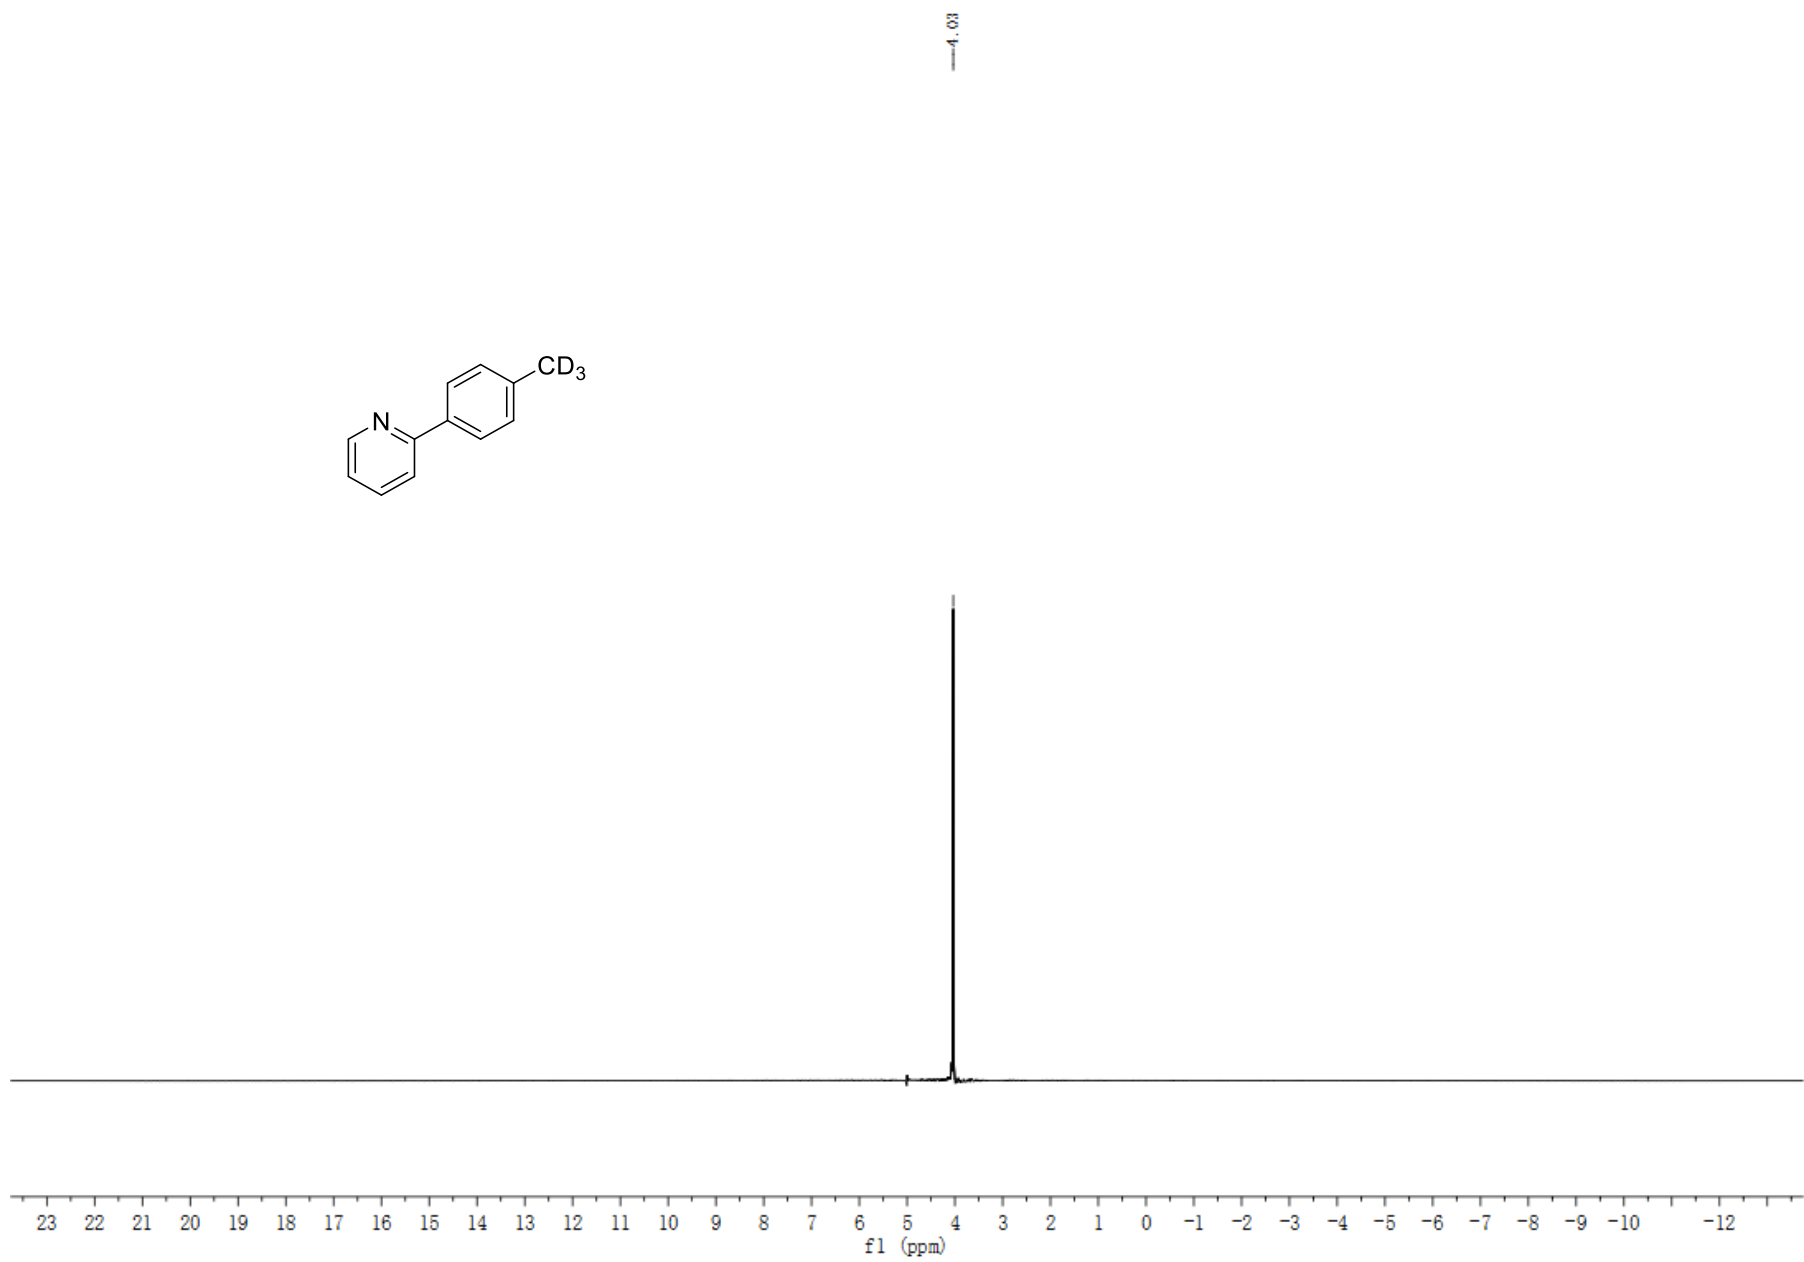

Figure S58.  $^2\text{H}$  NMR spectra of **1r-d<sub>3</sub>** (MeCN, 92 M)

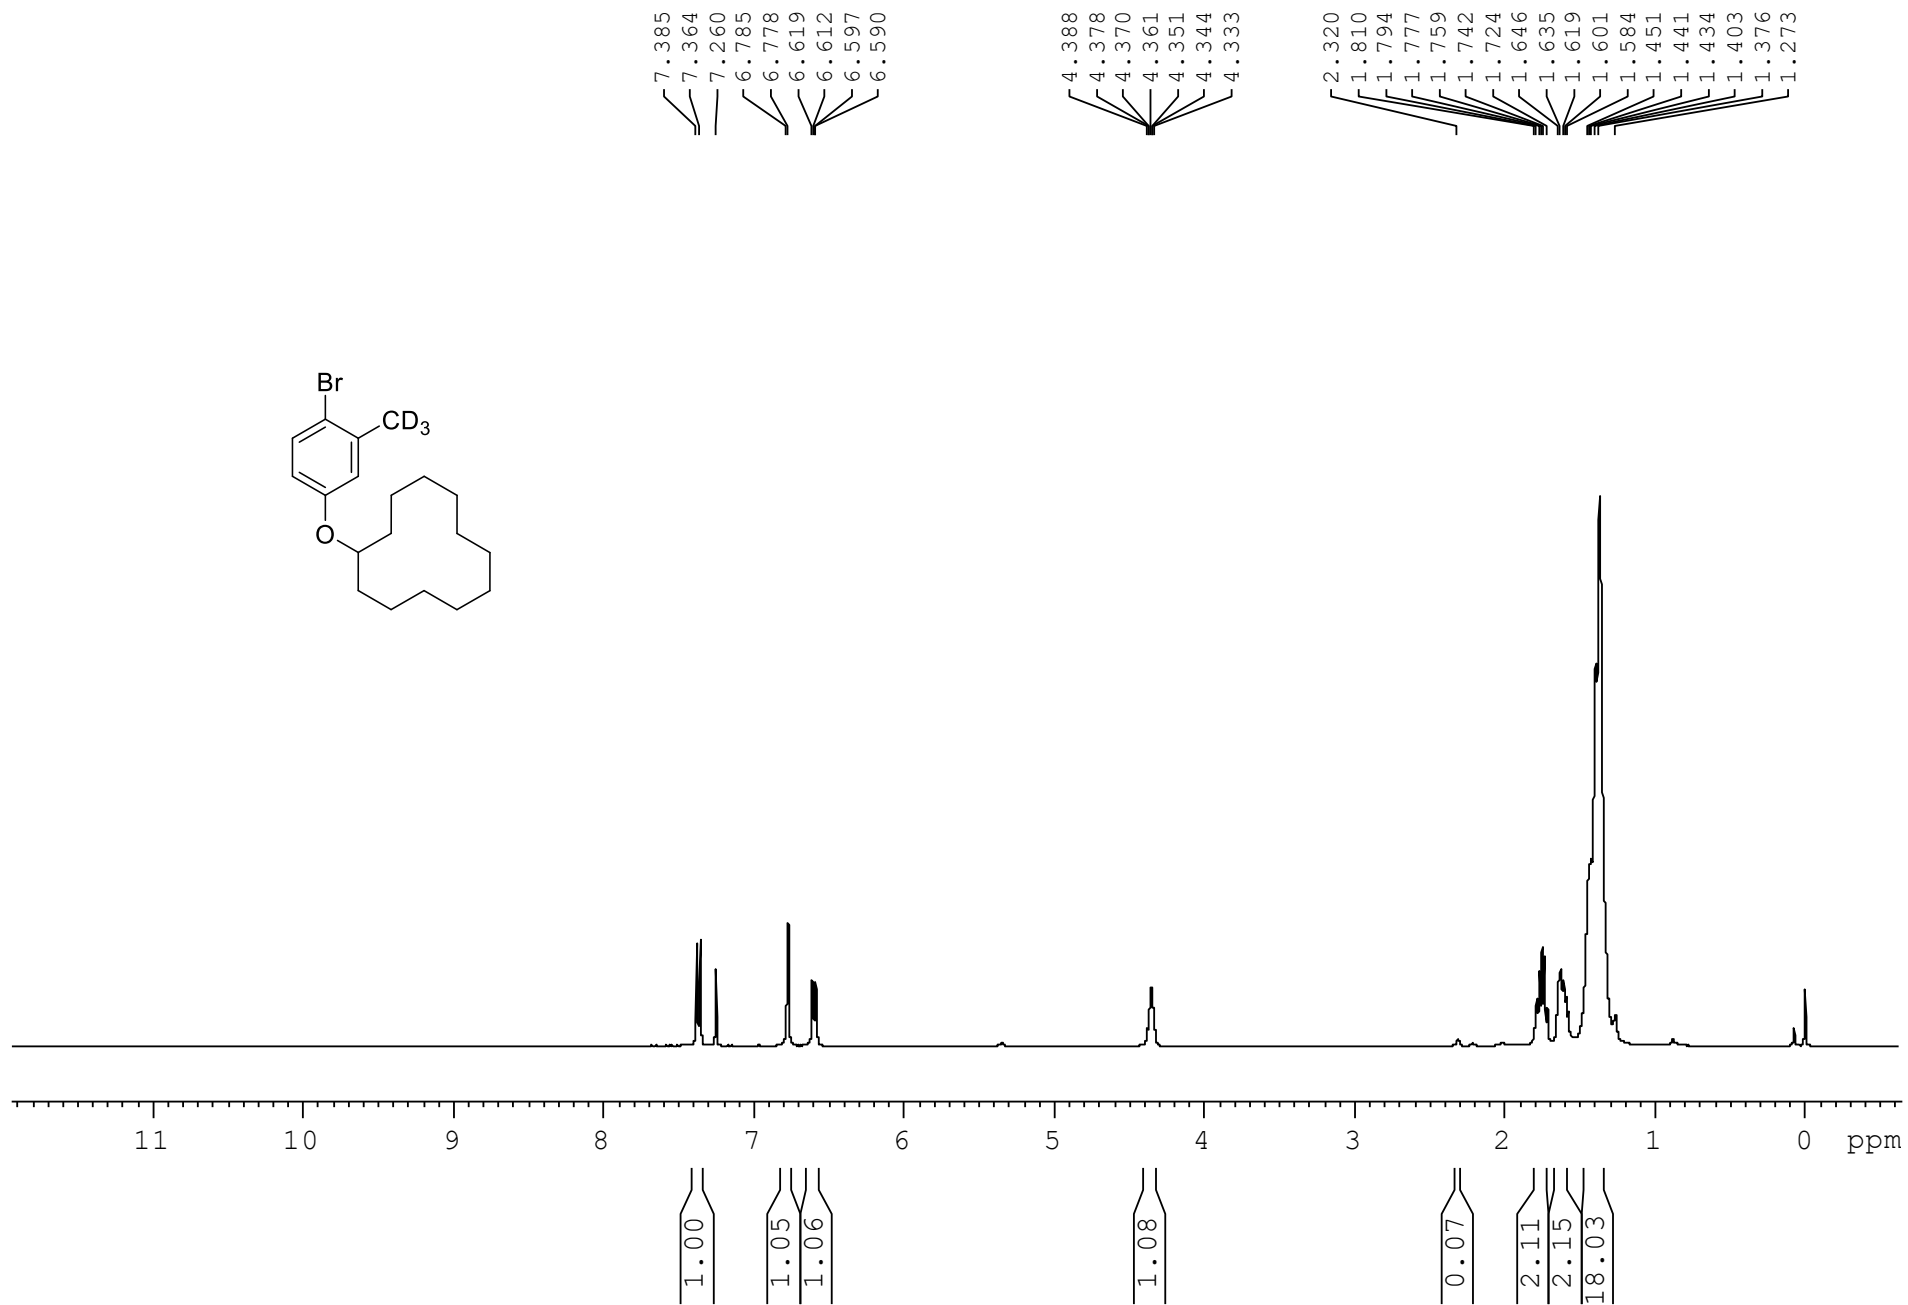

**Figure S59.** <sup>1</sup>H NMR spectra of **1s-d<sub>3</sub>** (CDCl<sub>3</sub>, 400 M)

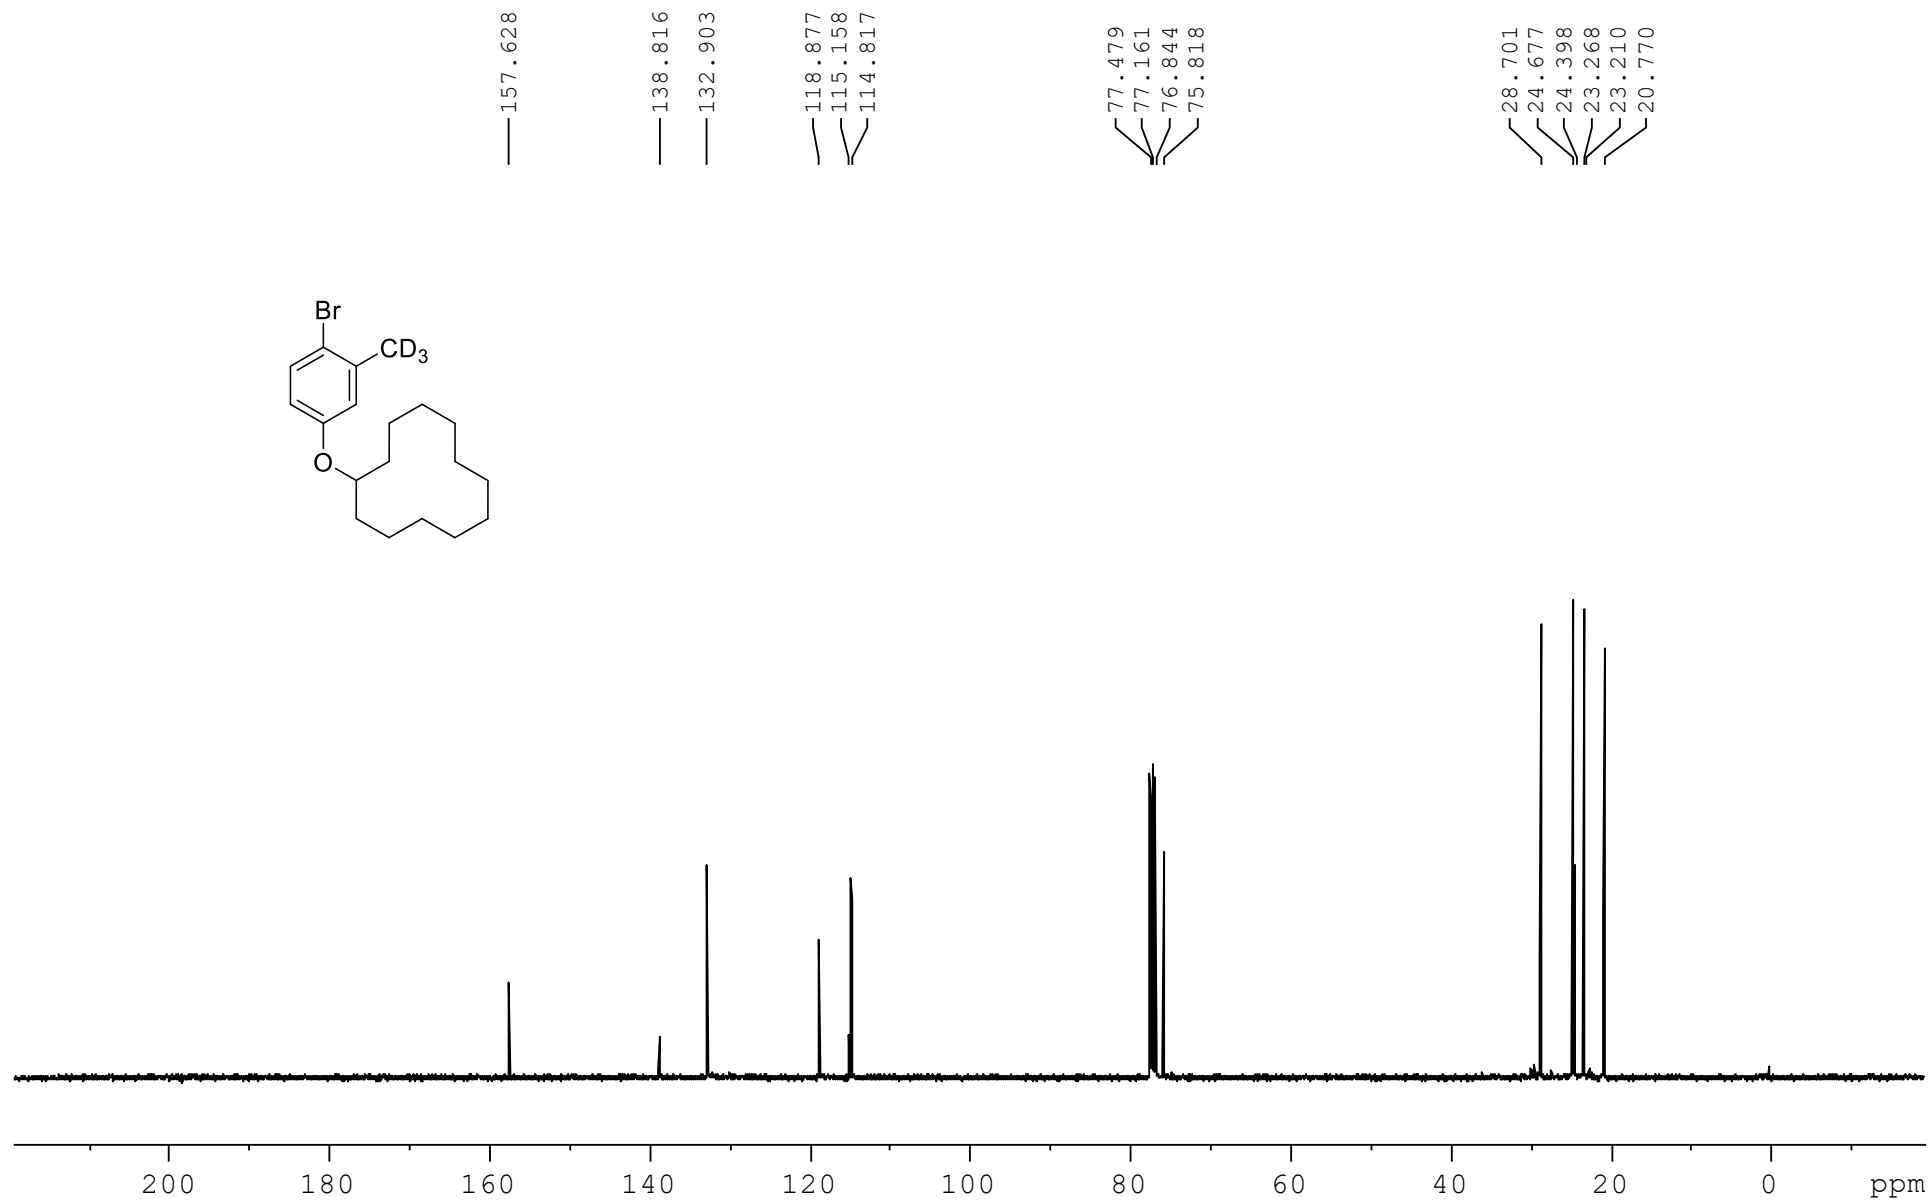

**Figure S60.** <sup>13</sup>C NMR spectra of **1s-d<sub>3</sub>** (CDCl<sub>3</sub>, 100 M)

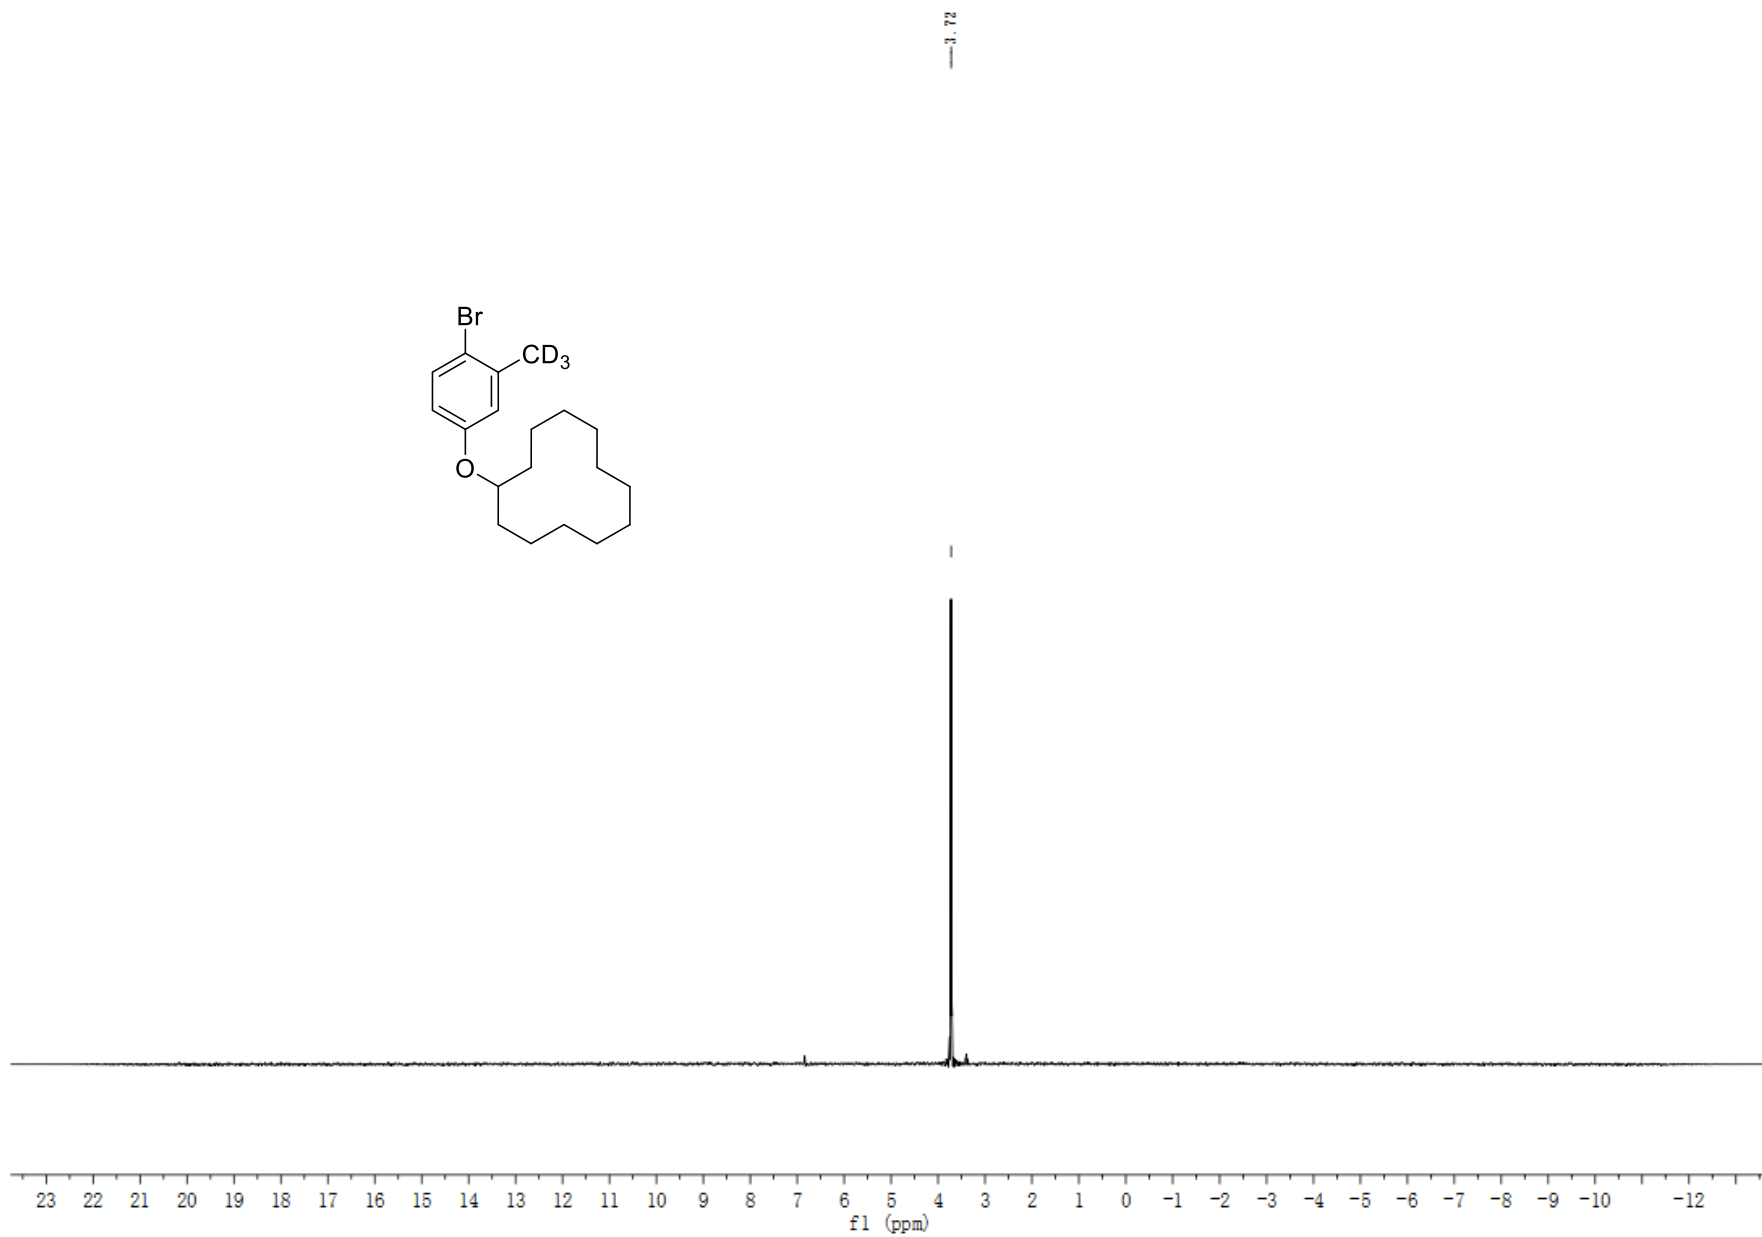

Figure S61. <sup>2</sup>H NMR spectra of 1s-d<sub>3</sub> (DCM, 92 M)



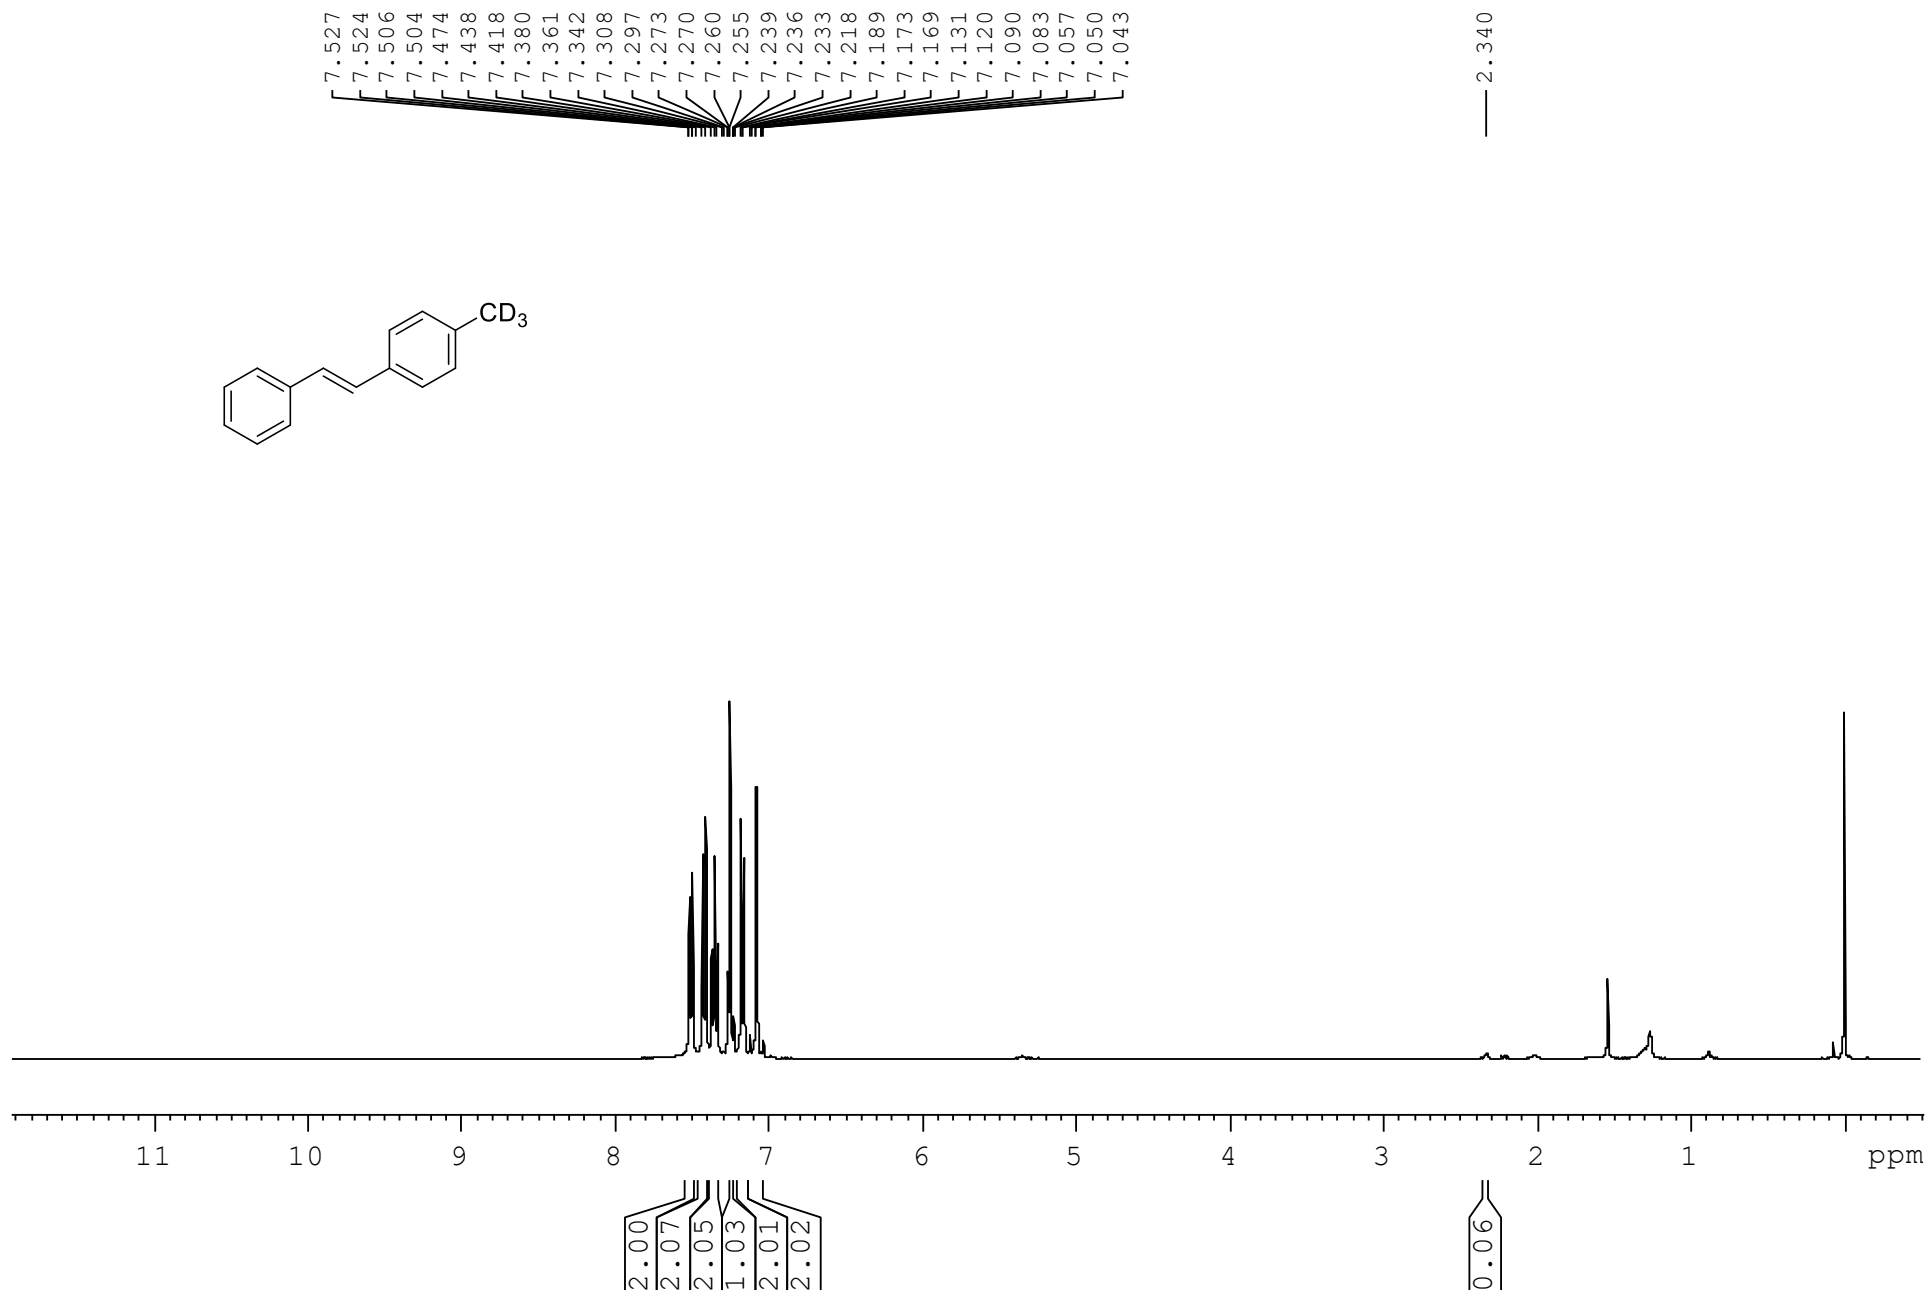

Figure S62. <sup>1</sup>H NMR spectra of 1t-d<sub>3</sub> (CDCl<sub>3</sub>, 400 M)

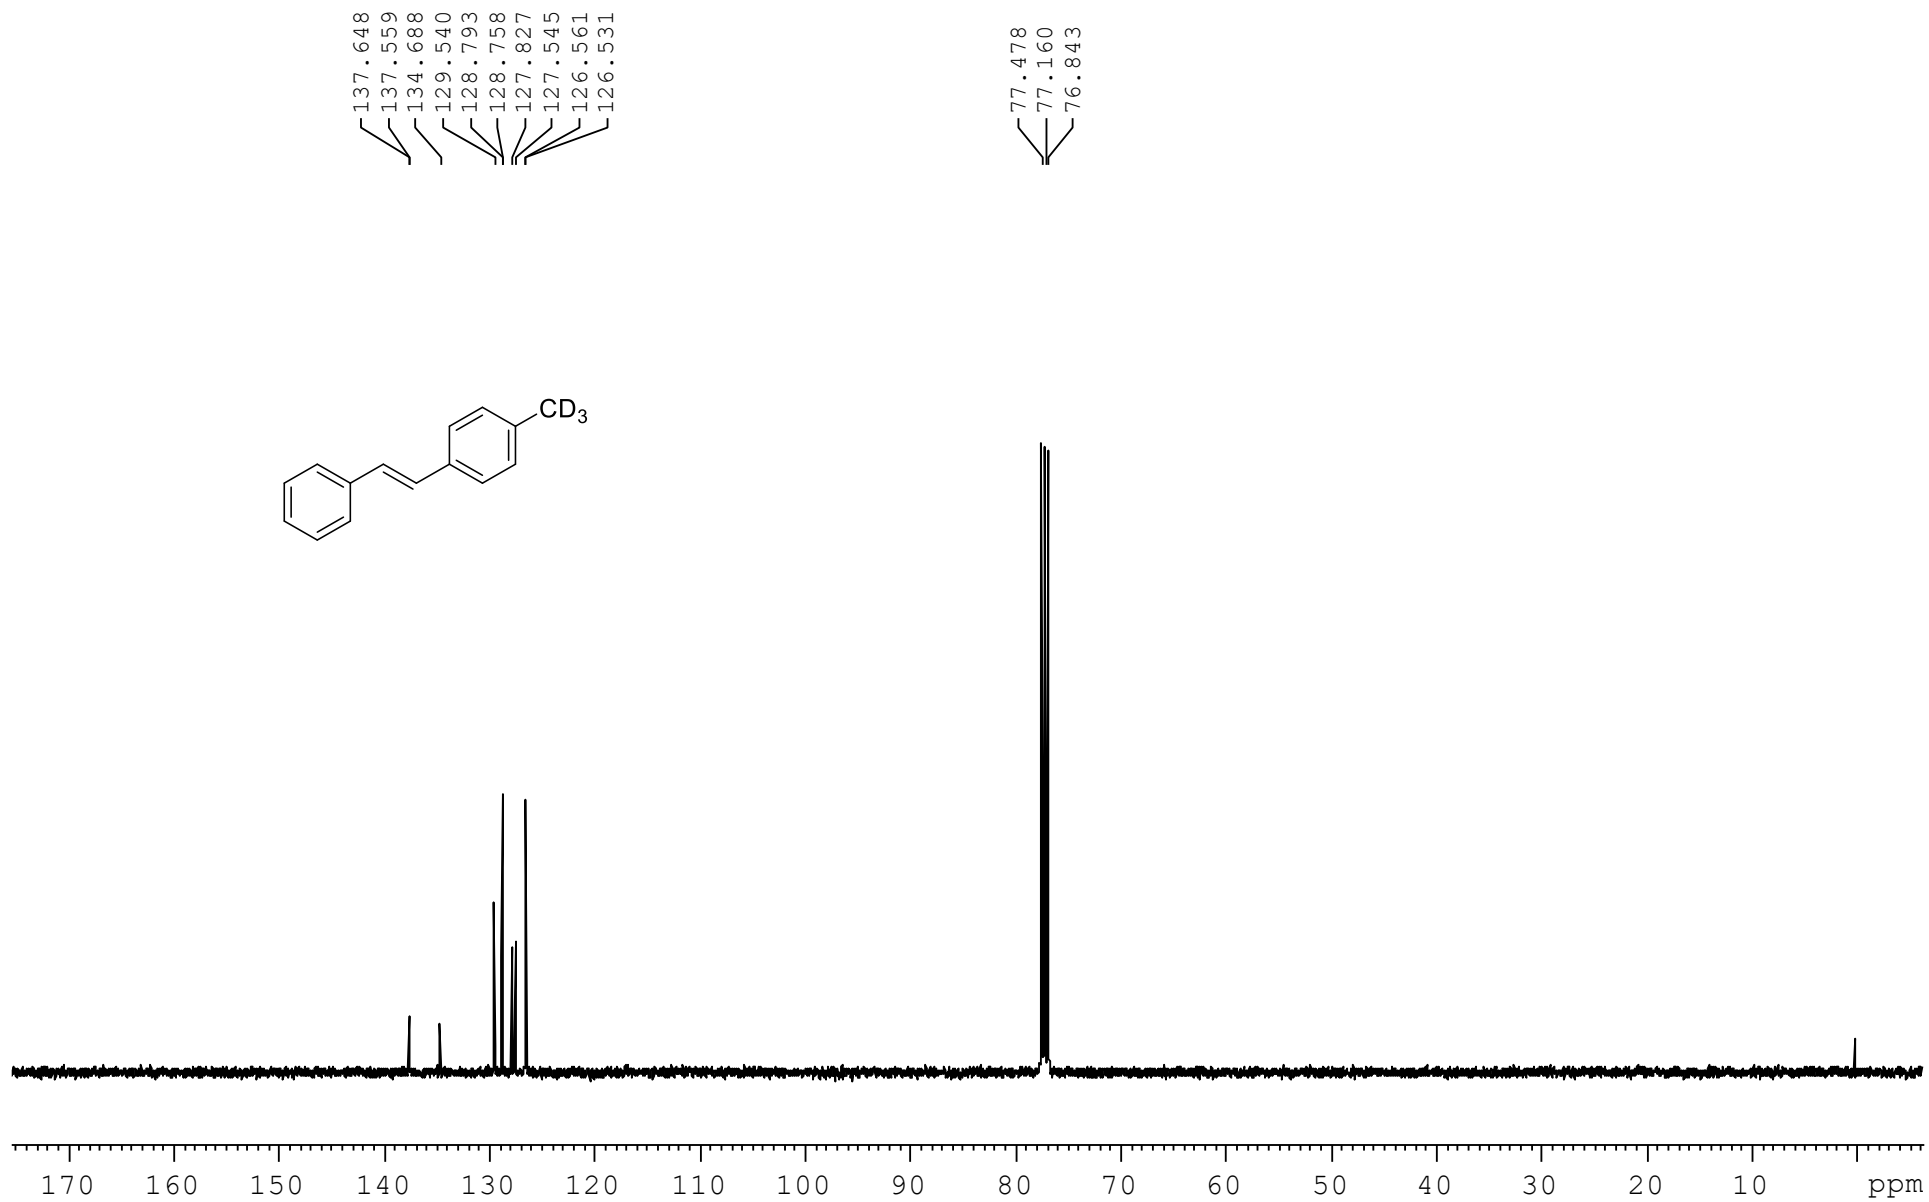

Figure S63. <sup>13</sup>C NMR spectra of **1t-d<sub>3</sub>** (CDCl<sub>3</sub>, 100 M)

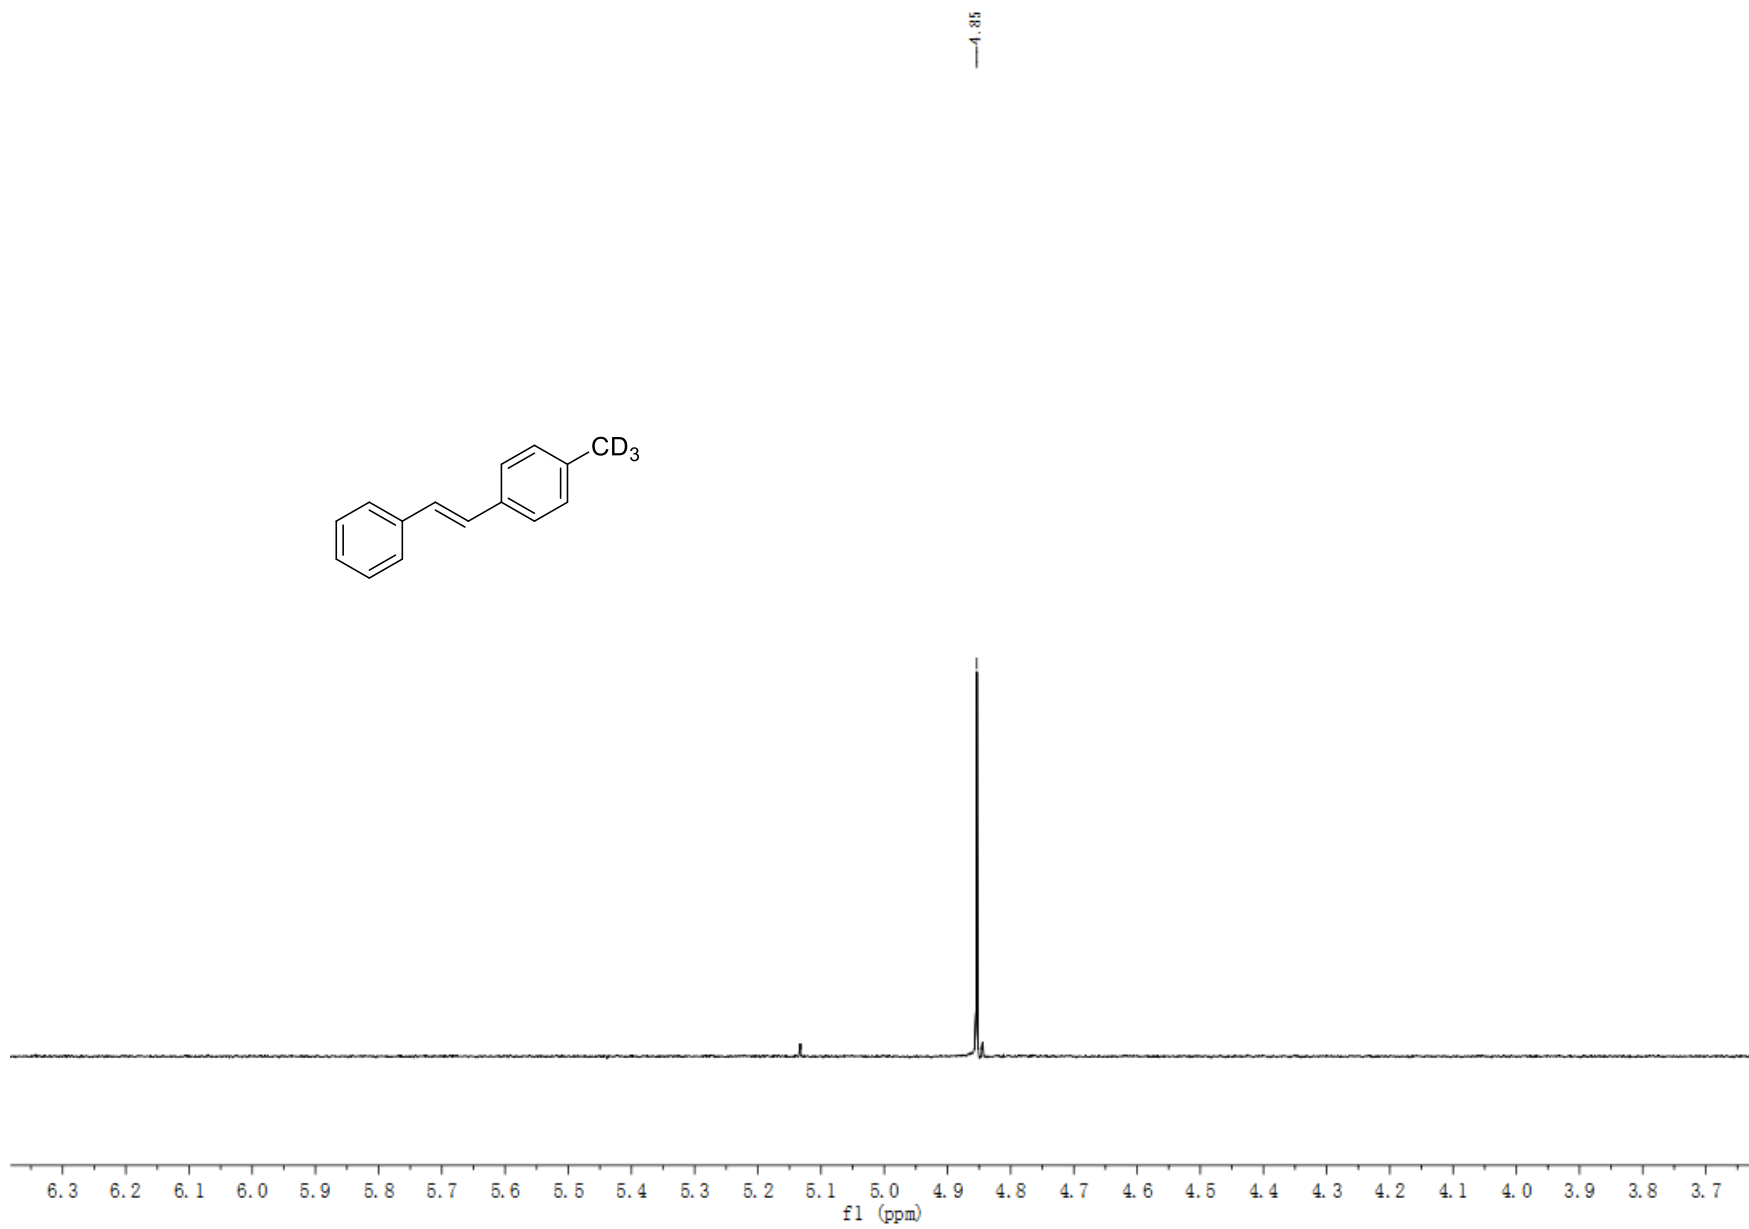

**Figure S64.** <sup>2</sup>H NMR spectra of **1t-d<sub>3</sub>** (DCM, 92 M)

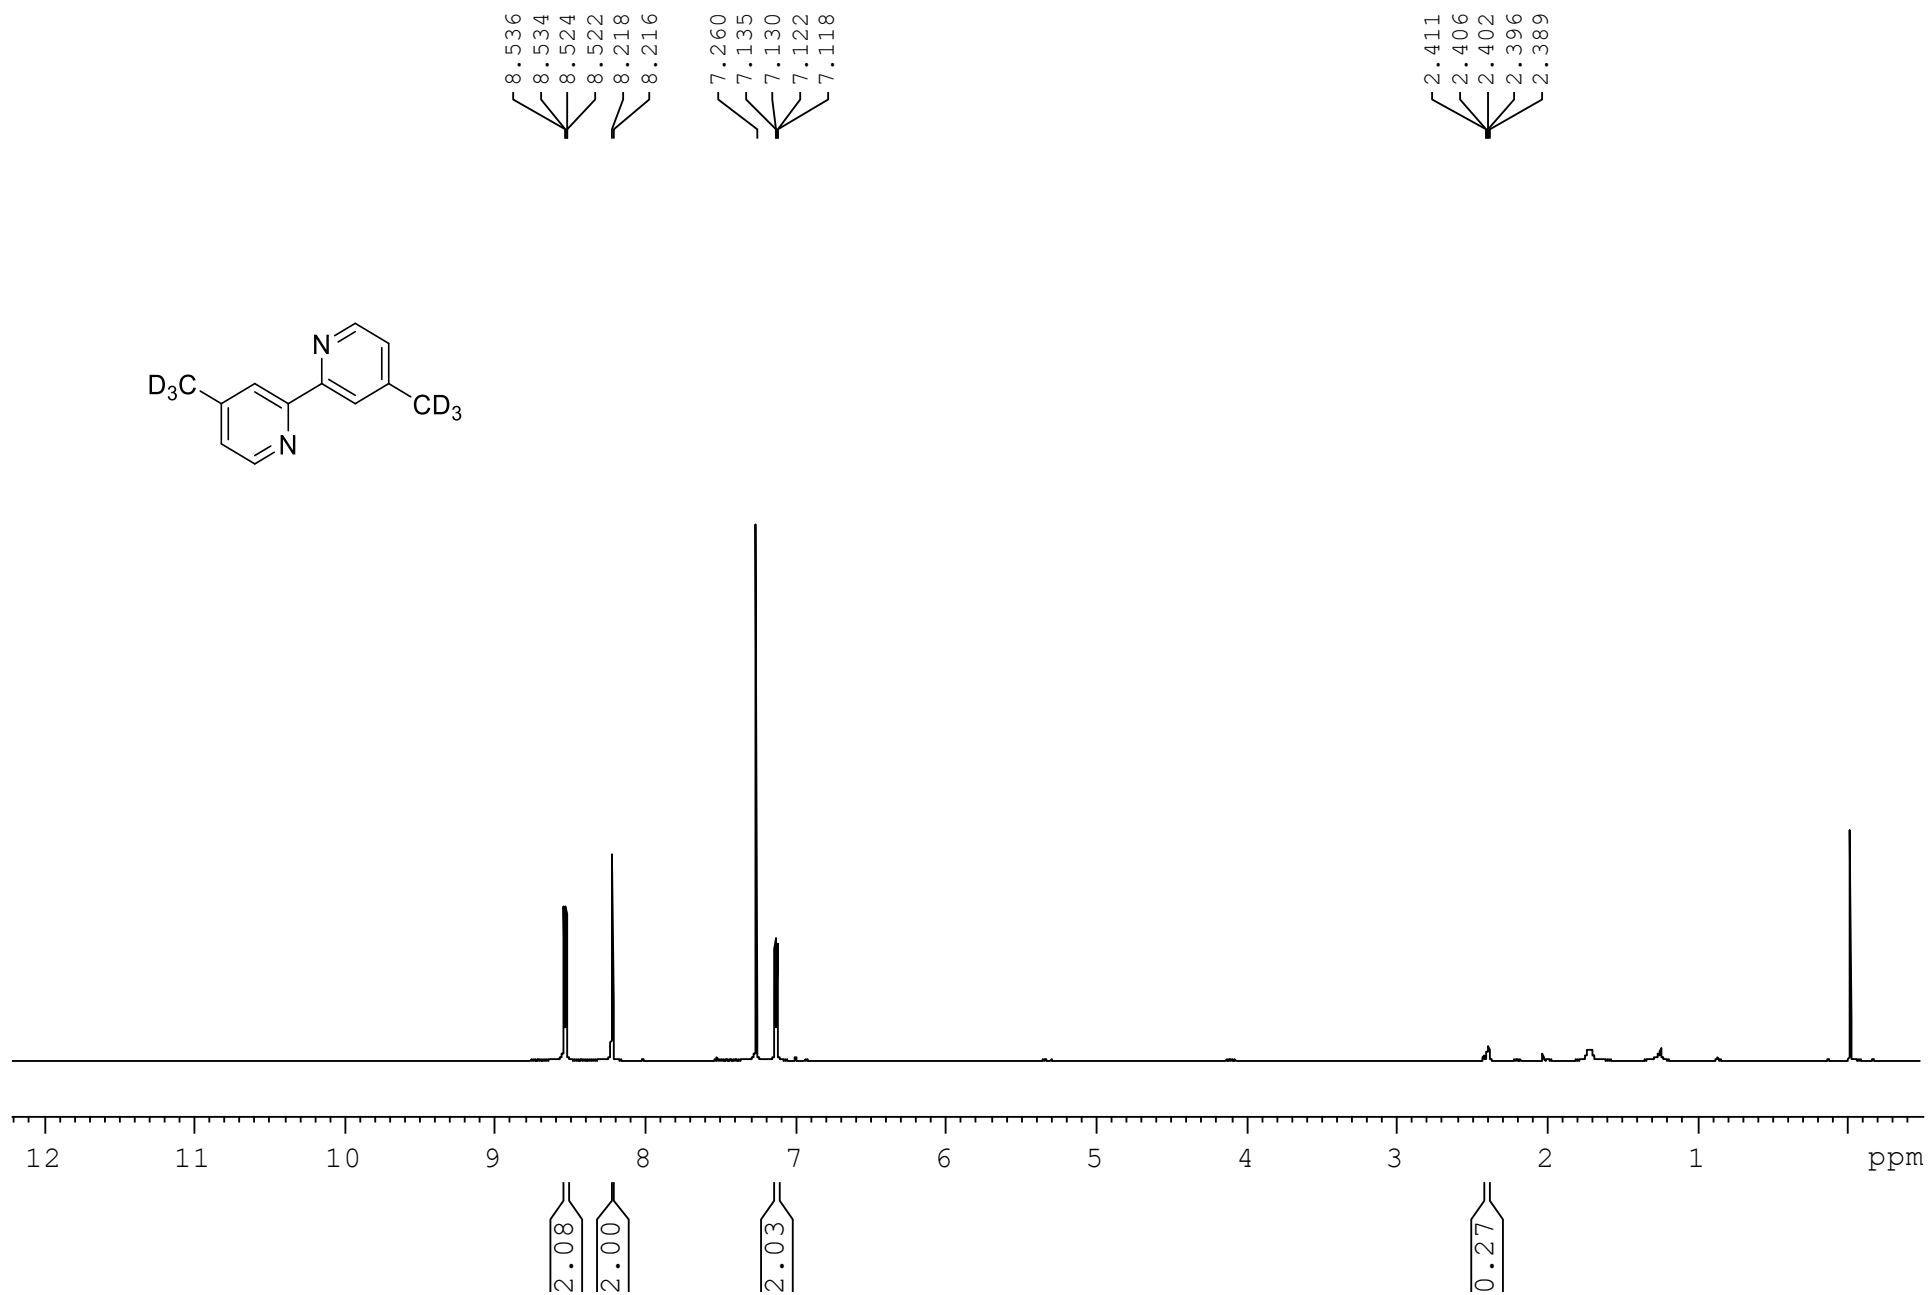

Figure S65. <sup>1</sup>H NMR spectra of **1u-d<sub>6</sub>** (CDCl<sub>3</sub>, 400 M)

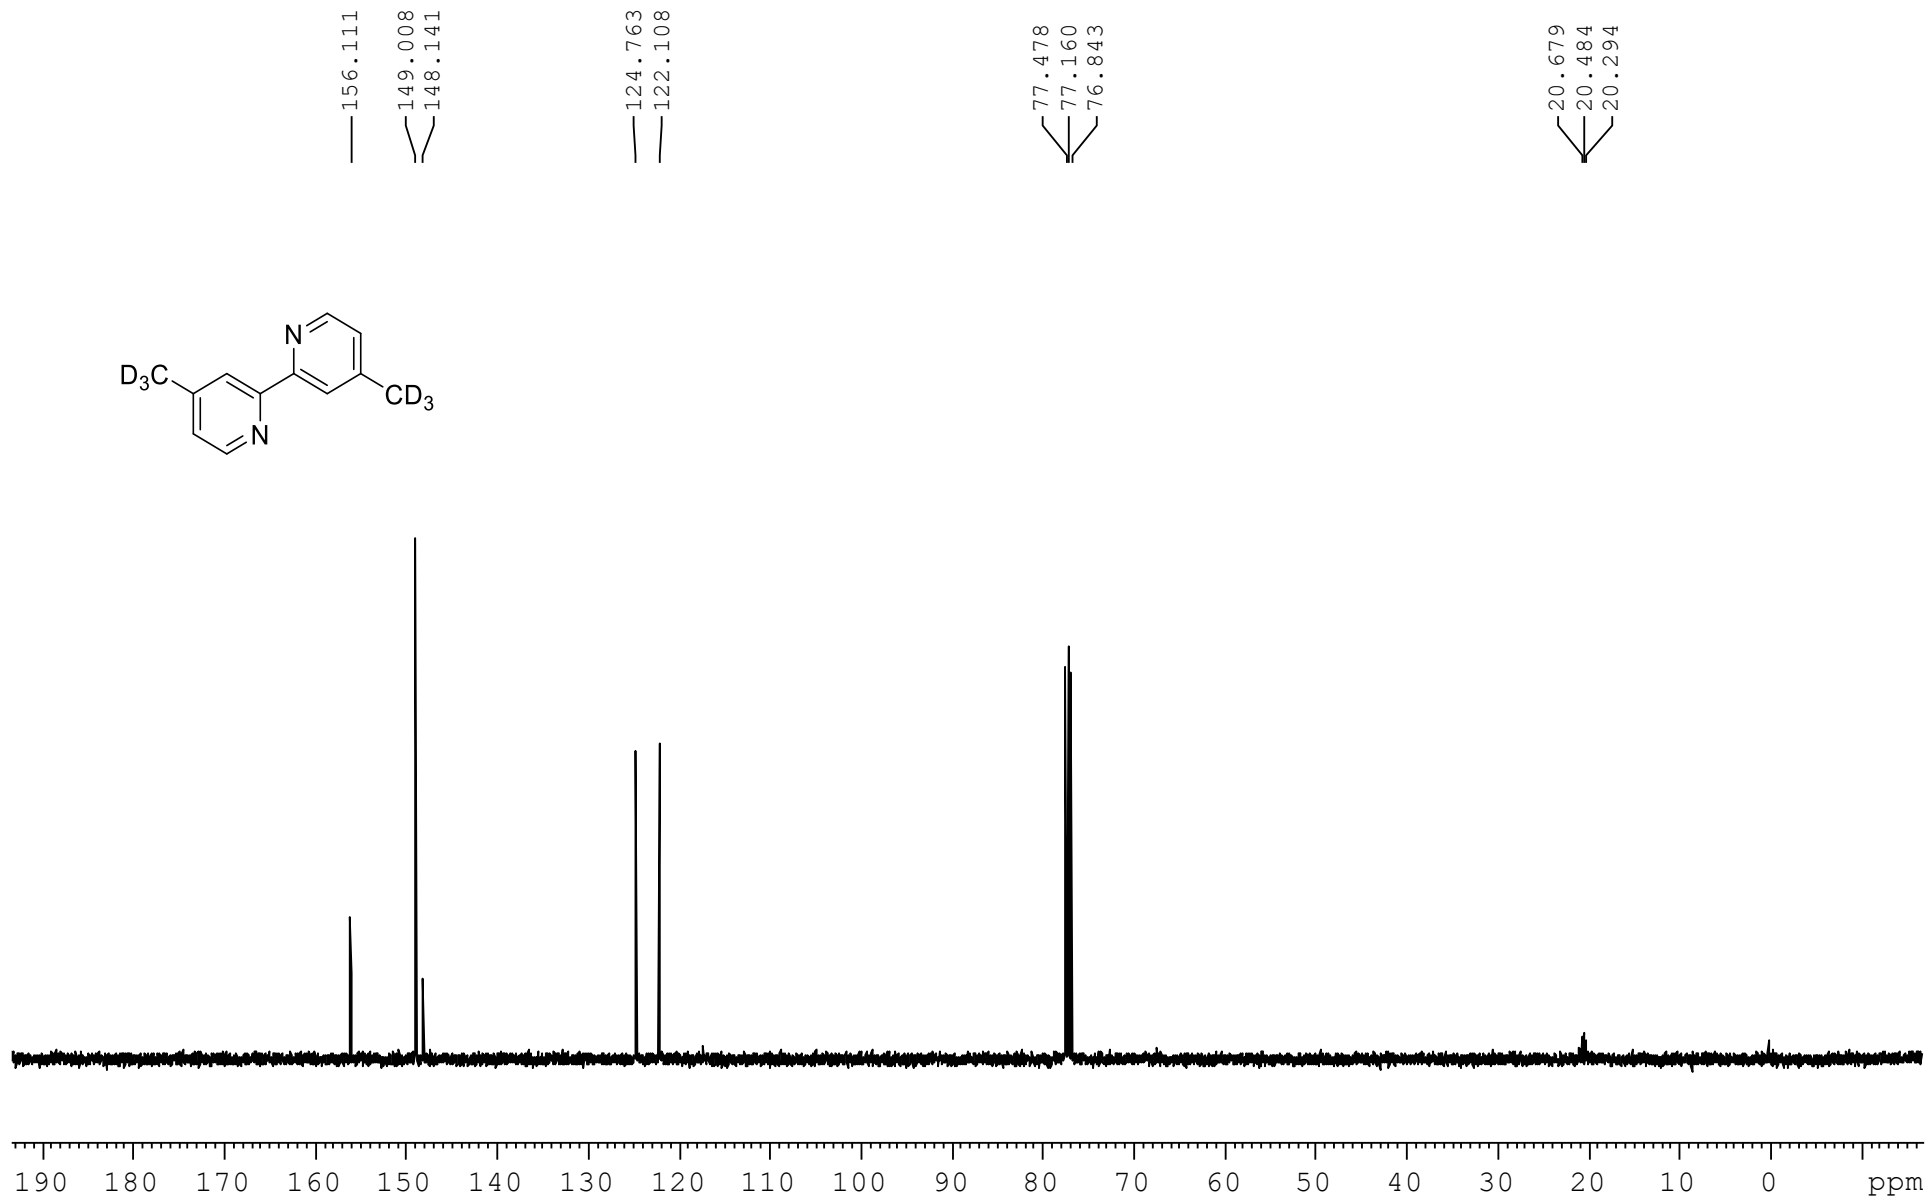

Figure S66. <sup>13</sup>C NMR spectra of **1u-d<sub>6</sub>** (CDCl<sub>3</sub>, 100 M)

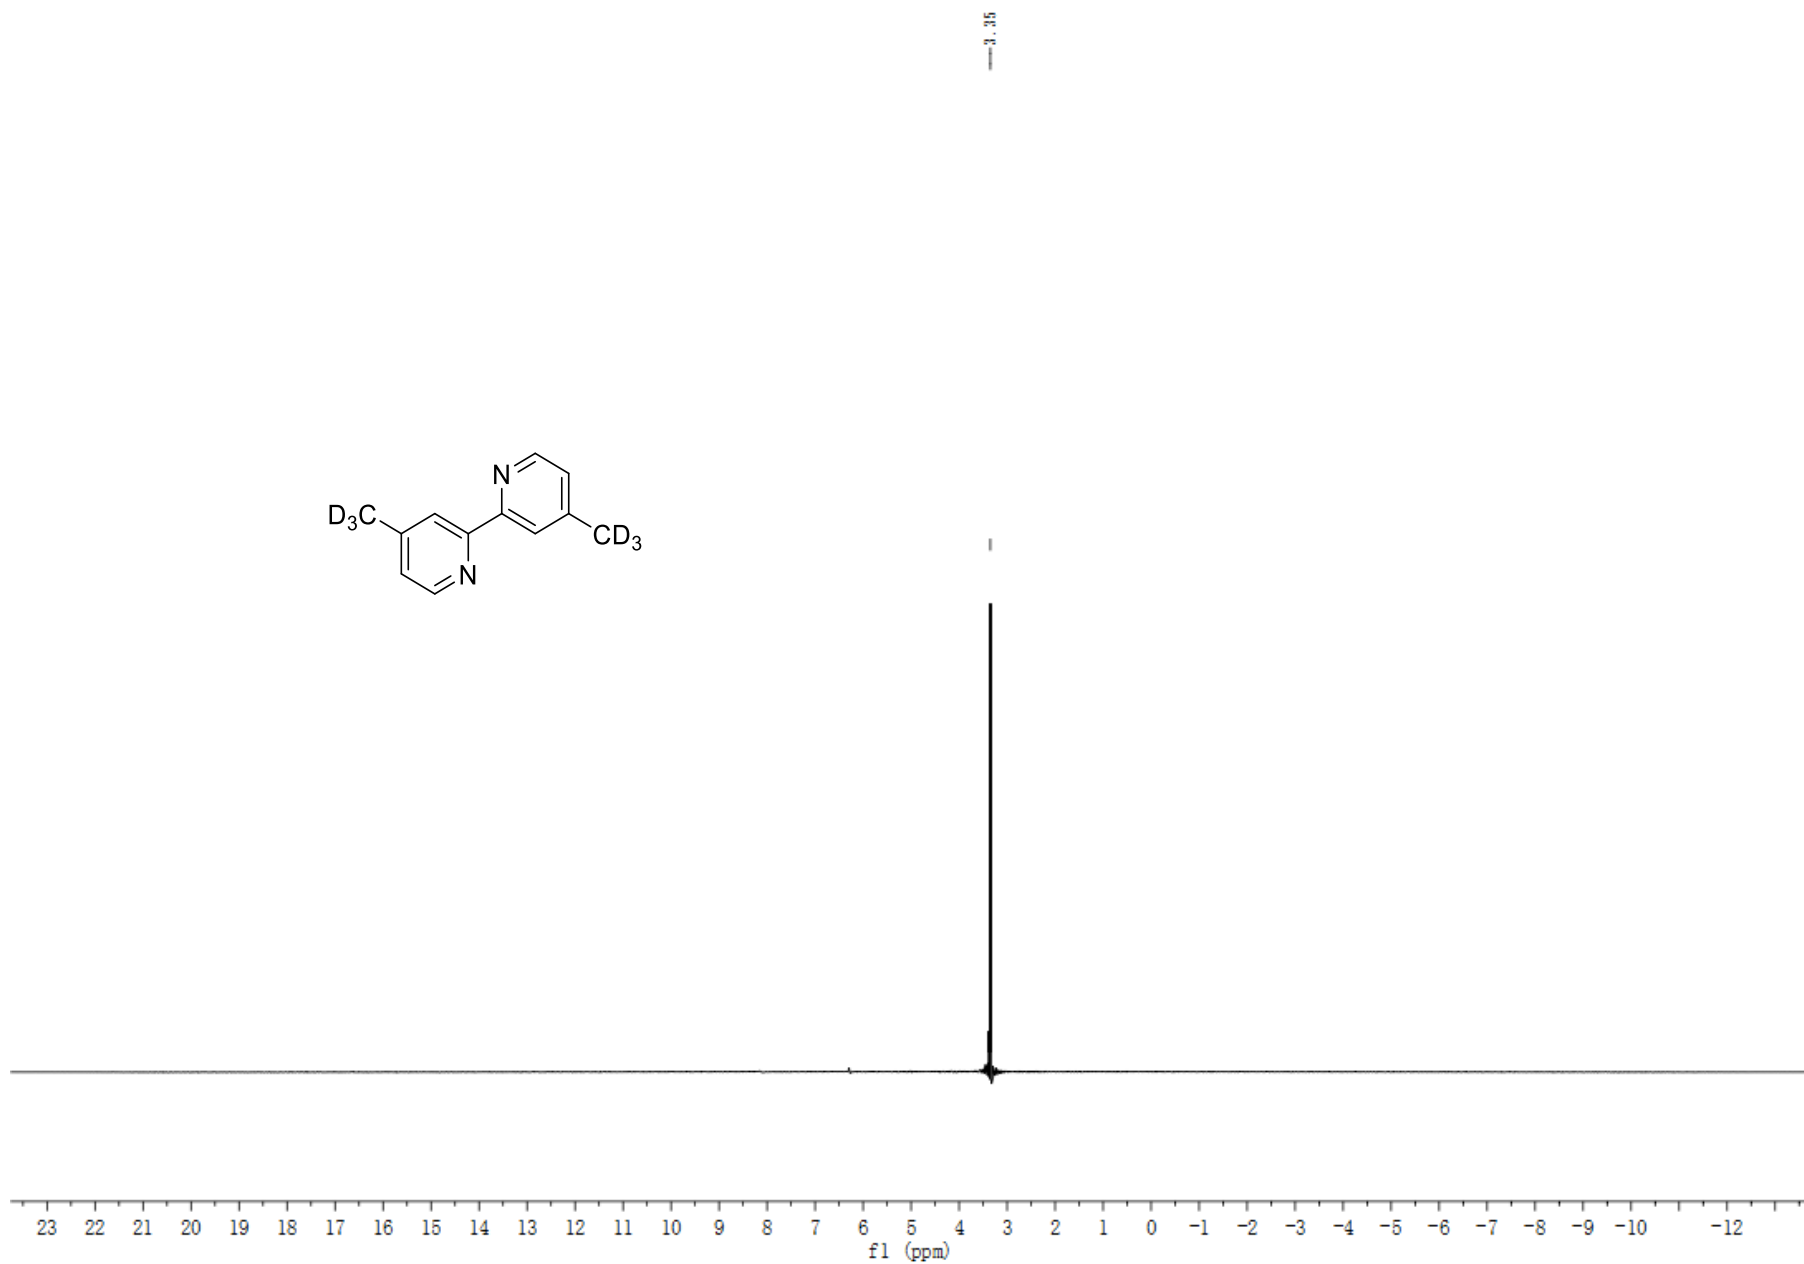

**Figure S67.**  $^2\text{H}$  NMR spectra of **1u-d<sub>6</sub>** ( $\text{DCM}$ , 92 M)

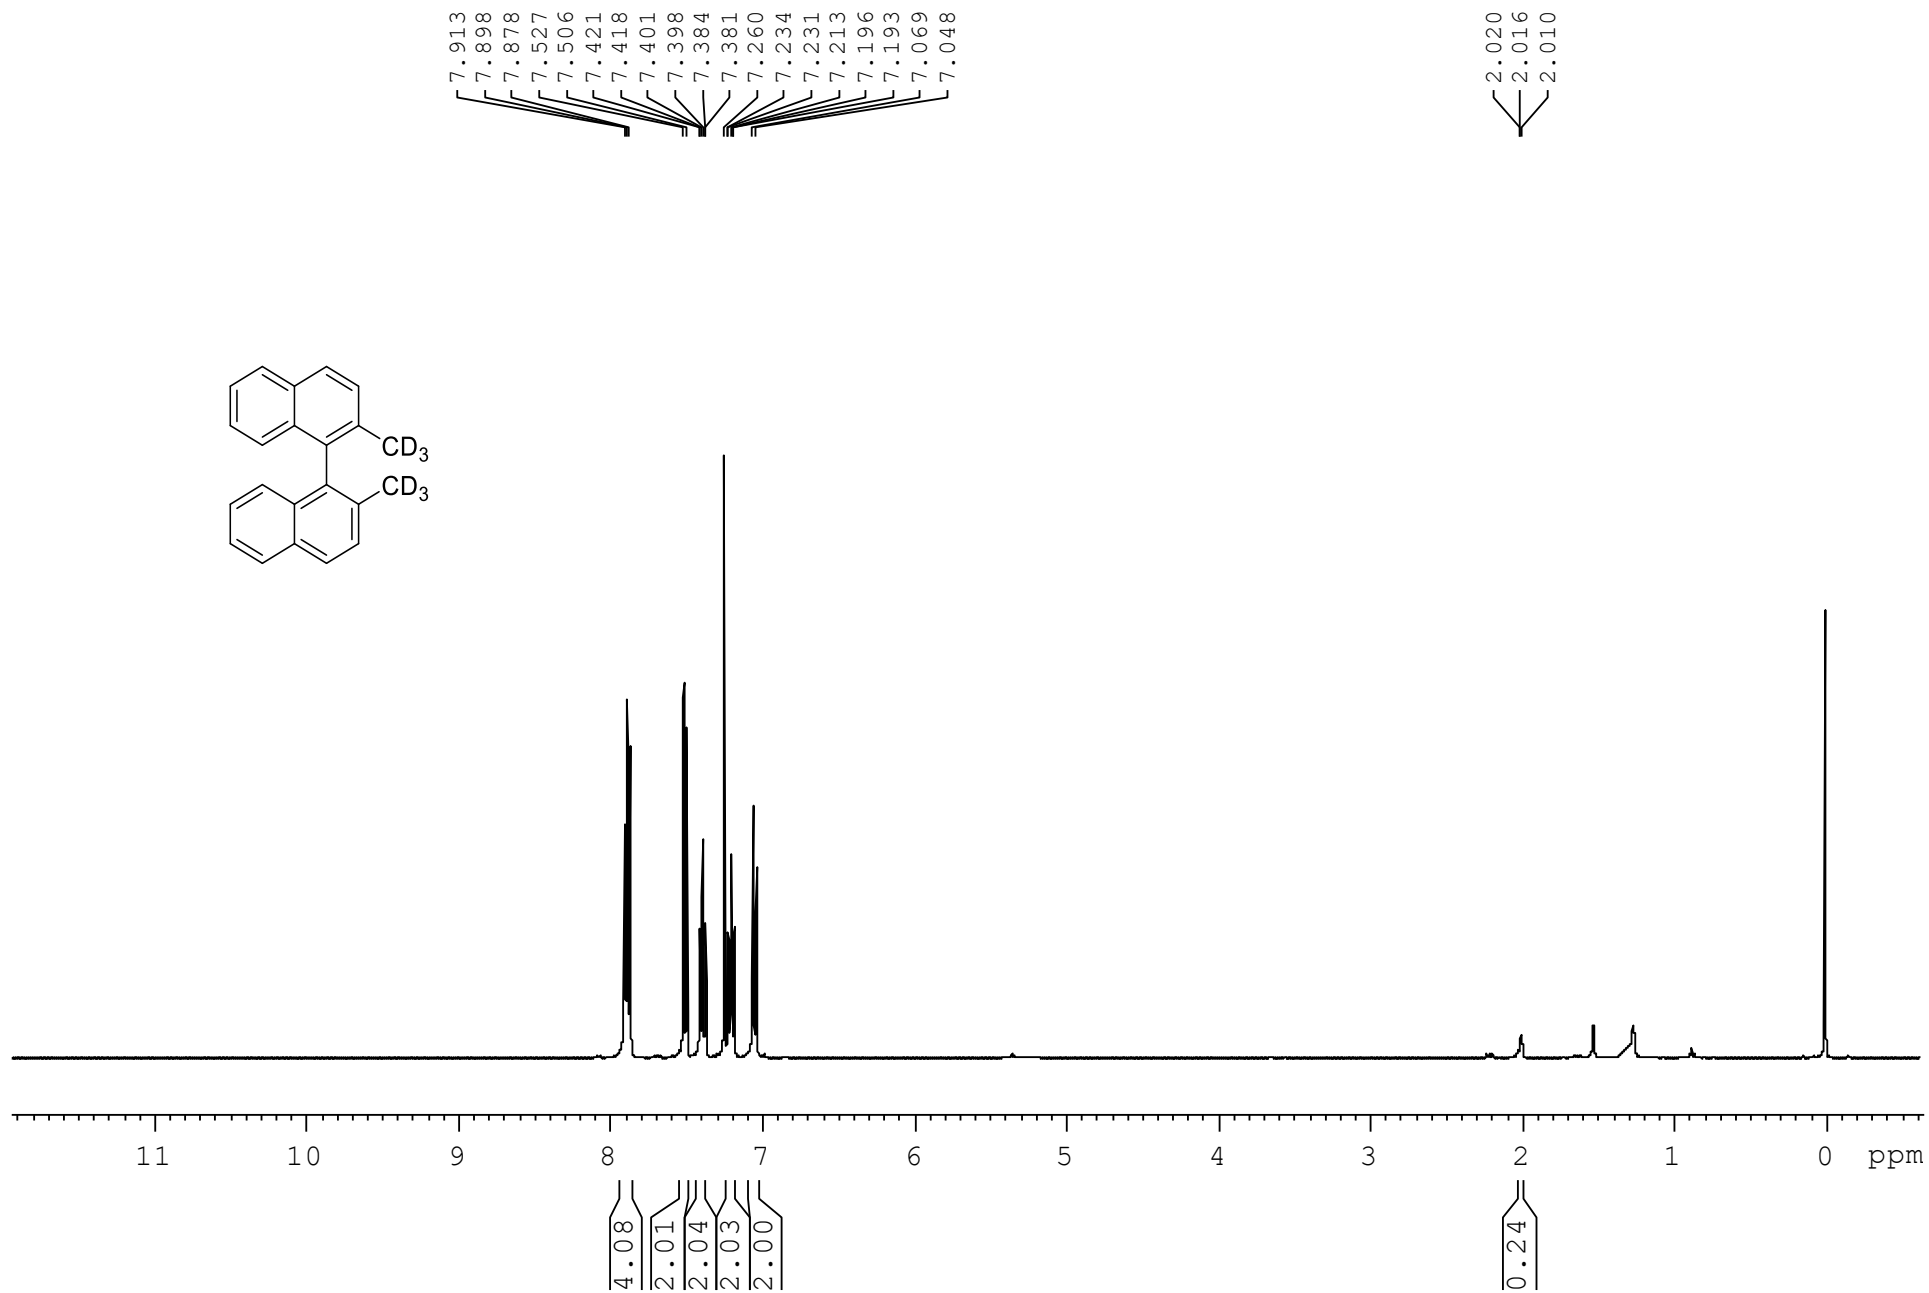

Figure S68. <sup>1</sup>H NMR spectra of **1v-d<sub>6</sub>** (CDCl<sub>3</sub>, 400 M)

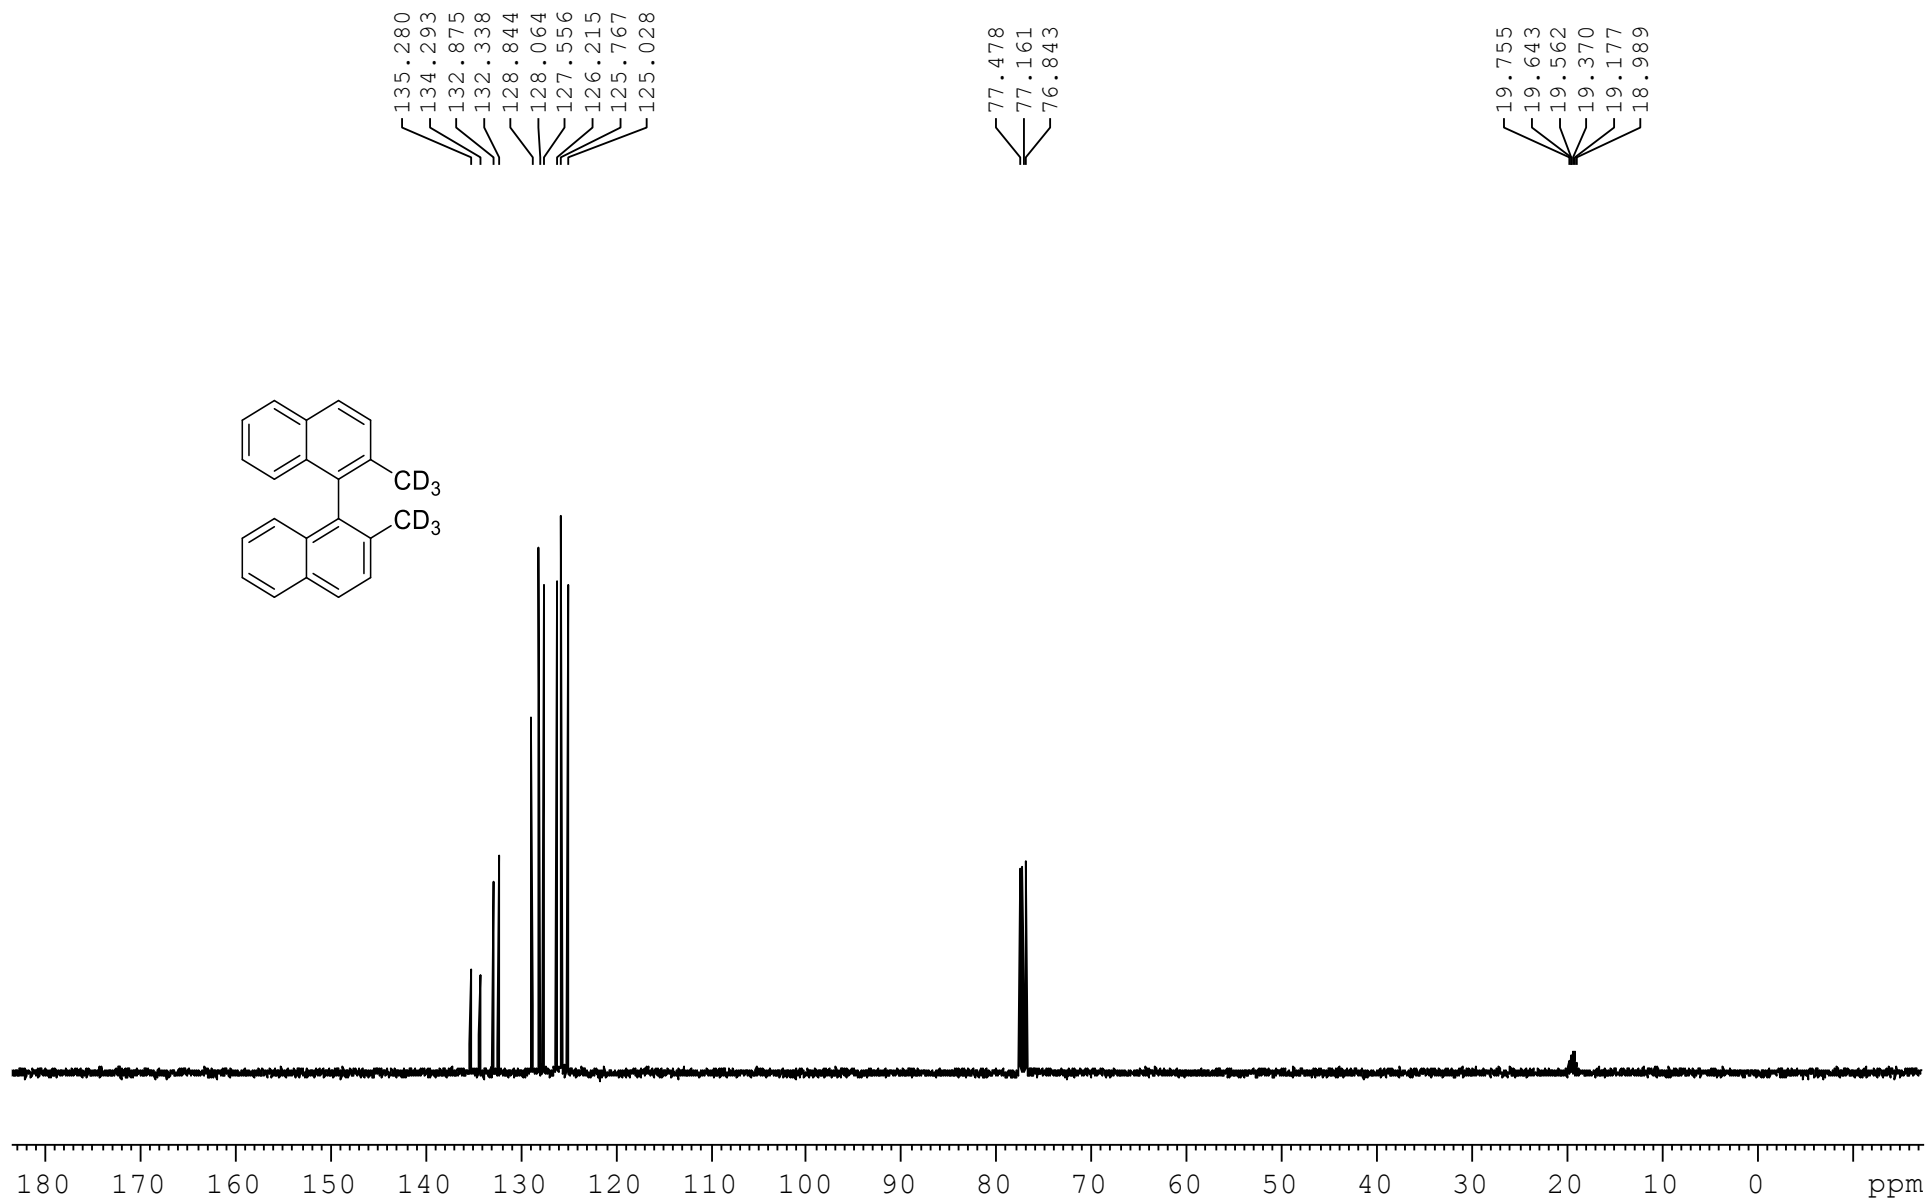

Figure S69.  $^{13}\text{C}$  NMR spectra of **1v-d<sub>6</sub>** ( $\text{CDCl}_3$ , 100 M)



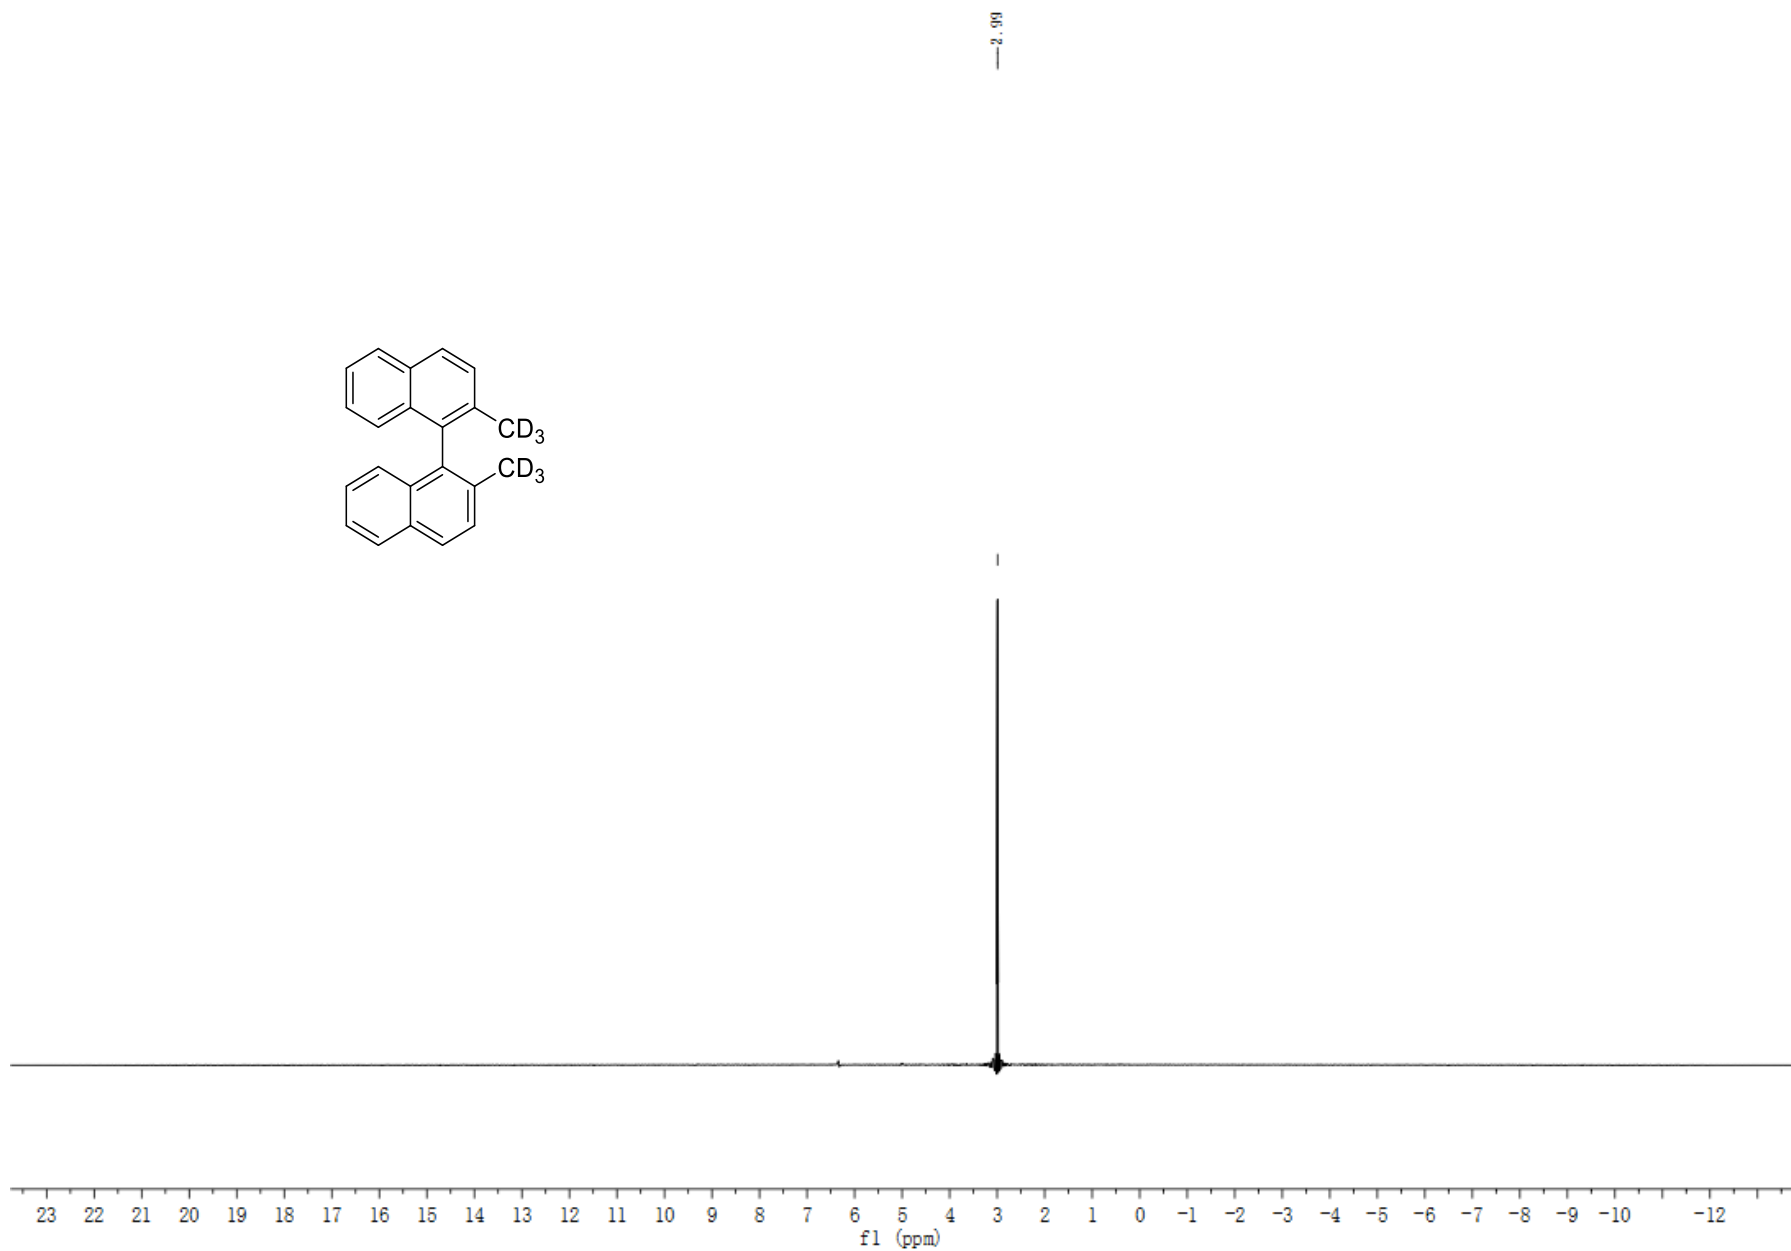

**Figure S70.**  $^2\text{H}$  NMR spectra of **1v-d<sub>6</sub>** ( $\text{DCM}$ , 92 M)

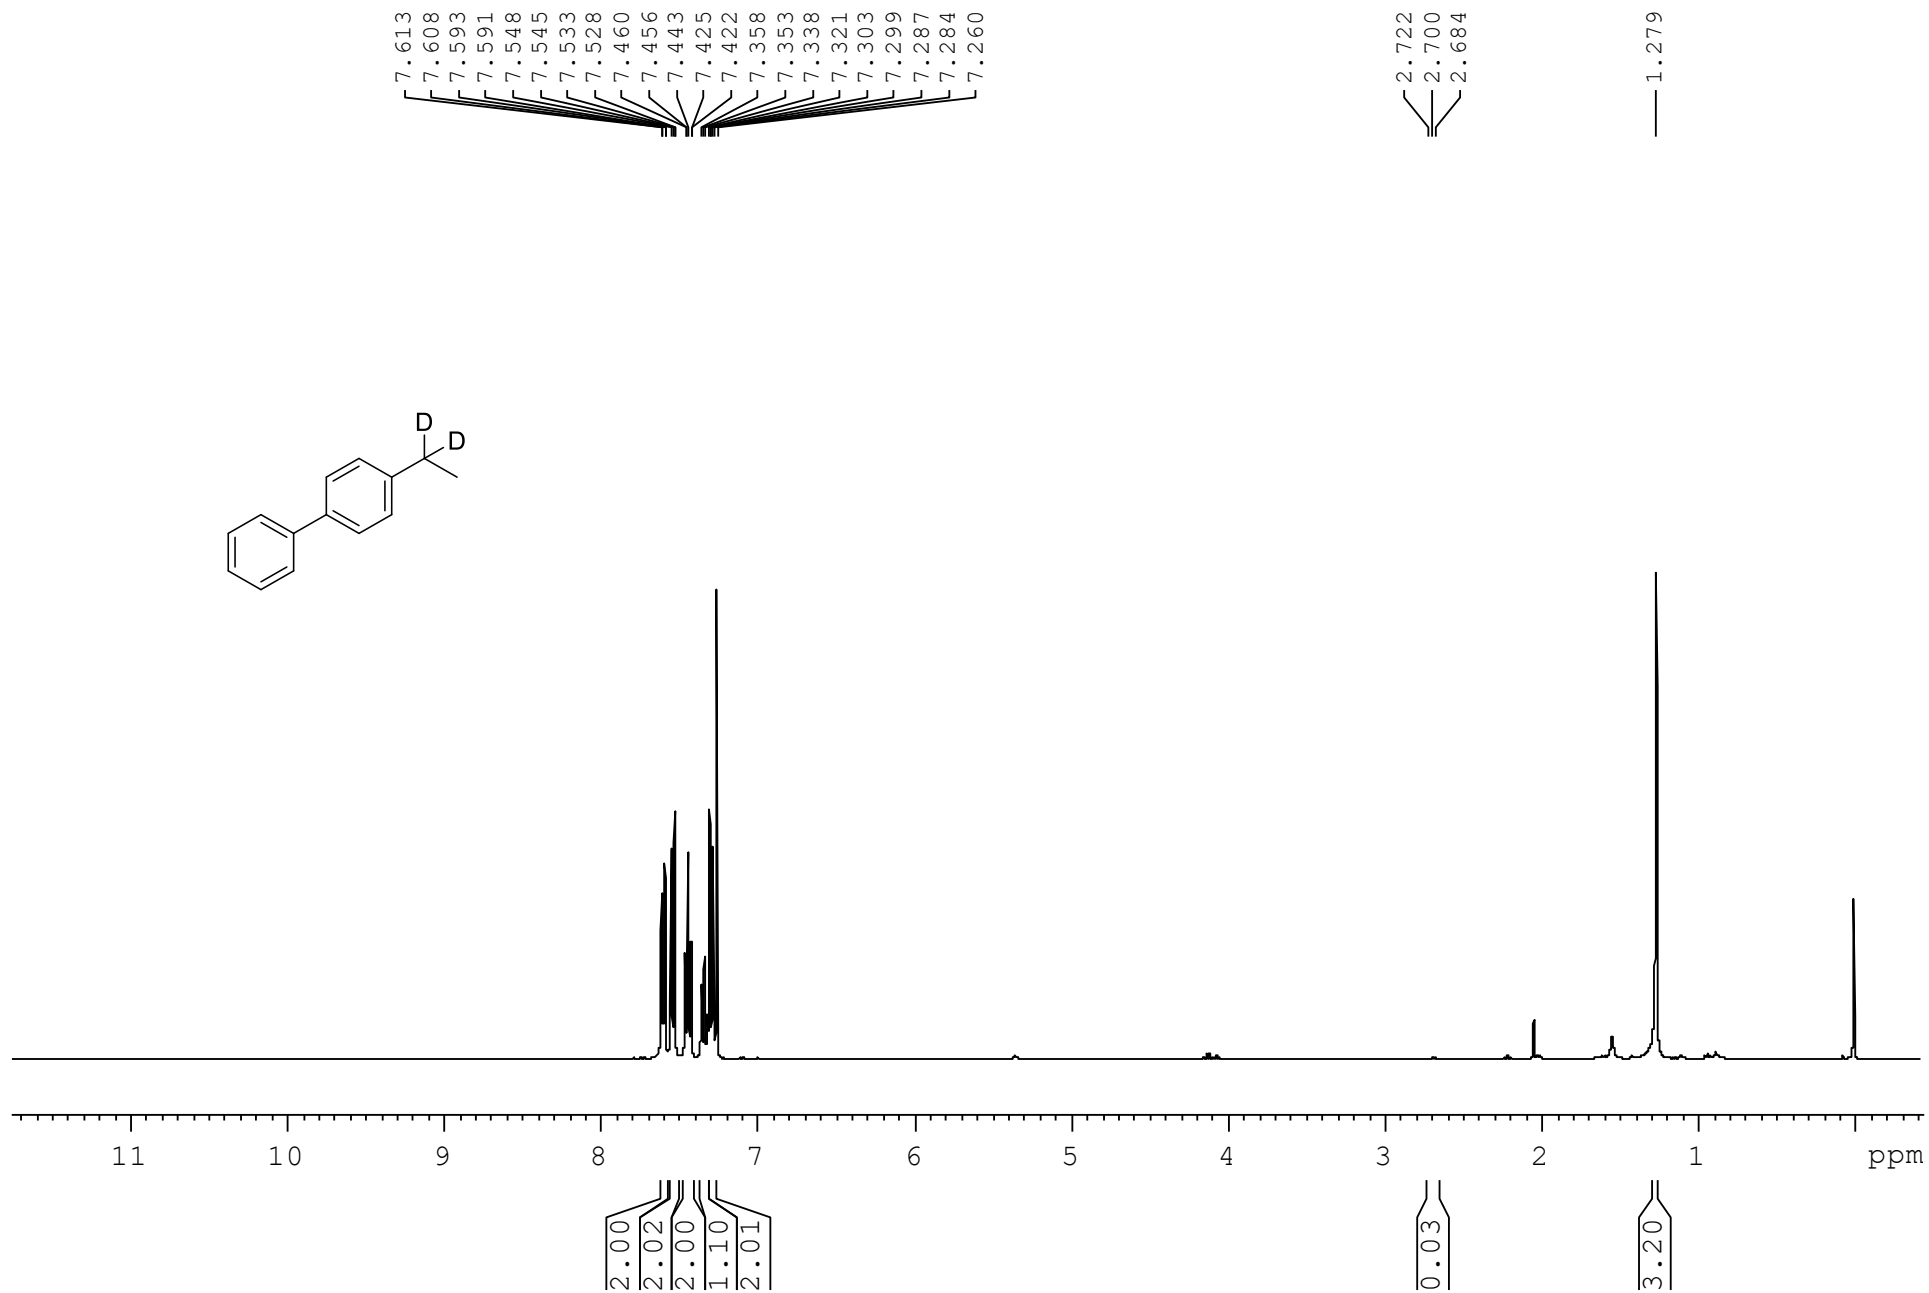

Figure S71. <sup>1</sup>H NMR spectra of 1w-d<sub>2</sub> (CDCl<sub>3</sub>, 400 M)

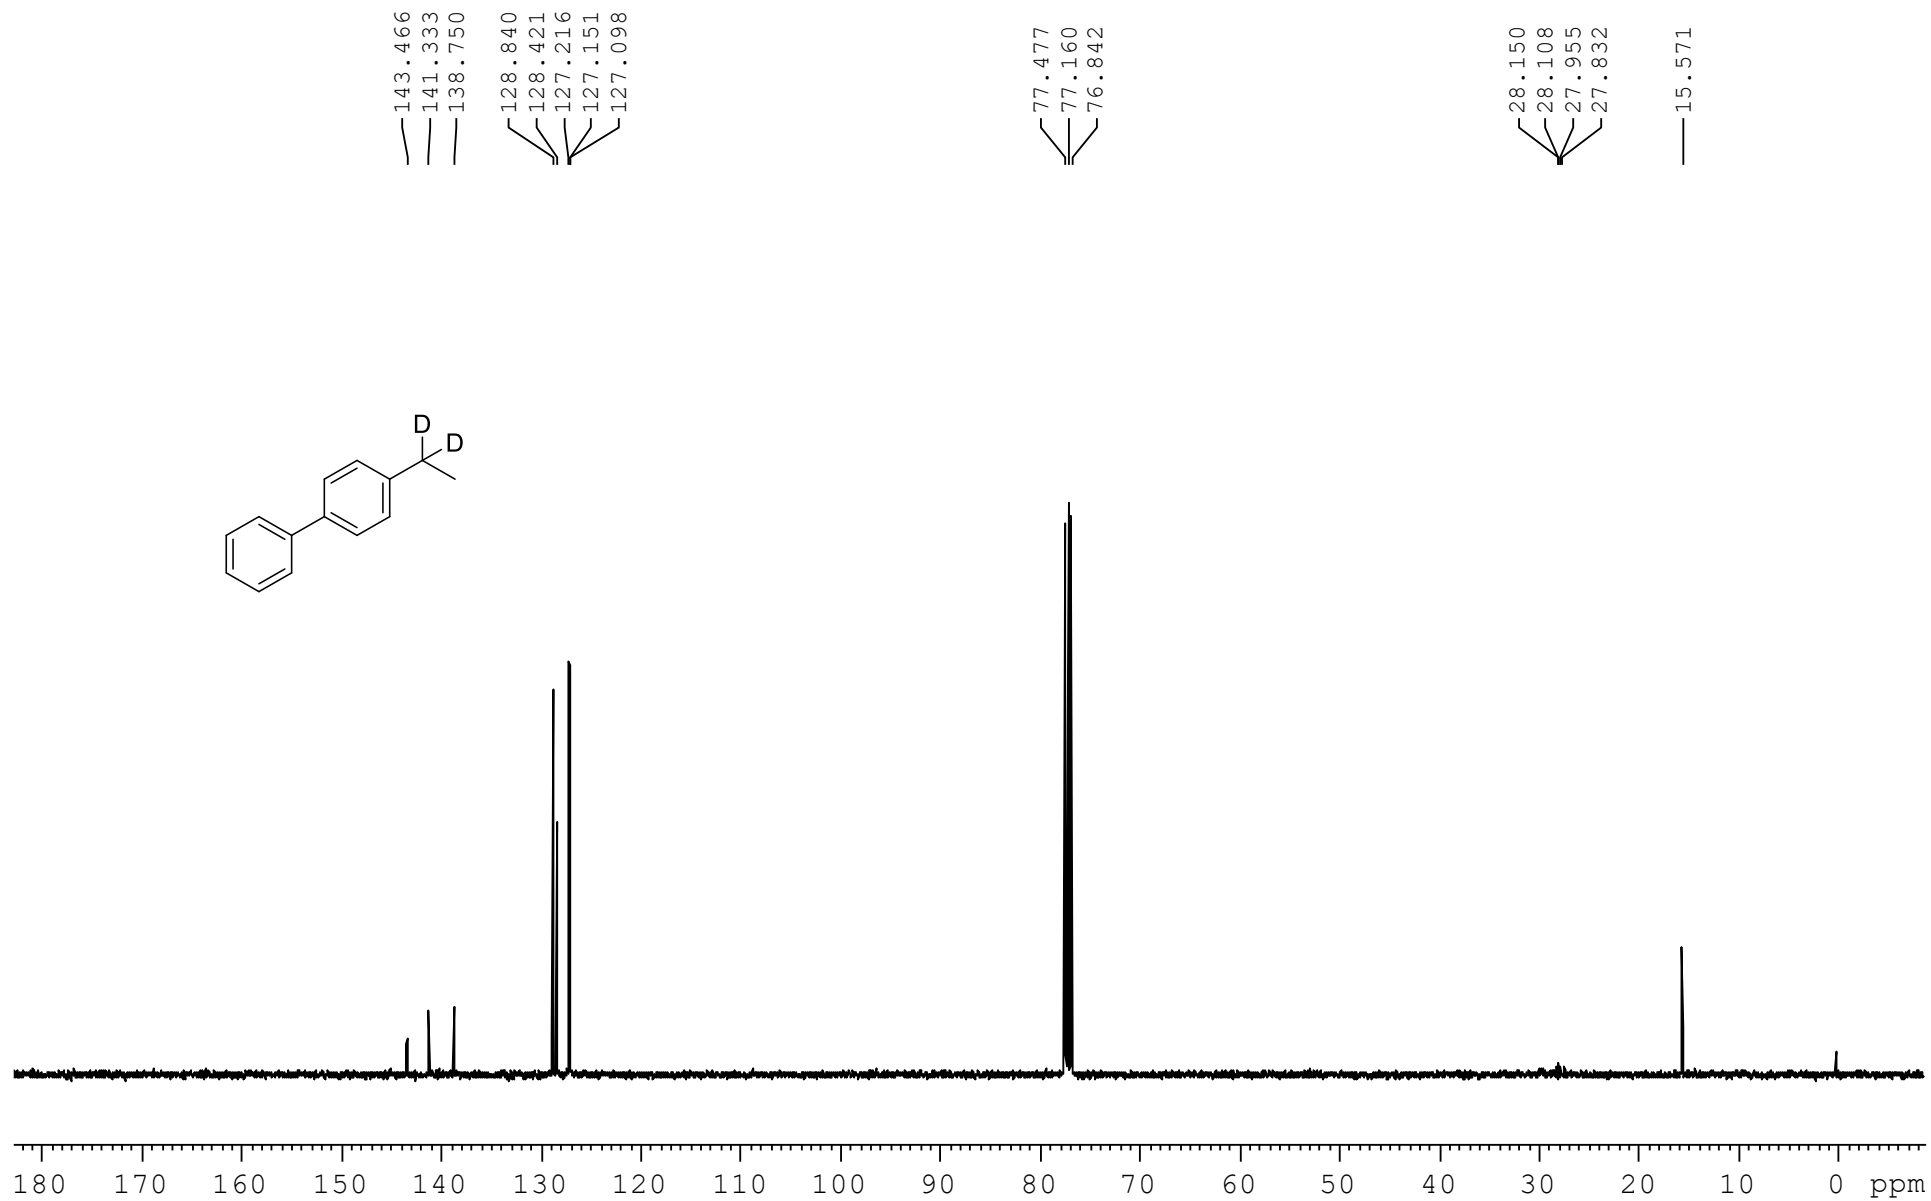

Figure S72. <sup>13</sup>C NMR spectra of **1w-d<sub>2</sub>** (CDCl<sub>3</sub>, 100 M)

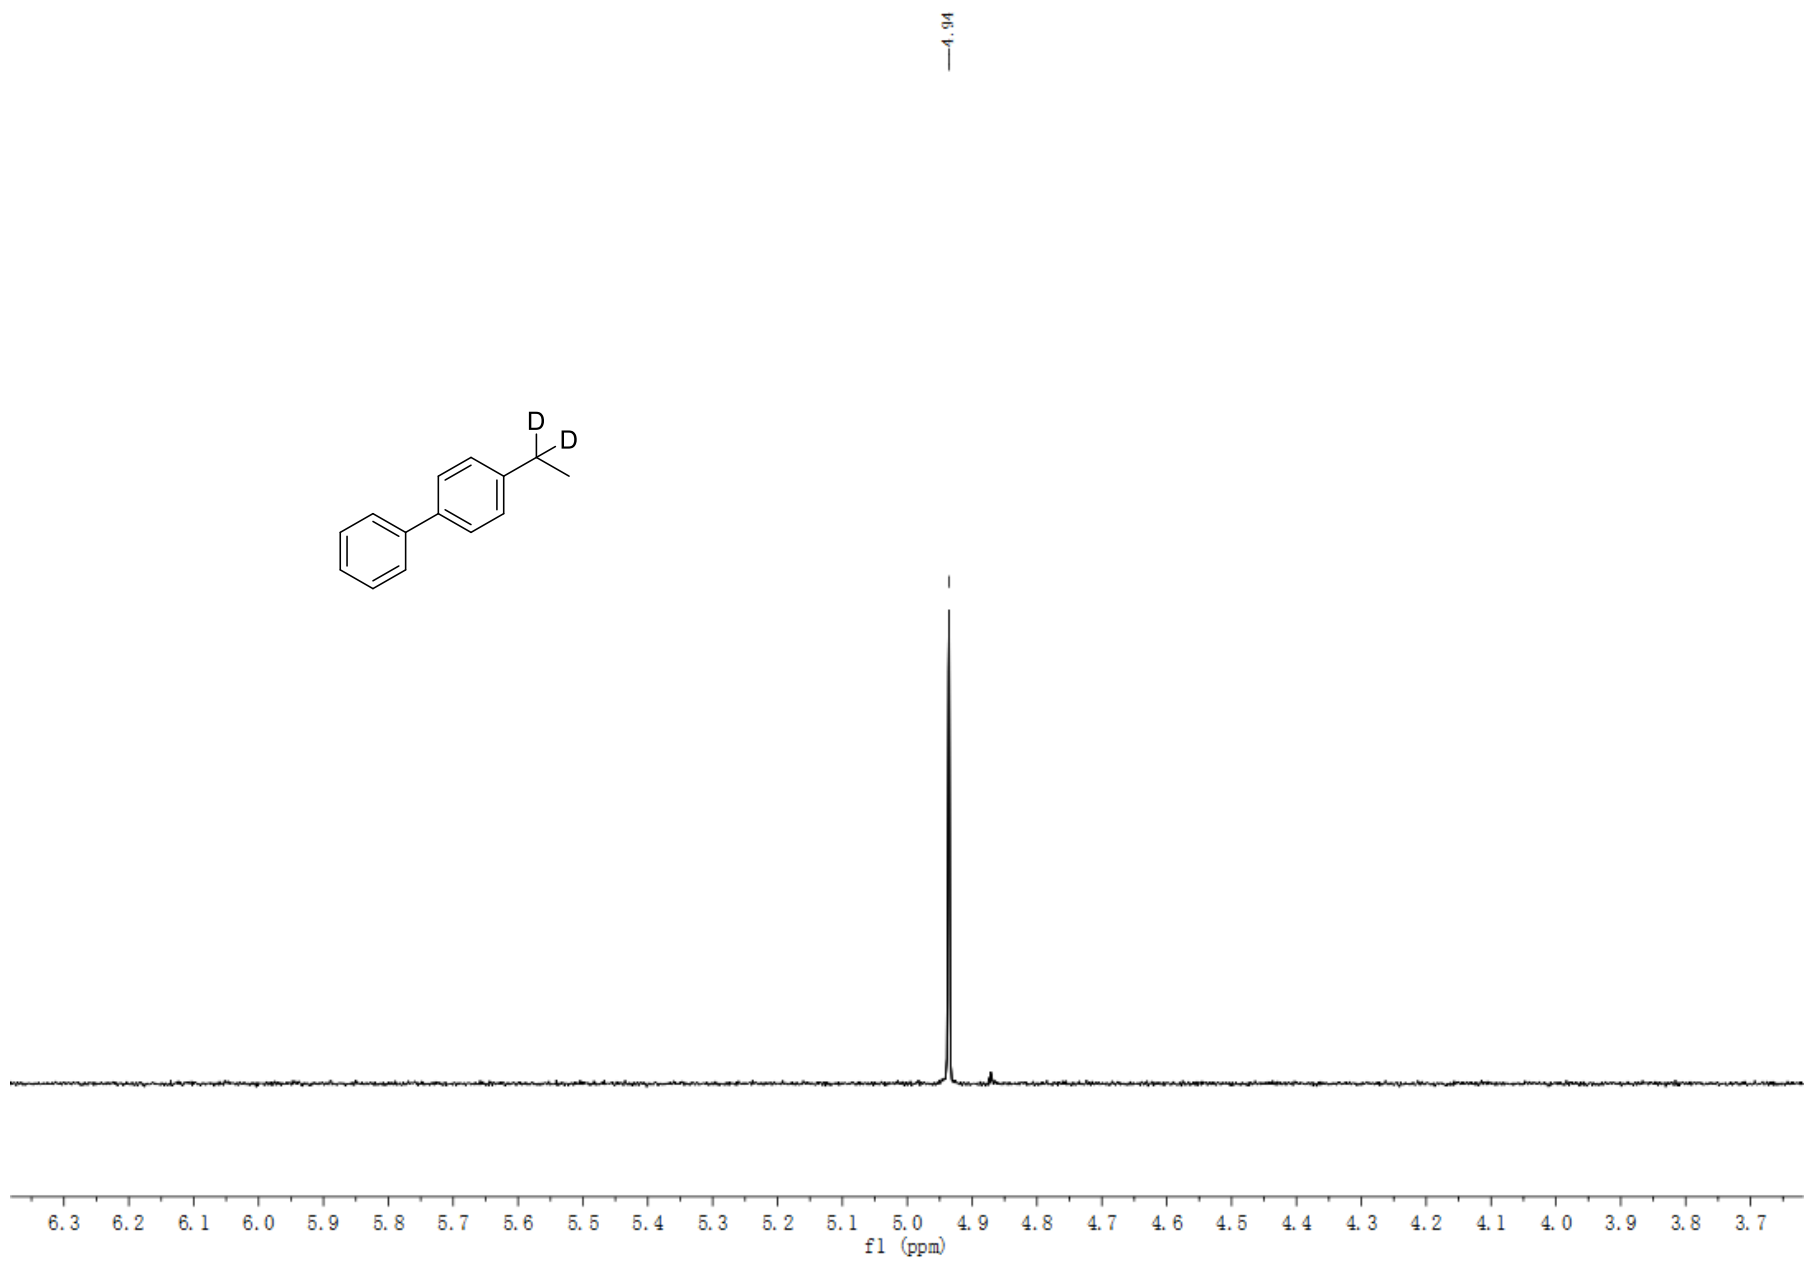

**Figure S73.**  $^2\text{H}$  NMR spectra of **1w-d<sub>2</sub>** ( $\text{MeCN}$ , 92 M)

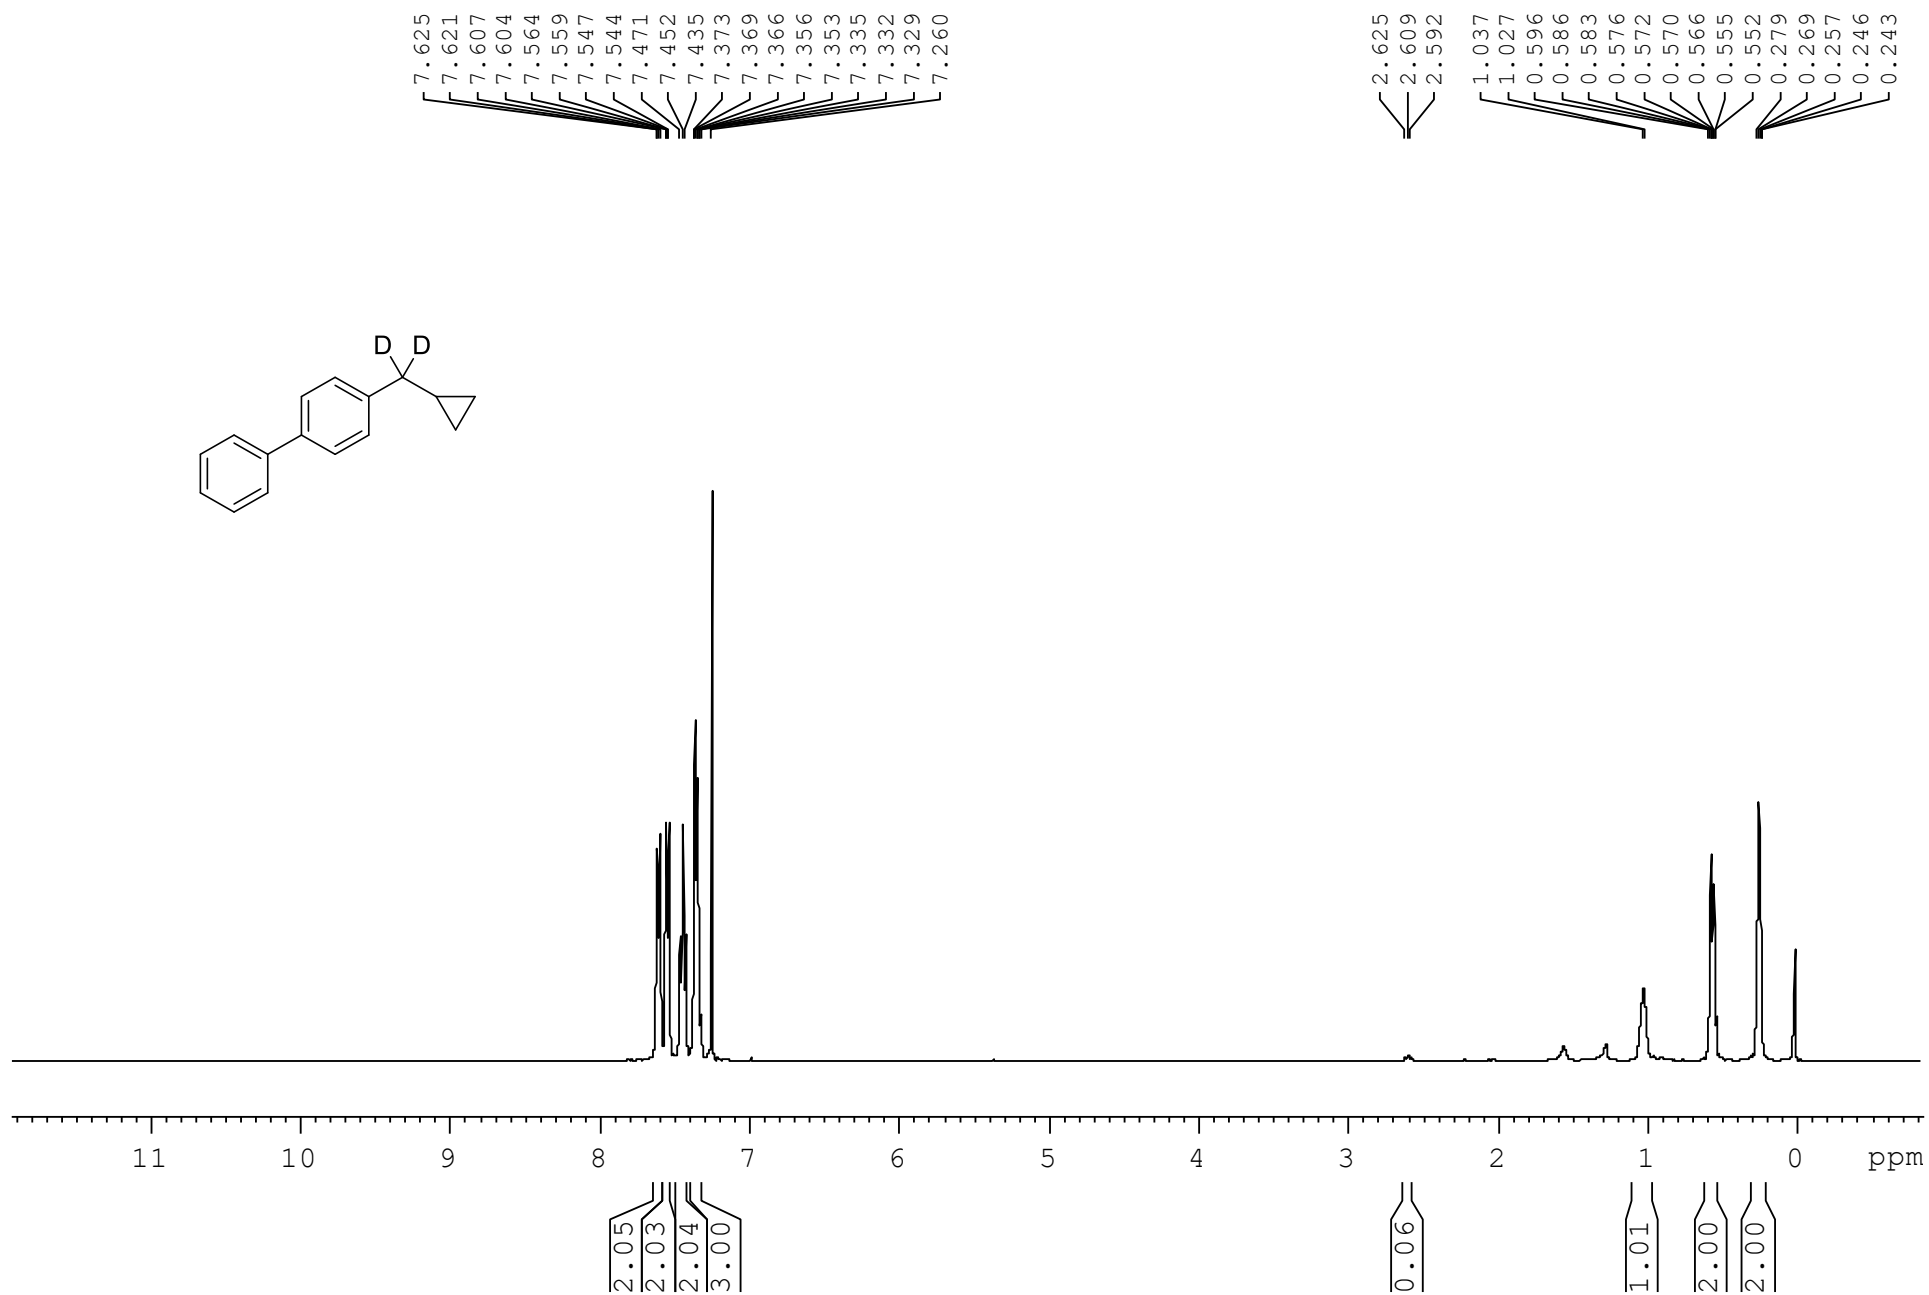

Figure S74. <sup>1</sup>H NMR spectra of 1x-d<sub>2</sub> (CDCl<sub>3</sub>, 400 M)

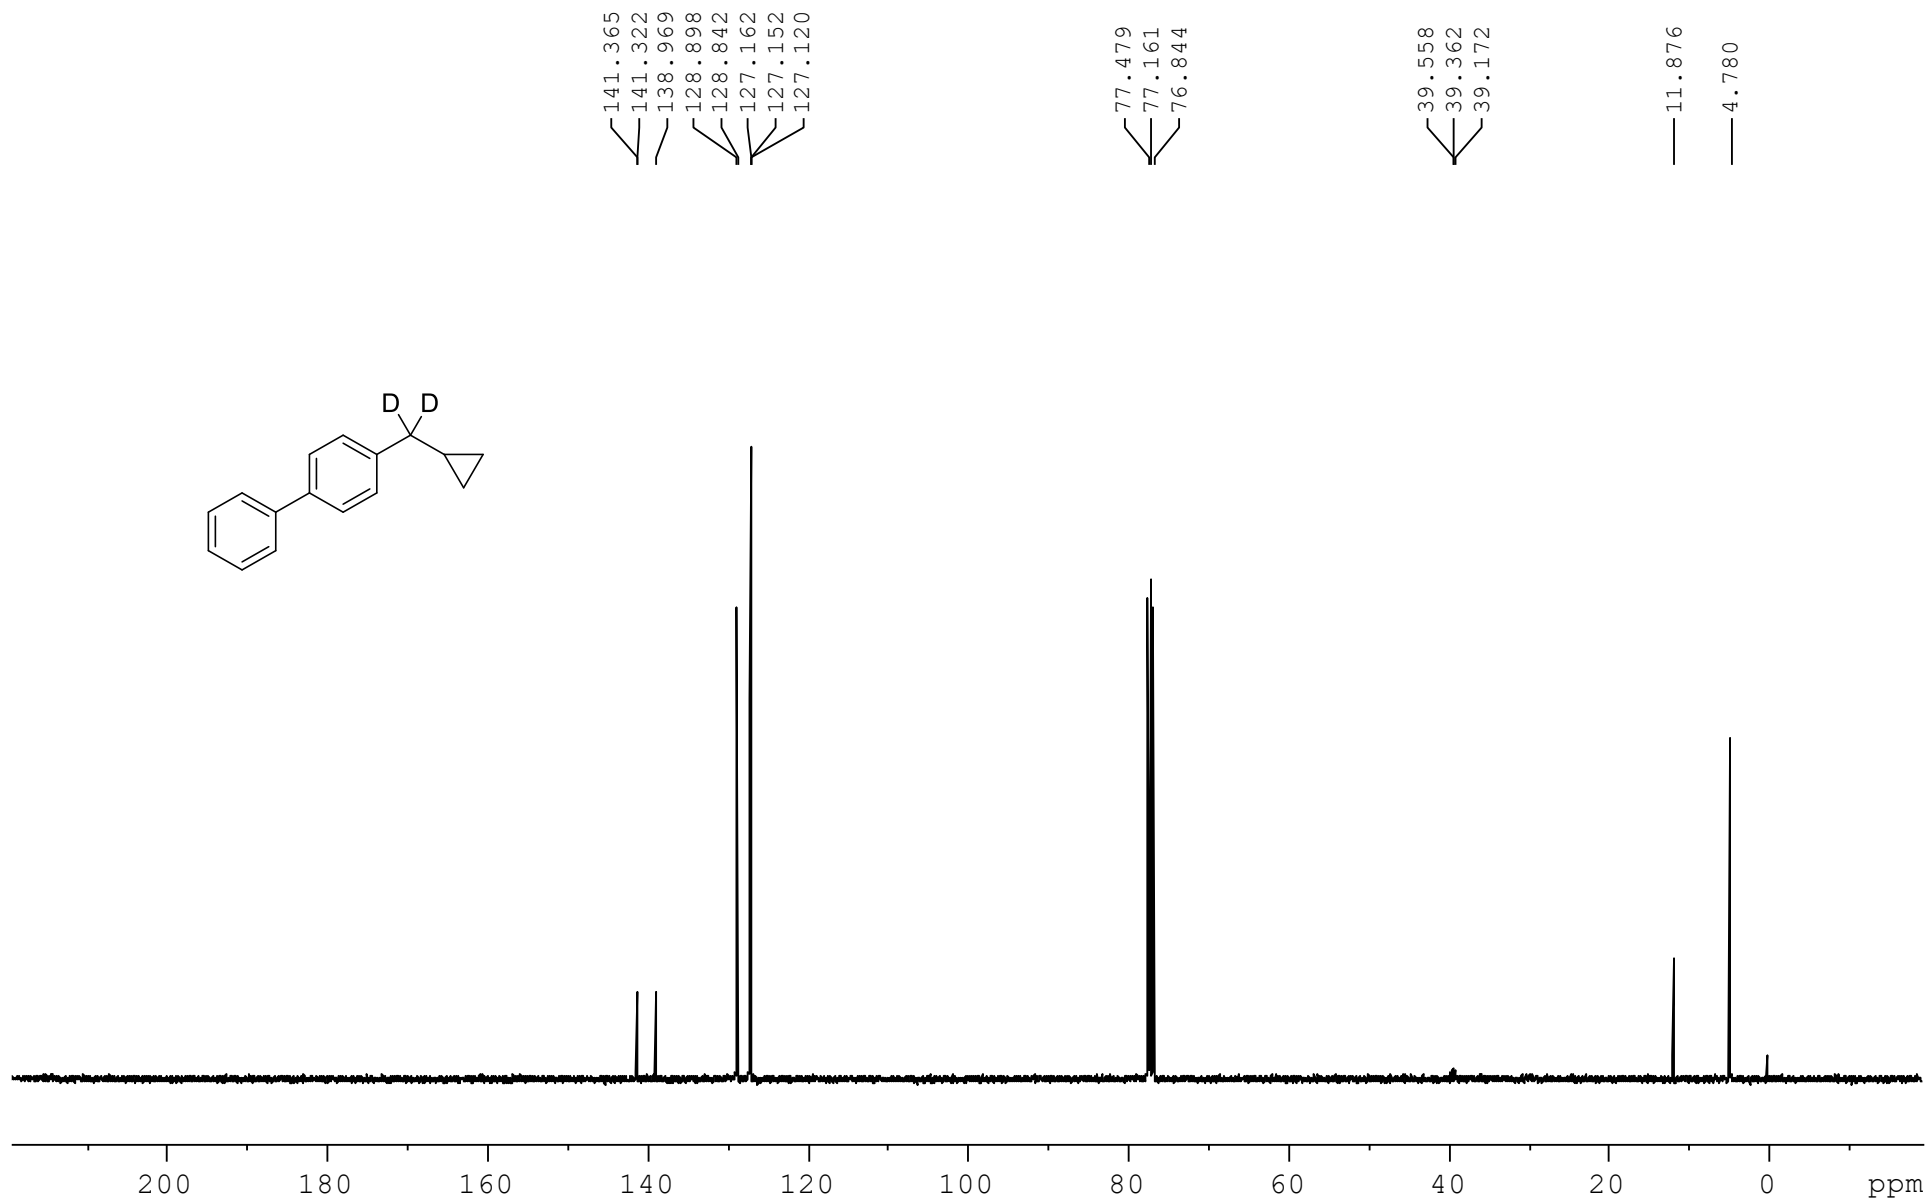

Figure S75.  $^{13}\text{C}$  NMR spectra of **1x-d<sub>2</sub>** ( $\text{CDCl}_3$ , 100 M)

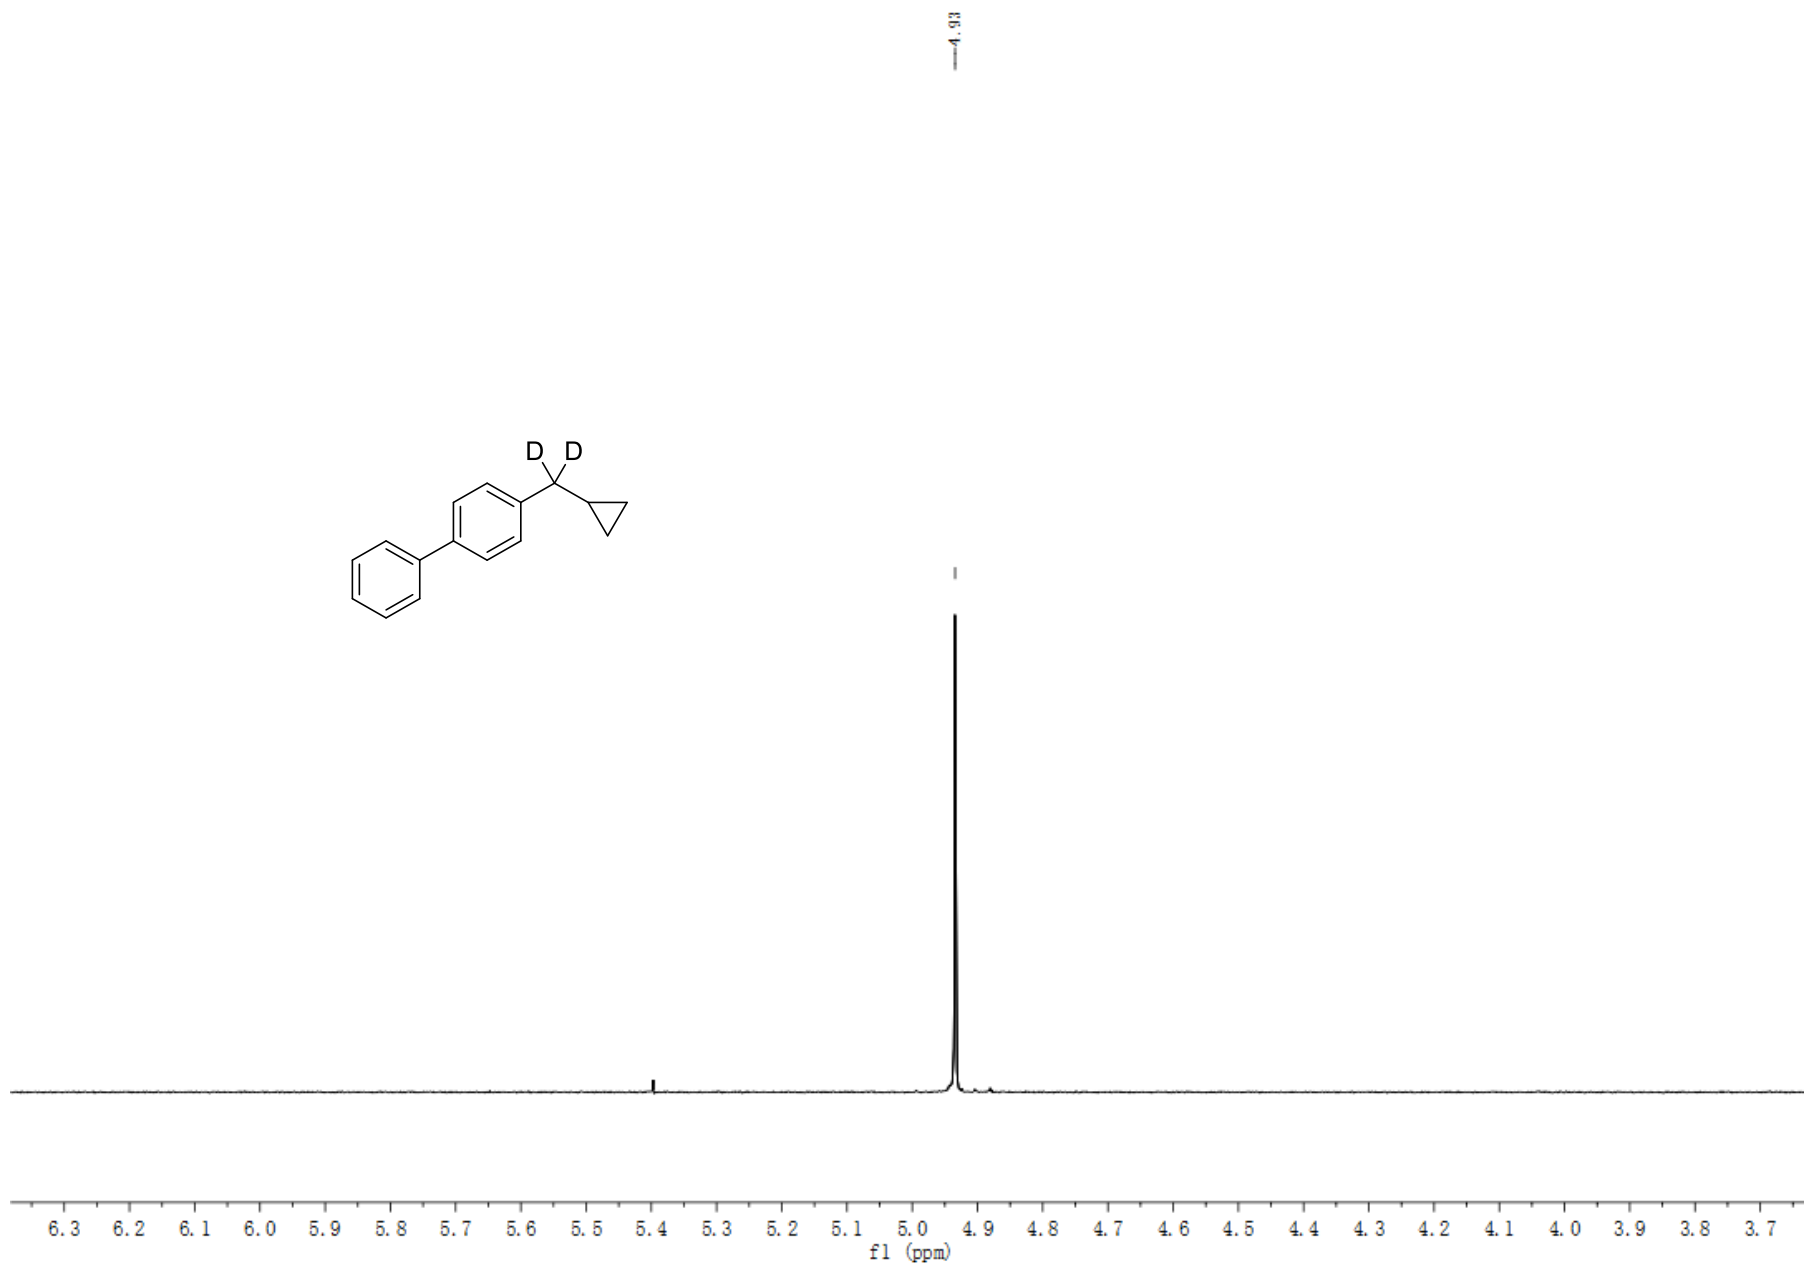

**Figure S76.**  $^2\text{H}$  NMR spectra of **1x-d<sub>2</sub>** ( $\text{MeCN}$ , 92 M)

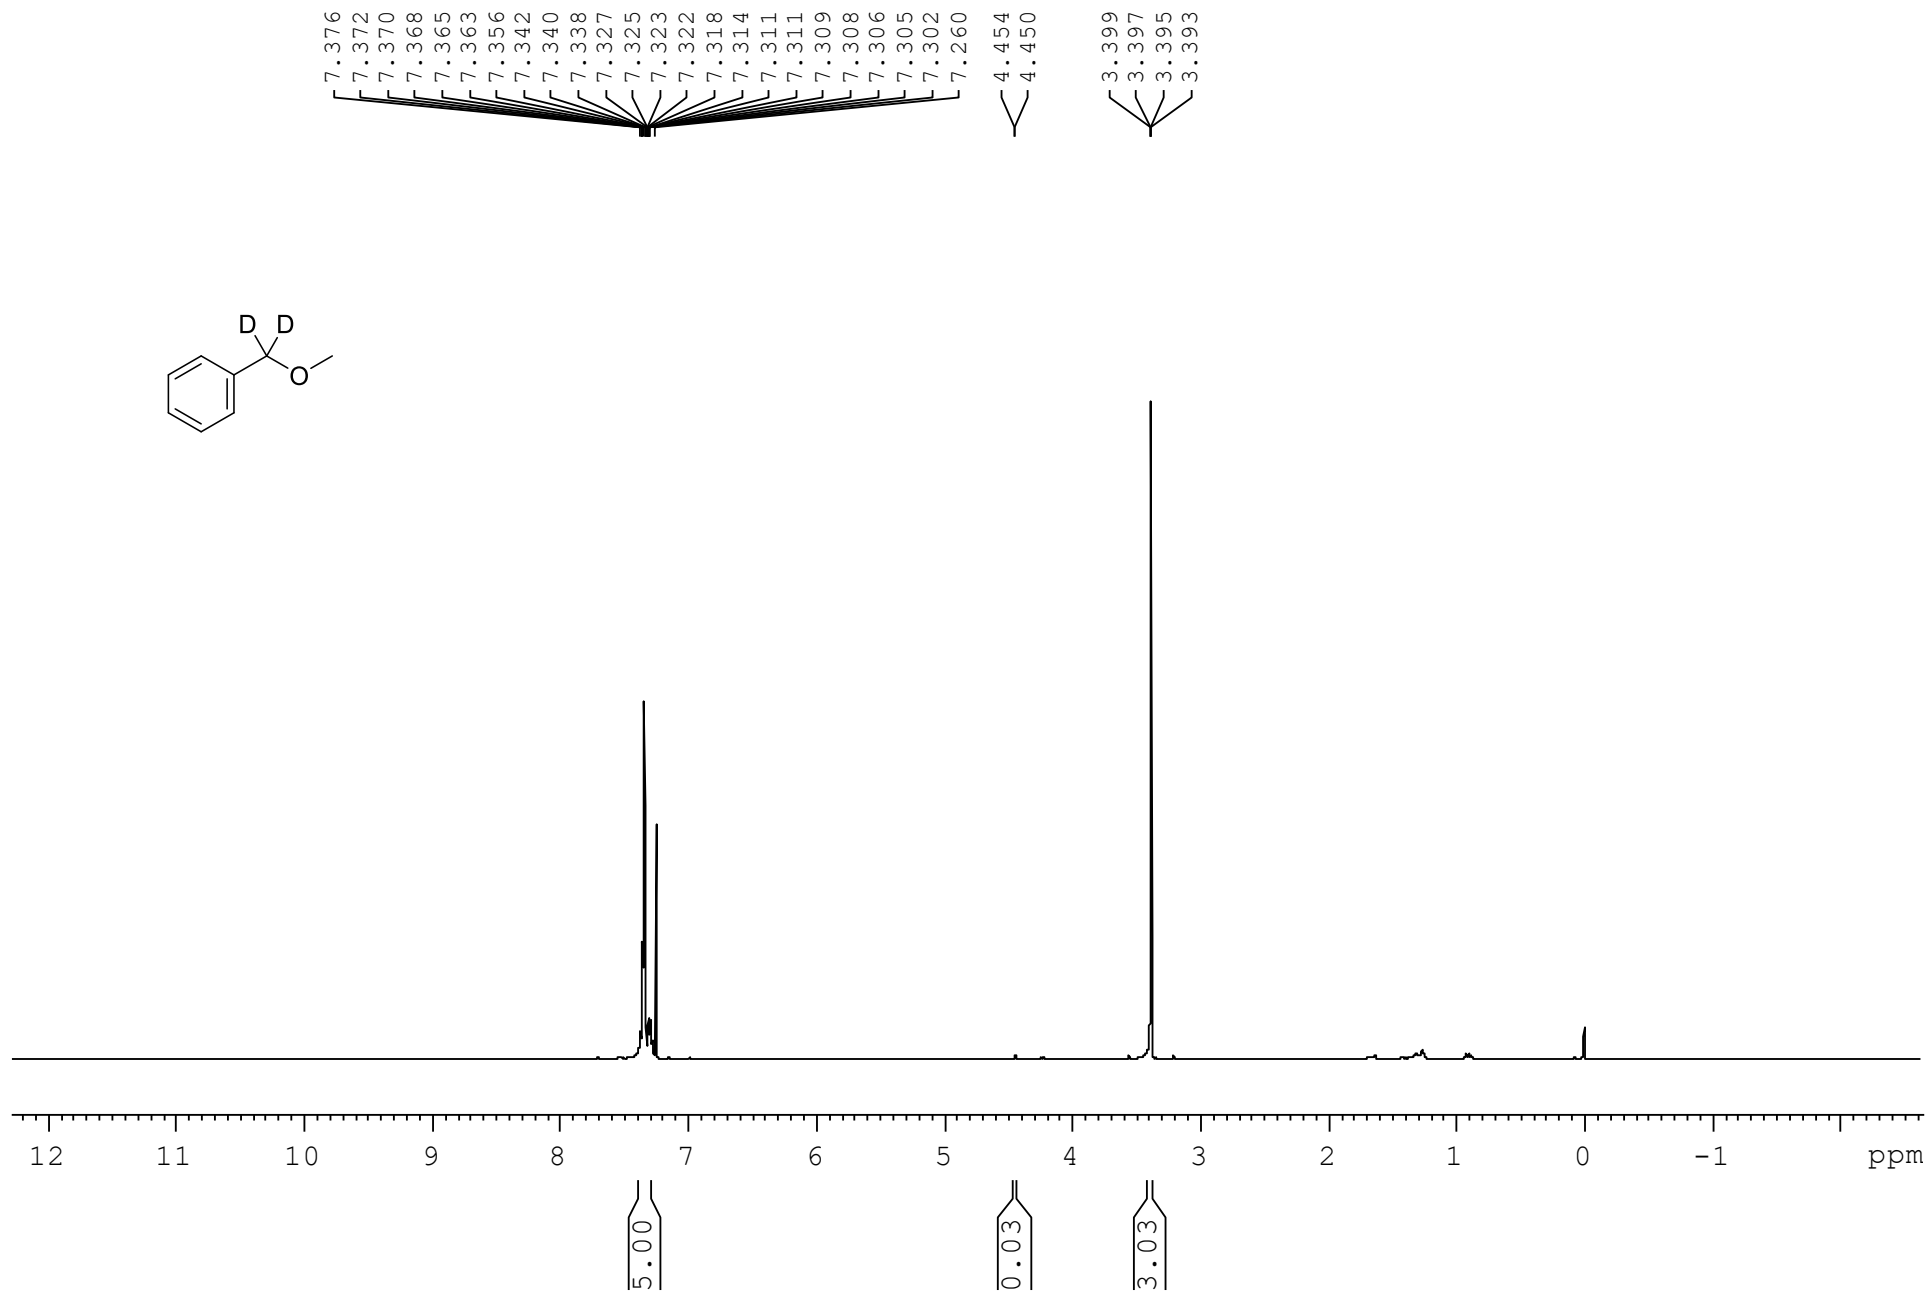

Figure S77. <sup>1</sup>H NMR spectra of 1y-d<sub>2</sub> (CDCl<sub>3</sub>, 400 M)



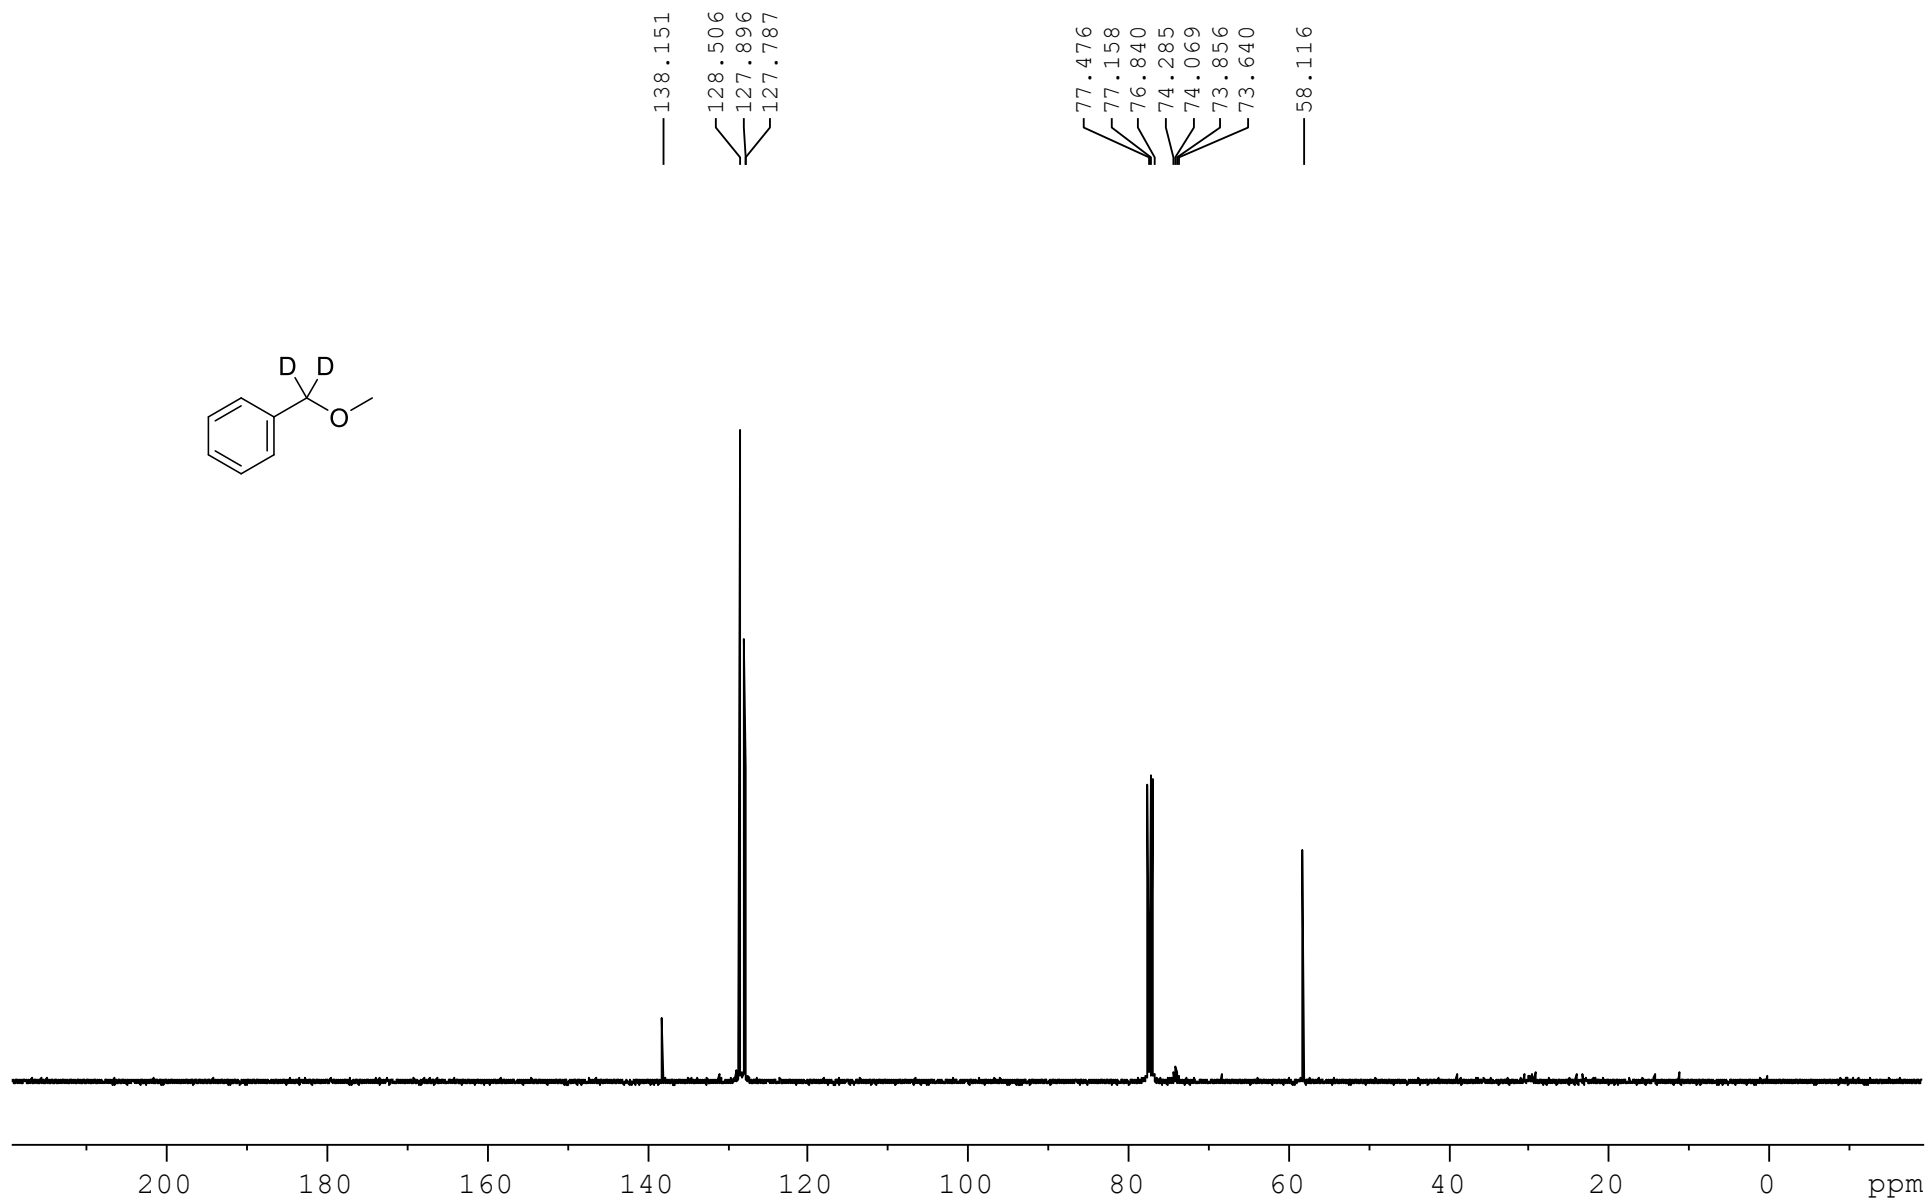

Figure S78. <sup>13</sup>C NMR spectra of **1y-d<sub>2</sub>** (CDCl<sub>3</sub>, 100 M)

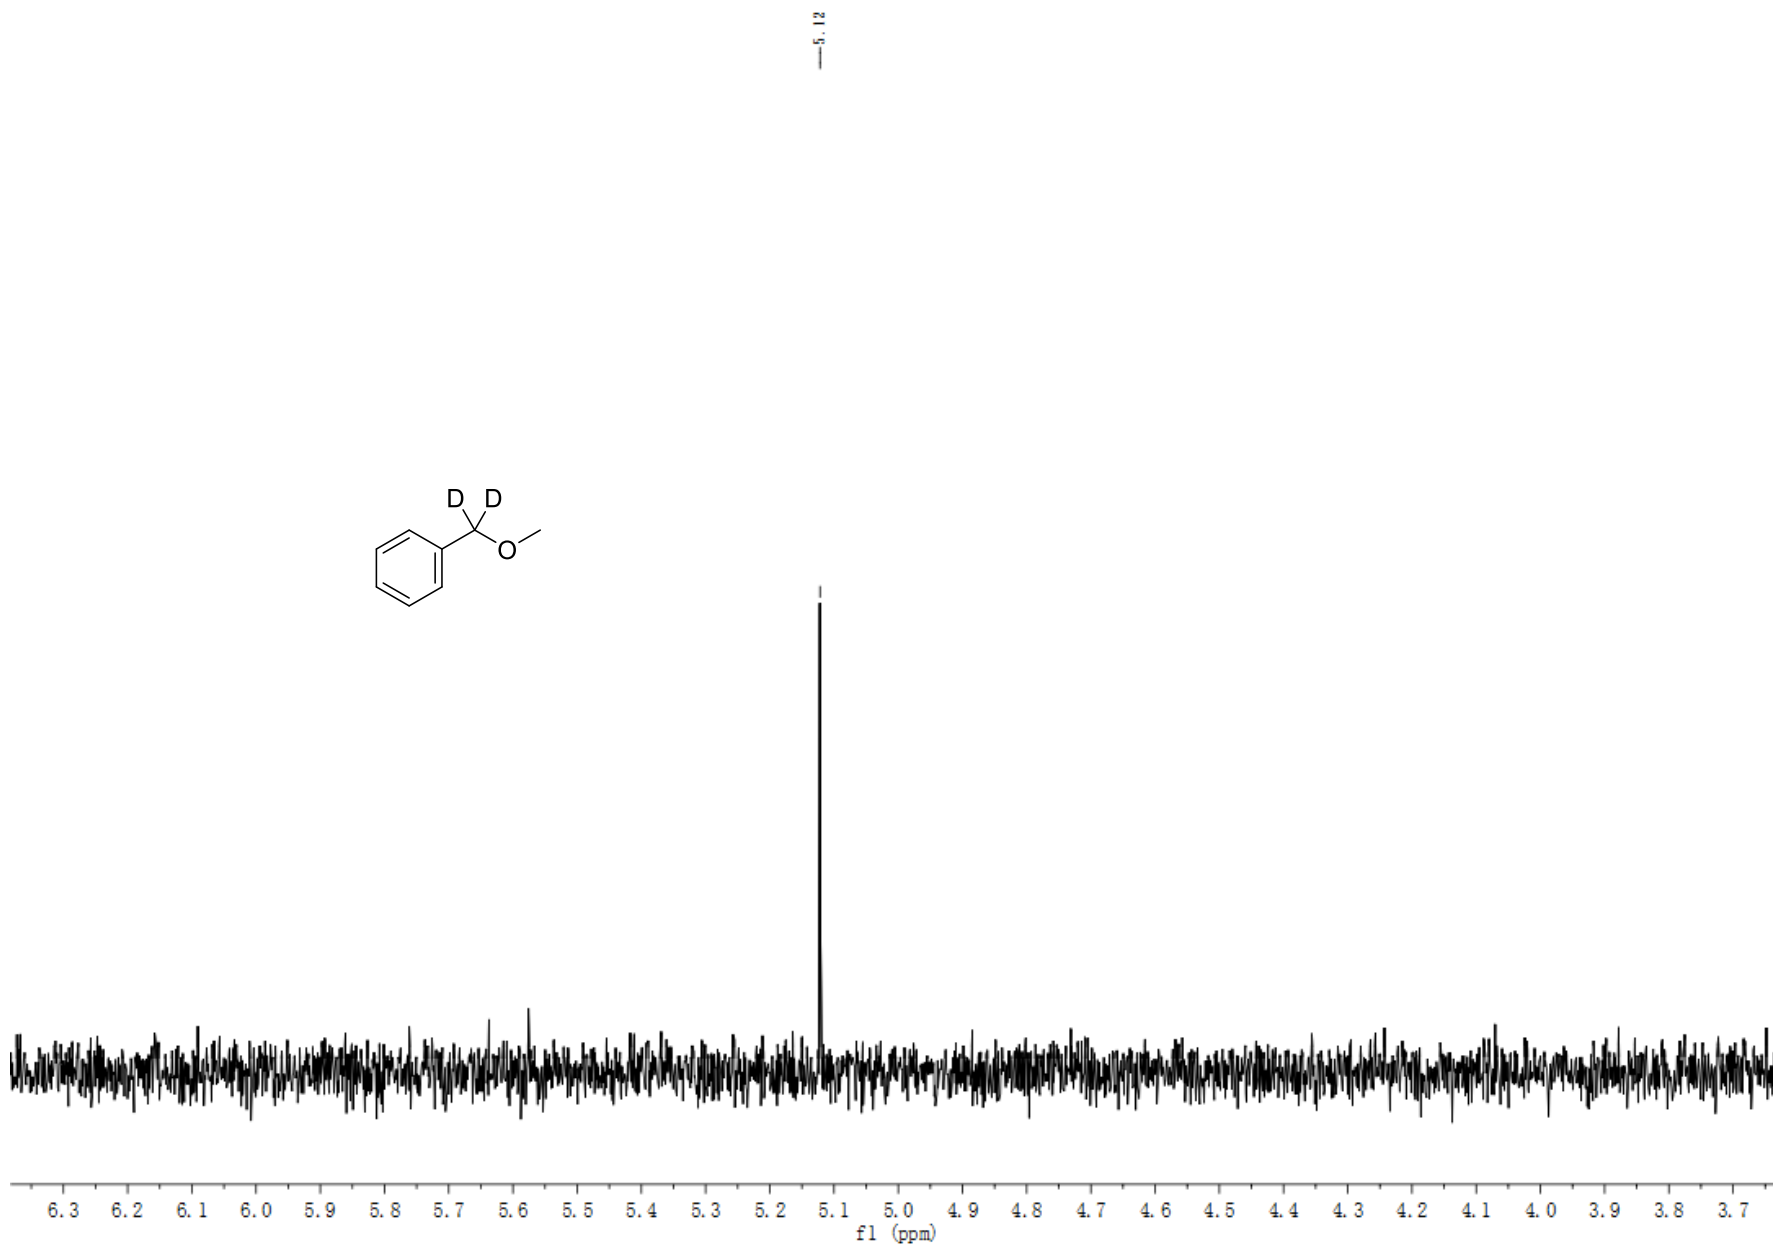

Figure S79. <sup>2</sup>H NMR spectra of 1y-d<sub>2</sub> (DCM, 92M)

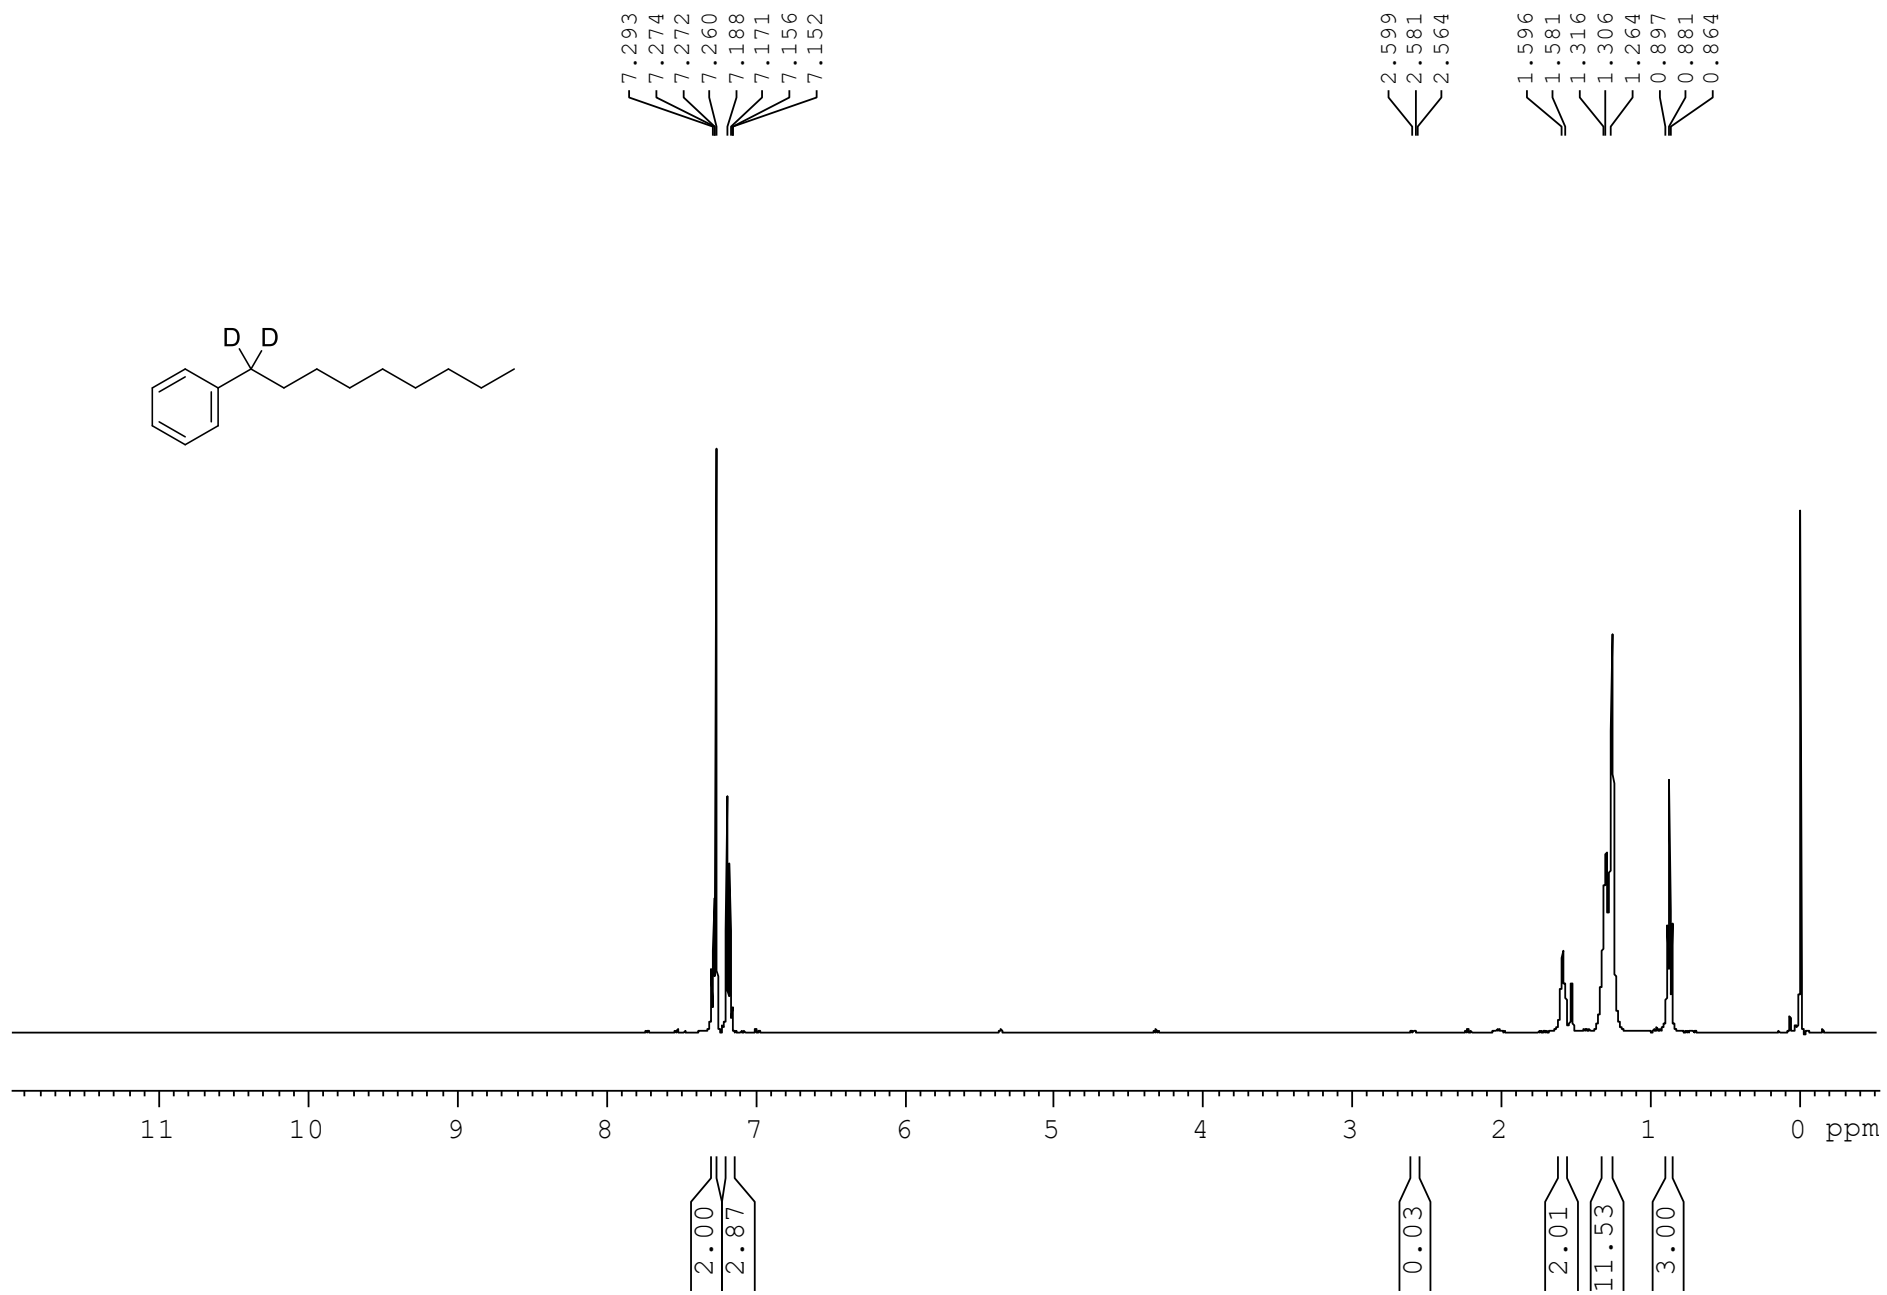

Figure S80. <sup>1</sup>H NMR spectra of **1z-d<sub>2</sub>** (CDCl<sub>3</sub>, 400 M)

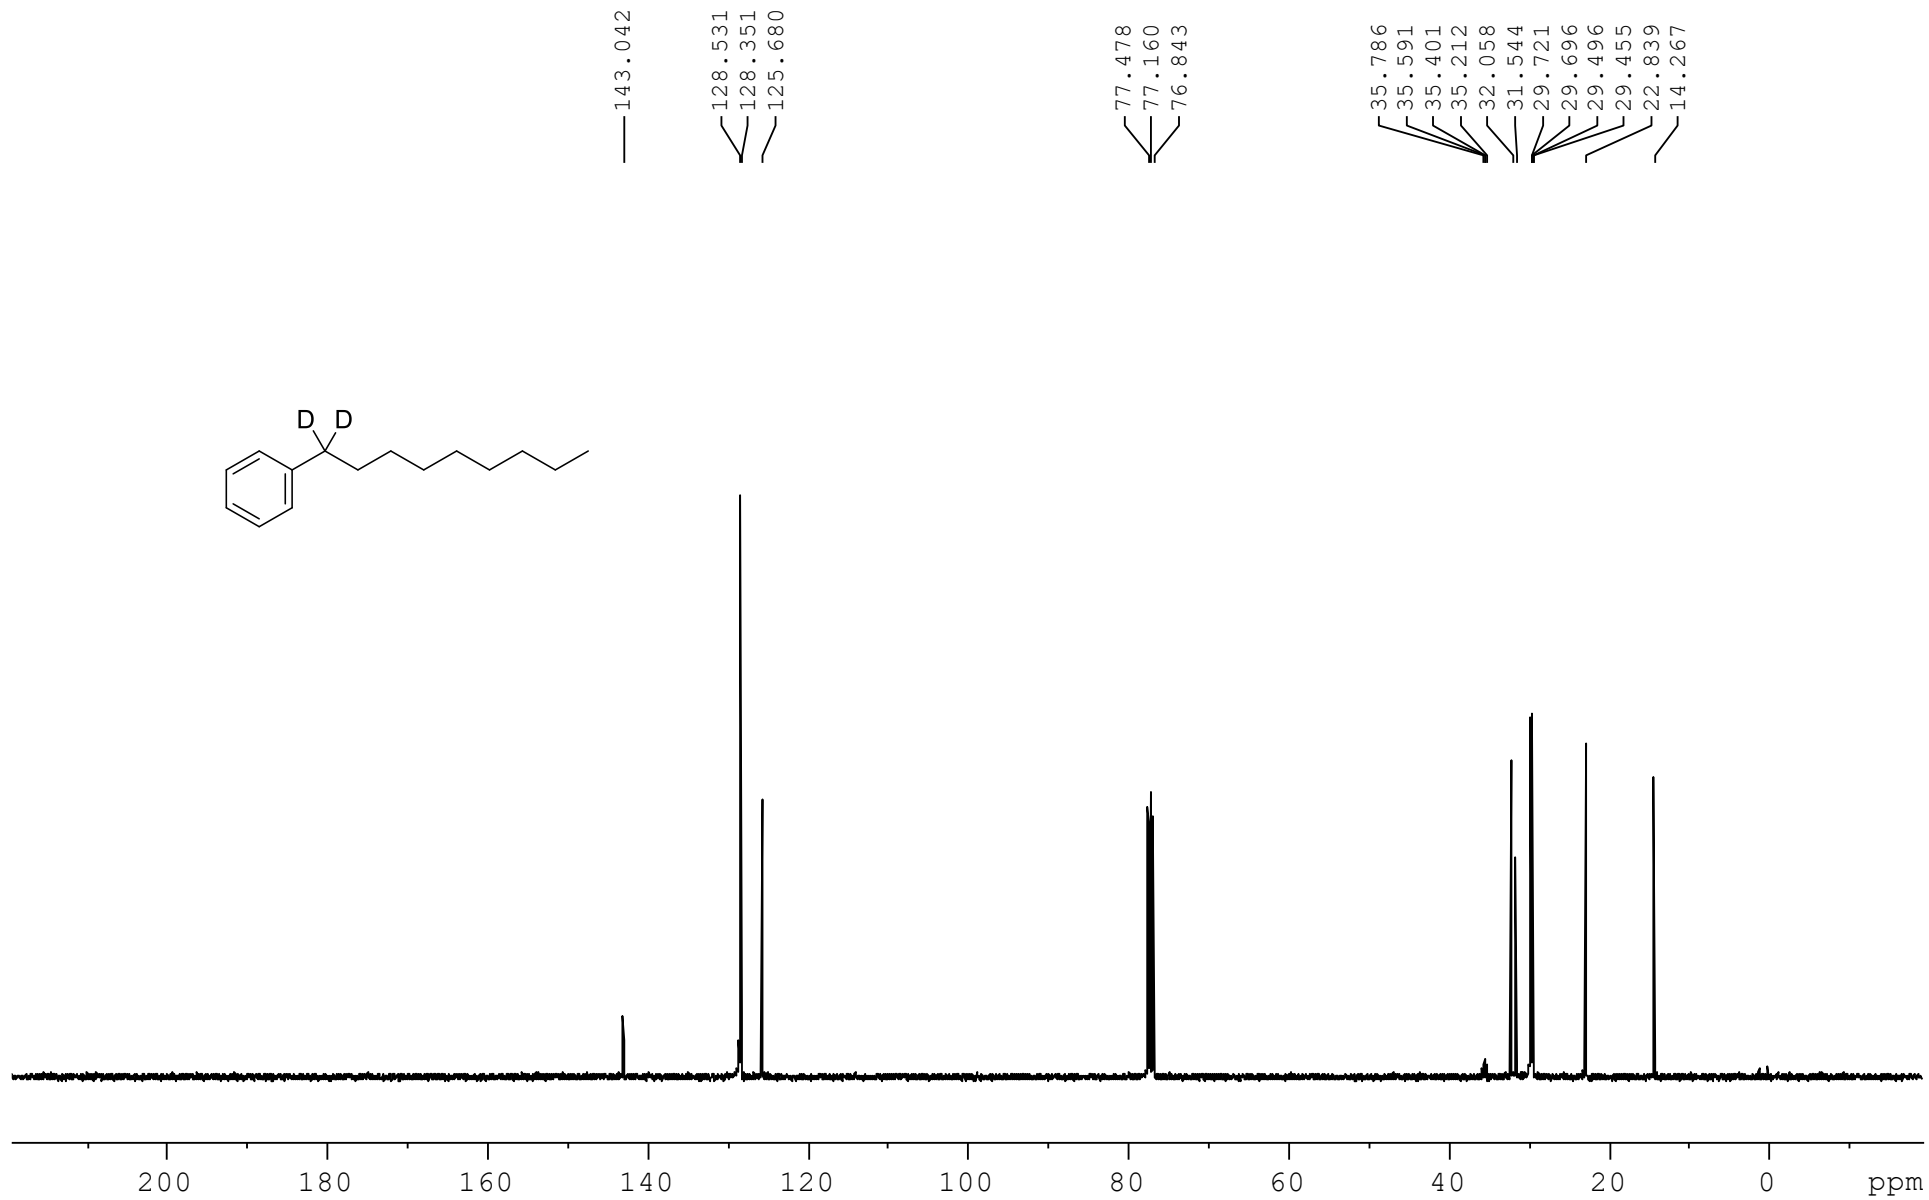

Figure S81. <sup>13</sup>C NMR spectra of 1z-d<sub>2</sub> (CDCl<sub>3</sub>, 100 M)

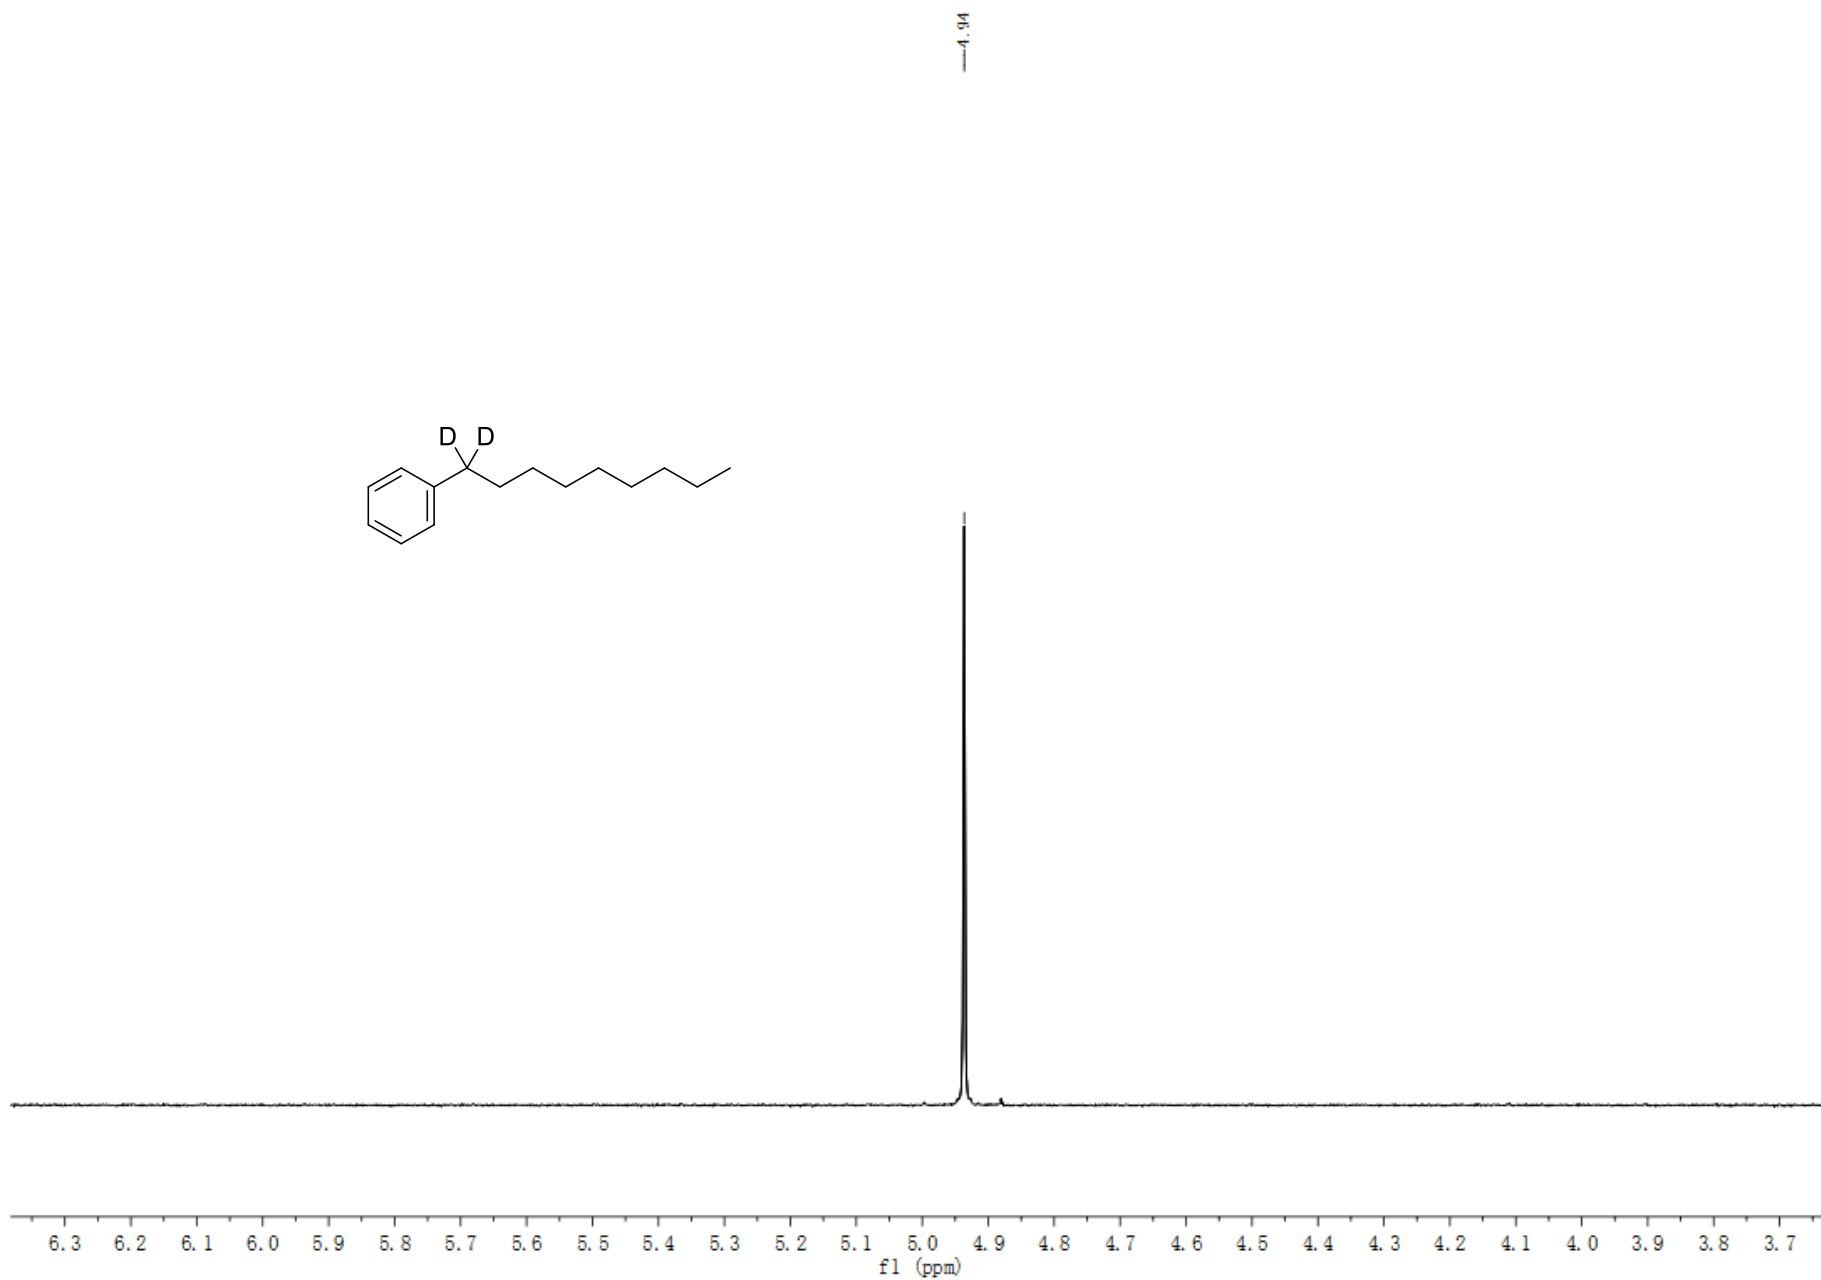

**Figure S82.**  $^2\text{H}$  NMR spectra of **1z-d<sub>2</sub>** ( $\text{MeCN}$ , 92 M)
